# Supplementary material for: Monitoring GAPDH activity and inhibition with cysteine-reactive chemical probes
Source: Royal Society of Chemistry journal article supplement (doi:10.1039/d2cb00091a), 2022-01-01
Supplement: d2cb00091a3.xlsx [file d2cb00091a3.xlsx]

## Sheet: Jurkat 10uM KA
index	ipi	description	symbol	sequence	mr.set_1	mr.set_2	mr.set_3	Corrected mr.set_1	Corrected mr.set_2	Corrected mr.set_3	Count	Average	St. Dev	St. Dev/Average	Average Ratio (log2)
1	P04075	ALDOA Fructose-bisphosphate aldolase A	ALDOA	R.C*QYVTEK.V		0.26	0.18		0.224138	0.18	2	0.202069	0.0312102	0.154453	-2.30708
6	P04406	GAPDH Glyceraldehyde-3-phosphate dehydrogenase	GAPDH	R.VPTANVSVVDLTC*R.L	0.21	0.22	0.26	0.201923	0.189655	0.26	3	0.217193	0.0375762	0.173009	-2.20295
5	P52948	NUP98 Nuclear pore complex protein Nup98-Nup96	NUP98	R.HC*QLLETPESWAK.E		0.47	0.25		0.405172	0.25	2	0.327586	0.109723	0.334945	-1.61005
7	P62937	PPIA Peptidyl-prolyl cis-trans isomerase A	PPIA	K.KITIADC*GQLE.-		0.46	0.28		0.396552	0.28	2	0.338276	0.0824145	0.243631	-1.56373
10	P62333	PSMC6 26S proteasome regulatory subunit 10B	PSMC6	R.AVASQLDC*NFLK.V		0.45	0.3		0.387931	0.3	2	0.343966	0.0621766	0.180764	-1.53966
23	P62333	PSMC6 26S proteasome regulatory subunit 10B	PSMC6	K.GC*LLYGPPGTGK.T	0.36	0.36	0.38	0.346154	0.310345	0.38	3	0.3455	0.0348322	0.100817	-1.53324
11	P27797	CALR Calreticulin	CALR	K.HEQNIDC*GGGYVK.L		0.54	0.3		0.465517	0.3	2	0.382759	0.117038	0.305776	-1.38549
12	Q9Y3C6	PPIL1 Peptidyl-prolyl cis-trans isomerase-like 1	PPIL1	R.VC*QGIGMVNR.V		0.55	0.3		0.474138	0.3	2	0.387069	0.123134	0.318119	-1.36934
25	P60709	ACTB Actin, cytoplasmic 1	ACTB	K.C*DVDIR.K	0.4	0.5	0.39	0.384615	0.431034	0.39	3	0.401883	0.0253888	0.0631746	-1.31515
29	P60953	CDC42 Cell division control protein 42 homolog	CDC42	K.YVEC*SALTQK.G		0.51	0.42		0.439655	0.42	2	0.429828	0.0138983	0.0323346	-1.21817
14	P31146	CORO1A Coronin-1A	CORO1A	R.VSQTTWDSGFC*AVNPK.F		0.64	0.33		0.551724	0.33	2	0.440862	0.156783	0.355627	-1.1816
32	P60709	ACTB Actin, cytoplasmic 1	ACTB	K.EKLC*YVALDFEQEMATAASSSSLEK.S	0.5	0.56	0.44	0.480769	0.482759	0.44	3	0.467843	0.0241329	0.0515834	-1.0959
38	Q9UQ80	PA2G4 Proliferation-associated protein 2G4	PA2G4	R.MGVVEC*AK.H		0.55	0.47		0.474138	0.47	2	0.472069	0.00292596	0.00619816	-1.08293
44	Q9UNS1	TIMELESS Protein timeless homolog	TIMELESS	R.FAC*STVVR.A	0.49		0.48	0.471154		0.48	2	0.475577	0.00625518	0.0131528	-1.07225
35	P68104	EEF1A1 Elongation factor 1-alpha 1	EEF1A1	K.NMITGTSQADC*AVLIVAAGVGEFEAGISK.N	0.62		0.45	0.596154		0.45	2	0.523077	0.103346	0.197574	-0.934905
72	P15153	RAC2 Ras-related C3 botulinum toxin substrate 2	RAC2	K.YLEC*SALTQR.G		0.56	0.57		0.482759	0.57	2	0.526379	0.061689	0.117195	-0.925825
81	P35998	PSMC2 26S proteasome regulatory subunit 7	PSMC2	R.LC*PNSTGAEIR.S	0.46	0.69	0.58	0.442308	0.594828	0.58	3	0.539045	0.0841044	0.156025	-0.891522
99	Q9UBT2	UBA2 SUMO-activating enzyme subunit 2	UBA2	R.VLVVGAGGIGC*ELLK.N	0.51		0.6	0.490385		0.6	2	0.545192	0.0775098	0.14217	-0.875163
46	Q8WYB5	KAT6B Histone acetyltransferase KAT6B	KAT6B	R.WQC*IECK.T		0.7	0.5		0.603448	0.5	2	0.551724	0.073149	0.132583	-0.857981
128	P22234	PAICS Multifunctional protein ADE2	PAICS	K.AC*GNFGIPCELR.V		0.56	0.64		0.482759	0.64	2	0.561379	0.111186	0.198059	-0.832952
80	O60264	SMARCA5 SWI/SNF-related matrix-associated actin-dependent	SMARCA5	R.SVC*LIGDKEQR.A	0.82	0.41	0.58	0.788462	0.353448	0.58	3	0.57397	0.217569	0.37906	-0.800953
114	O14929	HAT1 Histone acetyltransferase type B catalytic subunit	HAT1	K.C*NTNTAIELK.L		0.62	0.62		0.534483	0.62	2	0.577241	0.0604698	0.104757	-0.792753
34	Q14C86	GAPVD1 GTPase-activating protein and VPS9 domain-containi	GAPVD1	R.DKVQC*ILR.M		0.83	0.45		0.715517	0.45	2	0.582759	0.187749	0.322173	-0.77903
24	Q9UG63	ABCF2 ATP-binding cassette sub-family F member 2	ABCF2	K.TLSFYFPPC*GK.I	0.82		0.38	0.788462		0.38	2	0.584231	0.288826	0.49437	-0.77539
85	Q9BSD7	NTPCR Cancer-related nucleoside-triphosphatase	NTPCR	R.VC*VIDEIGK.M		0.68	0.59		0.586207	0.59	2	0.588103	0.00268213	0.00456064	-0.765858
39	Q9NU22	MDN1 Midasin	MDN1	R.FAASNPC*GNIQR.S		0.82	0.47		0.706897	0.47	2	0.588448	0.167511	0.284666	-0.765012
22	Q8WUW1	BRK1 Protein BRICK1	BRK1	K.IADFLNSFDMSC*R.S		0.94	0.37		0.810345	0.37	2	0.590172	0.311371	0.527593	-0.760792
1495	Q9UBE0	SAE1 SUMO-activating enzyme subunit 1	SAE1	K.GNGIVEC*LGPK.-	0.83	0.45		0.798077	0.387931		2	0.593004	0.290017	0.489064	-0.753886
91	P35250	RFC2 Replication factor C subunit 2	RFC2	R.FALAC*NASDK.I	0.62	0.68	0.6	0.596154	0.586207	0.6	3	0.59412	0.00711787	0.0119805	-0.751173
145	P46060	RANGAP1 Ran GTPase-activating protein 1	RANGAP1	K.SSAC*FTLQELK.L		0.62	0.66		0.534483	0.66	2	0.597241	0.0887541	0.148607	-0.743614
129	Q9Y263	PLAA Phospholipase A-2-activating protein	PLAA	K.HGEC*AQTIR.L		0.65	0.64		0.560345	0.64	2	0.600172	0.0563247	0.0938476	-0.736551
306	Q7Z6Z7	HUWE1 E3 ubiquitin-protein ligase HUWE1	HUWE1	R.HIIEDPC*TLR.H		0.5	0.78		0.431034	0.78	2	0.605517	0.246756	0.407513	-0.72376
146	O60763	USO1 General vesicular transport factor p115	USO1	R.VLVSPTNPPGATSSC*QK.A		0.64	0.66		0.551724	0.66	2	0.605862	0.0765626	0.12637	-0.722939
54	P35998	PSMC2 26S proteasome regulatory subunit 7	PSMC2	R.AVANRTDAC*FIR.V	0.71	0.74	0.52	0.682692	0.637931	0.52	3	0.613541	0.0840437	0.136981	-0.704768
202	P50213	IDH3A Isocitrate dehydrogenase [NAD] subunit alpha, mito	IDH3A	R.IEAAC*FATIK.D	0.36	0.91	0.71	0.346154	0.784483	0.71	3	0.613546	0.234544	0.382276	-0.704758
1493	Q9ULV4	CORO1C Coronin-1C	CORO1C	K.KC*DLISIPK.K	0.99	0.32		0.951923	0.275862		2	0.613893	0.478047	0.778715	-0.703942
19	P06400	RB1 Retinoblastoma-associated protein	RB1	R.LNTLC*ER.L	0.68	0.98	0.36	0.653846	0.844828	0.36	3	0.619558	0.244226	0.394194	-0.690689
103	P26641	EEF1G Elongation factor 1-gamma	EEF1G	R.AVLGEVKLC*EK.M		0.73	0.61		0.62931	0.61	2	0.619655	0.0136545	0.0220356	-0.690462
102	Q86Y56	DNAAF5 Dynein assembly factor 5, axonemal	DNAAF5	R.RPPEAC*EELR.L	0.76	0.62	0.61	0.730769	0.534483	0.61	3	0.625084	0.0990088	0.158393	-0.677878
107	P42695	NCAPD3 Condensin-2 complex subunit D3	NCAPD3	R.APLAVTSQVINC*R.N	0.67		0.61	0.644231		0.61	2	0.627115	0.0242048	0.0385971	-0.673197
93	P61962	DCAF7 DDB1- and CUL4-associated factor 7	DCAF7	R.VPC*TPVAR.L		0.77	0.6		0.663793	0.6	2	0.631897	0.0451085	0.071386	-0.66224
92	P35250	RFC2 Replication factor C subunit 2	RFC2	K.TTSILC*LAR.A	0.71	0.72	0.6	0.682692	0.62069	0.6	3	0.634461	0.0430318	0.0678242	-0.656397
131	Q92973	TNPO1 Transportin-1	TNPO1	K.SEC*LNNIGDSSPLIR.A		0.73	0.64		0.62931	0.64	2	0.634655	0.00755873	0.01191	-0.655955
420	P62424	RPL7A 60S ribosomal protein L7a	RPL7A	K.MGVPYC*IIK.G	0.45		0.84	0.432692		0.84	2	0.636346	0.28801	0.4526	-0.652116
1506	O00567	NOP56 Nucleolar protein 56	NOP56	R.IDC*FSEVPTSVFGEK.L	0.59	0.82		0.567308	0.706897		2	0.637102	0.0987042	0.154927	-0.650403
63	Q1KMD3	HNRNPUL2 Heterogeneous nuclear ribonucleoprotein U-like pro	HNRNPUL2	R.NFILDQC*NVYNSGQR.R	0.71	0.79	0.55	0.682692	0.681034	0.55	3	0.637909	0.0761359	0.119352	-0.648578
55	Q14684	RRP1B Ribosomal RNA processing protein 1 homolog B	RRP1B	K.EVLC*PESQSPNGVR.F		0.89	0.52		0.767241	0.52	2	0.643621	0.174826	0.271629	-0.635717
132	P35998	PSMC2 26S proteasome regulatory subunit 7	PSMC2	R.SVC*TEAGMFAIR.A	0.7	0.74	0.64	0.673077	0.637931	0.64	3	0.650336	0.0197214	0.0303249	-0.620743
159	Q9UBB4	ATXN10 Ataxin-10	ATXN10	R.NAC*IEC*SVNQNSIR.N	0.66		0.67	0.634615		0.67	2	0.652308	0.0250207	0.0383572	-0.616375
199	O15355	PPM1G Protein phosphatase 1G	PPM1G	K.C*SGDGVGAPR.L	0.51	0.88	0.71	0.490385	0.758621	0.71	3	0.653002	0.142913	0.218856	-0.614841
122	Q13905	RAPGEF1 Rap guanine nucleotide exchange factor 1	RAPGEF1	R.IQHSSALSSC*YSR.V	0.71		0.63	0.682692		0.63	2	0.656346	0.0372591	0.0567674	-0.607471
56	P00558	PGK1 Phosphoglycerate kinase 1	PGK1	K.TGQATVASGIPAGWMGLDC*GPESSK.K		0.92	0.52		0.793103	0.52	2	0.656552	0.193113	0.294133	-0.607019
94	O43390	HNRNPR Heterogeneous nuclear ribonucleoprotein R	HNRNPR	K.LC*DSYEIRPGK.H		0.83	0.6		0.715517	0.6	2	0.657759	0.081683	0.124184	-0.60437
104	O43143	DHX15 Pre-mRNA-splicing factor ATP-dependent RNA helicas	DHX15	R.GVAC*TQPR.R		0.82	0.61		0.706897	0.61	2	0.658448	0.0685162	0.104057	-0.602858
115	P48735	IDH2 Isocitrate dehydrogenase [NADP], mitochondrial	IDH2	K.C*ATITPDEAR.V		0.81	0.62		0.698276	0.62	2	0.659138	0.0553494	0.0839724	-0.601348
133	P00558	PGK1 Phosphoglycerate kinase 1	PGK1	R.GCITIIGGGDTATC*CAK.W		0.79	0.64		0.681034	0.64	2	0.660517	0.0290158	0.0439288	-0.598332
160	Q9Y6C9	MTCH2 Mitochondrial carrier homolog 2	MTCH2	K.YCGLC*DSIITIYR.E	0.68		0.67	0.653846		0.67	2	0.661923	0.0114225	0.0172565	-0.595265
95	P63010	AP2B1 AP-2 complex subunit beta	AP2B1	K.TAAVC*VAK.L		0.84	0.6		0.724138	0.6	2	0.662069	0.0877788	0.132583	-0.594947
105	Q08211	DHX9 ATP-dependent RNA helicase A	DHX9	R.AAEC*NIVVTQPR.R		0.83	0.61		0.715517	0.61	2	0.662759	0.074612	0.112578	-0.593445
43	P17844	DDX5 Probable ATP-dependent RNA helicase DDX5	DDX5	R.LKSTC*IYGGAPK.G	0.96	0.68	0.48	0.923077	0.586207	0.48	3	0.663095	0.231329	0.348863	-0.592713
171	Q92797	SYMPK Symplekin	SYMPK	K.ATNLC*FAER.N		0.74	0.69		0.637931	0.69	2	0.663966	0.0368183	0.0554522	-0.59082
59	Q92973	TNPO1 Transportin-1	TNPO1	R.SNILTLMYQC*MQDK.M	0.83		0.53	0.798077		0.53	2	0.664038	0.189559	0.285464	-0.590661
82	O14733	MAP2K7 Dual specificity mitogen-activated protein kinase	MAP2K7	R.SAGC*AAYMAPER.I		0.87	0.58		0.75	0.58	2	0.665	0.120208	0.180764	-0.588574
176	Q14683	SMC1A Structural maintenance of chromosomes protein 1A	SMC1A	R.NSSAQAFLGPENPEEPYLDGINYNC*VAPGKR.F	0.67		0.69	0.644231		0.69	2	0.667115	0.0323637	0.0485129	-0.583992
147	O43169	CYB5B Cytochrome b5 type B	CYB5B	K.QYYIGDIHPSDLKPESGSKDPSKNDTC*K.S	0.77	0.71	0.66	0.740385	0.612069	0.66	3	0.670818	0.0648382	0.0966555	-0.576007
61	Q86U90	YRDC YrdC domain-containing protein, mitochondrial	YRDC	R.SEAKPLAVC*LGR.V		0.94	0.54		0.810345	0.54	2	0.675172	0.191163	0.283132	-0.566672
106	P31943	HNRNPH1 Heterogeneous nuclear ribonucleoprotein H	HNRNPH1	R.FFSDC*K.I		0.86	0.61		0.741379	0.61	2	0.67569	0.0928992	0.137488	-0.565567
86	Q6FI81	CIAPIN1 Anamorsin	CIAPIN1	K.NC*TCGLAEELEKEK.S		0.89	0.59		0.767241	0.59	2	0.678621	0.125329	0.184681	-0.559323
149	P49327	FASN Fatty acid synthase	FASN	R.LSIPTYGLQC*TR.A		0.81	0.66		0.698276	0.66	2	0.679138	0.0270651	0.0398522	-0.558223
134	Q8TDN6	BRIX1 Ribosome biogenesis protein BRX1 homolog	BRIX1	K.MTGNC*LK.G		0.84	0.64		0.724138	0.64	2	0.682069	0.0594945	0.0872265	-0.55201
210	Q5TGZ0	MINOS1 MICOS complex subunit MIC10	MINOS1	R.C*LADAVVK.I		0.75	0.72		0.646552	0.72	2	0.683276	0.0519358	0.07601	-0.54946
158	Q13098	GPS1 COP9 signalosome complex subunit 1	GPS1	K.C*AAGLAELAAR.K		0.82	0.67		0.706897	0.67	2	0.688448	0.0260898	0.0378965	-0.53858
249	Q68CP9	ARID2 AT-rich interactive domain-containing protein 2	ARID2	R.SC*SNAAFALK.Q	0.69	0.77	0.74	0.663462	0.663793	0.74	3	0.689085	0.0440941	0.0639894	-0.537246
195	P11388	TOP2A DNA topoisomerase 2-alpha	TOP2A	K.SFGSTC*QLSEK.F		0.78	0.71		0.672414	0.71	2	0.691207	0.0265775	0.0384508	-0.53281
485	P43686	PSMC4 26S proteasome regulatory subunit 6B	PSMC4	K.ISGADINSIC*QESGMLAVR.E		0.59	0.88		0.508621	0.88	2	0.69431	0.262605	0.378224	-0.526347
26	P78559	MAP1A Microtubule-associated protein 1A	MAP1A	R.SIEEAC*LTLQHLNR.L	1.04		0.39	1		0.39	2	0.695	0.431335	0.620626	-0.524915
211	O95081	AGFG2 Arf-GAP domain and FG repeat-containing protein 2	AGFG2	R.ELGGC*SQAGNR.H		0.78	0.72		0.672414	0.72	2	0.696207	0.0336485	0.0483312	-0.522412
117	P52732	KIF11 Kinesin-like protein KIF11	KIF11	K.QTHSQELC*K.L		0.9	0.62		0.775862	0.62	2	0.697931	0.110211	0.157911	-0.518844
47	Q9ULX6	AKAP8L A-kinase anchor protein 8-like	AKAP8L	R.GQC*MSGASR.L	0.78	0.98	0.5	0.75	0.844828	0.5	3	0.698276	0.178138	0.255111	-0.518131
108	Q16566	CAMK4 Calcium/calmodulin-dependent protein kinase type I	CAMK4	K.TVC*GTPGYCAPEILR.G	0.82		0.61	0.788462		0.61	2	0.699231	0.126191	0.180472	-0.516159
116	P50991	CCT4 T-complex protein 1 subunit delta	CCT4	K.ITGC*ASPGK.T	0.74	0.89	0.62	0.711538	0.767241	0.62	3	0.699593	0.0743439	0.106267	-0.515412
533	Q8TC07	TBC1D15 TBC1 domain family member 15	TBC1D15	R.TLLVNC*QNK.S		0.58	0.9		0.5	0.9	2	0.7	0.282843	0.404061	-0.514573
27	Q9Y6I9	TEX264 Testis-expressed protein 264	TEX264	R.KLC*AYPR.L	1.04		0.4	1		0.4	2	0.7	0.424264	0.606092	-0.514573
265	Q15782	CHI3L2 Chitinase-3-like protein 2	CHI3L2	K.SC*NQGPYPLVQAVK.R	0.75	0.73	0.75	0.721154	0.62931	0.75	3	0.700155	0.0630256	0.0900166	-0.514254
21	P11586	MTHFD1 C-1-tetrahydrofolate synthase, cytoplasmic	MTHFD1	K.C*THWAEGGK.G	1.22	0.65	0.37	1.17308	0.560345	0.37	3	0.701141	0.419644	0.598516	-0.512224
240	P61086	UBE2K Ubiquitin-conjugating enzyme E2 K	UBE2K	K.IENLC*AMGFDR.N	0.7		0.73	0.673077		0.73	2	0.701538	0.0402507	0.0573749	-0.511406
1523	O00483	NDUFA4 Cytochrome c oxidase subunit NDUFA4	NDUFA4	R.LALFNPDVC*WDR.N	0.59	0.97		0.567308	0.836207		2	0.701757	0.19014	0.270949	-0.510956
250	Q63HN8	RNF213 E3 ubiquitin-protein ligase RNF213	RNF213	R.ASVGC*GSEAAR.Y		0.77	0.74		0.663793	0.74	2	0.701897	0.0538864	0.0767726	-0.51067
163	O00567	NOP56 Nucleolar protein 56	NOP56	K.IINDNATYC*R.L		0.84	0.68		0.724138	0.68	2	0.702069	0.0312102	0.0444547	-0.510315
87	Q14204	DYNC1H1 Cytoplasmic dynein 1 heavy chain 1	DYNC1H1	R.LSC*LPAFK.D		0.95	0.59		0.818966	0.59	2	0.704483	0.161903	0.229818	-0.505364
49	P62906	RPL10A 60S ribosomal protein L10a	RPL10A	K.FSVC*VLGDQQHC*DEAK.A	0.94		0.51	0.903846		0.51	2	0.706923	0.278491	0.393949	-0.500375
388	O00567	NOP56 Nucleolar protein 56	NOP56	R.LVAFC*PFASSQVALENANAVSEGVVHEDLR.L	0.62		0.82	0.596154		0.82	2	0.708077	0.158283	0.223539	-0.498022
446	P30519	HMOX2 Heme oxygenase 2	HMOX2	R.KC*PFYAAEQDK.G	0.69	0.7	0.86	0.663462	0.603448	0.86	3	0.70897	0.134194	0.18928	-0.496204
40	Q8IY37	DHX37 Probable ATP-dependent RNA helicase DHX37	DHX37	R.LSC*PITALGR.T		1.1	0.47		0.948276	0.47	2	0.709138	0.338192	0.476906	-0.495862
64	P14866	HNRNPL Heterogeneous nuclear ribonucleoprotein L	HNRNPL	K.LNVC*VSK.Q		1.01	0.55		0.87069	0.55	2	0.710345	0.226762	0.319228	-0.493409
165	P08865	RPSA 40S ribosomal protein SA	RPSA	R.YVDIAIPC*NNK.G		0.86	0.68		0.741379	0.68	2	0.71069	0.0434017	0.0610699	-0.492708
164	Q00765	REEP5 Receptor expression-enhancing protein 5	REEP5	K.NC*MTDLLAK.L		0.86	0.68		0.741379	0.68	2	0.71069	0.0434017	0.0610699	-0.492708
48	O75179	ANKRD17 Ankyrin repeat domain-containing protein 17	ANKRD17	R.TKDTPLSLAC*SGGR.Q	0.96		0.5	0.923077		0.5	2	0.711538	0.299161	0.420442	-0.490986
292	Q13404	UBE2V1 Ubiquitin-conjugating enzyme E2 variant 1	UBE2V1	K.LPQPPEGQC*YSN.-		0.76	0.77		0.655172	0.77	2	0.712586	0.0811954	0.113945	-0.488864
88	P14866	HNRNPL Heterogeneous nuclear ribonucleoprotein L	HNRNPL	K.ASLNGADIYSGC*C*TLK.I	0.87		0.59	0.836538		0.59	2	0.713269	0.174329	0.244408	-0.487481
150	P31943	HNRNPH1 Heterogeneous nuclear ribonucleoprotein H	HNRNPH1	R.GLPWSC*SADEVQR.F		0.89	0.66		0.767241	0.66	2	0.713621	0.0758311	0.106262	-0.486771
177	O15131	KPNA5 Importin subunit alpha-6	KPNA5	R.NAVWALSNLC*R.G	0.77		0.69	0.740385		0.69	2	0.715192	0.0356273	0.049815	-0.483597
241	P60709	ACTB Actin, cytoplasmic 1	ACTB	K.QEYDESGPSIVHRKC*F.-	0.73		0.73	0.701923		0.73	2	0.715962	0.0198534	0.0277297	-0.482046
184	P30876	POLR2B DNA-directed RNA polymerase II subunit RPB2	POLR2B	R.MPYAC*K.L		0.85	0.7		0.732759	0.7	2	0.716379	0.0231638	0.0323346	-0.481204
196	Q9UBB4	ATXN10 Ataxin-10	ATXN10	R.NAC*IECSVNQNSIR.N		0.84	0.71		0.724138	0.71	2	0.717069	0.00999703	0.0139415	-0.479816
74	O43175	PHGDH D-3-phosphoglycerate dehydrogenase	PHGDH	K.NAGNC*LSPAVIVGLLK.E	0.9		0.57	0.865385		0.57	2	0.717692	0.208868	0.291028	-0.478563
83	Q9NVI1	FANCI Fanconi anemia group I protein	FANCI	R.YYLQVC*QSSGGIPK.N	0.89		0.58	0.855769		0.58	2	0.717885	0.194998	0.271629	-0.478176
232	Q9Y2X3	NOP58 Nucleolar protein 58	NOP58	K.IISDNLTYC*K.C		0.82	0.73		0.706897	0.73	2	0.718448	0.0163366	0.0227387	-0.477044
197	P09497	CLTB Clathrin light chain B	CLTB	K.VAQLC*DFNPK.S		0.85	0.71		0.732759	0.71	2	0.721379	0.0160928	0.0223083	-0.47117
139	P55060	CSE1L Exportin-2	CSE1L	K.SQIC*DNAALYAQK.Y		0.92	0.65		0.793103	0.65	2	0.721552	0.101189	0.140239	-0.470825
84	P33993	MCM7 DNA replication licensing factor MCM7	MCM7	R.C*SILAAANPAYGR.Y	0.9		0.58	0.865385		0.58	2	0.722692	0.201797	0.27923	-0.468547
69	Q8TEX9	IPO4 Importin-4	IPO4	R.DNIC*GALAR.L		1.03	0.56		0.887931	0.56	2	0.723966	0.231882	0.320295	-0.466007
198	Q9BVL2	NUP58 Nucleoporin p58/p45	NUP58	K.ALKDENLPPVIC*QDVENLQK.F		0.86	0.71		0.741379	0.71	2	0.72569	0.0221885	0.0305758	-0.462575
334	P50991	CCT4 T-complex protein 1 subunit delta	CCT4	K.AQDIEAGDGTTSVVIIAGSLLDSC*TK.L	0.69		0.79	0.663462		0.79	2	0.726731	0.0894762	0.123122	-0.460507
252	Q15005	SPCS2 Signal peptidase complex subunit 2	SPCS2	R.SGGSGGC*SGAGGASNCGTGSGR.S		0.83	0.74		0.715517	0.74	2	0.727759	0.0173119	0.023788	-0.458468
268	O60831	PRAF2 PRA1 family protein 2	PRAF2	R.LAAPDPC*DPQR.W		0.82	0.75		0.706897	0.75	2	0.728448	0.0304787	0.0418406	-0.457102
242	Q14203	DCTN1 Dynactin subunit 1	DCTN1	K.VTFSC*AAGFGQR.H	0.76		0.73	0.730769		0.73	2	0.730385	0.000543928	0.000744715	-0.453272
213	Q14204	DYNC1H1 Cytoplasmic dynein 1 heavy chain 1	DYNC1H1	R.ITNQVIYLNPPIEEC*R.Y		0.86	0.72		0.741379	0.72	2	0.73069	0.0151175	0.0206893	-0.452669
233	Q8WVJ2	NUDCD2 NudC domain-containing protein 2	NUDCD2	R.AQDIQC*GLQSR.H		0.85	0.73		0.732759	0.73	2	0.731379	0.00195064	0.00266707	-0.451308
33	P23526	AHCY Adenosylhomocysteinase	AHCY	K.SKFDNLYGC*R.E	0.93	1	0.44	0.894231	0.862069	0.44	3	0.7321	0.253477	0.346232	-0.449888
557	P12268	IMPDH2 Inosine-5-monophosphate dehydrogenase 2	IMPDH2	R.DIDFLKEEEHDC*FLEEIMTK.R	0.59		0.9	0.567308		0.9	2	0.733654	0.235249	0.320654	-0.446829
214	Q8WUM4	PDCD6IP Programmed cell death 6-interacting protein	PDCD6IP	K.FIQQTYPSGGEEQAQYC*R.A		0.87	0.72		0.75	0.72	2	0.735	0.0212132	0.0288615	-0.444184
1519	Q7KZ85	SUPT6H Transcription elongation factor SPT6	SUPT6H	K.FSADLTC*R.T	0.68	0.95		0.653846	0.818966		2	0.736406	0.116757	0.15855	-0.441427
118	Q5JTH9	RRP12 RRP12-like protein	RRP12	K.GC*QAEADRAEVSR.F		0.99	0.62		0.853448	0.62	2	0.736724	0.165073	0.224063	-0.440804
130	Q8WWP7	GIMAP1 GTPase IMAP family member 1	GIMAP1	R.VC*AFDNR.A	1.03	0.7	0.64	0.990385	0.603448	0.64	3	0.744611	0.213629	0.286901	-0.425441
243	Q14204	DYNC1H1 Cytoplasmic dynein 1 heavy chain 1	DYNC1H1	R.EHSNPNYDKTSAPITC*ELLNK.Q	0.79		0.73	0.759615		0.73	2	0.744808	0.0209412	0.0281163	-0.42506
713	P49773	HINT1 Histidine triad nucleotide-binding protein 1	HINT1	K.KC*AADLGLNK.G		0.58	0.99		0.5	0.99	2	0.745	0.346482	0.465077	-0.424688
267	O00541	PES1 Pescadillo homolog	PES1	K.AGEGTYALDSESC*MEK.L	0.83	0.8	0.75	0.798077	0.689655	0.75	3	0.745911	0.0543264	0.0728323	-0.422925
186	Q9UMS0	NFU1 NFU1 iron-sulfur cluster scaffold homolog, mitocho	NFU1	K.LQGSC*TSCPSSIITLK.N		0.92	0.7		0.793103	0.7	2	0.746552	0.0658341	0.0881842	-0.421686
266	Q9HA92	RSAD1 Radical S-adenosyl methionine domain-containing pr	RSAD1	R.THSAC*DALR.T	0.87	0.76	0.75	0.836538	0.655172	0.75	3	0.747237	0.0907146	0.1214	-0.420362
216	P49411	TUFM Elongation factor Tu, mitochondrial	TUFM	K.KGDEC*ELLGHSK.N	0.74	0.94	0.72	0.711538	0.810345	0.72	3	0.747294	0.0547669	0.0732869	-0.420251
109	O00410	IPO5 Importin-5	IPO5	R.VQAHAAAALINFTEDC*PK.S	0.92		0.61	0.884615		0.61	2	0.747308	0.194182	0.259843	-0.420226
137	P30876	POLR2B DNA-directed RNA polymerase II subunit RPB2	POLR2B	R.DC*QIAHGAAQFLR.E	0.89		0.64	0.855769		0.64	2	0.747885	0.152572	0.204005	-0.419112
369	Q14152	EIF3A Eukaryotic translation initiation factor 3 subunit	EIF3A	K.NIC*QQVNIK.S	0.6	1	0.81	0.576923	0.862069	0.81	3	0.749664	0.151847	0.202553	-0.415684
173	Q7L5N1	COPS6 COP9 signalosome complex subunit 6	COPS6	K.TC*NTMNQFVNK.F	0.87	0.84	0.69	0.836538	0.724138	0.69	3	0.750225	0.0766733	0.1022	-0.414604
205	Q9UBE0	SAE1 SUMO-activating enzyme subunit 1	SAE1	K.KVVFC*PVK.E	0.67	1.04	0.71	0.644231	0.896552	0.71	3	0.750261	0.13089	0.174459	-0.414536
178	Q12906	ILF3 Interleukin enhancer-binding factor 3	ILF3	K.C*LAALASLR.H	0.85		0.69	0.817308		0.69	2	0.753654	0.0900201	0.119445	-0.408026
73	P22626	HNRNPA2B1 Heterogeneous nuclear ribonucleoproteins A2/B1	HNRNPA2B1	K.LTDC*VVMR.D		1.09	0.57		0.939655	0.57	2	0.754828	0.261386	0.346285	-0.405781
201	P00390	GSR Glutathione reductase, mitochondrial	GSR	K.LGGTC*VNVGCVPK.K	0.81	0.9	0.71	0.778846	0.775862	0.71	3	0.754903	0.0389155	0.0515504	-0.405637
200	P06400	RB1 Retinoblastoma-associated protein	RB1	K.AVGQGC*VEIGSQR.Y	0.81	0.9	0.71	0.778846	0.775862	0.71	3	0.754903	0.0389155	0.0515504	-0.405637
253	Q9UBB4	ATXN10 Ataxin-10	ATXN10	R.LIGNLC*YK.N	0.78	0.9	0.74	0.75	0.775862	0.74	3	0.755287	0.0185065	0.0245025	-0.404902
235	O75533	SF3B1 Splicing factor 3B subunit 1	SF3B1	R.VAIGPC*R.M	0.81	0.88	0.73	0.778846	0.758621	0.73	3	0.755822	0.024543	0.032472	-0.403881
212	Q9Y4R8	TELO2 Telomere length regulation protein TEL2 homolog	TELO2	K.AC*VHGR.Q	0.85	0.85	0.72	0.817308	0.732759	0.72	3	0.756689	0.0528837	0.0698883	-0.402228
231	O15042	U2SURP U2 snRNP-associated SURP motif-containing protein	U2SURP	R.VMTC*FR.A	0.87	0.82	0.73	0.836538	0.706897	0.73	3	0.757812	0.0691511	0.091251	-0.400089
572	Q9UBB4	ATXN10 Ataxin-10	ATXN10	K.ETTNIFSNC*GC*VR.A	0.63		0.91	0.605769		0.91	2	0.757885	0.215124	0.283847	-0.39995
277	O94906	PRPF6 Pre-mRNA-processing factor 6	PRPF6	R.HGELWC*AVSK.D	0.92	0.73	0.76	0.884615	0.62931	0.76	3	0.757975	0.127665	0.168428	-0.399777
280	O14733	MAP2K7 Dual specificity mitogen-activated protein kinase	MAP2K7	K.LC*DFGISGR.L		0.88	0.76		0.758621	0.76	2	0.75931	0.00097532	0.00128448	-0.397238
135	P46087	NOP2 Probable 28S rRNA (cytosine(4447)-C(5))-methyltran	NOP2	R.VLLDAPC*SGTGVISK.D		1.02	0.64		0.87931	0.64	2	0.759655	0.169218	0.222756	-0.396583
293	Q13045	FLII Protein flightless-1 homolog	FLII	R.NQLTSLPSAIC*K.L		0.87	0.77		0.75	0.77	2	0.76	0.0141421	0.0186081	-0.395929
299	P49411	TUFM Elongation factor Tu, mitochondrial	TUFM	R.ELLTEFGYKGEETPVIVGSALC*ALEGRDPELGLK.S	0.78		0.77	0.75		0.77	2	0.76	0.0141421	0.0186081	-0.395929
203	O14497	ARID1A AT-rich interactive domain-containing protein 1A	ARID1A	R.KNPVC*R.E	0.82	0.91	0.71	0.788462	0.784483	0.71	3	0.760981	0.044196	0.0580776	-0.394067
152	Q14204	DYNC1H1 Cytoplasmic dynein 1 heavy chain 1	DYNC1H1	K.VQYPQSQAC*K.M		1	0.66		0.862069	0.66	2	0.761034	0.142884	0.18775	-0.393966
421	P29590	PML Protein PML	PML	R.GCSKPLC*CSCALLDSSHSELK.C	0.71		0.84	0.682692		0.84	2	0.761346	0.111233	0.146101	-0.393376
215	Q13155	AIMP2 Aminoacyl tRNA synthase complex-interacting multif	AIMP2	R.SC*ENLAPFNTALK.L	0.84	0.89	0.72	0.807692	0.767241	0.72	3	0.764978	0.04389	0.0573741	-0.38651
329	Q8IX01	SUGP2 SURP and G-patch domain-containing protein 2	SUGP2	R.GADQKPTSADC*AVR.A		0.86	0.79		0.741379	0.79	2	0.76569	0.03438	0.0449007	-0.385168
300	Q92616	GCN1 eIF-2-alpha kinase activator GCN1	GCN1	R.KALC*DPLEEVR.E	0.8		0.77	0.769231		0.77	2	0.769615	0.000543928	0.000706753	-0.37779
153	Q99497	PARK7 Protein/nucleic acid deglycase DJ-1	PARK7	K.VTVAGLAGKDPVQC*SR.D		1.02	0.66		0.87931	0.66	2	0.769655	0.155076	0.201487	-0.377716
374	Q13542	EIF4EBP2 Eukaryotic translation initiation factor 4E-bindin	EIF4EBP2	R.TVAISDAAQLPHDYC*TTPGGTLFSTTPGGTR.I	0.76		0.81	0.730769		0.81	2	0.770385	0.0560246	0.0727229	-0.376349
327	Q9NX70	MED29 Mediator of RNA polymerase II transcription subuni	MED29	R.LAHEC*LSQSCDSAK.H	0.82	0.85	0.79	0.788462	0.732759	0.79	3	0.770407	0.0326133	0.0423326	-0.376308
412	Q00839	HNRNPU Heterogeneous nuclear ribonucleoprotein U	HNRNPU	R.APQC*LGK.F	0.8	0.82	0.84	0.769231	0.706897	0.84	3	0.772042	0.0665963	0.0862598	-0.373248
344	Q96SK2	TMEM209 Transmembrane protein 209	TMEM209	R.SQAPC*ANKDEADLSSK.Q		0.87	0.8		0.75	0.8	2	0.775	0.0353553	0.0456198	-0.367732
254	Q8TAQ2	SMARCC2 SWI/SNF complex subunit SMARCC2	SMARCC2	R.LNPQEYLTSTAC*R.R		0.94	0.74		0.810345	0.74	2	0.775172	0.0497413	0.0641681	-0.367411
422	Q01813	PFKP ATP-dependent 6-phosphofructokinase, platelet type	PFKP	K.YAYLNVVGMVGSIDNDFC*GTDMTIGTDSALHR.I	0.74		0.84	0.711538		0.84	2	0.775769	0.090836	0.117092	-0.366301
567	P78527	PRKDC DNA-dependent protein kinase catalytic subunit	PRKDC	R.FNNYVDC*MKK.F	0.92	0.62	0.91	0.884615	0.534483	0.91	3	0.776366	0.209861	0.270312	-0.365191
140	P09543	CNP 2,3-cyclic-nucleotide 3-phosphodiesterase	CNP	K.DKPELQFPFLQDEDTVATLLEC*K.T	0.79	1.07	0.65	0.759615	0.922414	0.65	3	0.777343	0.137069	0.176331	-0.363377
309	O14980	XPO1 Exportin-1	XPO1	R.TSESLC*QNNMVILK.L		0.9	0.78		0.775862	0.78	2	0.777931	0.00292596	0.00376121	-0.362286
270	Q15554	TERF2 Telomeric repeat-binding factor 2	TERF2	R.VMQC*LSR.I		0.94	0.75		0.810345	0.75	2	0.780172	0.0426702	0.0546933	-0.358135
395	Q13823	GNL2 Nucleolar GTP-binding protein 2	GNL2	K.KVC*NVAPIAGETK.V	0.97	0.68	0.83	0.932692	0.586207	0.83	3	0.782966	0.177967	0.227298	-0.352978
615	P63010	AP2B1 AP-2 complex subunit beta	AP2B1	K.DIPNENELQFQIKEC*HLNADTVSSK.L		0.73	0.94		0.62931	0.94	2	0.784655	0.219691	0.279984	-0.349869
96	Q99832	CCT7 T-complex protein 1 subunit eta	CCT7	R.YNFFTGC*PK.A	1	0.92	0.6	0.961538	0.793103	0.6	3	0.784881	0.180909	0.230493	-0.349455
100	P06239	LCK Tyrosine-protein kinase Lck	LCK	R.MVRPDNC*PEELYQLMR.L	1.01		0.6	0.971154		0.6	2	0.785577	0.262445	0.33408	-0.348176
507	Q9HCU9	BRMS1 Breast cancer metastasis-suppressor 1	BRMS1	R.NKYEC*ELQGAK.Q	0.72		0.88	0.692308		0.88	2	0.786154	0.132719	0.16882	-0.347116
179	Q92616	GCN1 eIF-2-alpha kinase activator GCN1	GCN1	K.C*LQNPSSDIR.L	0.92		0.69	0.884615		0.69	2	0.787308	0.137614	0.17479	-0.345001
278	O75934	BCAS2 Pre-mRNA-splicing factor SPF27	BCAS2	R.IENLELMSQHGC*NAWK.V	0.96	0.79	0.76	0.923077	0.681034	0.76	3	0.788037	0.123433	0.156633	-0.343664
810	P61289	PSME3 Proteasome activator complex subunit 3	PSME3	R.LDEC*EEAFQGTK.V	0.32	1.18	1.04	0.307692	1.01724	1.04	3	0.788311	0.416384	0.528197	-0.343163
236	Q6NZ67	MZT2B Mitotic-spindle organizing protein 2B	MZT2B	K.SMC*AGQR.L	0.84	0.96	0.73	0.807692	0.827586	0.73	3	0.788426	0.051567	0.065405	-0.342952
335	P62316	SNRPD2 Small nuclear ribonucleoprotein Sm D2	SNRPD2	K.AFDRHC*NMVLENVK.E	0.82		0.79	0.788462		0.79	2	0.789231	0.00108786	0.00137838	-0.341481
375	Q9BW19	KIFC1 Kinesin-like protein KIFC1	KIFC1	K.VNQC*VIGTAQANRK.-	0.8		0.81	0.769231		0.81	2	0.789615	0.0288282	0.0365092	-0.340778
366	P32322	PYCR1 Pyrroline-5-carboxylate reductase 1, mitochondrial	PYCR1	R.SLLINAVEASC*IR.T	0.82	0.9	0.81	0.788462	0.775862	0.81	3	0.791441	0.0172629	0.021812	-0.337446
330	Q92888	ARHGEF1 Rho guanine nucleotide exchange factor 1	ARHGEF1	R.FC*AFVQEAESRPR.C	0.87	0.87	0.79	0.836538	0.75	0.79	3	0.792179	0.0433104	0.0546724	-0.336101
237	Q70J99	UNC13D Protein unc-13 homolog D	UNC13D	R.VLVQMC*K.M	0.82	1	0.73	0.788462	0.862069	0.73	3	0.79351	0.0661791	0.0834004	-0.333679
384	Q14152	EIF3A Eukaryotic translation initiation factor 3 subunit	EIF3A	R.KLC*DNLR.M		0.89	0.82		0.767241	0.82	2	0.793621	0.037306	0.0470073	-0.333478
413	O43159	RRP8 Ribosomal RNA-processing protein 8	RRP8	K.AQLSGLQLQPC*LYK.R	0.85	0.84	0.84	0.817308	0.724138	0.84	3	0.793815	0.0613997	0.0773476	-0.333125
398	P83881	RPL36A 60S ribosomal protein L36a	RPL36A	R.LEC*VEPNCR.S		0.88	0.83		0.758621	0.83	2	0.79431	0.0504728	0.0635429	-0.332225
234	P35579	MYH9 Myosin-9	MYH9	R.NC*AAYLK.L	0.95	0.86	0.73	0.913462	0.741379	0.73	3	0.794947	0.102794	0.12931	-0.33107
423	O75643	SNRNP200 U5 small nuclear ribonucleoprotein 200 kDa helicas	SNRNP200	K.TNVALMC*MLR.E	0.78		0.84	0.75		0.84	2	0.795	0.0636396	0.0800498	-0.330973
486	Q9UNM6	PSMD13 26S proteasome non-ATPase regulatory subunit 13	PSMD13	R.FLGC*VDIKDLPVSEQQER.A	1.01	0.62	0.88	0.971154	0.534483	0.88	3	0.795212	0.230352	0.289674	-0.330588
41	P08754	GNAI3 Guanine nucleotide-binding protein G(k) subunit al	GNAI3	K.LFDSIC*NNK.W		1.3	0.47		1.12069	0.47	2	0.795345	0.460107	0.5785	-0.330348
251	Q9NQC3	RTN4 Reticulon-4	RTN4	K.YSNSALGHVNC*TIK.E	0.98	0.82	0.74	0.942308	0.706897	0.74	3	0.796401	0.127438	0.160017	-0.328432
326	Q9NPA8	ENY2 Transcription and mRNA export factor ENY2	ENY2	K.LIEC*GWK.D	0.96	0.79	0.79	0.923077	0.681034	0.79	3	0.798037	0.121221	0.151899	-0.325472
424	Q9Y5M8	SRPRB Signal recognition particle receptor subunit beta	SRPRB	K.NTPSFLIAC*NK.Q	0.79		0.84	0.759615		0.84	2	0.799808	0.0568405	0.0710677	-0.322275
383	Q9H0L4	CSTF2T Cleavage stimulation factor subunit 2 tau variant	CSTF2T	K.LC*VQNSHQEAR.N	0.92	0.81	0.82	0.884615	0.698276	0.82	3	0.800964	0.0946171	0.118129	-0.320191
450	P83731	RPL24 60S ribosomal protein L24	RPL24	K.C*ESAFLSK.R	0.77	0.94	0.86	0.740385	0.810345	0.86	3	0.803576	0.0600942	0.0747835	-0.315493
414	P54136	RARS Arginine--tRNA ligase, cytoplasmic	RARS	K.NC*GCLGASPNLEQLQEENLK.L	0.82	0.91	0.84	0.788462	0.784483	0.84	3	0.804315	0.0309683	0.0385027	-0.314168
593	P29590	PML Protein PML	PML	K.C*YASDQEVLDMHGFLR.Q	0.72		0.92	0.692308		0.92	2	0.806154	0.161003	0.199717	-0.310873
67	Q96SB4	SRPK1 SRSF protein kinase 1	SRPK1	K.SNYQGLPLPC*VK.K	1.14	0.89	0.56	1.09615	0.767241	0.56	3	0.807798	0.270368	0.334697	-0.307933
187	Q8N163	CCAR2 Cell cycle and apoptosis regulator protein 2	CCAR2	R.VVTQNIC*QYR.S	0.95	0.94	0.7	0.913462	0.810345	0.7	3	0.807935	0.106751	0.132128	-0.307688
1509	P35579	MYH9 Myosin-9	MYH9	R.C*NGVLEGIR.I	0.94	0.83		0.903846	0.715517		2	0.809682	0.133169	0.16447	-0.304573
167	P50570	DNM2 Dynamin-2	DNM2	K.TEHAEFLHC*K.S	0.98		0.68	0.942308		0.68	2	0.811154	0.18548	0.228661	-0.301953
399	Q16181	SEPT7 Septin-7	2020-09-07	K.ADTLTPEEC*QQFKK.Q		0.92	0.83		0.793103	0.83	2	0.811552	0.0260898	0.032148	-0.301245
396	P38606	ATP6V1A V-type proton ATPase catalytic subunit A	ATP6V1A	R.VLDALFPCVQGGTTAIPGAFGC*GK.T	0.88	0.88	0.83	0.846154	0.758621	0.83	3	0.811592	0.0465797	0.057393	-0.301174
535	O76075	DFFB DNA fragmentation factor subunit beta	DFFB	R.VLGSMC*QR.L	0.82	0.87	0.9	0.788462	0.75	0.9	3	0.812821	0.0779103	0.0958518	-0.298991
578	P35236	PTPN7 Tyrosine-protein phosphatase non-receptor type 7	PTPN7	R.SLGAVEPIC*SVNTPR.E	0.94	0.72	0.92	0.903846	0.62069	0.92	3	0.814845	0.168338	0.206588	-0.295402
345	Q1KMD3	HNRNPUL2 Heterogeneous nuclear ribonucleoprotein U-like pro	HNRNPUL2	K.SRDLLVQQASQC*LSK.L	0.85	0.96	0.8	0.817308	0.827586	0.8	3	0.814965	0.0139416	0.017107	-0.295191
190	Q04637	EIF4G1 Eukaryotic translation initiation factor 4 gamma 1	EIF4G1	K.MLTEAIMHDC*VVK.L	0.97		0.7	0.932692		0.7	2	0.816346	0.164538	0.201555	-0.292747
185	Q00610	CLTC Clathrin heavy chain 1	CLTC	K.YIQAAC*K.T	1.05	0.86	0.7	1.00962	0.741379	0.7	3	0.816998	0.16809	0.20574	-0.291595
433	Q5T4S7	UBR4 E3 ubiquitin-protein ligase UBR4	UBR4	K.AVQC*LNTSSK.E		0.91	0.85		0.784483	0.85	2	0.817241	0.0463277	0.0566879	-0.291166
579	Q8TDX7	NEK7 Serine/threonine-protein kinase Nek7	NEK7	K.MNLYSLC*K.K		0.83	0.92		0.715517	0.92	2	0.817759	0.144591	0.176814	-0.290253
60	P32322	PYCR1 Pyrroline-5-carboxylate reductase 1, mitochondrial	PYCR1	R.C*MTNTPVVVR.E	1.18	0.91	0.54	1.13462	0.784483	0.54	3	0.819699	0.298868	0.364607	-0.286833
141	P60981	DSTN Destrin	DSTN	K.HECQANGPEDLNRAC*IAEK.L	1.03		0.65	0.990385		0.65	2	0.820192	0.240688	0.293453	-0.285966
191	Q9BQG0	MYBBP1A Myb-binding protein 1A	MYBBP1A	R.HYGEHVC*TAK.L	0.98		0.7	0.942308		0.7	2	0.821154	0.171337	0.208654	-0.284276
154	P26196	DDX6 Probable ATP-dependent RNA helicase DDX6	DDX6	R.NLVC*TDLFTR.G	0.9	1.09	0.66	0.865385	0.939655	0.66	3	0.82168	0.14486	0.176297	-0.283352
448	P35579	MYH9 Myosin-9	MYH9	K.QAC*VLMIK.A		0.91	0.86		0.784483	0.86	2	0.822241	0.0533988	0.0649429	-0.282366
271	P17844	DDX5 Probable ATP-dependent RNA helicase DDX5	DDX5	R.GVEIC*IATPGR.L		1.04	0.75		0.896552	0.75	2	0.823276	0.103628	0.125872	-0.280552
175	P26640	VARS Valine--tRNA ligase	VARS	R.IC*LQPPPTSR.T		1.11	0.69		0.956897	0.69	2	0.823448	0.188724	0.229188	-0.28025
283	Q14232	EIF2B1 Translation initiation factor eIF-2B subunit alpha	EIF2B1	K.IGTNQMAVC*AK.A		1.03	0.76		0.887931	0.76	2	0.823966	0.0904609	0.109787	-0.279344
635	P30519	HMOX2 Heme oxygenase 2	HMOX2	K.GALEGSSC*PFR.T		0.81	0.95		0.698276	0.95	2	0.824138	0.177996	0.215978	-0.279042
462	P27708	CAD CAD protein	CAD	K.VHVDC*MTSQK.L	0.82		0.86	0.788462		0.86	2	0.824231	0.0505853	0.0613728	-0.27888
295	Q9H0W8	SMG9 Protein SMG9	SMG9	R.REDFC*PR.K	0.87	1.01	0.77	0.836538	0.87069	0.77	3	0.825743	0.0512056	0.0620116	-0.276236
385	Q6P2Q9	PRPF8 Pre-mRNA-processing-splicing factor 8	PRPF8	K.FIC*ISDLR.A	0.89	0.93	0.82	0.855769	0.801724	0.82	3	0.825831	0.0274904	0.0332881	-0.276081
449	P05141	SLC25A5 ADP/ATP translocase 2	SLC25A5	R.GLGDC*LVK.I		0.92	0.86		0.793103	0.86	2	0.826552	0.047303	0.0572293	-0.274823
336	P40937	RFC5 Replication factor C subunit 5	RFC5	K.VTEETVYTC*TGHPLK.S	0.9		0.79	0.865385		0.79	2	0.827692	0.053305	0.0644019	-0.272834
121	P28288	ABCD3 ATP-binding cassette sub-family D member 3	ABCD3	R.SGANVLIC*GPNGCGK.S		1.19	0.63		1.02586	0.63	2	0.827931	0.279917	0.338092	-0.272417
432	Q9UL40	ZNF346 Zinc finger protein 346	ZNF346	K.NQC*LFTNTQCK.V	0.93	0.86	0.85	0.894231	0.741379	0.85	3	0.828537	0.0786537	0.0949308	-0.271363
255	Q14974	KPNB1 Importin subunit beta-1	KPNB1	K.NSAKDC*YPAVQK.T	0.96	0.96	0.74	0.923077	0.827586	0.74	3	0.830221	0.0915669	0.110292	-0.268433
331	Q08211	DHX9 ATP-dependent RNA helicase A	DHX9	K.LAAQSC*ALSLVR.Q	0.91	0.96	0.79	0.875	0.827586	0.79	3	0.830862	0.0425946	0.0512655	-0.267319
489	O95602	POLR1A DNA-directed RNA polymerase I subunit RPA1	POLR1A	R.SPSAC*LVVGK.V		0.91	0.88		0.784483	0.88	2	0.832241	0.0675409	0.0811554	-0.264926
355	Q12962	TAF10 Transcription initiation factor TFIID subunit 10	TAF10	K.FISDIANDALQHC*K.M	0.9		0.8	0.865385		0.8	2	0.832692	0.0462339	0.0555234	-0.264145
490	P22695	UQCRC2 Cytochrome b-c1 complex subunit 2, mitochondrial	UQCRC2	R.NALANPLYC*PDYR.I	0.76	1.03	0.88	0.730769	0.887931	0.88	3	0.8329	0.0885368	0.106299	-0.263785
477	O43264	ZW10 Centromere/kinetochore protein zw10 homolog	ZW10	R.LAPILC*DGTATFVDLVPGFR.R	0.83		0.87	0.798077		0.87	2	0.834038	0.0508573	0.0609772	-0.261814
478	P04183	TK1 Thymidine kinase, cytosolic	TK1	R.YSSSFC*THDR.N	0.83		0.87	0.798077		0.87	2	0.834038	0.0508573	0.0609772	-0.261814
155	Q9P258	RCC2 Protein RCC2	RCC2	K.GNLYSFGC*PEYGQLGHNSDGK.F		1.17	0.66		1.00862	0.66	2	0.83431	0.246512	0.295468	-0.261344
568	P11586	MTHFD1 C-1-tetrahydrofolate synthase, cytoplasmic	MTHFD1	K.QGFGNLPIC*MAK.T	0.85	0.9	0.91	0.817308	0.775862	0.91	3	0.83439	0.0686811	0.082313	-0.261206
349	Q6UX07	DHRS13 Dehydrogenase/reductase SDR family member 13	DHRS13	R.VVVVASAAHC*R.G	0.78	1.11	0.8	0.75	0.956897	0.8	3	0.835632	0.107953	0.129187	-0.25906
602	Q01518	CAP1 Adenylyl cyclase-associated protein 1	CAP1	K.GKINSITVDNC*KK.L		0.86	0.93		0.741379	0.93	2	0.83569	0.133375	0.159599	-0.258961
447	O00410	IPO5 Importin-5	IPO5	K.KVC*DIAAELAR.N	1.05	0.74	0.86	1.00962	0.637931	0.86	3	0.835849	0.187015	0.223743	-0.258686
281	P48643	CCT5 T-complex protein 1 subunit epsilon	CCT5	K.EMNPALGIDC*LHK.G	1.02	0.89	0.76	0.980769	0.767241	0.76	3	0.836004	0.125423	0.150027	-0.258419
274	P05141	SLC25A5 ADP/ATP translocase 2	SLC25A5	K.GTDIMYTGTLDC*WR.K	0.96		0.75	0.923077		0.75	2	0.836538	0.122384	0.146298	-0.257496
741	O75600	GCAT 2-amino-3-ketobutyrate coenzyme A ligase, mitochon	GCAT	R.FIC*GTQSIHK.N	0.7		1	0.673077		1	2	0.836538	0.23117	0.276341	-0.257496
376	Q9UEW8	STK39 STE20/SPS1-related proline-alanine-rich protein ki	STK39	K.LLSLC*LQK.D	0.9		0.81	0.865385		0.81	2	0.837692	0.0391628	0.0467509	-0.255508
467	Q53H96	PYCR3 Pyrroline-5-carboxylate reductase 3	PYCR3	R.SDVC*TPGGTTIYGLHALEQGGLR.A	0.92	0.88	0.87	0.884615	0.758621	0.87	3	0.837745	0.0689125	0.0822595	-0.255416
495	Q9Y5M8	SRPRB Signal recognition particle receptor subunit beta	SRPRB	R.AVLLVGLC*DSGK.T	0.74	1.07	0.88	0.711538	0.922414	0.88	3	0.837984	0.11154	0.133105	-0.255005
434	P10644	PRKAR1A cAMP-dependent protein kinase type I-alpha regulat	PRKAR1A	R.SLREC*ELYVQK.H	0.87	0.96	0.85	0.836538	0.827586	0.85	3	0.838042	0.0112822	0.0134626	-0.254906
616	Q14919	DRAP1 Dr1-associated corepressor	DRAP1	K.KAC*QVTQSR.N	0.92	0.8	0.94	0.884615	0.689655	0.94	3	0.83809	0.131497	0.156901	-0.254823
415	Q8WV74	NUDT8 Nucleoside diphosphate-linked moiety X motif 8	NUDT8	K.QPLASPC*QASSTPGLNK.G		0.97	0.84		0.836207	0.84	2	0.838103	0.00268213	0.00320024	-0.2548
333	P49368	CCT3 T-complex protein 1 subunit gamma	CCT3	R.NLQDAMQVC*R.N		1.03	0.79		0.887931	0.79	2	0.838966	0.0692477	0.0825394	-0.253317
206	P17844	DDX5 Probable ATP-dependent RNA helicase DDX5	DDX5	R.GDGPIC*LVLAPTR.E	0.92	1.07	0.71	0.884615	0.922414	0.71	3	0.83901	0.113313	0.135056	-0.253241
558	O00148	DDX39A ATP-dependent RNA helicase DDX39A	DDX39A	R.AIVDCGFEHPSEVQHEC*IPQAILGMDVLCQAK.S	0.81		0.9	0.778846		0.9	2	0.839423	0.0856687	0.102057	-0.25253
805	Q86VP6	CAND1 Cullin-associated NEDD8-dissociated protein 1	CAND1	K.DLFTC*TIKR.L	0.83	0.79	1.04	0.798077	0.681034	1.04	3	0.839704	0.183067	0.218014	-0.252048
328	Q00325	SLC25A3 Phosphate carrier protein, mitochondrial	SLC25A3	K.FAC*FER.T	1.03	0.86	0.79	0.990385	0.741379	0.79	3	0.840588	0.131986	0.157016	-0.250529
279	P61978	HNRNPK Heterogeneous nuclear ribonucleoprotein K	HNRNPK	K.LFQEC*CPHSTDR.V	1.1	0.82	0.76	1.05769	0.706897	0.76	3	0.84153	0.189076	0.224681	-0.248914
256	P49368	CCT3 T-complex protein 1 subunit gamma	CCT3	K.IPGGIIEDSC*VLR.G	0.97	0.99	0.74	0.932692	0.853448	0.74	3	0.842047	0.0968508	0.115018	-0.248028
519	Q9BVP2	GNL3 Guanine nucleotide-binding protein-like 3	GNL3	K.KLYC*QELK.K	0.86	0.94	0.89	0.826923	0.810345	0.89	3	0.842423	0.0420287	0.0498903	-0.247384
518	P16455	MGMT Methylated-DNA--protein-cysteine methyltransferase	MGMT	R.VVC*SSGAVGNYSGGLAVK.E	0.96	0.83	0.89	0.923077	0.715517	0.89	3	0.842865	0.111519	0.13231	-0.246627
676	P53618	COPB1 Coatomer subunit beta	COPB1	K.KPITDDDVDRISLC*LK.V	1.03	0.66	0.97	0.990385	0.568966	0.97	3	0.843117	0.237641	0.28186	-0.246196
537	Q14344	GNA13 Guanine nucleotide-binding protein subunit alpha-1	GNA13	K.SKEIDKC*LSR.E	0.87	0.92	0.9	0.836538	0.793103	0.9	3	0.843214	0.05376	0.0637561	-0.246029
136	Q9NPD3	EXOSC4 Exosome complex component RRP41	EXOSC4	K.SC*EMGLQLR.Q	0.91	1.18	0.64	0.875	1.01724	0.64	3	0.84408	0.190512	0.225703	-0.244548
436	P49411	TUFM Elongation factor Tu, mitochondrial	TUFM	K.NMITGTAPLDGC*ILVVAANDGPMPQTR.E	0.82	1.04	0.85	0.788462	0.896552	0.85	3	0.845004	0.054218	0.0641629	-0.242969
367	O00303	EIF3F Eukaryotic translation initiation factor 3 subunit	EIF3F	K.TC*FSPNR.V	0.97	0.92	0.81	0.932692	0.793103	0.81	3	0.845265	0.0761839	0.0901302	-0.242524
307	O75533	SF3B1 Splicing factor 3B subunit 1	SF3B1	K.VQENC*IDLVGR.I	1.02	0.9	0.78	0.980769	0.775862	0.78	3	0.845544	0.117127	0.138523	-0.242049
491	P37198	NUP62 Nuclear pore glycoprotein p62	NUP62	R.KVEEVTKVC*EGR.R	0.8	1.03	0.88	0.769231	0.887931	0.88	3	0.845721	0.0663607	0.0784665	-0.241747
312	P49327	FASN Fatty acid synthase	FASN	R.LGMLSPEGTC*K.A		1.06	0.78		0.913793	0.78	2	0.846897	0.094606	0.111709	-0.239742
377	P43243	MATR3 Matrin-3	MATR3	R.EDAMAMVDHC*LKK.A	0.92		0.81	0.884615		0.81	2	0.847308	0.052761	0.062269	-0.239042
402	Q9UJX3	ANAPC7 Anaphase-promoting complex subunit 7	ANAPC7	R.NALANQSDC*VLHR.I	0.9		0.83	0.865385		0.83	2	0.847692	0.0250207	0.0295163	-0.238387
425	Q6P2E9	EDC4 Enhancer of mRNA-decapping protein 4	EDC4	K.GHSTC*LSEGALSPDGTVLATASHDGYVK.F	0.89		0.84	0.855769		0.84	2	0.847885	0.0111505	0.013151	-0.23806
347	Q9P2X0	DPM3 Dolichol-phosphate mannosyltransferase subunit 3	DPM3	R.VATFHDC*EDAAR.E		1.04	0.8		0.896552	0.8	2	0.848276	0.0682724	0.0804837	-0.237395
686	Q00839	HNRNPU Heterogeneous nuclear ribonucleoprotein U	HNRNPU	K.MC*LFAGFQR.K	0.76		0.97	0.730769		0.97	2	0.850385	0.169162	0.198924	-0.233813
311	P55060	CSE1L Exportin-2	CSE1L	K.IC*AVGITK.L	0.92	1.03	0.78	0.884615	0.887931	0.78	3	0.850849	0.0613793	0.0721389	-0.233025
694	P29590	PML Protein PML	PML	R.LQDLSSC*ITQGK.D		0.84	0.98		0.724138	0.98	2	0.852069	0.180922	0.212332	-0.230958
916	O00148	DDX39A ATP-dependent RNA helicase DDX39A	DDX39A	K.QC*MMFSATLSK.D	0.65		1.08	0.625		1.08	2	0.8525	0.321734	0.3774	-0.230228
426	Q01780	EXOSC10 Exosome component 10	EXOSC10	R.VMQYHGC*R.S	0.9		0.84	0.865385		0.84	2	0.852692	0.0179496	0.0210505	-0.229903
435	P24752	ACAT1 Acetyl-CoA acetyltransferase, mitochondrial	ACAT1	K.QGEYGLASIC*NGGGGASAMLIQK.L	0.9	0.98	0.85	0.865385	0.844828	0.85	3	0.853404	0.0106929	0.0125297	-0.228699
807	Q9BVP2	GNL3 Guanine nucleotide-binding protein-like 3	GNL3	R.C*PQVEEAIVQSGQK.K	0.66	1.03	1.04	0.634615	0.887931	1.04	3	0.854182	0.204789	0.239748	-0.227384
594	Q9H081	MIS12 Protein MIS12 homolog	MIS12	R.IPSNILLPEDKC*K.E	0.82		0.92	0.788462		0.92	2	0.854231	0.0930117	0.108884	-0.227302
350	P30044	PRDX5 Peroxiredoxin-5, mitochondrial	PRDX5	K.ALNVEPDGTGLTC*SLAPNIISQL.-	0.83	1.12	0.8	0.798077	0.965517	0.8	3	0.854531	0.0961214	0.112484	-0.226795
207	P31146	CORO1A Coronin-1A	CORO1A	K.RGLEVNKC*EIAR.F	1.04		0.71	1		0.71	2	0.855	0.205061	0.239837	-0.226004
310	Q9NTJ3	SMC4 Structural maintenance of chromosomes protein 4	SMC4	R.FSC*IIGPNGSGK.S	0.96	1	0.78	0.923077	0.862069	0.78	3	0.855049	0.0717963	0.0839676	-0.225922
536	Q96QR8	PURB Transcriptional activator protein Pur-beta	PURB	K.FGGAFC*R.Y	0.92	0.91	0.9	0.884615	0.784483	0.9	3	0.856366	0.0627262	0.073247	-0.2237
474	P18074	ERCC2 TFIIH basal transcription factor complex helicase	ERCC2	R.HAAQC*VGR.A	0.73	1.16	0.87	0.701923	1	0.87	3	0.857308	0.149443	0.174317	-0.222115
636	P21333	FLNA Filamin-A	FLNA	R.TPC*EEILVK.H		0.89	0.95		0.767241	0.95	2	0.858621	0.12923	0.150509	-0.219907
222	P49368	CCT3 T-complex protein 1 subunit gamma	CCT3	R.AKHTQENC*ETWGVNGETGTLVDMK.E	1.04		0.72	1		0.72	2	0.86	0.19799	0.230221	-0.217591
294	P20226	TBP TATA-box-binding protein	TBP	K.MVC*TGAK.S	1.04	0.94	0.77	1	0.810345	0.77	3	0.860115	0.122812	0.142786	-0.217399
287	P37108	SRP14 Signal recognition particle 14 kDa protein	SRP14	K.KGTVEGFEPADNKC*LLR.A	1		0.76	0.961538		0.76	2	0.860769	0.142509	0.16556	-0.216302
308	P07900	HSP90AA1 Heat shock protein HSP 90-alpha	HSP90AA1	K.KTKFENLC*K.I	1.07	0.9	0.78	1.02885	0.775862	0.78	3	0.861569	0.144881	0.168159	-0.214961
855	P15153	RAC2 Ras-related C3 botulinum toxin substrate 2	RAC2	R.AVLC*PQPTR.Q	0.61	1.09	1.06	0.586538	0.939655	1.06	3	0.862065	0.246083	0.285457	-0.214132
438	Q63HN8	RNF213 E3 ubiquitin-protein ligase RNF213	RNF213	K.LHEAIC*SSTK.L	0.91		0.85	0.875		0.85	2	0.8625	0.0176777	0.0204958	-0.213404
949	P24928	POLR2A DNA-directed RNA polymerase II subunit RPB1	POLR2A	R.HMC*DGDIVIFNR.Q	0.65		1.1	0.625		1.1	2	0.8625	0.335876	0.389421	-0.213404
1507	Q9UHD8	SEPT9 Septin-9	2020-09-09	K.LTVIDTPGFGDHINNENC*WQPIMK.F	1.06	0.82		1.01923	0.706897		2	0.863064	0.220854	0.255895	-0.212461
606	P61163	ACTR1A Alpha-centractin	ACTR1A	R.AC*YLSINPQKDETLETEK.A	0.75	1.09	0.93	0.721154	0.939655	0.93	3	0.863603	0.123459	0.142958	-0.21156
538	Q01518	CAP1 Adenylyl cyclase-associated protein 1	CAP1	R.ALLVTASQC*QQPAENK.L		0.96	0.9		0.827586	0.9	2	0.863793	0.0512043	0.0592784	-0.211242
284	P49792	RANBP2 E3 SUMO-protein ligase RanBP2	RANBP2	K.MIC*QQVEAIKK.E	0.91	1.11	0.76	0.875	0.956897	0.76	3	0.863966	0.098911	0.114485	-0.210954
1073	P07814	EPRS Bifunctional glutamate/proline--tRNA ligase	EPRS	K.LSSC*DSFTSTINELNHCLSLR.T	0.56		1.19	0.538462		1.19	2	0.864231	0.460707	0.533084	-0.210511
730	Q5JTH9	RRP12 RRP12-like protein	RRP12	R.VTVC*QALR.T	0.94	0.8	1	0.903846	0.689655	1	3	0.8645	0.15887	0.18377	-0.210061
188	Q9Y2Q3	GSTK1 Glutathione S-transferase kappa 1	GSTK1	K.NQLKETTEAAC*R.Y	1.1	0.97	0.7	1.05769	0.836207	0.7	3	0.864633	0.180532	0.208797	-0.20984
453	P68363	TUBA1B Tubulin alpha-1B chain	TUBA1B	R.AVC*MLSNTTAIAEAWAR.L	0.89	1.02	0.86	0.855769	0.87931	0.86	3	0.865027	0.0125497	0.0145079	-0.209184
189	P16615	ATP2A2 Sarcoplasmic/endoplasmic reticulum calcium ATPase	ATP2A2	R.ANAC*NSVIK.Q	0.94	1.15	0.7	0.903846	0.991379	0.7	3	0.865075	0.149509	0.172827	-0.209103
452	O00410	IPO5 Importin-5	IPO5	K.LC*GDTSLNNMQR.Q		1.01	0.86		0.87069	0.86	2	0.865345	0.00755873	0.00873493	-0.208653
97	P46060	RANGAP1 Ran GTPase-activating protein 1	RANGAP1	K.LNNC*GMGIGGGK.I	1.01	1.19	0.6	0.971154	1.02586	0.6	3	0.865672	0.231699	0.267652	-0.208108
520	Q9UBE0	SAE1 SUMO-activating enzyme subunit 1	SAE1	R.YCFSEMAPVC*AVVGGILAQEIVK.A	0.88	1	0.89	0.846154	0.862069	0.89	3	0.866074	0.0221958	0.025628	-0.207437
427	Q14690	PDCD11 Protein RRP5 homolog	PDCD11	R.ALEC*LPSKEHVDVIAK.F	0.93		0.84	0.894231		0.84	2	0.867115	0.0383469	0.0442236	-0.205704
428	Q8WUM4	PDCD6IP Programmed cell death 6-interacting protein	PDCD6IP	K.LANQAADYFGDAFKQC*QYKDTLPK.E	0.93		0.84	0.894231		0.84	2	0.867115	0.0383469	0.0442236	-0.205704
637	P18621	RPL17 60S ribosomal protein L17	RPL17	R.YSLDPENPTKSC*K.S		0.91	0.95		0.784483	0.95	2	0.867241	0.117038	0.134955	-0.205495
269	O00567	NOP56 Nucleolar protein 56	NOP56	K.GLTDLSAC*K.A	1.11	0.91	0.75	1.06731	0.784483	0.75	3	0.867263	0.174099	0.200745	-0.205458
98	Q9NVI1	FANCI Fanconi anemia group I protein	FANCI	K.GVLSGEEC*KK.Q	0.8	1.43	0.6	0.769231	1.23276	0.6	3	0.86733	0.327587	0.377696	-0.205347
138	P17844	DDX5 Probable ATP-dependent RNA helicase DDX5	DDX5	K.RRC*DELTR.K	1.14		0.64	1.09615		0.64	2	0.868077	0.322549	0.371568	-0.204105
677	Q9UBS0	RPS6KB2 Ribosomal protein S6 kinase beta-2	RPS6KB2	R.VDPPFRPC*LQSEEDVSQFDTR.F		0.89	0.97		0.767241	0.97	2	0.868621	0.143372	0.165057	-0.203202
416	P83731	RPL24 60S ribosomal protein L24	RPL24	-.MKVELC*SFSGYK.I	0.94	1	0.84	0.903846	0.862069	0.84	3	0.868638	0.0324261	0.0373298	-0.203172
540	Q9BQE3	TUBA1C Tubulin alpha-1C chain	TUBA1C	R.AVC*MLSNTTAVAEAWAR.L	0.88	1	0.9	0.846154	0.862069	0.9	3	0.869408	0.027663	0.0318183	-0.201895
669	B0I1T2	MYO1G Unconventional myosin-Ig	MYO1G	R.VGELVGVLAAHC*QGEGR.T	0.81		0.96	0.778846		0.96	2	0.869423	0.128095	0.147333	-0.20187
204	P49736	MCM2 DNA replication licensing factor MCM2	MCM2	R.TSGVVTSC*TGVLPQLSMVK.Y	1.06	1.02	0.71	1.01923	0.87931	0.71	3	0.869514	0.154848	0.178086	-0.201719
151	Q9NRZ9	HELLS Lymphoid-specific helicase	HELLS	K.C*NGQPVPFQQPK.H	1.13	1	0.66	1.08654	0.862069	0.66	3	0.869536	0.213367	0.245381	-0.201683
953	Q9UBU9	NXF1 Nuclear RNA export factor 1	NXF1	R.SC*MAATLR.I		0.73	1.11		0.62931	1.11	2	0.869655	0.339899	0.390843	-0.201485
456	Q6YP21	KYAT3 Kynurenine--oxoglutarate transaminase 3	KYAT3	K.RMDDPEC*YFNSLPK.E	0.87	1.06	0.86	0.836538	0.913793	0.86	3	0.870111	0.0396073	0.0455198	-0.200729
403	P27361	MAPK3 Mitogen-activated protein kinase 3	MAPK3	K.ISPFEHQTYC*QR.T	0.95		0.83	0.913462		0.83	2	0.871731	0.0590162	0.0677001	-0.198045
166	Q9Y5L0	TNPO3 Transportin-3	TNPO3	K.GLC*EKPLASAAAK.A	0.84	1.31	0.68	0.807692	1.12931	0.68	3	0.872334	0.231525	0.265409	-0.197047
541	P17844	DDX5 Probable ATP-dependent RNA helicase DDX5	DDX5	R.LIDFLEC*GK.T	0.89	1	0.9	0.855769	0.862069	0.9	3	0.872613	0.0239263	0.0274192	-0.196587
457	Q1KMD3	HNRNPUL2 Heterogeneous nuclear ribonucleoprotein U-like pro	HNRNPUL2	K.VTQNLPMKEGC*TEVSLLR.V	0.88	1.06	0.86	0.846154	0.913793	0.86	3	0.873316	0.0357316	0.0409149	-0.195425
180	O15372	EIF3H Eukaryotic translation initiation factor 3 subunit	EIF3H	K.LMEVC*KEKDFSPEALKK.A	1.1		0.69	1.05769		0.69	2	0.873846	0.259998	0.297533	-0.194549
217	Q02978	SLC25A11 Mitochondrial 2-oxoglutarate/malate carrier protei	SLC25A11	R.GC*IPTMAR.A	1.11	0.97	0.72	1.06731	0.836207	0.72	3	0.874505	0.176793	0.202163	-0.193462
705	Q9NR30	DDX21 Nucleolar RNA helicase 2	DDX21	R.TIIFC*ETKK.E	0.8		0.98	0.769231		0.98	2	0.874615	0.149036	0.170402	-0.193279
318	P10398	ARAF Serine/threonine-protein kinase A-Raf	ARAF	K.ISSNC*PK.A	1.01		0.78	0.971154		0.78	2	0.875577	0.135166	0.154374	-0.191694
581	O14980	XPO1 Exportin-1	XPO1	K.LDINLLDNVVNC*LYHGEGAQQR.M	0.88	1	0.92	0.846154	0.862069	0.92	3	0.876074	0.0388642	0.0443617	-0.190875
469	P11388	TOP2A DNA topoisomerase 2-alpha	TOP2A	K.LC*NIFSTK.F	0.96	0.97	0.87	0.923077	0.836207	0.87	3	0.876428	0.0437903	0.0499645	-0.190293
314	O14980	XPO1 Exportin-1	XPO1	R.NQC*EGIKK.Y	0.94	1.1	0.78	0.903846	0.948276	0.78	3	0.877374	0.0872053	0.0993936	-0.188736
174	P06239	LCK Tyrosine-protein kinase Lck	LCK	R.HYTNASDGLC*TR.L	1.16	0.96	0.69	1.11538	0.827586	0.69	3	0.877657	0.217068	0.247326	-0.188271
530	P56182	RRP1 Ribosomal RNA processing protein 1 homolog A	RRP1	K.LQDLAGGIFPEDEIPEKAC*R.R	0.9		0.89	0.865385		0.89	2	0.877692	0.0174057	0.0198312	-0.188213
619	P46782	RPS5 40S ribosomal protein S5	RPS5	K.AQC*PIVER.L	0.82	1.05	0.94	0.788462	0.905172	0.94	3	0.877878	0.0793707	0.0904121	-0.187908
455	P05388	RPLP0 60S acidic ribosomal protein P0	RPLP0	K.C*FIVGADNVGSK.Q	0.91	1.05	0.86	0.875	0.905172	0.86	3	0.880057	0.023007	0.0261426	-0.18433
301	P78527	PRKDC DNA-dependent protein kinase catalytic subunit	PRKDC	R.APPC*EYKDWLTK.M	1.03		0.77	0.990385		0.77	2	0.880192	0.155835	0.177047	-0.184109
782	Q15027	ACAP1 Arf-GAP with coiled-coil, ANK repeat and PH domain	ACAP1	R.LGPPEPMMAEC*LEK.F	0.77		1.02	0.740385		1.02	2	0.880192	0.197718	0.22463	-0.184109
272	Q99832	CCT7 T-complex protein 1 subunit eta	CCT7	K.TC*TFILR.G	0.98	1.1	0.75	0.942308	0.948276	0.75	3	0.880195	0.112791	0.128144	-0.184106
546	Q71U36	TUBA1A Tubulin alpha-1A chain	TUBA1A	R.TIQFVDWC*PTGFK.V	0.89	1.03	0.9	0.855769	0.887931	0.9	3	0.881233	0.0228634	0.0259447	-0.182404
678	O15228	GNPAT Dihydroxyacetone phosphate acyltransferase	GNPAT	K.C*YTPLVYK.G		0.92	0.97		0.793103	0.97	2	0.881552	0.125085	0.141892	-0.181883
417	P11413	G6PD Glucose-6-phosphate 1-dehydrogenase	G6PD	R.TQVC*GILR.E	0.9	1.09	0.84	0.865385	0.939655	0.84	3	0.88168	0.0517875	0.0587373	-0.181673
714	P53618	COPB1 Coatomer subunit beta	COPB1	R.C*IYNLLQSSSPAVK.Y	0.87	0.95	0.99	0.836538	0.818966	0.99	3	0.881835	0.0940851	0.106692	-0.18142
1050	P13639	EEF2 Elongation factor 2	EEF2	K.STLTDSLVC*K.A	0.7	0.92	1.18	0.673077	0.793103	1.18	3	0.88206	0.264911	0.300332	-0.181051
580	Q96SZ5	ADO 2-aminoethanethiol dioxygenase	ADO	R.QAC*LTFR.G		0.98	0.92		0.844828	0.92	2	0.882414	0.0531549	0.0602381	-0.180473
472	Q9BQ70	TCF25 Transcription factor 25	TCF25	R.SGC*ALTDAVAPGNK.G		1.04	0.87		0.896552	0.87	2	0.883276	0.0187749	0.021256	-0.179064
687	Q13838	DDX39B Spliceosome RNA helicase DDX39B	DDX39B	K.HFILDEC*DK.M	0.83		0.97	0.798077		0.97	2	0.884038	0.121568	0.137514	-0.177819
492	P68363	TUBA1B Tubulin alpha-1B chain	TUBA1B	K.RSIQFVDWC*PTGFK.V	0.92	1.03	0.88	0.884615	0.887931	0.88	3	0.884182	0.00398323	0.00450499	-0.177585
286	Q14566	MCM6 DNA replication licensing factor MCM6	MCM6	K.YTQPNIC*R.N		1.17	0.76		1.00862	0.76	2	0.88431	0.175801	0.198801	-0.177375
680	P61158	ACTR3 Actin-related protein 3	ACTR3	R.LPACVVDC*GTGYTK.L	0.89	0.96	0.97	0.855769	0.827586	0.97	3	0.884452	0.0754151	0.0852676	-0.177145
400	P63010	AP2B1 AP-2 complex subunit beta	AP2B1	K.ITEYLC*EPLRK.C	0.74	1.29	0.83	0.711538	1.11207	0.83	3	0.884536	0.205759	0.232618	-0.177008
544	P24752	ACAT1 Acetyl-CoA acetyltransferase, mitochondrial	ACAT1	K.DGLTDVYNKIHMGSC*AENTAK.K	0.92	1.01	0.9	0.884615	0.87069	0.9	3	0.885102	0.0146612	0.0165644	-0.176085
545	Q15052	ARHGEF6 Rho guanine nucleotide exchange factor 6	ARHGEF6	K.KTIC*DPEEFLK.S		1.01	0.9		0.87069	0.9	2	0.885345	0.0207255	0.0234096	-0.175689
337	P12235	SLC25A4 ADP/ATP translocase 1	SLC25A4	R.KGADIMYTGTVDC*WR.K	1.02		0.79	0.980769		0.79	2	0.885385	0.134894	0.152357	-0.175624
851	O95336	PGLS 6-phosphogluconolactonase	PGLS	R.AAC*CLAGAR.A	0.88	0.87	1.06	0.846154	0.75	1.06	3	0.885385	0.15868	0.179221	-0.175624
543	P37268	FDFT1 Squalene synthase	FDFT1	R.TQNLPNC*QLISR.S	0.93	1	0.9	0.894231	0.862069	0.9	3	0.885433	0.0204386	0.0230832	-0.175545
542	P62829	RPL23 60S ribosomal protein L23	RPL23	R.ISLGLPVGAVINC*ADNTGAK.N	0.93	1	0.9	0.894231	0.862069	0.9	3	0.885433	0.0204386	0.0230832	-0.175545
156	Q96F63	CCDC97 Coiled-coil domain-containing protein 97	CCDC97	R.LPVC*SQQQGEPDLTEHEK.V		1.29	0.66		1.11207	0.66	2	0.886034	0.319661	0.360777	-0.174565
404	Q06323	PSME1 Proteasome activator complex subunit 1	PSME1	K.GEDEDKGPPC*GPVNC*NEK.I	0.98		0.83	0.942308		0.83	2	0.886154	0.0794135	0.089616	-0.174371
852	Q99439	CNN2 Calponin-2	CNN2	K.C*ASQVGMTAPGTR.R	0.84	0.92	1.06	0.807692	0.793103	1.06	3	0.886932	0.150059	0.169189	-0.173105
595	O75925	PIAS1 E3 SUMO-protein ligase PIAS1	PIAS1	R.VSLLC*PLGK.M	0.89		0.92	0.855769		0.92	2	0.887885	0.045418	0.0511531	-0.171556
617	P62195	PSMC5 26S proteasome regulatory subunit 8	PSMC5	K.FVVDVDKNIDINDVTPNC*R.V		0.97	0.94		0.836207	0.94	2	0.888103	0.0733928	0.0826399	-0.1712
659	Q9BPW8	NIPSNAP1 Protein NipSnap homolog 1	NIPSNAP1	R.FSGGYPALMDC*MNK.L	0.78	1.11	0.96	0.75	0.956897	0.96	3	0.888966	0.120358	0.135391	-0.169801
539	Q96RU3	FNBP1 Formin-binding protein 1	FNBP1	K.KNSKEEEEYKYTSC*K.A	0.96	0.98	0.9	0.923077	0.844828	0.9	3	0.889302	0.0402068	0.0452116	-0.169255
655	O00571	DDX3X ATP-dependent RNA helicase DDX3X	DDX3X	K.IGLDFC*K.Y		0.95	0.96		0.818966	0.96	2	0.889483	0.0997264	0.112117	-0.168961
582	Q9BSD7	NTPCR Cancer-related nucleoside-triphosphatase	NTPCR	R.NADC*SSGPGQR.V		1	0.92		0.862069	0.92	2	0.891034	0.0409634	0.0459729	-0.166447
1502	O60610	DIAPH1 Protein diaphanous homolog 1	DIAPH1	R.DMPLLSC*LESLR.V	1.19	0.74		1.14423	0.637931		2	0.891081	0.358008	0.401768	-0.166372
639	Q99873	PRMT1 Protein arginine N-methyltransferase 1	PRMT1	K.VIGIEC*SSISDYAVK.I	0.87	1.03	0.95	0.836538	0.887931	0.95	3	0.89149	0.0568144	0.0637298	-0.16571
653	Q04726	TLE3 Transducin-like enhancer protein 3	TLE3	K.SPISQLDC*LNR.D	1.01	0.87	0.96	0.971154	0.75	0.96	3	0.893718	0.124588	0.139404	-0.162108
620	P36507	MAP2K2 Dual specificity mitogen-activated protein kinase	MAP2K2	K.C*LIKNPAER.A	0.87	1.05	0.94	0.836538	0.905172	0.94	3	0.893904	0.0526432	0.0588914	-0.161809
547	P20073	ANXA7 Annexin A7	ANXA7	R.C*YQSEFGR.D		1.03	0.9		0.887931	0.9	2	0.893966	0.00853405	0.00954628	-0.161709
313	P22102	GART Trifunctional purine biosynthetic protein adenosin	GART	R.SAGVQC*FGPTAEAAQLESSKR.F	1.01	1.08	0.78	0.971154	0.931034	0.78	3	0.894063	0.100797	0.112741	-0.161552
788	P52566	ARHGDIB Rho GDP-dissociation inhibitor 2	ARHGDIB	R.LTLVC*ESAPGPITMDLTGDLEALKK.E		0.88	1.03		0.758621	1.03	2	0.89431	0.191894	0.214572	-0.161153
219	P62244	RPS15A 40S ribosomal protein S15a	RPS15A	K.C*GVISPR.F	1.02	1.14	0.72	0.980769	0.982759	0.72	3	0.894509	0.151133	0.168956	-0.160832
488	O00410	IPO5 Importin-5	IPO5	R.MLVQC*MQDQEHPSIR.T	1.06	0.91	0.88	1.01923	0.784483	0.88	3	0.894571	0.11805	0.131963	-0.160732
994	P63010	AP2B1 AP-2 complex subunit beta	AP2B1	K.C*LKDEDPYVR.K	0.9	0.79	1.14	0.865385	0.681034	1.14	3	0.895473	0.230957	0.257917	-0.159278
405	Q8N2W9	PIAS4 E3 SUMO-protein ligase PIAS4	PIAS4	R.VSLIC*PLVK.M	1		0.83	0.961538		0.83	2	0.895769	0.0930117	0.103834	-0.158801
605	P25788	PSMA3 Proteasome subunit alpha type-3	PSMA3	R.C*KDGVVFGVEK.L		1	0.93		0.862069	0.93	2	0.896034	0.0480345	0.0536079	-0.158374
654	Q14684	RRP1B Ribosomal RNA processing protein 1 homolog B	RRP1B	K.AGPGSLELC*GLPSQK.T	1.01	0.88	0.96	0.971154	0.758621	0.96	3	0.896592	0.119616	0.133412	-0.157477
454	Q99832	CCT7 T-complex protein 1 subunit eta	CCT7	K.C*AMTALSSK.L	0.99	1.02	0.86	0.951923	0.87931	0.86	3	0.897078	0.0484688	0.0540297	-0.156695
679	P23396	RPS3 40S ribosomal protein S3	RPS3	R.GLC*AIAQAESLR.Y	0.94	0.95	0.97	0.903846	0.818966	0.97	3	0.897604	0.0757105	0.0843473	-0.155849
368	Q9Y5B9	SUPT16H FACT complex subunit SPT16	SUPT16H	R.INFYC*PGSALGR.N	1.09	0.97	0.81	1.04808	0.836207	0.81	3	0.898095	0.130548	0.145361	-0.155061
622	P16615	ATP2A2 Sarcoplasmic/endoplasmic reticulum calcium ATPase	ATP2A2	R.NYLEPGKEC*VQPATK.S	0.86	1.08	0.94	0.826923	0.931034	0.94	3	0.899319	0.0628569	0.0698939	-0.153095
302	Q8TDX7	NEK7 Serine/threonine-protein kinase Nek7	NEK7	K.KIEQC*DYPPLPSDHYSEELR.Q	1.07		0.77	1.02885		0.77	2	0.899423	0.183032	0.203499	-0.152928
971	O15091	KIAA0391 Mitochondrial ribonuclease P protein 3	KIAA0391	R.DHKAC*LPDAK.T	0.8	0.94	1.12	0.769231	0.810345	1.12	3	0.899859	0.191753	0.213093	-0.15223
496	O00161	SNAP23 Synaptosomal-associated protein 23	SNAP23	K.CCGLCVCPC*NR.T		1.07	0.88		0.922414	0.88	2	0.901207	0.0299911	0.0332788	-0.15007
282	P55060	CSE1L Exportin-2	CSE1L	R.AAC*DLVR.G	1.21	0.91	0.76	1.16346	0.784483	0.76	3	0.902648	0.226203	0.250599	-0.147764
524	Q00839	HNRNPU Heterogeneous nuclear ribonucleoprotein U	HNRNPU	K.AVVVC*PK.D	0.86	1.15	0.89	0.826923	0.991379	0.89	3	0.902767	0.0829682	0.0919043	-0.147574
997	P52564	MAP2K6 Dual specificity mitogen-activated protein kinase	MAP2K6	K.TIDAGC*KPYMAPER.I	0.7	1.04	1.14	0.673077	0.896552	1.14	3	0.90321	0.233533	0.258559	-0.146867
682	Q14152	EIF3A Eukaryotic translation initiation factor 3 subunit	EIF3A	R.HC*DLQVR.I	0.94	0.97	0.97	0.903846	0.836207	0.97	3	0.903351	0.0668979	0.0740553	-0.146641
681	Q9NVX2	NLE1 Notchless protein homolog 1	NLE1	R.AHDGVLC*R.T	0.94	0.97	0.97	0.903846	0.836207	0.97	3	0.903351	0.0668979	0.0740553	-0.146641
258	P78371	CCT2 T-complex protein 1 subunit beta	CCT2	R.TVYGGGC*SEMLMAHAVTQLANR.T	1.11		0.74	1.06731		0.74	2	0.903654	0.231441	0.256117	-0.146158
504	O00148	DDX39A ATP-dependent RNA helicase DDX39A	DDX39A	K.HFVLDEC*DK.M	0.74	1.3	0.88	0.711538	1.12069	0.88	3	0.904076	0.205635	0.227454	-0.145484
397	Q96KB5	PBK Lymphokine-activated killer T-cell-originated prot	PBK	K.INPIC*NDHYR.S	1.17	0.88	0.83	1.125	0.758621	0.83	3	0.90454	0.194231	0.214729	-0.144743
642	Q56VL3	OCIAD2 OCIA domain-containing protein 2	OCIAD2	K.QSLLFC*PK.S	0.84	1.11	0.95	0.807692	0.956897	0.95	3	0.904863	0.0842229	0.093078	-0.144229
604	P62979	RPS27A Ubiquitin-40S ribosomal protein S27a	RPS27A	K.C*CLTYCFNKPEDK.-	0.96	1	0.93	0.923077	0.862069	0.93	3	0.905049	0.0373821	0.041304	-0.143933
656	P53007	SLC25A1 Tricarboxylate transport protein, mitochondrial	SLC25A1	R.GIGDC*VR.Q		0.99	0.96		0.853448	0.96	2	0.906724	0.0753434	0.0830941	-0.141264
418	Q9Y2R4	DDX52 Probable ATP-dependent RNA helicase DDX52	DDX52	R.SVANVIQQAGC*PVPEYIK.G		1.13	0.84		0.974138	0.84	2	0.907069	0.0948498	0.104567	-0.140716
471	P27635	RPL10 60S ribosomal protein L10	RPL10	K.MLSC*AGADR.L	1.02	1.01	0.87	0.980769	0.87069	0.87	3	0.907153	0.0637545	0.0702798	-0.140582
647	Q9UNS2	COPS3 COP9 signalosome complex subunit 3	COPS3	R.YATDTFAGLC*HQLTNALVER.K	0.9		0.95	0.865385		0.95	2	0.907692	0.0598321	0.0659167	-0.139725
288	P23528	CFL1 Cofilin-1	CFL1	K.HELQANCYEEVKDRC*TLAEK.L	1.1		0.76	1.05769		0.76	2	0.908846	0.2105	0.231613	-0.137892
296	P51532	SMARCA4 Transcription activator BRG1	SMARCA4	K.C*DMSALQR.V	1.13	1.01	0.77	1.08654	0.87069	0.77	3	0.909076	0.161723	0.177898	-0.137527
389	Q1KMD3	HNRNPUL2 Heterogeneous nuclear ribonucleoprotein U-like pro	HNRNPUL2	K.ANFSLPEKC*DYMDEVTYGELEKEEAQPIVTK.Y	1.04		0.82	1		0.82	2	0.91	0.127279	0.139867	-0.136062
451	P50990	CCT8 T-complex protein 1 subunit theta	CCT8	K.QITSYGETC*PGLEQYAIKK.F	1.05	1	0.86	1.00962	0.862069	0.86	3	0.910561	0.0857895	0.094216	-0.135172
522	P04350	TUBB4A Tubulin beta-4A chain	TUBB4A	K.TAVC*DIPPR.G	0.94	1.09	0.89	0.903846	0.939655	0.89	3	0.911167	0.0256243	0.0281225	-0.134212
573	P49189	ALDH9A1 4-trimethylaminobutyraldehyde dehydrogenase	ALDH9A1	K.GALMANFLTQGQVC*CNGTR.V	0.95		0.91	0.913462		0.91	2	0.911731	0.00244768	0.00268465	-0.13332
790	P49841	GSK3B Glycogen synthase kinase-3 beta	GSK3B	R.TTSFAESC*KPVQQPSAFGSMK.V	0.78	1.11	1.03	0.75	0.956897	1.03	3	0.912299	0.14523	0.159191	-0.132422
970	O76021	RSL1D1 Ribosomal L1 domain-containing protein 1	RSL1D1	K.AVDALLTHC*K.S	0.87	0.91	1.12	0.836538	0.784483	1.12	3	0.913674	0.180569	0.19763	-0.130249
868	O94855	SEC24D Protein transport protein Sec24D	SEC24D	K.NC*VLLSRPEISTDER.A	0.8		1.06	0.769231		1.06	2	0.914615	0.205605	0.224799	-0.128763
559	P07900	HSP90AA1 Heat shock protein HSP 90-alpha	HSP90AA1	K.HGLEVIYMIEPIDEYC*VQQLK.E	0.97		0.9	0.932692		0.9	2	0.916346	0.023117	0.0252273	-0.126035
596	Q6YN16	HSDL2 Hydroxysteroid dehydrogenase-like protein 2	HSDL2	K.TAIHTAAMDMLGGPGIESQC*R.K	0.95		0.92	0.913462		0.92	2	0.916731	0.00462339	0.00504335	-0.12543
610	Q92974	ARHGEF2 Rho guanine nucleotide exchange factor 2	ARHGEF2	R.TFNGSIELC*R.A	0.94		0.93	0.903846		0.93	2	0.916923	0.0184936	0.0201692	-0.125127
1513	Q9NQ88	TIGAR Fructose-2,6-bisphosphatase TIGAR	TIGAR	K.EADQKEQFSQGSPSNC*LETSLAEIFPLGK.N	1.11	0.89		1.06731	0.767241		2	0.917275	0.212179	0.231315	-0.124575
549	P50990	CCT8 T-complex protein 1 subunit theta	CCT8	R.NIQAC*KELAQTTR.T	0.95	1.09	0.9	0.913462	0.939655	0.9	3	0.917706	0.0201654	0.0219737	-0.123897
497	Q86YS7	C2CD5 C2 domain-containing protein 5	C2CD5	R.SAPPC*ANSTVGVVK.M		1.11	0.88		0.956897	0.88	2	0.918448	0.0543741	0.0592021	-0.12273
603	P51649	ALDH5A1 Succinate-semialdehyde dehydrogenase, mitochondria	ALDH5A1	R.NTGQTC*VCSNQFLVQR.G	1.02	0.98	0.93	0.980769	0.844828	0.93	3	0.918532	0.0686925	0.0747851	-0.122598
297	Q9BVP2	GNL3 Guanine nucleotide-binding protein-like 3	GNL3	K.LLGGFQETC*SK.A	1.16	1.01	0.77	1.11538	0.87069	0.77	3	0.918691	0.177625	0.193346	-0.122348
356	P60174	TPI1 Triosephosphate isomerase	TPI1	K.DC*GATWVVLGHSER.R	1.08		0.8	1.03846		0.8	2	0.919231	0.168618	0.183434	-0.121501
767	P22830	FECH Ferrochelatase, mitochondrial	FECH	R.AIAFTQYPQYSC*STTGSSLNAIYR.Y	1.09	0.8	1.02	1.04808	0.689655	1.02	3	0.919244	0.199325	0.216836	-0.12148
218	Q14008	CKAP5 Cytoskeleton-associated protein 5	CKAP5	R.MC*LVYPASK.M	1.18	1.05	0.72	1.13462	0.905172	0.72	3	0.919929	0.207701	0.22578	-0.120405
795	Q96C36	PYCR2 Pyrroline-5-carboxylate reductase 2	PYCR2	K.MLLDSEQHPC*QLK.D	0.67	1.26	1.03	0.644231	1.08621	1.03	3	0.920146	0.240596	0.261476	-0.120065
315	P49368	CCT3 T-complex protein 1 subunit gamma	CCT3	R.TLIQNC*GASTIR.L	1.06	1.12	0.78	1.01923	0.965517	0.78	3	0.921583	0.125521	0.136202	-0.117815
969	Q9Y490	TLN1 Talin-1	TLN1	K.ASAGPQPLLVQSC*K.A		0.84	1.12		0.724138	1.12	2	0.922069	0.279917	0.303575	-0.117053
523	P78527	PRKDC DNA-dependent protein kinase catalytic subunit	PRKDC	R.SQGC*SEQVLTVLK.T		1.11	0.89		0.956897	0.89	2	0.923448	0.047303	0.0512243	-0.114897
607	Q9Y3E5	PTRH2 Peptidyl-tRNA hydrolase 2, mitochondrial	PTRH2	R.VC*FGMLPK.S	0.92	1.11	0.93	0.884615	0.956897	0.93	3	0.923837	0.0365325	0.0395443	-0.114289
470	P62316	SNRPD2 Small nuclear ribonucleoprotein Sm D2	SNRPD2	K.NNTQVLINC*R.N	1.09	0.99	0.87	1.04808	0.853448	0.87	3	0.923842	0.107909	0.116804	-0.114282
550	P15880	RPS2 40S ribosomal protein S2	RPS2	R.C*GSVLVR.L		1.1	0.9		0.948276	0.9	2	0.924138	0.0341362	0.0369384	-0.11382
353	Q96ER3	SAAL1 Protein SAAL1	SAAL1	R.VLQNMEQC*QK.K		1.22	0.8		1.05172	0.8	2	0.925862	0.177996	0.192249	-0.111131
768	Q86VP6	CAND1 Cullin-associated NEDD8-dissociated protein 1	CAND1	R.LVEPLRATC*TTK.V	0.96	0.97	1.02	0.923077	0.836207	1.02	3	0.926428	0.0919424	0.0992439	-0.110249
628	Q00403	GTF2B Transcription initiation factor IIB	GTF2B	R.TFKEIC*AVSR.I	0.95		0.94	0.913462		0.94	2	0.926731	0.0187655	0.0202492	-0.109778
499	Q99081	TCF12 Transcription factor 12	TCF12	R.DTGLPGC*QSSLLR.Q		1.13	0.88		0.974138	0.88	2	0.927069	0.0665656	0.0718022	-0.109251
275	Q13547	HDAC1 Histone deacetylase 1	HDAC1	R.FNVGEDC*PVFDGLFEFCQLSTGGSVASAVK.L	1.15		0.75	1.10577		0.75	2	0.927885	0.251567	0.271119	-0.107983
641	B0I1T2	MYO1G Unconventional myosin-Ig	MYO1G	R.VSDC*IPLSHR.G	0.94	1.08	0.95	0.903846	0.931034	0.95	3	0.928294	0.0231987	0.0249907	-0.107347
587	P04350	TUBB4A Tubulin beta-4A chain	TUBB4A	K.NMMAAC*DPR.H	0.9	1.16	0.92	0.865385	1	0.92	3	0.928462	0.0677054	0.0729222	-0.107086
439	P30626	SRI Sorcin	SRI	R.DTAQQGVVNFPYDDFIQC*VMSV.-	1.05		0.85	1.00962		0.85	2	0.929808	0.112865	0.121385	-0.104996
583	P42677	RPS27 40S ribosomal protein S27	RPS27	K.ARLTEGC*SFR.R	1.03	1.02	0.92	0.990385	0.87931	0.92	3	0.929898	0.0561948	0.0604311	-0.104855
285	O14950	MYL12B Myosin regulatory light chain 12B	MYL12B	R.NAFAC*FDEEATGTIQEDYLR.E	1.1	1.13	0.76	1.05769	0.974138	0.76	3	0.93061	0.153545	0.164994	-0.103751
827	O75150	RNF40 E3 ubiquitin-protein ligase BRE1B	RNF40	R.LREIQPC*LAESR.A	0.96	0.95	1.05	0.923077	0.818966	1.05	3	0.930681	0.115705	0.124323	-0.103642
560	Q9NRW3	APOBEC3C DNA dC- dU-editing enzyme APOBEC-3C	APOBEC3C	R.LYYFQYPC*YQEGLR.S	1		0.9	0.961538		0.9	2	0.930769	0.0435143	0.0467509	-0.103505
597	P53350	PLK1 Serine/threonine-protein kinase PLK1	PLK1	K.C*FEISDADTKEVFAGK.I	0.98		0.92	0.942308		0.92	2	0.931154	0.0157739	0.0169402	-0.102909
500	P55060	CSE1L Exportin-2	CSE1L	K.LSTAC*PGR.V		1.14	0.88		0.982759	0.88	2	0.931379	0.0726613	0.0780147	-0.102559
897	P29372	MPG DNA-3-methyladenine glycosylase	MPG	R.AGQPHSSSDAAQAPAEQPHSSSDAAQAPC*PR.E		0.91	1.08		0.784483	1.08	2	0.932241	0.208962	0.22415	-0.101225
769	Q06323	PSME1 Proteasome activator complex subunit 1	PSME1	K.KGEDEDKGPPC*GPVNCNEK.I	0.88	1.08	1.02	0.846154	0.931034	1.02	3	0.932396	0.0869311	0.0932341	-0.100985
586	P62829	RPL23 60S ribosomal protein L23	RPL23	K.EC*ADLWPR.I	0.96	1.11	0.92	0.923077	0.956897	0.92	3	0.933324	0.0204719	0.0219344	-0.0995493
854	P49591	SARS Serine--tRNA ligase, cytoplasmic	SARS	K.YAGLSTC*FR.Q	0.86	1.06	1.06	0.826923	0.913793	1.06	3	0.933572	0.117791	0.126172	-0.0991667
886	Q9Y3E2	BOLA1 BolA-like protein 1	BOLA1	R.ENSQLDTSPPC*LGGNKK.T	0.83		1.07	0.798077		1.07	2	0.934038	0.192279	0.205857	-0.0984461
638	Q9HA64	FN3KRP Ketosamine-3-kinase	FN3KRP	R.ATGHSGGGC*ISQGR.S	1.03	1	0.95	0.990385	0.862069	0.95	3	0.934151	0.0656096	0.0702344	-0.098272
698	Q99832	CCT7 T-complex protein 1 subunit eta	CCT7	K.EGTDSSQGIPQLVSNISAC*QVIAEAVR.T	0.91	1.1	0.98	0.875	0.948276	0.98	3	0.934425	0.0538528	0.057632	-0.0978488
479	P38606	ATP6V1A V-type proton ATPase catalytic subunit A	ATP6V1A	R.DIKWDFTPC*K.N	1.04		0.87	1		0.87	2	0.935	0.0919239	0.0983143	-0.0969617
717	Q06203	PPAT Amidophosphoribosyltransferase	PPAT	K.C*ELENCQPFVVETLHGK.I	0.84	1.17	0.99	0.807692	1.00862	0.99	3	0.935438	0.111022	0.118684	-0.0962866
640	P06733	ENO1 Alpha-enolase	ENO1	K.TGAPC*R.S		1.07	0.95		0.922414	0.95	2	0.936207	0.0195064	0.0208356	-0.0951007
853	Q9BXP5	SRRT Serrate RNA effector molecule homolog	SRRT	R.LREC*ELSPGVNR.D	0.89	1.04	1.06	0.855769	0.896552	1.06	3	0.93744	0.108081	0.115294	-0.0932012
585	Q96QK1	VPS35 Vacuolar protein sorting-associated protein 35	VPS35	R.VMEC*LKK.A	1	1.08	0.92	0.961538	0.931034	0.92	3	0.937524	0.0215163	0.0229501	-0.093072
662	O43143	DHX15 Pre-mRNA-splicing factor ATP-dependent RNA helicas	DHX15	K.IAPQYYDMSNFPQC*EAK.R	0.86	1.19	0.96	0.826923	1.02586	0.96	3	0.937595	0.101344	0.10809	-0.0929631
762	P35611	ADD1 Alpha-adducin	ADD1	R.VSMILQSPAFC*EELESMIQEQFKK.G	0.9		1.01	0.865385		1.01	2	0.937692	0.102259	0.109053	-0.0928135
736	Q32NC0	C18orf21 UPF0711 protein C18orf21	C18orf21	R.GLHDSC*PGQAR.Y	0.9	1.1	1	0.865385	0.948276	1	3	0.937887	0.0679064	0.0724036	-0.0925143
982	Q13148	TARDBP TAR DNA-binding protein 43	TARDBP	R.NPVSQC*MR.G	1.07	0.76	1.13	1.02885	0.655172	1.13	3	0.938006	0.250108	0.266638	-0.0923307
406	P49792	RANBP2 E3 SUMO-protein ligase RanBP2	RANBP2	K.VC*ANHVITK.T	1.09		0.83	1.04808		0.83	2	0.939038	0.154204	0.164214	-0.0907438
503	Q99439	CNN2 Calponin-2	CNN2	K.C*ASQSGMTAYGTR.R	0.88	1.27	0.88	0.846154	1.09483	0.88	3	0.940327	0.134867	0.143426	-0.0887653
548	Q8N6H7	ARFGAP2 ADP-ribosylation factor GTPase-activating protein	ARFGAP2	R.QHGC*TANDANTK.Y	1.05	1.06	0.9	1.00962	0.913793	0.9	3	0.941136	0.0597044	0.0634386	-0.0875246
629	Q9H0A0	NAT10 RNA cytidine acetyltransferase	NAT10	R.FILSLASC*K.K	0.98		0.94	0.942308		0.94	2	0.941154	0.00163178	0.00173381	-0.0874975
731	Q8TD19	NEK9 Serine/threonine-protein kinase Nek9	NEK9	R.LLTFGC*NK.C	1	1	1	0.961538	0.862069	1	3	0.941202	0.0711787	0.0756253	-0.087423
625	O14980	XPO1 Exportin-1	XPO1	K.DLLGLC*EQKR.G	0.92	1.16	0.94	0.884615	1	0.94	3	0.941538	0.0577077	0.0612908	-0.0869081
221	P51610	HCFC1 Host cell factor 1	HCFC1	R.VAGINAC*GR.G	1.07	1.25	0.72	1.02885	1.07759	0.72	3	0.942144	0.19392	0.205828	-0.0859803
618	Q96FX7	TRMT61A tRNA (adenine(58)-N(1))-methyltransferase catalyti	TRMT61A	R.FCSFSPC*IEQVQR.T	1.03	1.04	0.94	0.990385	0.896552	0.94	3	0.942312	0.0469592	0.049834	-0.0857231
569	O60264	SMARCA5 SWI/SNF-related matrix-associated actin-dependent	SMARCA5	K.ATNVC*TR.F	0.99	1.12	0.91	0.951923	0.965517	0.91	3	0.94248	0.0289382	0.0307043	-0.0854659
816	P55060	CSE1L Exportin-2	CSE1L	K.NLFEDQNTLTSIC*EK.V	0.88		1.04	0.846154		1.04	2	0.943077	0.13707	0.145343	-0.0845526
732	P62987	UBA52 Ubiquitin-60S ribosomal protein L40	UBA52	R.QLAQKYNC*DK.M	0.98	1.03	1	0.942308	0.887931	1	3	0.943413	0.0560427	0.0594042	-0.0840388
806	P04350	TUBB4A Tubulin beta-4A chain	TUBB4A	K.VSDTVVEPYNATLSVHQLVENTDETYC*IDNEALYDICFR.T	1.03	0.93	1.04	0.990385	0.801724	1.04	3	0.944036	0.125718	0.133171	-0.0830858
928	Q7L576	CYFIP1 Cytoplasmic FMR1-interacting protein 1	CYFIP1	K.C*NEQPNRVEIYEK.T	0.83		1.09	0.798077		1.09	2	0.944038	0.206421	0.218657	-0.0830825
525	P63010	AP2B1 AP-2 complex subunit beta	AP2B1	R.TMGC*IR.V		1.16	0.89		1	0.89	2	0.945	0.0777817	0.0823087	-0.0816138
493	B0I1T2	MYO1G Unconventional myosin-Ig	MYO1G	K.STC*VLEAFGNAR.T	1.11	1.03	0.88	1.06731	0.887931	0.88	3	0.94508	0.105927	0.112083	-0.0814923
142	Q96BN8	OTULIN Ubiquitin thioesterase otulin	OTULIN	R.VRGDNYC*ALR.A	1.29		0.65	1.24038		0.65	2	0.945192	0.417465	0.441672	-0.0813202
1525	Q8TB03	CXorf38 Uncharacterized protein CXorf38	CXorf38	R.LNC*AEYK.N	1.07	1		1.02885	0.862069		2	0.945458	0.117929	0.124732	-0.0809154
1096	Q9Y2Q5	LAMTOR2 Ragulator complex protein LAMTOR2	LAMTOR2	K.FILMDC*MEGR.V		0.79	1.21		0.681034	1.21	2	0.945517	0.374035	0.395588	-0.0808243
475	Q9UGV2	NDRG3 Protein NDRG3	NDRG3	K.MADC*GGLPQVVQPGK.L		1.19	0.87		1.02586	0.87	2	0.947931	0.110211	0.116265	-0.077146
1160	Q15208	STK38 Serine/threonine-protein kinase 38	STK38	K.LSDFGLC*TGLK.K	0.85	0.89	1.26	0.817308	0.767241	1.26	3	0.948183	0.271199	0.28602	-0.0767625
521	P30153	PPP2R1A Serine/threonine-protein phosphatase 2A 65 kDa reg	PPP2R1A	R.LNIISNLDC*VNEVIGIR.Q	1.12	1.02	0.89	1.07692	0.87931	0.89	3	0.948744	0.111135	0.117139	-0.0759085
643	P68363	TUBA1B Tubulin alpha-1B chain	TUBA1B	K.YMAC*CLLYR.G	0.96	1.13	0.95	0.923077	0.974138	0.95	3	0.949072	0.0255432	0.0269138	-0.0754111
961	Q6UB35	MTHFD1L Monofunctional C1-tetrahydrofolate synthase, mitoc	MTHFD1L	K.IDRYTQQGFGNLPIC*MAK.T	0.82		1.11	0.788462		1.11	2	0.949231	0.227362	0.239522	-0.0751692
996	Q05086	UBE3A Ubiquitin-protein ligase E3A	UBE3A	K.GAPNNSC*SEIK.M		0.88	1.14		0.758621	1.14	2	0.94931	0.269676	0.284076	-0.0750483
343	P26368	U2AF2 Splicing factor U2AF 65 kDa subunit	U2AF2	K.YC*DPDSYHRR.D	1.37	0.85	0.8	1.31731	0.732759	0.8	3	0.950022	0.319851	0.336677	-0.073967
598	P45984	MAPK9 Mitogen-activated protein kinase 9	MAPK9	R.TAC*TNFMMTPYVVTR.Y	1.02		0.92	0.980769		0.92	2	0.950385	0.0429703	0.0452136	-0.0734166
697	P07814	EPRS Bifunctional glutamate/proline--tRNA ligase	EPRS	K.SC*QFVAVR.R	0.97	1.09	0.98	0.932692	0.939655	0.98	3	0.950782	0.0255415	0.0268636	-0.0728128
365	Q9HC21	SLC25A19 Mitochondrial thiamine pyrophosphate carrier	SLC25A19	K.GLMDC*AK.Q	1.4	0.81	0.81	1.34615	0.698276	0.81	3	0.951477	0.346335	0.363998	-0.07176
498	Q13155	AIMP2 Aminoacyl tRNA synthase complex-interacting multif	AIMP2	K.FSIQTMC*PIEGEGNIAR.F	1.05	1.12	0.88	1.00962	0.965517	0.88	3	0.951711	0.0659014	0.0692452	-0.0714047
683	Q13526	PIN1 Peptidyl-prolyl cis-trans isomerase NIMA-interacti	PIN1	K.IKSGEEDFESLASQFSDC*SSAK.A	1.04	1.03	0.97	1	0.887931	0.97	3	0.952644	0.0580155	0.0608994	-0.0699914
298	O75717	WDHD1 WD repeat and HMG-box DNA-binding protein 1	WDHD1	K.LPYC*QIATEK.G	1.01	1.3	0.77	0.971154	1.12069	0.77	3	0.953948	0.175977	0.184472	-0.0680177
658	P49327	FASN Fatty acid synthase	FASN	K.AFDTAGNGYC*R.S		1.1	0.96		0.948276	0.96	2	0.954138	0.00829022	0.0086887	-0.0677303
273	P42704	LRPPRC Leucine-rich PPR motif-containing protein, mitocho	LRPPRC	K.LFEC*DRDQMYYNLLK.L	1.14	1.18	0.75	1.09615	1.01724	0.75	3	0.954465	0.181415	0.190069	-0.0672357
552	P60468	SEC61B Protein transport protein Sec61 subunit beta	SEC61B	K.NASC*GTR.S	0.94	1.23	0.9	0.903846	1.06034	0.9	3	0.95473	0.0914851	0.0958229	-0.0668348
460	O95793	STAU1 Double-stranded RNA-binding protein Staufen homolo	STAU1	R.TGNGPMSVC*GR.C		1.22	0.86		1.05172	0.86	2	0.955862	0.135569	0.141829	-0.0651256
706	P62753	RPS6 40S ribosomal protein S6	RPS6	R.GC*IVDANLSVLNLVIVK.K	0.97		0.98	0.932692		0.98	2	0.956346	0.0334516	0.0349785	-0.0643952
501	Q14318	FKBP8 Peptidyl-prolyl cis-trans isomerase FKBP8	FKBP8	R.SC*SLVLEHQPDNIK.A	1.02	1.17	0.88	0.980769	1.00862	0.88	3	0.956463	0.0676676	0.0707477	-0.0642185
623	Q6UB35	MTHFD1L Monofunctional C1-tetrahydrofolate synthase, mitoc	MTHFD1L	K.VGC*GSPR.I		1.13	0.94		0.974138	0.94	2	0.957069	0.0241392	0.025222	-0.0633052
789	Q14318	FKBP8 Peptidyl-prolyl cis-trans isomerase FKBP8	FKBP8	K.C*LNNLAASQLK.L	0.93	1.1	1.03	0.894231	0.948276	1.03	3	0.957502	0.0683532	0.071387	-0.0626523
1520	Q86VP6	CAND1 Cullin-associated NEDD8-dissociated protein 1	CAND1	R.NVVAEC*LGK.L	1.14	0.95		1.09615	0.818966		2	0.95756	0.196002	0.204689	-0.0625657
733	P55263	ADK Adenosine kinase	ADK	R.TGC*TFPEKPDFH.-	0.98	1.08	1	0.942308	0.931034	1	3	0.957781	0.0369949	0.0386256	-0.0622327
238	Q12830	BPTF Nucleosome-remodeling factor subunit BPTF	BPTF	K.AVQMC*SKPR.E		1.38	0.73		1.18966	0.73	2	0.959828	0.325025	0.338629	-0.0591528
608	Q9BVQ7	SPATA5L1 Spermatogenesis-associated protein 5-like protein	SPATA5L1	K.GVLLYGPPGC*AK.T		1.15	0.93		0.991379	0.93	2	0.96069	0.0434017	0.0451777	-0.0578576
772	Q01813	PFKP ATP-dependent 6-phosphofructokinase, platelet type	PFKP	R.LPLMEC*VQMTQDVQK.A	0.87	1.19	1.02	0.836538	1.02586	1.02	3	0.9608	0.107654	0.112046	-0.0576917
695	Q9P0L0	VAPA Vesicle-associated membrane protein-associated pro	VAPA	K.LMEEC*KR.L	1.1	0.98	0.98	1.05769	0.844828	0.98	3	0.96084	0.107718	0.112108	-0.0576319
276	Q6NXE6	ARMC6 Armadillo repeat-containing protein 6	ARMC6	R.FC*DQCKQDK.A	1.22		0.75	1.17308		0.75	2	0.961538	0.299161	0.311127	-0.0565835
220	Q9UHD1	CHORDC1 Cysteine and histidine-rich domain-containing prot	CHORDC1	K.ELC*ELKPK.F	1.23	1.14	0.72	1.18269	0.982759	0.72	3	0.961817	0.232056	0.241268	-0.0561657
684	Q6P2Q9	PRPF8 Pre-mRNA-processing-splicing factor 8	PRPF8	R.GATVDKTVC*KK.N	1.07	1.03	0.97	1.02885	0.887931	0.97	3	0.962259	0.0707758	0.0735517	-0.0555027
172	P21796	VDAC1 Voltage-dependent anion-selective channel protein	VDAC1	K.YQIDPDAC*FSAK.V	1.55	0.82	0.69	1.49038	0.706897	0.69	3	0.962427	0.457303	0.475156	-0.0552509
660	O96017	CHEK2 Serine/threonine-protein kinase Chk2	CHEK2	K.TLGSGAC*GEVK.L		1.12	0.96		0.965517	0.96	2	0.962759	0.00390128	0.00405219	-0.054754
494	Q7L2H7	EIF3M Eukaryotic translation initiation factor 3 subunit	EIF3M	K.VAASC*GAIQYIPTELDQVRK.W	1.15	1.05	0.88	1.10577	0.905172	0.88	3	0.963647	0.123723	0.12839	-0.053423
463	P51610	HCFC1 Host cell factor 1	HCFC1	R.AC*AAGTPAVIR.I	1.11		0.86	1.06731		0.86	2	0.963654	0.146589	0.152118	-0.0534131
599	O14981	BTAF1 TATA-binding protein-associated factor 172	BTAF1	R.LNFDRFDIC*R.L	1.05		0.92	1.00962		0.92	2	0.964808	0.0633676	0.065679	-0.0516867
734	Q9NP73	ALG13 Putative bifunctional UDP-N-acetylglucosamine tran	ALG13	K.ADLVISHAGAGSC*LETLEK.G		1.08	1		0.931034	1	2	0.965517	0.048766	0.0505076	-0.0506261
1124	O95373	IPO7 Importin-7	IPO7	R.GIDQC*IPLFVEAALER.L	0.74		1.22	0.711538		1.22	2	0.965769	0.359537	0.37228	-0.0502496
742	Q9NRX1	PNO1 RNA-binding protein PNO1	PNO1	R.TAIC*NLILGNPPSK.V	0.97		1	0.932692		1	2	0.966346	0.0475937	0.0492512	-0.049388
763	P54886	ALDH18A1 Delta-1-pyrroline-5-carboxylate synthase	ALDH18A1	K.CEYPAAC*NALETLLIHR.D	0.96		1.01	0.923077		1.01	2	0.966538	0.0614639	0.0635918	-0.049101
1165	P78559	MAP1A Microtubule-associated protein 1A	MAP1A	K.SPC*GLTEQYLHK.D	0.7		1.26	0.673077		1.26	2	0.966538	0.415017	0.429385	-0.049101
527	Q01082	SPTBN1 Spectrin beta chain, non-erythrocytic 1	SPTBN1	K.FATDGEGYKPC*DPQVIR.D		1.21	0.89		1.0431	0.89	2	0.966552	0.10826	0.112007	-0.0490812
419	Q96GM8	TOE1 Target of EGR1 protein 1	TOE1	K.SLLNQC*IEER.Y		1.27	0.84		1.09483	0.84	2	0.967414	0.18019	0.18626	-0.047795
929	O00429	DNM1L Dynamin-1-like protein	DNM1L	R.IIQHC*SNYSTQELLR.F	0.88		1.09	0.846154		1.09	2	0.968077	0.172425	0.178111	-0.0468064
995	P09211	GSTP1 Glutathione S-transferase P	GSTP1	K.ASC*LYGQLPK.F	1.1	0.82	1.14	1.05769	0.706897	1.14	3	0.968196	0.230004	0.237559	-0.0466285
526	Q8N1F7	NUP93 Nuclear pore complex protein Nup93	NUP93	K.SSGQSAQLLSHEPGDPPC*LR.R	1.03	1.19	0.89	0.990385	1.02586	0.89	3	0.968749	0.0704677	0.072741	-0.0458053
991	Q9Y5P6	GMPPB Mannose-1-phosphate guanyltransferase beta	GMPPB	R.LC*SGPGIVGNVLVDPSAR.I	0.84		1.13	0.807692		1.13	2	0.968846	0.227906	0.235234	-0.0456605
738	P62280	RPS11 40S ribosomal protein S11	RPS11	K.C*PFTGNVSIR.G	0.98	1.12	1	0.942308	0.965517	1	3	0.969275	0.0290291	0.0299493	-0.0450221
735	Q16666	IFI16 Gamma-interferon-inducible protein 16	IFI16	R.LTTINC*EEGDKLK.L		1.09	1		0.939655	1	2	0.969828	0.0426702	0.0439978	-0.0441998
502	P46940	IQGAP1 Ras GTPase-activating-like protein IQGAP1	IQGAP1	K.TC*LDNLASK.G		1.23	0.88		1.06034	0.88	2	0.970172	0.127523	0.131444	-0.0436869
352	P30050	RPL12 60S ribosomal protein L12	RPL12	R.C*TGGEVGATSALAPK.I	1.14	1.18	0.8	1.09615	1.01724	0.8	3	0.971132	0.153367	0.157926	-0.0422611
939	Q00403	GTF2B Transcription initiation factor IIB	GTF2B	R.FCSNLC*LPK.Q	0.9	1.1	1.1	0.865385	0.948276	1.1	3	0.97122	0.118979	0.122504	-0.0421297
239	O75521	ECI2 Enoyl-CoA delta isomerase 2, mitochondrial	ECI2	K.LHAVNAEEC*NVLQGR.W	0.98	1.44	0.73	0.942308	1.24138	0.73	3	0.971229	0.256913	0.264524	-0.0421166
962	O15111	CHUK Inhibitor of nuclear factor kappa-B kinase subunit	CHUK	R.KPASQC*VLDGVR.G	0.87		1.11	0.836538		1.11	2	0.973269	0.193367	0.198677	-0.0390891
715	P40306	PSMB10 Proteasome subunit beta type-10	PSMB10	R.GGFSFENC*QR.N		1.11	0.99		0.956897	0.99	2	0.973448	0.0234077	0.0240461	-0.0388238
716	P53384	NUBP1 Cytosolic Fe-S cluster assembly factor NUBP1	NUBP1	R.LC*ASGAGATPDTAIEEIKEK.M		1.11	0.99		0.956897	0.99	2	0.973448	0.0234077	0.0240461	-0.0388238
809	Q06265	EXOSC9 Exosome complex component RRP45	EXOSC9	-.MKETPLSNC*ER.R	0.98	1.09	1.04	0.942308	0.939655	1.04	3	0.973988	0.0571838	0.058711	-0.0380247
561	P08238	HSP90AB1 Heat shock protein HSP 90-beta	HSP90AB1	K.RGFEVVYMTEPIDEYC*VQQLK.E	1.09		0.9	1.04808		0.9	2	0.974038	0.104706	0.107497	-0.0379494
370	Q92797	SYMPK Symplekin	SYMPK	K.AVAC*SGAAQVR.I	1.29	1.02	0.81	1.24038	0.87931	0.81	3	0.976565	0.231088	0.236633	-0.034212
357	O75390	CS Citrate synthase, mitochondrial	CS	K.LPC*VAAK.I	1.2		0.8	1.15385		0.8	2	0.976923	0.250207	0.256117	-0.0336831
1127	O94915	FRYL Protein furry homolog-like	FRYL	R.IKC*ESNTVTQSR.L		0.84	1.23		0.724138	1.23	2	0.977069	0.357698	0.366093	-0.0334677
1555	Q8N9T8	KRI1 Protein KRI1 homolog	KRI1	R.LLGPTVMLGGC*EFSR.Q	0.84	1.33		0.807692	1.14655		2	0.977122	0.23961	0.24522	-0.0333894
609	Q15365	PCBP1 Poly(rC)-binding protein 1	PCBP1	R.AITIAGVPQSVTEC*VK.Q		1.19	0.93		1.02586	0.93	2	0.977931	0.0677847	0.0693144	-0.0321954
737	P53384	NUBP1 Cytosolic Fe-S cluster assembly factor NUBP1	NUBP1	K.NC*DKGQSFFIDAPDSPATLAYR.S		1.11	1		0.956897	1	2	0.978448	0.0304787	0.0311501	-0.0314325
386	Q9NZB2	FAM120A Constitutive coactivator of PPAR-gamma-like protei	FAM120A	R.VAAASGHC*GAFSGSDSSR.T	0.91	1.44	0.82	0.875	1.24138	0.82	3	0.978793	0.229063	0.234026	-0.0309242
718	Q9BQE3	TUBA1C Tubulin alpha-1C chain	TUBA1C	K.AYHEQLTVAEITNAC*FEPANQMVK.C	0.94	1.21	0.99	0.903846	1.0431	0.99	3	0.978983	0.0702793	0.071788	-0.030644
752	P27635	RPL10 60S ribosomal protein L10	RPL10	R.IC*ANKYMVK.S		1.1	1.01		0.948276	1.01	2	0.979138	0.0436456	0.0445755	-0.030416
648	P25789	PSMA4 Proteasome subunit alpha type-4	PSMA4	K.ATC*IGNNSAAAVSMLK.Q	1.05		0.95	1.00962		0.95	2	0.979808	0.0421544	0.0430232	-0.0294295
1035	P53618	COPB1 Coatomer subunit beta	COPB1	R.TLHSC*SVR.F	0.9	1.05	1.17	0.865385	0.905172	1.17	3	0.980186	0.165583	0.168931	-0.028873
859	P22090	RPS4Y1 40S ribosomal protein S4, Y isoform 1	RPS4Y1	K.YALTGDEVKKIC*MQR.F	0.89	1.19	1.06	0.855769	1.02586	1.06	3	0.980544	0.109398	0.111568	-0.0283461
551	Q15233	NONO Non-POU domain-containing octamer-binding protein	NONO	R.FAC*HSASLTVR.N	1.03	1.22	0.9	0.990385	1.05172	0.9	3	0.980703	0.076324	0.0778258	-0.0281119
570	Q96T88	UHRF1 E3 ubiquitin-protein ligase UHRF1	UHRF1	K.GMAC*VGR.T		1.22	0.91		1.05172	0.91	2	0.980862	0.100214	0.102169	-0.0278778
842	O95478	NSA2 Ribosome biogenesis protein NSA2 homolog	NSA2	K.VC*FVGDGFTR.K	0.95		1.05	0.913462		1.05	2	0.981731	0.0965473	0.0983439	-0.0266007
923	Q9Y5Y2	NUBP2 Cytosolic Fe-S cluster assembly factor NUBP2	NUBP2	R.AVHQC*DR.G	0.9	1.15	1.09	0.865385	0.991379	1.09	3	0.982255	0.112585	0.114619	-0.025831
976	P33992	MCM5 DNA replication licensing factor MCM5	MCM5	K.C*SPIGVYTSGK.G	0.71	1.33	1.12	0.682692	1.14655	1.12	3	0.983081	0.260483	0.264966	-0.0246173
534	P62873	GNB1 Guanine nucleotide-binding protein G(I)/G(S)/G(T)	GNB1	R.KAC*ADATLSQITNNIDPVGR.I	1.37	0.85	0.9	1.31731	0.732759	0.9	3	0.983355	0.301057	0.306153	-0.0242151
346	P40227	CCT6A T-complex protein 1 subunit zeta	CCT6A	K.NAIDDGC*VVPGAGAVEVAMAEALIK.H	1.34	1	0.8	1.28846	0.862069	0.8	3	0.98351	0.265913	0.270371	-0.0239881
770	P54646	PRKAA2 5-AMP-activated protein kinase catalytic subunit	PRKAA2	R.TSC*GSPNYAAPEVISGR.L		1.1	1.02		0.948276	1.02	2	0.984138	0.0507166	0.0515341	-0.0230676
808	Q9Y285	FARSA Phenylalanine--tRNA ligase alpha subunit	FARSA	K.VNLQMVYDSPLC*R.L	1.03	1.07	1.04	0.990385	0.922414	1.04	3	0.984266	0.0590314	0.059975	-0.0228796
649	P34896	SHMT1 Serine hydroxymethyltransferase, cytosolic	SHMT1	K.LIIAGTSC*YSR.N	1.06		0.95	1.01923		0.95	2	0.984615	0.0489535	0.0497184	-0.0223678
487	Q86VP6	CAND1 Cullin-associated NEDD8-dissociated protein 1	CAND1	R.LSTLC*PSAVLQR.L	1.36	0.89	0.88	1.30769	0.767241	0.88	3	0.984978	0.285109	0.289457	-0.0218367
753	P36578	RPL4 60S ribosomal protein L4	RPL4	R.SGQGAFGNMC*R.G	1.01	1.13	1.01	0.971154	0.974138	1.01	3	0.985097	0.021618	0.021945	-0.0216619
588	Q9HAS0	C17orf75 Protein Njmu-R1	C17orf75	K.NNMNC*EAR.G		1.22	0.92		1.05172	0.92	2	0.985862	0.093143	0.0944788	-0.0205423
800	Q14151	SAFB2 Scaffold attachment factor B2	SAFB2	R.KFDFDAC*NEVPPAPK.E	0.98		1.03	0.942308		1.03	2	0.986154	0.0620078	0.0628785	-0.0201154
476	O60264	SMARCA5 SWI/SNF-related matrix-associated actin-dependent	SMARCA5	R.NYEYC*R.L		1.28	0.87		1.10345	0.87	2	0.986724	0.165073	0.167294	-0.0192813
1532	P54577	YARS Tyrosine--tRNA ligase, cytoplasmic	YARS	K.LGSISC*K.S	1.12	1.04		1.07692	0.896552		2	0.986737	0.127542	0.129256	-0.0192619
371	O00410	IPO5 Importin-5	IPO5	K.TKENVNATENC*ISAVGK.I		1.35	0.81		1.16379	0.81	2	0.986897	0.25017	0.253491	-0.0190292
668	Q9NXV6	CDKN2AIP CDKN2A-interacting protein	CDKN2AIP	K.SVYLGTGC*GK.S	0.79	1.44	0.96	0.759615	1.24138	0.96	3	0.986998	0.242014	0.245202	-0.0188806
739	P27707	DCK Deoxycytidine kinase	DCK	R.SC*PSFSASSEGTR.I		1.13	1		0.974138	1	2	0.987069	0.0182872	0.0185268	-0.0187772
407	P26368	U2AF2 Splicing factor U2AF 65 kDa subunit	U2AF2	K.SIEIPRPVDGVEVPGC*GK.I	1.19		0.83	1.14423		0.83	2	0.987115	0.222195	0.225095	-0.0187094
701	P31943	HNRNPH1 Heterogeneous nuclear ribonucleoprotein H	HNRNPH1	R.DLNYC*FSGMSDHR.Y	0.95	1.24	0.98	0.913462	1.06897	0.98	3	0.987476	0.0780211	0.0790106	-0.0181829
663	P35579	MYH9 Myosin-9	MYH9	R.SMMQDREDQSILC*TGESGAGK.T	0.98	1.23	0.96	0.942308	1.06034	0.96	3	0.987551	0.0636591	0.0644616	-0.0180731
954	Q9NV70	EXOC1 Exocyst complex component 1	EXOC1	R.NFDKC*ISNQIR.Q	1.05	0.98	1.11	1.00962	0.844828	1.11	3	0.988148	0.133883	0.135489	-0.0172015
574	O75528	TADA3 Transcriptional adapter 3	TADA3	K.KSEAQHEQPEDGC*PFGALTQR.L	1.11		0.91	1.06731		0.91	2	0.988654	0.111233	0.11251	-0.0164626
332	P61978	HNRNPK Heterogeneous nuclear ribonucleoprotein K	HNRNPK	K.GSDFDC*ELR.L	1.36	1.01	0.79	1.30769	0.87069	0.79	3	0.989461	0.278534	0.281501	-0.0152858
688	Q9Y2R9	MRPS7 28S ribosomal protein S7, mitochondrial	MRPS7	K.NC*EPMIGLVPILK.G	1.05		0.97	1.00962		0.97	2	0.989808	0.0280123	0.0283008	-0.0147798
459	P36578	RPL4 60S ribosomal protein L4	RPL4	R.GPC*IIYNEDNGIIK.A	1.12	1.2	0.86	1.07692	1.03448	0.86	3	0.990469	0.114965	0.116071	-0.0138168
817	P46782	RPS5 40S ribosomal protein S5	RPS5	K.TIAEC*LADELINAAK.G	0.98		1.04	0.942308		1.04	2	0.991154	0.0690789	0.0696954	-0.0128191
887	O43684	BUB3 Mitotic checkpoint protein BUB3	BUB3	R.TPC*NAGTFSQPEK.V	0.95		1.07	0.913462		1.07	2	0.991731	0.110689	0.111612	-0.0119796
699	Q9NR50	EIF2B3 Translation initiation factor eIF-2B subunit gamma	EIF2B3	K.ALC*AEFK.M	1	1.2	0.98	0.961538	1.03448	0.98	3	0.992007	0.0379255	0.0382311	-0.0115777
480	P53618	COPB1 Coatomer subunit beta	COPB1	K.AAAQC*YIDLIIK.E	1.16		0.87	1.11538		0.87	2	0.992692	0.173513	0.17479	-0.0105815
505	Q15366	PCBP2 Poly(rC)-binding protein 2	PCBP2	R.AITIAGIPQSIIEC*VK.Q	1	1.32	0.88	0.961538	1.13793	0.88	3	0.993156	0.13184	0.132749	-0.00990702
898	Q13769	THOC5 THO complex subunit 5 homolog	THOC5	K.YREC*LSNK.E	1.07	1.01	1.08	1.02885	0.87069	1.08	3	0.993179	0.109118	0.109868	-0.00987491
553	O94906	PRPF6 Pre-mRNA-processing factor 6	PRPF6	R.AVAHC*PK.A	1.06	1.23	0.9	1.01923	1.06034	0.9	3	0.993192	0.0832835	0.0838543	-0.00985565
473	P53990	IST1 IST1 homolog	IST1	K.IVADQLC*AK.Y	1.19	1.12	0.87	1.14423	0.965517	0.87	3	0.993249	0.139203	0.140149	-0.00977217
937	P62913	RPL11 60S ribosomal protein L11	RPL11	K.LC*LNICVGESGDR.L	1.05	1.01	1.1	1.00962	0.87069	1.1	3	0.993435	0.115508	0.116272	-0.0095025
707	P30084	ECHS1 Enoyl-CoA hydratase, mitochondrial	ECHS1	K.AFAAGADIKEMQNLSFQDC*YSSK.F	1.05		0.98	1.00962		0.98	2	0.994808	0.0209412	0.0210505	-0.00751043
720	P62979	RPS27A Ubiquitin-40S ribosomal protein S27a	RPS27A	K.ISRLRREC*PSDECGAGVFMASHFDR.H	1.04		0.99	1		0.99	2	0.995	0.00707107	0.0071066	-0.00723157
721	Q9P2R3	ANKFY1 Rabankyrin-5	ANKFY1	R.GSHTDAPDTATGNC*LLQR.A	1.04		0.99	1		0.99	2	0.995	0.00707107	0.0071066	-0.00723157
773	Q9BW27	NUP85 Nuclear pore complex protein Nup85	NUP85	R.FLRDYC*ER.G	0.98	1.19	1.02	0.942308	1.02586	1.02	3	0.996057	0.0466401	0.0468247	-0.00570039
826	P08238	HSP90AB1 Heat shock protein HSP 90-beta	HSP90AB1	R.LVSSPC*CIVTSTYGWTANMER.I	1.24	0.87	1.05	1.19231	0.75	1.05	3	0.997436	0.22579	0.226371	-0.00370397
481	Q56VL3	OCIAD2 OCIA domain-containing protein 2	OCIAD2	R.HC*LLTCEECK.I	1.17		0.87	1.125		0.87	2	0.9975	0.180312	0.180764	-0.00361125
1526	O43747	AP1G1 AP-1 complex subunit gamma-1	AP1G1	R.EMIQKEC*AAIR.S	1.17	1.01		1.125	0.87069		2	0.997845	0.179825	0.180213	-0.00311261
244	Q12874	SF3A3 Splicing factor 3A subunit 3	SF3A3	R.YLDLHDC*YLK.Y	1.32		0.73	1.26923		0.73	2	0.999615	0.381294	0.38144	-0.000554989
754	P09496	CLTA Clathrin light chain A	CLTA	R.LC*DFNPK.S		1.15	1.01		0.991379	1.01	2	1.00069	0.0131668	0.0131577	0.000994619
429	P43034	PAFAH1B1 Platelet-activating factor acetylhydrolase IB subu	PAFAH1B1	R.MVRPNQDGTLIASC*SNDQTVR.V	1.21		0.84	1.16346		0.84	2	1.00173	0.228722	0.228327	0.00249481
621	O75822	EIF3J Eukaryotic translation initiation factor 3 subunit	EIF3J	K.ITNSLTVLC*SEK.Q	1.2	1.06	0.94	1.15385	0.913793	0.94	3	1.00255	0.131683	0.131349	0.00366904
590	Q14155	ARHGEF7 Rho guanine nucleotide exchange factor 7	ARHGEF7	K.NLSAQC*QEVR.K		1.26	0.92		1.08621	0.92	2	1.0031	0.117526	0.117162	0.0044704
900	O14929	HAT1 Histone acetyltransferase type B catalytic subunit	HAT1	K.VDENFDC*VEADDVEGK.I	0.94	1.19	1.08	0.903846	1.02586	1.08	3	1.00324	0.0902302	0.0899392	0.00466113
828	P13716	ALAD Delta-aminolevulinic acid dehydratase	ALAD	R.C*YQLPPGAR.G		1.11	1.05		0.956897	1.05	2	1.00345	0.0658341	0.0656078	0.00496625
857	Q86Y56	DNAAF5 Dynein assembly factor 5, axonemal	DNAAF5	R.AC*LQPSQDPQMR.L		1.1	1.06		0.948276	1.06	2	1.00414	0.0790009	0.0786753	0.00595746
645	Q9UIG0	BAZ1B Tyrosine-protein kinase BAZ1B	BAZ1B	R.SALSC*VISK.T		1.23	0.95		1.06034	0.95	2	1.00517	0.0780256	0.0776241	0.00744298
907	P45880	VDAC2 Voltage-dependent anion-selective channel protein	VDAC2	K.SC*SGVEFSTSGSSNTDTGK.V	0.83	1.32	1.08	0.798077	1.13793	1.08	3	1.00534	0.181814	0.180849	0.00767773
584	P17987	TCP1 T-complex protein 1 subunit alpha	TCP1	R.GANDFMC*DEMER.S	1.23	1.06	0.92	1.18269	0.913793	0.92	3	1.0055	0.153489	0.15265	0.0079061
554	Q96F86	EDC3 Enhancer of mRNA-decapping protein 3	EDC3	K.SQDVAVSPQQQQC*SK.S		1.29	0.9		1.11207	0.9	2	1.00603	0.149955	0.149056	0.00867976
1012	Q15021	NCAPD2 Condensin complex subunit 1	NCAPD2	R.EIGQKC*PQELSR.D	0.86	1.21	1.15	0.826923	1.0431	1.15	3	1.00668	0.16459	0.163499	0.00959872
1079	P52272	HNRNPM Heterogeneous nuclear ribonucleoprotein M	HNRNPM	K.DKFNEC*GHVLYADIK.M	1.15	0.83	1.2	1.10577	0.715517	1.2	3	1.0071	0.256872	0.255062	0.0102005
700	P24752	ACAT1 Acetyl-CoA acetyltransferase, mitochondrial	ACAT1	K.VC*ASGMK.A		1.2	0.98		1.03448	0.98	2	1.00724	0.0385251	0.0382482	0.0104095
508	Q08211	DHX9 ATP-dependent RNA helicase A	DHX9	K.LQISHEAAAC*ITGLR.A	1.18		0.88	1.13462		0.88	2	1.00731	0.18004	0.178734	0.0105044
829	P61158	ACTR3 Actin-related protein 3	ACTR3	K.ERYSYVC*PDLVK.E		1.12	1.05		0.965517	1.05	2	1.00776	0.0597383	0.0592784	0.0111501
922	Q8TDX7	NEK7 Serine/threonine-protein kinase Nek7	NEK7	R.MHAC*TASS.-	1.01	1.12	1.09	0.971154	0.965517	1.09	3	1.00889	0.0702995	0.06968	0.0127694
818	Q9UBF2	COPG2 Coatomer subunit gamma-2	COPG2	K.VVVVQAISALC*QK.Y	1.02		1.04	0.980769		1.04	2	1.01038	0.0418825	0.041452	0.0149046
1270	Q16666	IFI16 Gamma-interferon-inducible protein 16	IFI16	K.INQLC*SQTK.G	0.86	1.01	1.34	0.826923	0.87069	1.34	3	1.01254	0.284434	0.280912	0.0179755
664	P05388	RPLP0 60S acidic ribosomal protein P0	RPLP0	R.AGAIAPC*EVTVPAQNTGLGPEK.T	1.06	1.23	0.96	1.01923	1.06034	0.96	3	1.01319	0.0504443	0.0497875	0.0189074
764	P78559	MAP1A Microtubule-associated protein 1A	MAP1A	K.GSSGAPVYVDLAYIPNHC*SGK.T	1.06		1.01	1.01923		1.01	2	1.01462	0.00652714	0.00643312	0.0209329
1545	O95071	UBR5 E3 ubiquitin-protein ligase UBR5	UBR5	K.VPDC*FQR.T	1	1.24		0.961538	1.06897		2	1.01525	0.0759624	0.0748212	0.0218379
985	Q13155	AIMP2 Aminoacyl tRNA synthase complex-interacting multif	AIMP2	R.VELPTC*MYR.L	0.89	1.23	1.13	0.855769	1.06034	1.13	3	1.01537	0.14254	0.140382	0.0220075
1010	P26196	DDX6 Probable ATP-dependent RNA helicase DDX6	DDX6	K.GNEFEDYC*LKR.E	0.95	1.14	1.15	0.913462	0.982759	1.15	3	1.01541	0.121602	0.119757	0.0220577
938	B5ME19	EIF3CL Eukaryotic translation initiation factor 3 subunit	EIF3CL	R.GC*ILTLVER.M		1.08	1.1		0.931034	1.1	2	1.01552	0.119477	0.117651	0.0222147
888	Q86VY4	TSPYL5 Testis-specific Y-encoded-like protein 5	TSPYL5	K.VLIKEYGC*GPSGQVVSR.S	1		1.07	0.961538		1.07	2	1.01577	0.0766939	0.0755033	0.0225727
856	Q8TDN6	BRIX1 Ribosome biogenesis protein BRX1 homolog	BRIX1	R.DRIPGPVC*K.G	1.09	1.09	1.06	1.04808	0.939655	1.06	3	1.01591	0.0663078	0.0652693	0.0227736
796	P68363	TUBA1B Tubulin alpha-1B chain	TUBA1B	K.AYHEQLSVAEITNAC*FEPANQMVK.C	0.96	1.27	1.03	0.923077	1.09483	1.03	3	1.01597	0.0867309	0.0853677	0.0228552
1013	Q01581	HMGCS1 Hydroxymethylglutaryl-CoA synthase, cytoplasmic	HMGCS1	K.LSIQC*YLSALDR.C	0.89	1.21	1.15	0.855769	1.0431	1.15	3	1.01629	0.148937	0.146549	0.0233134
963	O00487	PSMD14 26S proteasome non-ATPase regulatory subunit 14	PSMD14	K.SWMEGLTLQDYSEHC*K.H	0.96		1.11	0.923077		1.11	2	1.01654	0.132175	0.130024	0.0236648
793	Q00839	HNRNPU Heterogeneous nuclear ribonucleoprotein U	HNRNPU	K.GKVC*FEMK.V	1	1.23	1.03	0.961538	1.06034	1.03	3	1.01729	0.0506137	0.0497533	0.0247373
575	P82912	MRPS11 28S ribosomal protein S11, mitochondrial	MRPS11	K.ASHNNTQIQVVSASNEPLAFASC*GTEGFR.N	1.17		0.91	1.125		0.91	2	1.0175	0.152028	0.149413	0.0250288
1549	Q92619	ARHGAP45 Rho GTPase-activating protein 45	ARHGAP45	R.AHEC*LGEALR.V	0.97	1.28		0.932692	1.10345		2	1.01807	0.120743	0.1186	0.0258372
646	P22102	GART Trifunctional purine biosynthetic protein adenosin	GART	K.VLEFNC*R.F		1.26	0.95		1.08621	0.95	2	1.0181	0.0963128	0.0946002	0.0258842
591	P83881	RPL36A 60S ribosomal protein L36a	RPL36A	R.LEC*VEPNC*R.S	0.93	1.44	0.92	0.894231	1.24138	0.92	3	1.01854	0.193417	0.189897	0.026498
811	Q06323	PSME1 Proteasome activator complex subunit 1	PSME1	K.VDVFREDLC*TK.T	1.04	1.18	1.04	1	1.01724	1.04	3	1.01908	0.0200633	0.0196877	0.027268
812	Q16576	RBBP7 Histone-binding protein RBBP7	RBBP7	R.VHIPNDDAQFDASHC*DSDKGEFGGFGSVTGK.I	0.99	1.24	1.04	0.951923	1.06897	1.04	3	1.0203	0.0609583	0.0597457	0.028988
780	Q15005	SPCS2 Signal peptidase complex subunit 2	SPCS2	R.SGGSGGC*SGAGGASNC*GTGSGR.S	0.68	1.61	1.02	0.653846	1.38793	1.02	3	1.02059	0.367043	0.359637	0.0294068
408	P22234	PAICS Multifunctional protein ADE2	PAICS	K.ITSC*IFQLLQEAGIK.T	1.26		0.83	1.21154		0.83	2	1.02077	0.269788	0.264299	0.0296567
555	P14866	HNRNPL Heterogeneous nuclear ribonucleoprotein L	HNRNPL	K.ASLNGADIYSGC*CTLK.I	1.03	1.36	0.9	0.990385	1.17241	0.9	3	1.02093	0.138752	0.135907	0.0298879
865	P52272	HNRNPM Heterogeneous nuclear ribonucleoprotein M	HNRNPM	K.AC*QIFVR.N	0.84	1.39	1.06	0.807692	1.19828	1.06	3	1.02199	0.198047	0.193785	0.0313802
756	Q13308	PTK7 Inactive tyrosine-protein kinase 7	PTK7	R.NC*LVSAQR.Q		1.2	1.01		1.03448	1.01	2	1.02224	0.0173119	0.0169353	0.0317359
814	P52597	HNRNPF Heterogeneous nuclear ribonucleoprotein F	HNRNPF	R.DLSYC*LSGMYDHR.Y	0.9	1.35	1.04	0.865385	1.16379	1.04	3	1.02306	0.149924	0.146545	0.0328897
1065	P13639	EEF2 Elongation factor 2	EEF2	K.DLEEDHAC*IPIKK.S	0.78	1.31	1.19	0.75	1.12931	1.19	3	1.0231	0.238453	0.233069	0.032952
719	Q9BQ52	ELAC2 Zinc phosphodiesterase ELAC protein 2	ELAC2	K.VC*FGDFPTMPK.L		1.23	0.99		1.06034	0.99	2	1.02517	0.0497413	0.0485199	0.0358666
993	Q2TAA2	IAH1 Isoamyl acetate-hydrolyzing esterase 1 homolog	IAH1	R.VILITPTPLC*ETAWEEQCIIQGCK.L	1.35	0.74	1.14	1.29808	0.637931	1.14	3	1.02534	0.344687	0.33617	0.0360967
792	Q9UL46	PSME2 Proteasome activator complex subunit 2	PSME2	K.C*GFLPGNEK.V	1.08	1.17	1.03	1.03846	1.00862	1.03	3	1.02569	0.0153794	0.0149941	0.0366005
983	Q15021	NCAPD2 Condensin complex subunit 1	NCAPD2	K.MNC*YALIR.L		1.07	1.13		0.922414	1.13	2	1.02621	0.146786	0.143037	0.0373216
529	P07814	EPRS Bifunctional glutamate/proline--tRNA ligase	EPRS	K.LNQWC*NVVR.W		1.35	0.89		1.16379	0.89	2	1.0269	0.193601	0.18853	0.0382909
775	Q7L266	ASRGL1 Isoaspartyl peptidase/L-asparaginase	ASRGL1	K.GAQKTDC*QK.N	1.07	1.2	1.02	1.02885	1.03448	1.02	3	1.02778	0.00730041	0.00710311	0.0395263
774	Q9NUL3	STAU2 Double-stranded RNA-binding protein Staufen homolo	STAU2	K.GSSPTPPC*SPVQPSK.Q	1.07	1.2	1.02	1.02885	1.03448	1.02	3	1.02778	0.00730041	0.00710311	0.0395263
984	P46779	RPL28 60S ribosomal protein L28	RPL28	R.NC*SSFLIK.R	1.02	1.13	1.13	0.980769	0.974138	1.13	3	1.0283	0.0881351	0.0857093	0.0402646
696	Q8WX93	PALLD Palladin	PALLD	K.VSSC*EQR.L	1.23	1.07	0.98	1.18269	0.922414	0.98	3	1.02837	0.136715	0.132943	0.0403576
901	Q15365	PCBP1 Poly(rC)-binding protein 1	PCBP1	R.LVVPATQC*GSLIGK.G	1.01	1.2	1.08	0.971154	1.03448	1.08	3	1.02855	0.0546654	0.0531483	0.0406057
1128	O60610	DIAPH1 Protein diaphanous homolog 1	DIAPH1	K.LLSALC*ILPQPEDMNER.V		0.96	1.23		0.827586	1.23	2	1.02879	0.28455	0.276586	0.0409529
743	Q99832	CCT7 T-complex protein 1 subunit eta	CCT7	R.INALTAASEAAC*LIVSVDETIKNPR.S	1.1		1	1.05769		1	2	1.02885	0.0407946	0.0396508	0.0410273
1009	Q96GX9	APIP Methylthioribulose-1-phosphate dehydratase	APIP	R.C*GAQDKEHPR.Y	1.03	1.1	1.15	0.990385	0.948276	1.15	3	1.02955	0.106413	0.103359	0.0420188
771	Q9Y3C1	NOP16 Nucleolar protein 16	NOP16	R.IEC*SHIR.H	1.14	1.13	1.02	1.09615	0.974138	1.02	3	1.0301	0.0616315	0.0598307	0.0427806
1173	Q15796	SMAD2 Mothers against decapentaplegic homolog 2	SMAD2	K.AITTQNC*NTK.C		0.92	1.27		0.793103	1.27	2	1.03155	0.337217	0.326902	0.0448162
839	Q06587	RING1 E3 ubiquitin-protein ligase RING1	RING1	K.GEYC*QTR.Y	0.71	1.58	1.05	0.682692	1.36207	1.05	3	1.03159	0.340062	0.32965	0.0448656
667	Q00610	CLTC Clathrin heavy chain 1	CLTC	K.VIQC*FAETGQVQK.I		1.28	0.96		1.10345	0.96	2	1.03172	0.101433	0.0983143	0.0450573
744	Q08AG7	MZT1 Mitotic-spindle organizing protein 1	MZT1	R.LC*EQGINPEALSSVIK.E	1.11		1	1.06731		1	2	1.03365	0.0475937	0.0460442	0.0477531
777	P04350	TUBB4A Tubulin beta-4A chain	TUBB4A	K.LTTPTYGDLNHLVSATMSGVTTC*LR.F	1.03	1.27	1.02	0.990385	1.09483	1.02	3	1.03507	0.0538278	0.052004	0.0497294
757	Q96QK1	VPS35 Vacuolar protein sorting-associated protein 35	VPS35	R.TQC*ALAASK.L		1.23	1.01		1.06034	1.01	2	1.03517	0.0355992	0.0343896	0.0498711
556	P46013	MKI67 Proliferation marker protein Ki-67	MKI67	R.KADVEGELLAC*R.N		1.36	0.9		1.17241	0.9	2	1.03621	0.192626	0.185895	0.0513121
861	Q9Y2S7	POLDIP2 Polymerase delta-interacting protein 2	POLDIP2	R.DC*PHISQR.S	1.02	1.24	1.06	0.980769	1.06897	1.06	3	1.03658	0.0485395	0.0468266	0.051829
611	P78316	NOP14 Nucleolar protein 14	NOP14	K.C*NHPSLAEGNK.A	1.19		0.93	1.14423		0.93	2	1.03712	0.151484	0.146063	0.0525764
1057	P52597	HNRNPF Heterogeneous nuclear ribonucleoprotein F	HNRNPF	R.YGDSEFTVQSTTGHC*VHMR.G	0.93		1.18	0.894231		1.18	2	1.03712	0.202069	0.194838	0.0525764
665	Q13283	G3BP1 Ras GTPase-activating protein-binding protein 1	G3BP1	K.VMSQNFTNC*HTK.I	1.12	1.25	0.96	1.07692	1.07759	0.96	3	1.03817	0.0676978	0.0652088	0.0540424
862	Q9UKX7	NUP50 Nuclear pore complex protein Nup50	NUP50	K.AC*VGNAYHK.Q	1.01	1.26	1.06	0.971154	1.08621	1.06	3	1.03912	0.0603015	0.0580313	0.0553626
899	P49207	RPL34 60S ribosomal protein L34	RPL34	K.SACGVC*PGR.L		1.16	1.08		1	1.08	2	1.04	0.0565685	0.0543928	0.0565835
778	O96008	TOMM40 Mitochondrial import receptor subunit TOM40 homolo	TOMM40	R.TPGAATASASGAAEDGAC*GCLPNPGTFEECHR.K	1.01	1.31	1.02	0.971154	1.12931	1.02	3	1.04015	0.0809817	0.0778554	0.0567982
740	B0I1T2	MYO1G Unconventional myosin-Ig	MYO1G	R.SRDTC*IVISGESGAGK.T	1.06	1.28	1	1.01923	1.10345	1	3	1.04089	0.0550211	0.0528596	0.0578218
562	O75914	PAK3 Serine/threonine-protein kinase PAK 3	PAK3	K.LTDFGFC*AQITPEQSKR.S	1.23		0.9	1.18269		0.9	2	1.04135	0.199894	0.191957	0.0584497
974	Q52LJ0	FAM98B Protein FAM98B	FAM98B	R.INDALSC*EYECR.R	0.94	1.28	1.12	0.903846	1.10345	1.12	3	1.04243	0.120303	0.115407	0.0599526
998	Q9NYK5	MRPL39 39S ribosomal protein L39, mitochondrial	MRPL39	K.FLTFKDC*DPGEVNK.A	0.94	1.26	1.14	0.903846	1.08621	1.14	3	1.04335	0.123772	0.11863	0.0612246
813	B0I1T2	MYO1G Unconventional myosin-Ig	MYO1G	R.QLC*PTDKTMEFGR.D	1.01	1.3	1.04	0.971154	1.12069	1.04	3	1.04395	0.074846	0.0716952	0.0620496
943	Q9Y277	VDAC3 Voltage-dependent anion-selective channel protein	VDAC3	K.SC*SGVEFSTSGHAYTDTGK.A	0.93	1.32	1.1	0.894231	1.13793	1.1	3	1.04405	0.131129	0.125596	0.0621962
989	P68104	EEF1A1 Elongation factor 1-alpha 1	EEF1A1	K.PMC*VESFSDYPPLGR.F	0.9	1.32	1.13	0.865385	1.13793	1.13	3	1.04444	0.155116	0.148516	0.0627276
896	P62888	RPL30 60S ribosomal protein L30	RPL30	K.LVILANNC*PALR.K	1.36	0.87	1.08	1.30769	0.75	1.08	3	1.0459	0.280406	0.268101	0.0647414
883	Q9Y277	VDAC3 Voltage-dependent anion-selective channel protein	VDAC3	K.ASGNLETKYKVC*NYGLTFTQK.W	0.95	1.34	1.07	0.913462	1.15517	1.07	3	1.04621	0.122599	0.117184	0.0651743
860	P04899	GNAI2 Guanine nucleotide-binding protein G(i) subunit al	GNAI2	K.NNLKDC*GLF.-	1.06	1.23	1.06	1.01923	1.06034	1.06	3	1.04653	0.0236383	0.0225874	0.0656071
972	Q92973	TNPO1 Transportin-1	TNPO1	K.DDLRDMFC*K.I		1.13	1.12		0.974138	1.12	2	1.04707	0.10314	0.0985036	0.0663565
666	Q96QK1	VPS35 Vacuolar protein sorting-associated protein 35	VPS35	K.C*FSEENHEPLR.T	1.15	1.25	0.96	1.10577	1.07759	0.96	3	1.04779	0.0773191	0.0737929	0.0673429
657	Q08211	DHX9 ATP-dependent RNA helicase A	DHX9	K.SSVNC*PFSSQDMK.Y	1.34	1.04	0.96	1.28846	0.896552	0.96	3	1.04834	0.210359	0.20066	0.0681036
401	Q99832	CCT7 T-complex protein 1 subunit eta	CCT7	R.QLC*DNAGFDATNILNK.L	1.19	1.36	0.83	1.14423	1.17241	0.83	3	1.04888	0.19008	0.181222	0.0688517
1097	Q9UBB4	ATXN10 Ataxin-10	ATXN10	K.ETTNIFSNC*GCVR.A		1.03	1.21		0.887931	1.21	2	1.04897	0.227737	0.217106	0.0689673
1011	P50990	CCT8 T-complex protein 1 subunit theta	CCT8	K.IAVYSC*PFDGMITETK.G	1.01	1.19	1.15	0.971154	1.02586	1.15	3	1.04901	0.0916417	0.0873605	0.069022
1221	P38117	ETFB Electron transfer flavoprotein subunit beta	ETFB	K.HSMNPFC*EIAVEEAVR.L	0.83		1.3	0.798077		1.3	2	1.04904	0.354913	0.338322	0.0690676
794	P17987	TCP1 T-complex protein 1 subunit alpha	TCP1	R.IC*DDELILIK.N	1.1	1.23	1.03	1.05769	1.06034	1.03	3	1.04935	0.0168063	0.016016	0.0694901
1025	P52272	HNRNPM Heterogeneous nuclear ribonucleoprotein M	HNRNPM	R.GC*AVVEFK.M		1.09	1.16		0.939655	1.16	2	1.04983	0.155807	0.148412	0.0701524
461	P46734	MAP2K3 Dual specificity mitogen-activated protein kinase	MAP2K3	K.MC*DFGISGYLVDSVAK.T		1.44	0.86		1.24138	0.86	2	1.05069	0.269676	0.256666	0.0713366
905	P46734	MAP2K3 Dual specificity mitogen-activated protein kinase	MAP2K3	K.TMDAGC*KPYMAPER.I	1	1.29	1.08	0.961538	1.11207	1.08	3	1.0512	0.0792895	0.0754275	0.0720406
835	P17987	TCP1 T-complex protein 1 subunit alpha	TCP1	R.DC*LINAAK.T	0.96	1.37	1.05	0.923077	1.18103	1.05	3	1.05137	0.128984	0.122682	0.0722711
644	Q9HB71	CACYBP Calcyclin-binding protein	CACYBP	K.TDTVLILC*R.K	1.19	1.23	0.95	1.14423	1.06034	0.95	3	1.05153	0.0974153	0.0926419	0.0724834
833	P23396	RPS3 40S ribosomal protein S3	RPS3	R.AC*YGVLR.F	0.97	1.36	1.05	0.932692	1.17241	1.05	3	1.0517	0.11987	0.113977	0.072726
779	P36578	RPL4 60S ribosomal protein L4	RPL4	R.YAIC*SALAASALPALVMSK.G	1.03	1.33	1.02	0.990385	1.14655	1.02	3	1.05231	0.0829463	0.0788229	0.0735627
745	Q15020	SART3 Squamous cell carcinoma antigen recognized by T-ce	SART3	R.AHGDTQHC*R.K	1.15		1	1.10577		1	2	1.05288	0.0747901	0.0710336	0.0743473
1166	Q96HE7	ERO1A ERO1-like protein alpha	ERO1A	K.HDDSSDNFC*EADDIQSPEAEYVDLLLNPER.Y	0.88		1.26	0.846154		1.26	2	1.05308	0.292633	0.277884	0.0746108
819	P55265	ADAR Double-stranded RNA-specific adenosine deaminase	ADAR	K.SPVTTLLEC*MHK.L	1.11		1.04	1.06731		1.04	2	1.05365	0.0193095	0.0183262	0.075401
917	P78371	CCT2 T-complex protein 1 subunit beta	CCT2	R.SLHDALC*VLAQTVK.D	1.07		1.08	1.02885		1.08	2	1.05442	0.0361712	0.0343043	0.0764539
964	Q9UJX3	ANAPC7 Anaphase-promoting complex subunit 7	ANAPC7	R.AISTIC*SLEK.K	1.04		1.11	1		1.11	2	1.055	0.0777817	0.0737268	0.077243
1018	Q9NX70	MED29 Mediator of RNA polymerase II transcription subuni	MED29	K.DIHTALLDC*ANK.V	1		1.15	0.961538		1.15	2	1.05577	0.133262	0.126223	0.0782945
902	O14929	HAT1 Histone acetyltransferase type B catalytic subunit	HAT1	K.LCQDLPC*FSR.E	1.07	1.23	1.08	1.02885	1.06034	1.08	3	1.0564	0.0258044	0.0244268	0.0791521
878	P35611	ADD1 Alpha-adducin	ADD1	K.YSDVEVPASVTGYSFASDGDSGTC*SPLR.H		1.21	1.07		1.0431	1.07	2	1.05655	0.0190187	0.0180008	0.0793634
877	Q99873	PRMT1 Protein arginine N-methyltransferase 1	PRMT1	K.QLVTNAC*LIK.E		1.21	1.07		1.0431	1.07	2	1.05655	0.0190187	0.0180008	0.0793634
1036	P15121	AKR1B1 Aldose reductase	AKR1B1	R.VC*ALLSCTSHK.D	1.06	1.14	1.17	1.01923	0.982759	1.17	3	1.05733	0.0992647	0.0938825	0.0804254
864	Q13308	PTK7 Inactive tyrosine-protein kinase 7	PTK7	R.LPQPEGC*PSK.L	1.04	1.29	1.06	1	1.11207	1.06	3	1.05736	0.0560812	0.0530391	0.0804616
918	P35606	COPB2 Coatomer subunit beta	COPB2	K.DMGSC*EIYPQTIQHNPNGR.F	1.08		1.08	1.03846		1.08	2	1.05923	0.0293721	0.0277297	0.0830169
882	P60763	RAC3 Ras-related C3 botulinum toxin substrate 3	RAC3	R.AVLC*PPPVK.K	1.03	1.3	1.07	0.990385	1.12069	1.07	3	1.06036	0.0656854	0.0619465	0.0845516
531	Q92556	ELMO1 Engulfment and cell motility protein 1	ELMO1	K.AVVTGKDC*PHMK.E	1.28		0.89	1.23077		0.89	2	1.06038	0.24096	0.227239	0.0845876
1080	Q9NX24	NHP2 H/ACA ribonucleoprotein complex subunit 2	NHP2	K.ADPDGPEAQAEAC*SGER.T	1.04	1.14	1.2	1	0.982759	1.2	3	1.06092	0.120755	0.113821	0.0853152
702	Q7Z7C8	TAF8 Transcription initiation factor TFIID subunit 8	TAF8	K.SYC*EHTAR.T	1.12	1.31	0.98	1.07692	1.12931	0.98	3	1.06208	0.0757541	0.0713263	0.0868895
708	P20073	ANXA7 Annexin A7	ANXA7	R.LLVSMC*QGNR.D	1.19		0.98	1.14423		0.98	2	1.06212	0.116129	0.109337	0.0869405
858	Q7Z6Z7	HUWE1 E3 ubiquitin-protein ligase HUWE1	HUWE1	K.LC*VGSPVR.Q	1.21	1.12	1.06	1.16346	0.965517	1.06	3	1.06299	0.0990061	0.093139	0.088132
338	Q13200	PSMD2 26S proteasome non-ATPase regulatory subunit 2	PSMD2	K.GTLTLC*PYHSDR.Q	1.39		0.79	1.33654		0.79	2	1.06327	0.386461	0.363465	0.0885069
1213	P42224	STAT1 Signal transducer and activator of transcription 1	STAT1	K.DKVMC*IEHEIK.S	1.24	0.81	1.3	1.19231	0.698276	1.3	3	1.06353	0.320868	0.301701	0.0888578
1291	P56537	EIF6 Eukaryotic translation initiation factor 6	EIF6	R.ASFENNCEIGC*FAK.L		0.89	1.36		0.767241	1.36	2	1.06362	0.419144	0.394072	0.0889837
1214	Q15365	PCBP1 Poly(rC)-binding protein 1	PCBP1	R.LSSEKGMGC*S.-		0.96	1.3		0.827586	1.3	2	1.06379	0.334047	0.314015	0.0892176
348	P63241	EIF5A Eukaryotic translation initiation factor 5A-1	EIF5A	K.KYEDIC*PSTHNMDVPNIK.R	1.52	1.08	0.8	1.46154	0.931034	0.8	3	1.06419	0.350295	0.329165	0.0897571
977	P55084	HADHB Trifunctional enzyme subunit beta, mitochondrial	HADHB	K.EGGQYGLVAAC*AAGGQGHAMIVEAYPK.-	1.05		1.12	1.00962		1.12	2	1.06481	0.0780537	0.0733031	0.0905929
627	Q92797	SYMPK Symplekin	SYMPK	R.KYC*EDESR.T		1.38	0.94		1.18966	0.94	2	1.06483	0.176533	0.165785	0.0906199
761	P62266	RPS23 40S ribosomal protein S23	RPS23	K.ITAFVPNDGC*LNFIEENDEVLVAGFGR.K	0.99	1.43	1.01	0.951923	1.23276	1.01	3	1.06489	0.148247	0.139213	0.0907097
1019	Q6P4A7	SFXN4 Sideroflexin-4	SFXN4	R.SYTC*KPLER.S	1.02		1.15	0.980769		1.15	2	1.06538	0.119664	0.11232	0.0913744
1564	O75152	ZC3H11A Zinc finger CCCH domain-containing protein 11A	ZC3H11A	R.GDVASC*NTQVAEKPVLTAVPGITR.H	0.89	1.48		0.855769	1.27586		2	1.06582	0.29705	0.278707	0.0919579
924	Q00534	CDK6 Cyclin-dependent kinase 6	CDK6	R.LFDVC*TVSR.T		1.21	1.09		1.0431	1.09	2	1.06655	0.0331609	0.0310917	0.0929539
689	Q96P16	RPRD1A Regulation of nuclear pre-mRNA domain-containing p	RPRD1A	K.HVSSETDESC*KK.H	1.21		0.97	1.16346		0.97	2	1.06673	0.136798	0.12824	0.0931961
1125	Q13547	HDAC1 Histone deacetylase 1	HDAC1	R.LGC*FNLTIK.G	0.95		1.22	0.913462		1.22	2	1.06673	0.216755	0.203196	0.0931961
661	B5ME19	EIF3CL Eukaryotic translation initiation factor 3 subunit	EIF3CL	K.TC*HSFIINEK.M	1.29	1.16	0.96	1.24038	1	0.96	3	1.06679	0.151658	0.142162	0.0932828
866	Q6NZY4	ZCCHC8 Zinc finger CCHC domain-containing protein 8	ZCCHC8	R.IFGSIPMQAC*QQK.D	0.98	1.39	1.06	0.942308	1.19828	1.06	3	1.06686	0.128122	0.120092	0.0933725
1026	Q86YP4	GATAD2A Transcriptional repressor p66-alpha	GATAD2A	K.TDFTC*R.W		1.13	1.16		0.974138	1.16	2	1.06707	0.131424	0.123164	0.0936534
722	Q9HAV7	GRPEL1 GrpE protein homolog 1, mitochondrial	GRPEL1	K.LYGIQAFC*K.D	1.19		0.99	1.14423		0.99	2	1.06712	0.109058	0.102199	0.0937162
836	Q9NVU0	POLR3E DNA-directed RNA polymerase III subunit RPC5	POLR3E	R.AAGTDSFNGHPPQGC*ASTPVAR.E	1.01	1.37	1.05	0.971154	1.18103	1.05	3	1.0674	0.106016	0.0993223	0.0940957
387	Q92783	STAM Signal transducing adapter molecule 1	STAM	R.TGPKDC*LR.S		1.53	0.82		1.31897	0.82	2	1.06948	0.352822	0.3299	0.0969132
758	P36873	PPP1CC Serine/threonine-protein phosphatase PP1-gamma cat	PPP1CC	R.GNHEC*ASINR.I	1.05	1.38	1.01	1.00962	1.18966	1.01	3	1.06976	0.103835	0.0970643	0.0972829
1174	P62826	RAN GTP-binding nuclear protein Ran	RAN	R.VC*ENIPIVLCGNK.V	1.07	1.06	1.27	1.02885	0.913793	1.27	3	1.07088	0.181785	0.169753	0.0987965
903	P57721	PCBP3 Poly(rC)-binding protein 3	PCBP3	R.LVVPASQC*GSLIGK.G	1.08	1.27	1.08	1.03846	1.09483	1.08	3	1.0711	0.0292188	0.0272793	0.0990883
1027	Q96GG9	DCUN1D1 DCN1-like protein 1	DCUN1D1	R.AATQC*EFSK.Q		1.14	1.16		0.982759	1.16	2	1.07138	0.125329	0.116979	0.0994693
571	P33991	MCM4 DNA replication licensing factor MCM4	MCM4	K.AGIIC*QLNAR.T	1.16	1.38	0.91	1.11538	1.18966	0.91	3	1.07168	0.14486	0.135171	0.0998741
801	Q9GZR2	REXO4 RNA exonuclease 4	REXO4	K.ILGLQVQQAEHC*SIQDAQAAMR.L	1.16		1.03	1.11538		1.03	2	1.07269	0.060376	0.0562846	0.101236
863	O60547	GMDS GDP-mannose 4,6 dehydratase	GMDS	K.YYRPTEVDFLQGDC*TK.A		1.26	1.06		1.08621	1.06	2	1.0731	0.0185311	0.0172687	0.101789
378	Q96PK6	RBM14 RNA-binding protein 14	RBM14	K.IFVGNVSAAC*TSQELR.S	1.39		0.81	1.33654		0.81	2	1.07327	0.372319	0.346902	0.102012
1543	P08670	VIM Vimentin	VIM	R.QVQSLTC*EVDALKGTNESLER.Q	1.13	1.23		1.08654	1.06034		2	1.07344	0.0185217	0.0172545	0.102244
791	A0A075B759	PPIAL4E Peptidyl-prolyl cis-trans isomerase A-like 4E	PPIAL4E	K.GSC*FHR.I	1.24	1.16	1.03	1.19231	1	1.03	3	1.0741	0.103462	0.0963239	0.103132
316	Q00839	HNRNPU Heterogeneous nuclear ribonucleoprotein U	HNRNPU	K.GNFTLPEVAEC*FDEITYVELQK.E	1.45	1.22	0.78	1.39423	1.05172	0.78	3	1.07532	0.307794	0.286236	0.104764
776	Q15050	RRS1 Ribosome biogenesis regulatory protein homolog	RRS1	R.C*AGPTPEAELQALAR.D	1.21	1.21	1.02	1.16346	1.0431	1.02	3	1.07552	0.0770293	0.0716204	0.105037
940	P50914	RPL14 60S ribosomal protein L14	RPL14	R.ALVDGPC*TQVR.R	1.1	1.24	1.1	1.05769	1.06897	1.1	3	1.07555	0.0219095	0.0203705	0.105078
755	P18621	RPL17 60S ribosomal protein L17	RPL17	R.YNGGVGRC*AQAK.Q	1.27	1.16	1.01	1.22115	1	1.01	3	1.07705	0.124897	0.115962	0.107087
941	P26599	PTBP1 Polypyrimidine tract-binding protein 1	PTBP1	K.LSLDGQNIYNAC*CTLR.I	1.06	1.29	1.1	1.01923	1.11207	1.1	3	1.0771	0.0504781	0.0468649	0.107152
802	Q7L1Q6	BZW1 Basic leucine zipper and W2 domain-containing prot	BZW1	K.ERFDPTQFQDC*IIQGLTETGTDLEAVAK.F	1.17		1.03	1.125		1.03	2	1.0775	0.0671751	0.0623435	0.107688
1182	P00558	PGK1 Phosphoglycerate kinase 1	PGK1	R.GCITIIGGGDTATC*C*AK.W	1.09	1.05	1.28	1.04808	0.905172	1.28	3	1.07775	0.189167	0.175521	0.108022
797	P45880	VDAC2 Voltage-dependent anion-selective channel protein	VDAC2	R.PMC*IPPSYADLGK.A	1.02	1.42	1.03	0.980769	1.22414	1.03	3	1.0783	0.128674	0.11933	0.108762
830	Q5JTH9	RRP12 RRP12-like protein	RRP12	K.GHSSDSNPAIC*R.H	1.09	1.32	1.05	1.04808	1.13793	1.05	3	1.07867	0.0513312	0.0475875	0.109253
1093	O60610	DIAPH1 Protein diaphanous homolog 1	DIAPH1	K.AGC*AVTSLLASELTK.D	1		1.2	0.961538		1.2	2	1.08077	0.168618	0.156016	0.112059
955	P49588	AARS Alanine--tRNA ligase, cytoplasmic	AARS	K.C*LSVMEAK.V	1.09	1.26	1.11	1.04808	1.08621	1.11	3	1.08143	0.0312369	0.0288849	0.112938
880	P12004	PCNA Proliferating cell nuclear antigen	PCNA	K.C*AGNEDIITLR.A		1.27	1.07		1.09483	1.07	2	1.08241	0.0175558	0.0162191	0.114252
1111	Q7Z5K2	WAPL Wings apart-like protein homolog	WAPL	K.KGGVSC*GTSFR.G	0.97	1.27	1.22	0.932692	1.09483	1.22	3	1.08251	0.14405	0.13307	0.114376
1198	O75940	SMNDC1 Survival of motor neuron-related-splicing factor 3	SMNDC1	K.VGVGTC*GIADKPMTQYQDTSK.Y	1.03	1.13	1.29	0.990385	0.974138	1.29	3	1.08484	0.177859	0.163949	0.117483
1557	Q9Y3E2	BOLA1 BolA-like protein 1	BOLA1	R.VC*LCQGSAGSGAIGPVEAAIR.T	1.03	1.37		0.990385	1.18103		2	1.08571	0.13481	0.124167	0.118638
1562	Q7Z2W4	ZC3HAV1 Zinc finger CCCH-type antiviral protein 1	ZC3HAV1	R.SC*TPSPDQISHR.A	0.97	1.44		0.932692	1.24138		2	1.08704	0.218275	0.200798	0.120399
958	O43865	AHCYL1 S-adenosylhomocysteine hydrolase-like protein 1	AHCYL1	K.AGKLC*VPAMNVNDSVTK.Q	1	1.38	1.11	0.961538	1.18966	1.11	3	1.08706	0.115775	0.106502	0.120438
1037	Q99439	CNN2 Calponin-2	CNN2	K.AGQC*VIGLQMGTNK.C	1.02	1.29	1.17	0.980769	1.11207	1.17	3	1.08761	0.096957	0.0891466	0.121165
1081	P46109	CRKL Crk-like protein	CRKL	K.RVPC*AYDK.T	1.04	1.24	1.2	1	1.06897	1.2	3	1.08966	0.101593	0.0932337	0.123872
1094	P49321	NASP Nuclear autoantigenic sperm protein	NASP	R.KPTDGASSSNC*VTDISHLVR.K	1.02		1.2	0.980769		1.2	2	1.09038	0.15502	0.14217	0.124837
690	O60610	DIAPH1 Protein diaphanous homolog 1	DIAPH1	K.LQFSEQVENIKPEIVSVTAAC*EELRK.S	1.26		0.97	1.21154		0.97	2	1.09077	0.170793	0.156581	0.125346
881	Q8WW01	TSEN15 tRNA-splicing endonuclease subunit Sen15	TSEN15	R.GDSEPTPGC*SGLGPGGVR.G		1.29	1.07		1.11207	1.07	2	1.09103	0.0297473	0.0272652	0.125697
834	P36578	RPL4 60S ribosomal protein L4	RPL4	R.FC*IWTESAFR.K	1.1	1.36	1.05	1.05769	1.17241	1.05	3	1.09337	0.068563	0.0627081	0.12878
978	Q9UN86	G3BP2 Ras GTPase-activating protein-binding protein 2	G3BP2	K.VLSLNFSEC*HTK.I	1.11		1.12	1.06731		1.12	2	1.09365	0.0372591	0.0340684	0.129156
1001	Q15631	TSN Translin	TSN	R.GFNKETAAAC*VEK.-	0.97	1.41	1.14	0.932692	1.21552	1.14	3	1.09607	0.146441	0.133605	0.13234
889	B0I1T2	MYO1G Unconventional myosin-Ig	MYO1G	R.C*IKPNEDKVAGK.L	1.17		1.07	1.125		1.07	2	1.0975	0.0388909	0.0354359	0.134221
1004	Q5TFE4	NT5DC1 5-nucleotidase domain-containing protein 1	NT5DC1	K.HFLSDTGMAC*R.S	1.1		1.14	1.05769		1.14	2	1.09885	0.0582003	0.0529649	0.135989
986	Q15052	ARHGEF6 Rho guanine nucleotide exchange factor 6	ARHGEF6	K.ATEDQLSERPC*GR.S		1.24	1.13		1.06897	1.13	2	1.09948	0.0431579	0.0392529	0.136825
1058	P07814	EPRS Bifunctional glutamate/proline--tRNA ligase	EPRS	R.VAC*VQVVIIPCGITNALSEEDKEALIAK.C	1.06		1.18	1.01923		1.18	2	1.09962	0.113681	0.103383	0.136999
1074	O60547	GMDS GDP-mannose 4,6 dehydratase	GMDS	K.LHYGDLTDSTC*LVK.I	1.05		1.19	1.00962		1.19	2	1.09981	0.127551	0.115976	0.137251
906	P08754	GNAI3 Guanine nucleotide-binding protein G(k) subunit al	GNAI3	K.NNLKEC*GLY.-		1.3	1.08		1.12069	1.08	2	1.10034	0.0287719	0.0261481	0.137956
1305	P31153	MAT2A S-adenosylmethionine synthase isoform type-2	MAT2A	K.VAC*ETVAK.T	0.86	1.27	1.38	0.826923	1.09483	1.38	3	1.10058	0.276583	0.251306	0.138269
1184	P49589	CARS Cysteine--tRNA ligase, cytoplasmic	CARS	R.VQPQWSPPAGTQPC*R.L	0.93	1.31	1.28	0.894231	1.12931	1.28	3	1.10118	0.194417	0.176553	0.139051
589	Q12788	TBL3 Transducin beta-like protein 3	TBL3	R.RDPEAC*EKLEATMLR.L	1.36	1.25	0.92	1.30769	1.07759	0.92	3	1.10176	0.194973	0.176965	0.139809
1069	Q9UL25	RAB21 Ras-related protein Rab-21	RAB21	K.VVLLGEGC*VGK.T	0.99	1.35	1.19	0.951923	1.16379	1.19	3	1.10191	0.130548	0.118475	0.14
831	Q6P2E9	EDC4 Enhancer of mRNA-decapping protein 4	EDC4	K.SC*QAMFQQINDSFR.L		1.34	1.05		1.15517	1.05	2	1.10259	0.0743681	0.0674488	0.140891
930	Q6NUQ4	TMEM214 Transmembrane protein 214	TMEM214	R.SSGFLPASQQAC*AK.L	1.16		1.09	1.11538		1.09	2	1.10269	0.0179496	0.016278	0.14103
372	Q9Y4W2	LAS1L Ribosomal biogenesis protein LAS1L	LAS1L	K.GVTC*ENR.E		1.62	0.81		1.39655	0.81	2	1.10328	0.414755	0.37593	0.141794
1084	Q9UBB4	ATXN10 Ataxin-10	ATXN10	R.HAELIASTFVDQC*K.T	1.04	1.29	1.2	1	1.11207	1.2	3	1.10402	0.100242	0.0907975	0.14277
759	P04439	HLA-A HLA class I histocompatibility antigen, A-3 alpha	HLA-A	R.KGGSYTQAASSDSAQGSDVSLTAC*KV.-		1.39	1.01		1.19828	1.01	2	1.10414	0.133131	0.120575	0.14292
760	Q06210	GFPT1 Glutamine--fructose-6-phosphate aminotransferase [	GFPT1	K.KGSC*NLSR.V		1.39	1.01		1.19828	1.01	2	1.10414	0.133131	0.120575	0.14292
1361	P62241	RPS8 40S ribosomal protein S8	RPS8	R.LDVGNFSWGSEC*CTR.K	0.62	1.45	1.47	0.596154	1.25	1.47	3	1.10538	0.454518	0.411186	0.144548
528	P08133	ANXA6 Annexin A6	ANXA6	R.QRQEVC*QSYK.S	1.36	1.3	0.89	1.30769	1.12069	0.89	3	1.10613	0.209227	0.189152	0.145517
832	P48643	CCT5 T-complex protein 1 subunit epsilon	CCT5	K.VVNSC*HR.Q		1.35	1.05		1.16379	1.05	2	1.1069	0.0804639	0.0726932	0.14652
909	Q07020	RPL18 60S ribosomal protein L18	RPL18	K.GC*GTVLLSGPR.K	1.13	1.34	1.08	1.08654	1.15517	1.08	3	1.10724	0.0416419	0.0376088	0.146964
931	P37802	TAGLN2 Transgelin-2	TAGLN2	K.DGTVLC*ELINALYPEGQAPVKK.I	1.17		1.09	1.125		1.09	2	1.1075	0.0247487	0.0223465	0.147307
1286	P09110	ACAA1 3-ketoacyl-CoA thiolase, peroxisomal	ACAA1	K.ARDC*LIPMGITSENVAER.F	0.9		1.35	0.865385		1.35	2	1.10769	0.342675	0.309359	0.147557
1098	P13639	EEF2 Elongation factor 2	EEF2	R.FTDTRKDEQERC*ITIK.S	0.97	1.37	1.21	0.932692	1.18103	1.21	3	1.10791	0.152432	0.137585	0.147839
910	Q00610	CLTC Clathrin heavy chain 1	CLTC	R.AHIAQLC*EK.A	1.07	1.41	1.08	1.02885	1.21552	1.08	3	1.10812	0.0964605	0.0870487	0.148116
956	Q9NW64	RBM22 Pre-mRNA-splicing factor RBM22	RBM22	R.WC*PGVR.M	1.13	1.31	1.11	1.08654	1.12931	1.11	3	1.10862	0.0214195	0.0193209	0.14876
1185	Q6P2E9	EDC4 Enhancer of mRNA-decapping protein 4	EDC4	R.LC*TQLEGLQSTVTGHVER.A	0.91	1.36	1.28	0.875	1.17241	1.28	3	1.10914	0.209784	0.189141	0.149439
624	P12236	SLC25A6 ADP/ATP translocase 3	SLC25A6	K.GIVDC*IVR.I	1.46	1.15	0.94	1.40385	0.991379	0.94	3	1.11174	0.254271	0.228714	0.152822
1042	Q3KQU3	MAP7D1 MAP7 domain-containing protein 1	MAP7D1	R.SASASPLTPC*SVTR.S	0.89	1.52	1.17	0.855769	1.31034	1.17	3	1.11204	0.232765	0.209314	0.153206
1072	P24752	ACAT1 Acetyl-CoA acetyltransferase, mitochondrial	ACAT1	R.QAVLGAGLPISTPC*TTINK.V	0.95	1.43	1.19	0.913462	1.23276	1.19	3	1.11207	0.173326	0.155859	0.153252
1258	Q7Z4W1	DCXR L-xylulose reductase	DCXR	R.AVTNHSVYC*STK.G	0.93		1.33	0.894231		1.33	2	1.11212	0.308135	0.277071	0.153306
987	P22102	GART Trifunctional purine biosynthetic protein adenosin	GART	K.QVLVAPGNAGTAC*SEK.I		1.27	1.13		1.09483	1.13	2	1.11241	0.0248707	0.0223574	0.153694
1066	P46776	RPL27A 60S ribosomal protein L27a	RPL27A	K.RNQSFC*PTVNLDK.L	1.06	1.31	1.19	1.01923	1.12931	1.19	3	1.11285	0.0865668	0.0777886	0.154255
879	Q8TD19	NEK9 Serine/threonine-protein kinase Nek9	NEK9	R.LNPAVTC*AGK.G	1.26	1.23	1.07	1.21154	1.06034	1.07	3	1.11396	0.0846423	0.0759831	0.155699
1280	O95299	NDUFA10 NADH dehydrogenase [ubiquinone] 1 alpha subcomplex	NDUFA10	R.KQC*VDHYNEVK.S	1.05	1.14	1.35	1.00962	0.982759	1.35	3	1.11412	0.204715	0.183745	0.155911
1550	Q8TC12	RDH11 Retinol dehydrogenase 11	RDH11	K.MLSSGVC*TSTVQLPGK.V	1.17	1.28		1.125	1.10345		2	1.11422	0.0152394	0.0136771	0.156039
945	Q04637	EIF4G1 Eukaryotic translation initiation factor 4 gamma 1	EIF4G1	R.LQGINC*GPDFTPSFANLGR.T	1.08	1.4	1.1	1.03846	1.2069	1.1	3	1.11512	0.0852293	0.0764307	0.157198
1068	Q9UJX3	ANAPC7 Anaphase-promoting complex subunit 7	ANAPC7	K.VRPSTGNSASTPQSQC*LPSEIEVK.Y	1.05	1.33	1.19	1.00962	1.14655	1.19	3	1.11539	0.0941434	0.0844041	0.157547
1052	Q9UI30	TRMT112 Multifunctional methyltransferase subunit TRM112-l	TRMT112	R.IC*PVEFNPNFVAR.M	1.08	1.31	1.18	1.03846	1.12931	1.18	3	1.11592	0.0717125	0.0642629	0.158239
1194	Q6NXT1	ANKRD54 Ankyrin repeat domain-containing protein 54	ANKRD54	K.LNILQEGHAQC*LEAVR.L	0.99		1.28	0.951923		1.28	2	1.11596	0.231985	0.207879	0.158287
1225	Q16851	UGP2 UTP--glucose-1-phosphate uridylyltransferase	UGP2	K.LNGGLGTSMGC*K.G		1.07	1.31		0.922414	1.31	2	1.11621	0.274065	0.245532	0.158604
843	Q01813	PFKP ATP-dependent 6-phosphofructokinase, platelet type	PFKP	R.NESC*SENYTTDFIYQLYSEEGK.G	1.23		1.05	1.18269		1.05	2	1.11635	0.0938276	0.0840489	0.158784
1110	Q9Y224	C14orf166 UPF0568 protein C14orf166	C14orf166	K.LTALDYHNPAGFNC*K.D	1.31	1.01	1.22	1.25962	0.87069	1.22	3	1.11677	0.214029	0.19165	0.15933
979	Q9BZE1	MRPL37 39S ribosomal protein L37, mitochondrial	MRPL37	R.NHIENQDEC*VLNVISHAR.L	1.16		1.12	1.11538		1.12	2	1.11769	0.00326357	0.00291992	0.160523
1020	P40429	RPL13A 60S ribosomal protein L13a	RPL13A	R.C*EGINISGNFYR.N	1.13		1.15	1.08654		1.15	2	1.11827	0.0448741	0.0401282	0.161268
925	Q9Y530	OARD1 O-acetyl-ADP-ribose deacetylase 1	OARD1	R.IGC*GLDR.L		1.33	1.09		1.14655	1.09	2	1.11828	0.0399881	0.0357587	0.161276
1551	Q9NS87	KIF15 Kinesin-like protein KIF15	KIF15	K.AQKEPC*LFANTEK.L	1.17	1.29		1.125	1.11207		2	1.11853	0.00914362	0.00817464	0.16161
1045	P22087	FBL rRNA 2-O-methyltransferase fibrillarin	FBL	R.HEGVFIC*R.G	1.11		1.17	1.06731		1.17	2	1.11865	0.0726144	0.0649123	0.161764
1075	P54105	CLNS1A Methylosome subunit pICln	CLNS1A	R.DRSDC*LGEHLYVMVNAK.F	1.09		1.19	1.04808		1.19	2	1.11904	0.100355	0.0896795	0.16226
844	Q13546	RIPK1 Receptor-interacting serine/threonine-protein kina	RIPK1	K.TVYKGPNC*IEHNEALLEEAK.M	1.24		1.05	1.19231		1.05	2	1.12115	0.100627	0.0897528	0.164984
1553	Q9UHX1	PUF60 Poly(U)-binding-splicing factor PUF60	PUF60	K.IKSC*TLAR.D	1.17	1.3		1.125	1.12069		2	1.12284	0.00304787	0.00271442	0.167159
1312	Q96BN8	OTULIN Ubiquitin thioesterase otulin	OTULIN	K.AAASGQPRPEMQC*PAEHEEDMYR.A	0.89		1.39	0.855769		1.39	2	1.12288	0.377758	0.336418	0.16721
1051	Q9HAV7	GRPEL1 GrpE protein homolog 1, mitochondrial	GRPEL1	K.ATQC*VPKEEIKDDNPHLK.N	1.12	1.29	1.18	1.07692	1.11207	1.18	3	1.123	0.0524002	0.0466611	0.167355
837	Q86WR0	CCDC25 Coiled-coil domain-containing protein 25	CCDC25	R.FPDLAAEKEC*R.D		1.39	1.05		1.19828	1.05	2	1.12414	0.104847	0.0932687	0.168819
1090	P07900	HSP90AA1 Heat shock protein HSP 90-alpha	HSP90AA1	R.VFIMDNC*EELIPEYLNFIR.G	0.89	1.53	1.2	0.855769	1.31897	1.2	3	1.12491	0.240554	0.213843	0.169812
988	Q7Z6Z7	HUWE1 E3 ubiquitin-protein ligase HUWE1	HUWE1	R.VLGPAAC*R.N		1.3	1.13		1.12069	1.13	2	1.12534	0.00658341	0.00585013	0.170367
1208	Q8WXD5	GEMIN6 Gem-associated protein 6	GEMIN6	K.LMHLFTSGDC*K.A	1		1.29	0.961538		1.29	2	1.12577	0.232257	0.20631	0.170911
257	P48735	IDH2 Isocitrate dehydrogenase [NADP], mitochondrial	IDH2	K.SSGGFVWAC*K.N	1.31	1.6	0.74	1.25962	1.37931	0.74	3	1.12631	0.339864	0.30175	0.171602
932	O95453	PARN Poly(A)-specific ribonuclease PARN	PARN	K.C*PVTIPEDQKK.F	1.21		1.09	1.16346		1.09	2	1.12673	0.0519452	0.0461025	0.172143
798	P34897	SHMT2 Serine hydroxymethyltransferase, mitochondrial	SHMT2	R.AALEALGSC*LNNK.Y		1.42	1.03		1.22414	1.03	2	1.12707	0.137276	0.121799	0.172576
1015	Q00534	CDK6 Cyclin-dependent kinase 6	CDK6	R.ADQQYEC*VAEIGEGAYGK.V	1.14	1.32	1.15	1.09615	1.13793	1.15	3	1.12803	0.028256	0.025049	0.173803
957	P21333	FLNA Filamin-A	FLNA	K.VGTEC*GNQK.V		1.33	1.11		1.14655	1.11	2	1.12828	0.025846	0.0229075	0.17412
1016	Q9BZX2	UCK2 Uridine-cytidine kinase 2	UCK2	R.QTNGC*LNGYTPSR.K	1.07	1.4	1.15	1.02885	1.2069	1.15	3	1.12858	0.0909372	0.0805766	0.17451
1041	P62753	RPS6 40S ribosomal protein S6	RPS6	K.LNISFPATGC*QK.L	1.06	1.39	1.17	1.01923	1.19828	1.17	3	1.12917	0.0962532	0.0852425	0.175261
1227	Q96RS6	NUDCD1 NudC domain-containing protein 1	NUDCD1	K.QGELIRDSAQC*AAIAER.L	1.06	1.23	1.31	1.01923	1.06034	1.31	3	1.12986	0.157356	0.13927	0.176142
927	P46782	RPS5 40S ribosomal protein S5	RPS5	R.VNQAIWLLC*TGAR.E	1.02	1.53	1.09	0.980769	1.31897	1.09	3	1.12991	0.172595	0.152751	0.17621
784	P62318	SNRPD3 Small nuclear ribonucleoprotein Sm D3	SNRPD3	K.VLHEAEGHIVTC*ETNTGEVYR.G	1.29		1.02	1.24038		1.02	2	1.13019	0.155835	0.137884	0.176568
783	Q99719	SEPT5 Septin-5	2020-09-05	R.AHC*IQQMTSK.L	1.29		1.02	1.24038		1.02	2	1.13019	0.155835	0.137884	0.176568
820	P46013	MKI67 Proliferation marker protein Ki-67	MKI67	R.SQHDILQMIC*SK.R	1.27		1.04	1.22115		1.04	2	1.13058	0.128095	0.113301	0.177059
926	P15498	VAV1 Proto-oncogene vav	VAV1	R.YDFC*AR.D		1.36	1.09		1.17241	1.09	2	1.13121	0.0582754	0.0515161	0.177863
1279	Q13888	GTF2H2 General transcription factor IIH subunit 2	GTF2H2	R.AKYC*ELPVECK.I		1.06	1.35		0.913793	1.35	2	1.1319	0.308445	0.272503	0.178742
563	P61077	UBE2D3 Ubiquitin-conjugating enzyme E2 D3	UBE2D3	K.VLLSICSLLC*DPNPDDPLVPEIAR.I	1.42		0.9	1.36538		0.9	2	1.13269	0.329077	0.290526	0.179756
1033	O60610	DIAPH1 Protein diaphanous homolog 1	DIAPH1	K.LIEEC*ISQIVLHK.N	1.15		1.16	1.10577		1.16	2	1.13288	0.0383469	0.0338489	0.180001
1014	A0AVT1	UBA6 Ubiquitin-like modifier-activating enzyme 6	UBA6	R.KPNVGC*QQDSEELLK.L	1.2	1.27	1.15	1.15385	1.09483	1.15	3	1.13289	0.0330201	0.0291468	0.180009
999	Q16630	CPSF6 Cleavage and polyadenylation specificity factor su	CPSF6	R.ELHGQNPVVTPC*NK.Q		1.31	1.14		1.12931	1.14	2	1.13466	0.00755873	0.0066617	0.182254
1085	P61247	RPS3A 40S ribosomal protein S3a	RPS3A	K.MC*SMVK.K	1.11	1.32	1.2	1.06731	1.13793	1.2	3	1.13508	0.0663921	0.0584911	0.182793
913	P60174	TPI1 Triosephosphate isomerase	TPI1	K.IAVAAQNC*YK.V	0.93	1.66	1.08	0.894231	1.43103	1.08	3	1.13509	0.272609	0.240165	0.182805
1132	Q7RTV0	PHF5A PHD finger-like domain-containing protein 5A	PHF5A	K.CVICDSYVRPC*TLVR.I	1.09		1.23	1.04808		1.23	2	1.13904	0.128639	0.112937	0.187816
1162	Q52LJ0	FAM98B Protein FAM98B	FAM98B	K.TAC*AINK.V	1.11	1.27	1.26	1.06731	1.09483	1.26	3	1.14071	0.104219	0.0913631	0.189934
1000	P55769	SNU13 NHP2-like protein 1	SNU13	K.KLLDLVQQSC*NYK.Q	1.19	1.32	1.14	1.14423	1.13793	1.14	3	1.14072	0.00321109	0.00281497	0.189945
1242	P50990	CCT8 T-complex protein 1 subunit theta	CCT8	K.AHEILPNLVCC*SAK.N	1		1.32	0.961538		1.32	2	1.14077	0.253471	0.222193	0.190007
959	Q9BSC4	NOL10 Nucleolar protein 10	NOL10	K.IYSLSC*GK.S	1.17	1.38	1.11	1.125	1.18966	1.11	3	1.14155	0.0423286	0.0370798	0.190996
1005	P31350	RRM2 Ribonucleoside-diphosphate reductase subunit M2	RRM2	K.LIGMNC*TLMK.Q	1.19		1.14	1.14423		1.14	2	1.14212	0.00299161	0.00261935	0.191708
1046	Q9H0C8	ILKAP Integrin-linked kinase-associated serine/threonine	ILKAP	R.C*LLDTFKHTDEEFLK.Q	1.16		1.17	1.11538		1.17	2	1.14269	0.0386189	0.0337964	0.192437
1177	Q99829	CPNE1 Copine-1	CPNE1	R.NC*SSPEFSK.T	1.08	1.3	1.27	1.03846	1.12069	1.27	3	1.14305	0.117378	0.102688	0.192889
867	P53597	SUCLG1 Succinate--CoA ligase [ADP/GDP-forming] subunit al	SUCLG1	K.IIC*QGFTGK.Q		1.43	1.06		1.23276	1.06	2	1.14638	0.122159	0.106561	0.197084
1113	P62913	RPL11 60S ribosomal protein L11	RPL11	R.TGC*IGAK.H	1.09	1.36	1.22	1.04808	1.17241	1.22	3	1.14683	0.0887709	0.0774055	0.197652
1199	Q8WUM4	PDCD6IP Programmed cell death 6-interacting protein	PDCD6IP	K.AVQADGQVKEC*YQSHR.D	1.1	1.27	1.29	1.05769	1.09483	1.29	3	1.14751	0.124792	0.108751	0.198502
944	P41250	GARS Glycine--tRNA ligase	GARS	R.SC*YDLSCHAR.A	1.21	1.37	1.1	1.16346	1.18103	1.1	3	1.14817	0.0426278	0.0371269	0.19933
1028	Q7Z5L9	IRF2BP2 Interferon regulatory factor 2-binding protein 2	IRF2BP2	R.AHGC*FPEGR.S	1.13	1.39	1.16	1.08654	1.19828	1.16	3	1.14827	0.0567845	0.0494522	0.199464
1126	Q8TDX7	NEK7 Serine/threonine-protein kinase Nek7	NEK7	R.AAC*LLDGVPVALKK.V	1.12		1.22	1.07692		1.22	2	1.14846	0.101171	0.0880923	0.199703
960	Q14152	EIF3A Eukaryotic translation initiation factor 3 subunit	EIF3A	K.FC*LQYTR.K	1.05	1.54	1.11	1.00962	1.32759	1.11	3	1.14907	0.162546	0.141459	0.200463
1114	P15880	RPS2 40S ribosomal protein S2	RPS2	R.GC*TATLGNFAK.A	1.1	1.36	1.22	1.05769	1.17241	1.22	3	1.15004	0.0834359	0.0725507	0.201678
1135	Q01518	CAP1 Adenylyl cyclase-associated protein 1	CAP1	K.NSLDC*EIVSAK.S		1.23	1.24		1.06034	1.24	2	1.15017	0.127035	0.110449	0.20185
1164	P61978	HNRNPK Heterogeneous nuclear ribonucleoprotein K	HNRNPK	K.IIPTLEEGLQLPSPTATSQLPLESDAVEC*LNYQHYK.G	1.05	1.37	1.26	1.00962	1.18103	1.26	3	1.15022	0.128006	0.111288	0.201906
990	P25205	MCM3 DNA replication licensing factor MCM3	MCM3	R.YVLC*TAPR.A		1.36	1.13		1.17241	1.13	2	1.15121	0.0299911	0.0260519	0.203147
1116	Q14684	RRP1B Ribosomal RNA processing protein 1 homolog B	RRP1B	R.GRDDC*GTFEDTGPLLQFDYK.A	1.06	1.41	1.22	1.01923	1.21552	1.22	3	1.15158	0.114642	0.0995517	0.203618
1083	Q9NPG3	UBN1 Ubinuclein-1	UBN1	K.ASPTQC*HR.S		1.28	1.2		1.10345	1.2	2	1.15172	0.0682724	0.0592784	0.203795
908	Q7RTV0	PHF5A PHD finger-like domain-containing protein 5A	PHF5A	R.ICDEC*NYGSYQGR.C	1.28	1.33	1.08	1.23077	1.14655	1.08	3	1.15244	0.0755569	0.0655625	0.204692
1031	P62249	RPS16 40S ribosomal protein S16	RPS16	K.KTATAVAHC*K.R	1	1.55	1.16	0.961538	1.33621	1.16	3	1.15258	0.187444	0.16263	0.204869
1030	O43390	HNRNPR Heterogeneous nuclear ribonucleoprotein R	HNRNPR	K.SAFLC*GVMK.T	1.09	1.45	1.16	1.04808	1.25	1.16	3	1.15269	0.10116	0.0877595	0.205007
1292	O15355	PPM1G Protein phosphatase 1G	PPM1G	R.GTEAGQVGEPGIPTGEAGPSC*SSASDKLPR.V	1	1.32	1.36	0.961538	1.13793	1.36	3	1.15316	0.199667	0.173148	0.205588
1228	P60174	TPI1 Triosephosphate isomerase	TPI1	R.IIYGGSVTGATC*K.E	1.03	1.35	1.31	0.990385	1.16379	1.31	3	1.15473	0.16	0.138561	0.20755
1059	P25098	GRK2 Beta-adrenergic receptor kinase 1	GRK2	K.ELLAC*SHPFSK.S	1.18		1.18	1.13462		1.18	2	1.15731	0.0320918	0.0277297	0.210772
1183	P34932	HSPA4 Heat shock 70 kDa protein 4	HSPA4	R.AGGIETIANEYSDRC*TPACISFGPK.N	1.15	1.26	1.28	1.10577	1.08621	1.28	3	1.15733	0.106689	0.0921855	0.210795
1040	P42167	TMPO Lamina-associated polypeptide 2, isoforms beta/gam	TMPO	K.EMFPYEASTPTGISASC*R.R		1.33	1.17		1.14655	1.17	2	1.15828	0.0165804	0.0143148	0.211979
1112	P24941	CDK2 Cyclin-dependent kinase 2	CDK2	R.APEILLGC*K.Y	1.18	1.3	1.22	1.13462	1.12069	1.22	3	1.15844	0.0537696	0.0464157	0.212177
1120	P57721	PCBP3 Poly(rC)-binding protein 3	PCBP3	K.QIC*VVMLESPPK.G	1.02	1.48	1.22	0.980769	1.27586	1.22	3	1.15888	0.156754	0.135264	0.212728
1067	Q13185	CBX3 Chromobox protein homolog 3	CBX3	R.LTWHSC*PEDEAQ.-		1.31	1.19		1.12931	1.19	2	1.15966	0.0429141	0.0370059	0.213696
1092	P18858	LIG1 DNA ligase 1	LIG1	R.VREDKQPEQATTSAQVAC*LYR.K	0.9	1.64	1.2	0.865385	1.41379	1.2	3	1.15973	0.276414	0.238344	0.213784
1243	P18621	RPL17 60S ribosomal protein L17	RPL17	R.INPYMSSPC*HIEMILTEK.E	1.04		1.32	1		1.32	2	1.16	0.226274	0.195064	0.214125
1259	P14635	CCNB1 G2/mitotic-specific cyclin-B1	CCNB1	R.FMQNNC*VPK.K	1.03		1.33	0.990385		1.33	2	1.16019	0.240144	0.206987	0.214364
1403	O43290	SART1 U4/U6.U5 tri-snRNP-associated protein 1	SART1	K.SLPSAVYC*IEDK.M	0.9	1.18	1.6	0.865385	1.01724	1.6	3	1.16088	0.387799	0.334057	0.215213
1056	P23396	RPS3 40S ribosomal protein S3	RPS3	K.GC*EVVVSGK.L	0.97	1.59	1.18	0.932692	1.37069	1.18	3	1.16113	0.219608	0.189133	0.215526
911	P17987	TCP1 T-complex protein 1 subunit alpha	TCP1	R.SLHDALC*VVK.R	1.14	1.52	1.08	1.09615	1.31034	1.08	3	1.16217	0.12858	0.110639	0.216816
1003	P53384	NUBP1 Cytosolic Fe-S cluster assembly factor NUBP1	NUBP1	R.GASC*QGCPNQR.L	1.06	1.54	1.14	1.01923	1.32759	1.14	3	1.16227	0.15538	0.133686	0.216948
1235	Q06203	PPAT Amidophosphoribosyltransferase	PPAT	K.KHDIMIQENGNGLEC*FEK.S	1.06		1.31	1.01923		1.31	2	1.16462	0.205605	0.176543	0.219854
1412	O15020	SPTBN2 Spectrin beta chain, non-erythrocytic 2	SPTBN2	R.IHC*LENVDK.A	0.9	1.15	1.64	0.865385	0.991379	1.64	3	1.16559	0.415655	0.356605	0.221058
703	O94776	MTA2 Metastasis-associated protein MTA2	MTA2	R.ALDC*SSSIR.Q		1.57	0.98		1.35345	0.98	2	1.16672	0.264068	0.226333	0.222463
1350	P62241	RPS8 40S ribosomal protein S8	RPS8	R.LDVGNFSWGSEC*C*TR.K	0.92		1.45	0.884615		1.45	2	1.16731	0.399787	0.342487	0.223185
1099	P62280	RPS11 40S ribosomal protein S11	RPS11	R.DVQIGDIVTVGEC*R.P	1.06	1.48	1.21	1.01923	1.27586	1.21	3	1.16836	0.133286	0.114079	0.22449
1161	Q14839	CHD4 Chromodomain-helicase-DNA-binding protein 4	CHD4	R.HLC*EPGADGAETFADGVPR.E		1.25	1.26		1.07759	1.26	2	1.16879	0.128986	0.110358	0.22502
1249	O00571	DDX3X ATP-dependent RNA helicase DDX3X	DDX3X	R.WC*DKSDEDDWSKPLPPSER.L	1.31	1.07	1.33	1.25962	0.922414	1.33	3	1.17068	0.217863	0.1861	0.227342
1054	Q6NXE6	ARMC6 Armadillo repeat-containing protein 6	ARMC6	K.AFLDNPGILSELC*GTLSR.L	1.11	1.47	1.18	1.06731	1.26724	1.18	3	1.17152	0.100236	0.0855613	0.228377
1167	Q68DK7	MSL1 Male-specific lethal 1 homolog	MSL1	R.KSPLGGGGGSGASSQAAC*LK.Q	1.13		1.26	1.08654		1.26	2	1.17327	0.122656	0.104542	0.230534
1287	O15226	NKRF NF-kappa-B-repressing factor	NKRF	K.SSQC*HTGSSPR.G	1.04		1.35	1		1.35	2	1.175	0.247487	0.210628	0.232661
1129	P60866	RPS20 40S ribosomal protein S20	RPS20	K.TPC*GEGSK.T	1.07	1.47	1.23	1.02885	1.26724	1.23	3	1.17536	0.128246	0.109112	0.233106
1176	P78417	GSTO1 Glutathione S-transferase omega-1	GSTO1	K.KLLPDDPYEKAC*QK.M	1.19	1.29	1.27	1.14423	1.11207	1.27	3	1.17543	0.0834611	0.0710045	0.233193
1032	P35611	ADD1 Alpha-adducin	ADD1	K.TAGPQSQVLC*GVVMDR.S	0.92	1.72	1.16	0.884615	1.48276	1.16	3	1.17579	0.299384	0.254624	0.233632
1323	O43865	AHCYL1 S-adenosylhomocysteine hydrolase-like protein 1	AHCYL1	K.FDNLYC*CR.E	1.03	1.31	1.41	0.990385	1.12931	1.41	3	1.17656	0.213762	0.181683	0.234581
1017	Q99436	PSMB7 Proteasome subunit beta type-7	PSMB7	R.ATEGMVVADKNC*SK.I		1.4	1.15		1.2069	1.15	2	1.17845	0.0402319	0.0341398	0.236888
1195	P49591	SARS Serine--tRNA ligase, cytoplasmic	SARS	R.TIC*AILENYQTEK.G	1.12		1.28	1.07692		1.28	2	1.17846	0.143597	0.121851	0.236905
1209	P62910	RPL32 60S ribosomal protein L32	RPL32	K.ELEVLLMC*NK.S	1.11		1.29	1.06731		1.29	2	1.17865	0.157467	0.133599	0.23714
869	O76039	CDKL5 Cyclin-dependent kinase-like 5	CDKL5	K.LC*DFGFAR.N	1.35		1.06	1.29808		1.06	2	1.17904	0.168346	0.142782	0.237611
1260	P45880	VDAC2 Voltage-dependent anion-selective channel protein	VDAC2	K.YKWC*EYGLTFTEK.W	1.07		1.33	1.02885		1.33	2	1.17942	0.212948	0.180553	0.238081
1071	P62306	SNRPF Small nuclear ribonucleoprotein F	SNRPF	R.C*NNVLYIR.G	1.17	1.42	1.19	1.125	1.22414	1.19	3	1.17971	0.0503632	0.0426911	0.238435
1038	P08238	HSP90AB1 Heat shock protein HSP 90-beta	HSP90AB1	R.VFIMDSC*DELIPEYLNFIR.G	1.29	1.31	1.17	1.24038	1.12931	1.17	3	1.1799	0.0561948	0.0476268	0.238663
1144	Q9Y3U8	RPL36 60S ribosomal protein L36	RPL36	R.DMIREVC*GFAPYER.R		1.29	1.25		1.11207	1.25	2	1.18103	0.097532	0.0825818	0.240051
626	P22102	GART Trifunctional purine biosynthetic protein adenosin	GART	R.LLEGDGGPNTGGMGAYC*PAPQVSNDLLLK.I	1.56	1.28	0.94	1.5	1.10345	0.94	3	1.18115	0.287972	0.243807	0.240191
1201	P78347	GTF2I General transcription factor II-I	GTF2I	R.SILSPGGSC*GPIK.V	1.09	1.4	1.29	1.04808	1.2069	1.29	3	1.18166	0.12292	0.104024	0.240812
1168	P62258	YWHAE 14-3-3 protein epsilon	YWHAE	K.LIC*CDILDVLDKHLIPAANTGESK.V	1.15		1.26	1.10577		1.26	2	1.18288	0.109058	0.0921963	0.242309
815	Q9Y3A3	MOB4 MOB-like protein phocein	MOB4	R.HTLDGAAC*LLNSNK.Y	1.22	1.55	1.04	1.17308	1.33621	1.04	3	1.18309	0.148357	0.125398	0.242565
670	P33992	MCM5 DNA replication licensing factor MCM5	MCM5	R.C*SVLAAANSVFGR.W	1.47		0.96	1.41346		0.96	2	1.18673	0.320646	0.270192	0.246993
1029	Q04759	PRKCQ Protein kinase C theta type	PRKCQ	R.IGLSNFDCGSC*QSCQGEAVNPYCAVLVK.E		1.41	1.16		1.21552	1.16	2	1.18776	0.0392566	0.033051	0.248242
933	Q96EB1	ELP4 Elongator complex protein 4	ELP4	K.ISSTLKVEPC*SLTPGYTK.L	1.34		1.09	1.28846		1.09	2	1.18923	0.140333	0.118004	0.250029
1302	P52272	HNRNPM Heterogeneous nuclear ribonucleoprotein M	HNRNPM	K.GC*GVVKFESPEVAER.A	1.04	1.39	1.37	1	1.19828	1.37	3	1.18943	0.185159	0.155671	0.250265
1315	P47756	CAPZB F-actin-capping protein subunit beta	CAPZB	K.DETVSDC*SPHIANIGR.L	1.1	1.29	1.4	1.05769	1.11207	1.4	3	1.18992	0.183955	0.154594	0.250865
1117	Q9Y696	CLIC4 Chloride intracellular channel protein 4	CLIC4	K.AGSDGESIGNC*PFSQR.L	1.18	1.41	1.22	1.13462	1.21552	1.22	3	1.19004	0.0480551	0.0403809	0.251015
948	Q00610	CLTC Clathrin heavy chain 1	CLTC	R.IHEGC*EEPATHNALAK.I	1.09	1.65	1.1	1.04808	1.42241	1.1	3	1.19016	0.202803	0.170399	0.25116
1082	P13984	GTF2F2 General transcription factor IIF subunit 2	GTF2F2	R.AEC*RPAASENYMR.L	1.33	1.27	1.2	1.27885	1.09483	1.2	3	1.19122	0.0923226	0.0775023	0.252445
1178	Q00013	MPP1 55 kDa erythrocyte membrane protein	MPP1	R.VASMAQSAPSEAPSC*SPFGK.K	1.08	1.47	1.27	1.03846	1.26724	1.27	3	1.1919	0.13289	0.111494	0.253264
1348	O60343	TBC1D4 TBC1 domain family member 4	TBC1D4	R.SQKPEAGGC*GAPAAR.E	1.18	1.15	1.45	1.13462	0.991379	1.45	3	1.192	0.234633	0.19684	0.253382
1574	O00410	IPO5 Importin-5	IPO5	R.MAC*GLGGK.L	0.94	1.72		0.903846	1.48276		2	1.1933	0.409353	0.343042	0.25496
1088	Q9Y3A2	UTP11 Probable U3 small nucleolar RNA-associated protein	UTP11	R.QKQYNC*LTQR.I		1.38	1.2		1.18966	1.2	2	1.19483	0.0073149	0.00612214	0.256802
354	Q02790	FKBP4 Peptidyl-prolyl cis-trans isomerase FKBP4	FKBP4	K.TQLAVC*QQR.I	1.49	1.57	0.8	1.43269	1.35345	0.8	3	1.19538	0.344694	0.288355	0.25747
1324	P60981	DSTN Destrin	DSTN	K.C*STPEEIKKR.K	0.96	1.46	1.41	0.923077	1.25862	1.41	3	1.19723	0.249199	0.208145	0.259703
838	P55036	PSMD4 26S proteasome non-ATPase regulatory subunit 4	PSMD4	R.SNPENNVGLITLANDC*EVLTTLTPDTGR.I		1.56	1.05		1.34483	1.05	2	1.19741	0.208475	0.174104	0.259922
1146	Q16186	ADRM1 Proteasomal ubiquitin receptor ADRM1	ADRM1	R.VPQC*PSGR.V	1.12	1.47	1.25	1.07692	1.26724	1.25	3	1.19805	0.105257	0.0878564	0.260694
1039	P57721	PCBP3 Poly(rC)-binding protein 3	PCBP3	R.INISEGNC*PER.I	1.33	1.33	1.17	1.27885	1.14655	1.17	3	1.19847	0.0705917	0.0589017	0.261189
1121	Q14181	POLA2 DNA polymerase alpha subunit B	POLA2	K.VLGC*PEALTGSYK.S	1.09	1.54	1.22	1.04808	1.32759	1.22	3	1.19855	0.140983	0.117628	0.261295
1215	Q15054	POLD3 DNA polymerase delta subunit 3	POLD3	K.FSAIQC*AAAVPR.A	1.5	0.99	1.3	1.44231	0.853448	1.3	3	1.19859	0.30725	0.256344	0.261333
1118	P37802	TAGLN2 Transgelin-2	TAGLN2	K.NMAC*VQR.T	1.19	1.43	1.22	1.14423	1.23276	1.22	3	1.199	0.0478556	0.039913	0.261827
1571	P15880	RPS2 40S ribosomal protein S2	RPS2	K.C*SKEVATAIR.G	0.97	1.7		0.932692	1.46552		2	1.1991	0.376764	0.314205	0.261958
1043	P25205	MCM3 DNA replication licensing factor MCM3	MCM3	R.SVHYC*PATK.K	1.09	1.6	1.17	1.04808	1.37931	1.17	3	1.19913	0.167527	0.139707	0.261987
904	P48047	ATP5O ATP synthase subunit O, mitochondrial	ATP5O	R.GEVPC*TVTSASPLEEATLSELK.T	1.48	1.27	1.08	1.42308	1.09483	1.08	3	1.1993	0.193937	0.161708	0.262194
912	O75179	ANKRD17 Ankyrin repeat domain-containing protein 17	ANKRD17	R.VC*DLLLK.K		1.53	1.08		1.31897	1.08	2	1.19948	0.168974	0.140873	0.262412
1318	P53350	PLK1 Serine/threonine-protein kinase PLK1	PLK1	R.ETGEVVDC*HLSDMLQQLHSVNASKPSER.G	1.04		1.4	1		1.4	2	1.2	0.282843	0.235702	0.263034
1570	Q9H0A8	COMMD4 COMM domain-containing protein 4	COMMD4	K.EHAASLC*R.C	1.02	1.65		0.980769	1.42241		2	1.20159	0.31229	0.259897	0.264947
1188	Q969T9	WBP2 WW domain-binding protein 2	WBP2	K.DC*EIKQPVFGANYIK.G	1.1	1.47	1.28	1.05769	1.26724	1.28	3	1.20164	0.124829	0.103882	0.26501
1375	Q7L2H7	EIF3M Eukaryotic translation initiation factor 3 subunit	EIF3M	R.LLYEALVDC*KK.S	0.93		1.51	0.894231		1.51	2	1.20212	0.435415	0.362207	0.265575
1070	Q04760	GLO1 Lactoylglutathione lyase	GLO1	K.C*DFPIMK.F		1.41	1.19		1.21552	1.19	2	1.20276	0.0180434	0.0150017	0.266347
1200	P28062	PSMB8 Proteasome subunit beta type-8	PSMB8	K.VIEINPYLLGTMSGC*AADCQYWER.L	1.21	1.34	1.29	1.16346	1.15517	1.29	3	1.20288	0.0755636	0.062819	0.26649
1163	P04181	OAT Ornithine aminotransferase, mitochondrial	OAT	K.VLPMNTGVEAGETAC*K.L		1.33	1.26		1.14655	1.26	2	1.20328	0.08022	0.066668	0.266967
1226	P23921	RRM1 Ribonucleoside-diphosphate reductase large subunit	RRM1	R.NTAAMVCSLENRDECLMC*GS.-	1.37	1.14	1.31	1.31731	0.982759	1.31	3	1.20336	0.191077	0.158787	0.267063
1187	P36969	GPX4 Phospholipid hydroperoxide glutathione peroxidase,	GPX4	R.YAEC*GLR.I	1.18	1.39	1.28	1.13462	1.19828	1.28	3	1.2043	0.0728791	0.0605159	0.268191
1086	P43490	NAMPT Nicotinamide phosphoribosyltransferase	NAMPT	R.DLLNC*SFK.C	1.3	1.35	1.2	1.25	1.16379	1.2	3	1.2046	0.043287	0.0359348	0.268551
946	Q5VTL8	PRPF38B Pre-mRNA-splicing factor 38B	PRPF38B	R.KTAGQTGMC*GGVR.G		1.52	1.1		1.31034	1.1	2	1.20517	0.148736	0.123415	0.26924
973	Q96I24	FUBP3 Far upstream element-binding protein 3	FUBP3	R.SSGC*FPNMAAK.V	1.52	1.2	1.12	1.46154	1.03448	1.12	3	1.20534	0.225957	0.187463	0.269441
592	P27635	RPL10 60S ribosomal protein L10	RPL10	K.AKVDEFPLC*GHMVSDEYEQLSSEALEAAR.I	1.02	1.99	0.92	0.980769	1.71552	0.92	3	1.20543	0.442793	0.367333	0.269546
1229	Q9Y3B4	SF3B6 Splicing factor 3B subunit 6	SF3B6	K.NACDHLSGFNVC*NR.Y	1.1	1.45	1.31	1.05769	1.25	1.31	3	1.2059	0.131809	0.109304	0.270107
1216	P00813	ADA Adenosine deaminase	ADA	K.FDYYMPAIAGC*R.E	1.15	1.41	1.3	1.10577	1.21552	1.3	3	1.2071	0.0973889	0.0806803	0.27154
1002	Q9BXJ9	NAA15 N-alpha-acetyltransferase 15, NatA auxiliary subun	NAA15	R.LFNTAVC*ESK.D	1.32	1.41	1.14	1.26923	1.21552	1.14	3	1.20825	0.0649212	0.0537316	0.272918
1356	Q15370	ELOB Elongin-B	ELOB	R.ADDTFEALC*IEPFSSPPELPDVMKPQDSGSSANEQAVQ.-	1.07	1.32	1.46	1.02885	1.13793	1.46	3	1.20893	0.224173	0.185432	0.273726
1115	Q96EY8	MMAB Cob(I)yrinic acid a,c-diamide adenosyltransferase,	MMAB	K.IQCTLQDVGSALATPC*SSAR.E		1.39	1.22		1.19828	1.22	2	1.20914	0.0153613	0.0127043	0.273979
1568	Q7Z460	CLASP1 CLIP-associating protein 1	CLASP1	R.LIPVITSNC*TSK.S	1.09	1.59		1.04808	1.37069		2	1.20938	0.228122	0.188626	0.274272
885	Q8IZ69	TRMT2A tRNA (uracil-5-)-methyltransferase homolog A	TRMT2A	R.KQLEC*EQVLQK.L	1.04	1.81	1.07	1	1.56034	1.07	3	1.21011	0.305321	0.252307	0.275144
1053	Q96QR8	PURB Transcriptional activator protein Pur-beta	PURB	R.GGGGGPC*GFQPASR.G		1.44	1.18		1.24138	1.18	2	1.21069	0.0434017	0.0358488	0.275829
1175	P11908	PRPS2 Ribose-phosphate pyrophosphokinase 2	PRPS2	R.VTAVIPC*FPYAR.Q	1.32	1.27	1.27	1.26923	1.09483	1.27	3	1.21135	0.100915	0.0833073	0.276619
1395	P45880	VDAC2 Voltage-dependent anion-selective channel protein	VDAC2	K.WNTDNTLGTEIAIEDQIC*QGLK.L	0.9	1.41	1.56	0.865385	1.21552	1.56	3	1.21363	0.347312	0.286175	0.279333
1298	O15067	PFAS Phosphoribosylformylglycinamidine synthase	PFAS	R.GLAPLHWADDDGNPTEQYPLNPNGSPGGVAGICSC*DGR.H	1.11		1.36	1.06731		1.36	2	1.21365	0.206965	0.17053	0.279357
1569	P35270	SPR Sepiapterin reductase	SPR	K.GKLVDC*K.V	1.09	1.6		1.04808	1.37931		2	1.21369	0.234217	0.192979	0.279404
1136	Q5RKV6	EXOSC6 Exosome complex component MTR3	EXOSC6	R.RAPPGGC*EER.E		1.38	1.24		1.18966	1.24	2	1.21483	0.0355992	0.0293039	0.280752
1351	P54136	RARS Arginine--tRNA ligase, cytoplasmic	RARS	K.NC*GC*LGASPNLEQLQEENLK.L	1.02		1.45	0.980769		1.45	2	1.21538	0.331796	0.272997	0.281413
1145	Q8IY81	FTSJ3 pre-rRNA processing protein FTSJ3	FTSJ3	K.QQLPQTPPSC*LK.T		1.37	1.25		1.18103	1.25	2	1.21552	0.048766	0.0401195	0.28157
1261	P53396	ACLY ATP-citrate synthase	ACLY	R.KPASFMTSIC*DER.G	1.15		1.33	1.10577		1.33	2	1.21788	0.158555	0.130189	0.284377
965	Q9BWD1	ACAT2 Acetyl-CoA acetyltransferase, cytosolic	ACAT2	R.ATVAPEDVSEVIFGHVLAAGC*GQNPVR.Q	1.38		1.11	1.32692		1.11	2	1.21846	0.153388	0.125886	0.285061
1319	P40926	MDH2 Malate dehydrogenase, mitochondrial	MDH2	K.TIIPLISQC*TPK.V	1.08		1.4	1.03846		1.4	2	1.21923	0.255646	0.209678	0.285971
671	Q1KMD3	HNRNPUL2 Heterogeneous nuclear ribonucleoprotein U-like pro	HNRNPUL2	K.GKVC*FEAK.V	1.54		0.96	1.48077		0.96	2	1.22038	0.368239	0.30174	0.287336
1381	P61758	VBP1 Prefoldin subunit 3	VBP1	R.FLLADNLYC*K.A	0.96		1.52	0.923077		1.52	2	1.22154	0.422088	0.345538	0.288699
1087	Q9Y277	VDAC3 Voltage-dependent anion-selective channel protein	VDAC3	K.YMLDC*R.T	1.33	1.38	1.2	1.27885	1.18966	1.2	3	1.22283	0.0487831	0.0398935	0.290228
1251	P28838	LAP3 Cytosol aminopeptidase	LAP3	R.SAGAC*TAAAFLK.E	1.15	1.43	1.33	1.10577	1.23276	1.33	3	1.22284	0.112444	0.0919528	0.290239
1271	P61247	RPS3A 40S ribosomal protein S3a	RPS3A	R.LFC*VGFTK.K	1.31	1.24	1.34	1.25962	1.06897	1.34	3	1.22286	0.139205	0.113836	0.29026
1060	O14818	PSMA7 Proteasome subunit alpha type-7	PSMA7	R.ARVEC*QSHR.L	1.32		1.18	1.26923		1.18	2	1.22462	0.0630957	0.0515229	0.292329
1338	Q9Y490	TLN1 Talin-1	TLN1	K.HTSALC*NSCR.L	1.37	1.08	1.43	1.31731	0.931034	1.43	3	1.22611	0.261685	0.213426	0.294093
942	O00233	PSMD9 26S proteasome non-ATPase regulatory subunit 9	PSMD9	K.GIGMNEPLVDC*EGYPR.S	1.51	1.31	1.1	1.45192	1.12931	1.1	3	1.22708	0.195272	0.159136	0.295227
1250	O75348	ATP6V1G1 V-type proton ATPase subunit G 1	ATP6V1G1	R.GSC*STEVEKETQEK.M	1.18	1.42	1.33	1.13462	1.22414	1.33	3	1.22958	0.0978061	0.079544	0.298171
1196	P17858	PFKL ATP-dependent 6-phosphofructokinase, liver type	PFKL	R.TYSHLNIAGLVGSIDNDFC*GTDMTIGTDSALHR.I	1.23		1.28	1.18269		1.28	2	1.23135	0.0688069	0.0558794	0.300236
1206	Q6P1L5	FAM117B Protein FAM117B	FAM117B	R.DSHGQAAPC*MR.D	1.02	1.66	1.29	0.980769	1.43103	1.29	3	1.23393	0.230309	0.186646	0.303266
1061	P57772	EEFSEC Selenocysteine-specific elongation factor	EEFSEC	R.LDADIHTNTC*R.L	1.34		1.18	1.28846		1.18	2	1.23423	0.0766939	0.062139	0.303612
1306	P62857	RPS28 40S ribosomal protein S28	RPS28	R.TGSQGQC*TQVR.V	0.96	1.63	1.38	0.923077	1.40517	1.38	3	1.23608	0.271363	0.219535	0.305776
1102	Q16643	DBN1 Drebrin	DBN1	K.C*ACASHVAK.V	1.22	1.54	1.21	1.17308	1.32759	1.21	3	1.23689	0.0806876	0.0652344	0.306715
1262	Q9Y266	NUDC Nuclear migration protein nudC	NUDC	R.WTQTLSELDLAVPFC*VNFR.L	1.19		1.33	1.14423		1.33	2	1.23712	0.131359	0.106181	0.30698
1238	Q9NP61	ARFGAP3 ADP-ribosylation factor GTPase-activating protein	ARFGAP3	K.LANTC*FNEIEK.Q		1.34	1.32		1.15517	1.32	2	1.23759	0.116551	0.0941758	0.307529
1119	Q14692	BMS1 Ribosome biogenesis protein BMS1 homolog	BMS1	R.VNQPDREC*K.H		1.46	1.22		1.25862	1.22	2	1.23931	0.027309	0.0220356	0.309538
840	P52306	RAP1GDS1 Rap1 GTPase-GDP dissociation stimulator 1	RAP1GDS1	R.ALGNIC*YDSHEGR.S		1.66	1.05		1.43103	1.05	2	1.24052	0.269432	0.217193	0.310942
1217	Q00534	CDK6 Cyclin-dependent kinase 6	CDK6	R.C*KENLDSHLPPSQNTSELNTA.-	1.21	1.47	1.3	1.16346	1.26724	1.3	3	1.24357	0.0712813	0.05732	0.314485
1137	P56381	ATP5E ATP synthase subunit epsilon, mitochondrial	ATP5E	R.YSQIC*AK.A		1.45	1.24		1.25	1.24	2	1.245	0.00707107	0.00567957	0.316146
1202	P39023	RPL3 60S ribosomal protein L3	RPL3	K.TVFAEHISDEC*K.R	1.21	1.49	1.29	1.16346	1.28448	1.29	3	1.24598	0.0715175	0.0573986	0.317283
1236	O95801	TTC4 Tetratricopeptide repeat protein 4	TTC4	R.LSEAAC*EDEDSASEGLGELFLDGLSTENPHGAR.L	1.23		1.31	1.18269		1.31	2	1.24635	0.0900201	0.0722272	0.317705
1263	P31153	MAT2A S-adenosylmethionine synthase isoform type-2	MAT2A	K.GFDYKTC*NVLVALEQQSPDIAQGVHLDR.N	1.21		1.33	1.16346		1.33	2	1.24673	0.11776	0.0944554	0.31815
1299	O60763	USO1 General vesicular transport factor p115	USO1	K.C*QNEQLQTAVTQQVSQIQQHK.D	1.18		1.36	1.13462		1.36	2	1.24731	0.159371	0.127772	0.318817
947	Q92841	DDX17 Probable ATP-dependent RNA helicase DDX17	DDX17	R.TTSSANNPNLMYQDEC*DRR.L		1.62	1.1		1.39655	1.1	2	1.24828	0.209694	0.167987	0.319937
1047	O75153	CLUH Clustered mitochondria protein homolog	CLUH	K.C*LTQQAVALQR.T	1.38		1.17	1.32692		1.17	2	1.24846	0.110961	0.0888785	0.320151
1335	P63279	UBE2I SUMO-conjugating enzyme UBC9	UBE2I	K.QILLGIQELLNEPNIQDPAQAEAYTIYC*QNR.V	1.12		1.42	1.07692		1.42	2	1.24846	0.242592	0.194313	0.320151
1205	P50914	RPL14 60S ribosomal protein L14	RPL14	K.C*MQLTDFILK.F	1.12	1.6	1.29	1.07692	1.37931	1.29	3	1.24874	0.155358	0.124411	0.320478
1331	Q7Z4W1	DCXR L-xylulose reductase	DCXR	R.GVPGAIVNVSSQC*SQR.A	1.13	1.44	1.42	1.08654	1.24138	1.42	3	1.24931	0.166872	0.133572	0.321127
1055	P12270	TPR Nucleoprotein TPR	TPR	R.RDC*QEQAK.I	1.29	1.54	1.18	1.24038	1.32759	1.18	3	1.24932	0.0741981	0.0593906	0.321147
691	P46060	RANGAP1 Ran GTPase-activating protein 1	RANGAP1	K.LDLNGNTLGEEGC*EQLQEVLEGFNMAK.V	1.59		0.97	1.52885		0.97	2	1.24942	0.395164	0.316277	0.321262
1169	P42575	CASP2 Caspase-2	CASP2	R.SDMICGYAC*LK.G	1.29		1.26	1.24038		1.26	2	1.25019	0.0138702	0.0110944	0.32215
1210	O00264	PGRMC1 Membrane-associated progesterone receptor componen	PGRMC1	R.GLATFC*LDK.E	1.26		1.29	1.21154		1.29	2	1.25077	0.0554807	0.0443573	0.322816
1572	Q9BQ67	GRWD1 Glutamate-rich WD repeat-containing protein 1	GRWD1	R.RRTC*ETGEPMEAESGDTSSEGPAQVYLPGR.G	1.08	1.7		1.03846	1.46552		2	1.25199	0.301974	0.241195	0.324222
1240	Q09028	RBBP4 Histone-binding protein RBBP4	RBBP4	R.YMPQNPC*IIATK.T	1.12	1.58	1.32	1.07692	1.36207	1.32	3	1.253	0.153929	0.122848	0.325383
1190	P31689	DNAJA1 DnaJ homolog subfamily A member 1	DNAJA1	K.GAVEC*CPNCR.G	1.18	1.56	1.28	1.13462	1.34483	1.28	3	1.25315	0.107648	0.085902	0.325556
1138	P40222	TXLNA Alpha-taxilin	TXLNA	R.VTEAPC*YPGAPSTEASGQTGPQEPTSAR.A		1.47	1.24		1.26724	1.24	2	1.25362	0.0192626	0.0153655	0.326101
1372	Q9HAD4	WDR41 WD repeat-containing protein 41	WDR41	R.ISC*FQSTVK.C	1.05		1.5	1.00962		1.5	2	1.25481	0.346754	0.276341	0.327466
1100	Q6PKG0	LARP1 La-related protein 1	LARP1	R.TASISSSPSEGTPTVGSYGC*TPQSLPK.F	1.33	1.48	1.21	1.27885	1.27586	1.21	3	1.2549	0.0389155	0.0310108	0.327576
1089	Q9NQ88	TIGAR Fructose-2,6-bisphosphatase TIGAR	TIGAR	K.AAREEC*PVFTPPGGETLDQVK.M		1.52	1.2		1.31034	1.2	2	1.25517	0.0780256	0.0621632	0.327886
1101	Q9UEW8	STK39 STE20/SPS1-related proline-alanine-rich protein ki	STK39	K.LASGC*DGSEIPDEVK.L		1.51	1.21		1.30172	1.21	2	1.25586	0.0648588	0.0516448	0.328678
1293	Q15813	TBCE Tubulin-specific chaperone E	TBCE	R.NCAVSC*AGEK.G		1.34	1.36		1.15517	1.36	2	1.25759	0.144835	0.115169	0.330657
1336	P47756	CAPZB F-actin-capping protein subunit beta	CAPZB	K.GC*WDSIHVVEVQEK.S	1.14		1.42	1.09615		1.42	2	1.25808	0.228994	0.182019	0.33122
1130	P63208	SKP1 S-phase kinase-associated protein 1	SKP1	K.GLLDVTC*K.T	1.23	1.58	1.23	1.18269	1.36207	1.23	3	1.25825	0.0929661	0.073885	0.331423
1147	P60900	PSMA6 Proteasome subunit alpha type-6	PSMA6	K.CDPAGYYC*GFK.A		1.47	1.25		1.26724	1.25	2	1.25862	0.0121915	0.00968639	0.331844
1179	P62888	RPL30 60S ribosomal protein L30	RPL30	K.YYRVC*TLAIIDPGDSDIIR.S	1.19	1.58	1.27	1.14423	1.36207	1.27	3	1.25877	0.109353	0.0868729	0.332011
1253	P53396	ACLY ATP-citrate synthase	ACLY	K.FIC*TTSAIQNR.F	1.14	1.58	1.33	1.09615	1.36207	1.33	3	1.26274	0.145157	0.114954	0.336559
1091	P41250	GARS Glycine--tRNA ligase	GARS	K.NGEC*FR.A		1.54	1.2		1.32759	1.2	2	1.26379	0.0902171	0.071386	0.33776
1180	P08708	RPS17 40S ribosomal protein S17	RPS17	K.RVC*EEIAIIPSK.K	1.17	1.62	1.27	1.125	1.39655	1.27	3	1.26385	0.13588	0.107513	0.337826
1349	P14866	HNRNPL Heterogeneous nuclear ribonucleoprotein L	HNRNPL	K.QPAIMPGQSYGLEDGSC*SYK.D	1.19	1.39	1.45	1.14423	1.19828	1.45	3	1.26417	0.163187	0.129087	0.338189
1152	P61247	RPS3A 40S ribosomal protein S3a	RPS3A	K.LITEDVQGKNC*LTNFHGMDLTR.D	1.33		1.25	1.27885		1.25	2	1.26442	0.0203973	0.0161317	0.338479
1218	Q92945	KHSRP Far upstream element-binding protein 2	KHSRP	K.C*GLVIGR.G	1.15	1.61	1.3	1.10577	1.38793	1.3	3	1.26457	0.14438	0.114173	0.338643
1282	Q9Y2Z0	SUGT1 Protein SGT1 homolog	SUGT1	K.ALEQKPDDAQYYC*QR.A		1.37	1.35		1.18103	1.35	2	1.26552	0.119477	0.0944094	0.339727
1244	Q9P287	BCCIP BRCA2 and CDKN1A-interacting protein	BCCIP	R.KGTQC*VEQIQELVLR.F	1.26		1.32	1.21154		1.32	2	1.26577	0.0766939	0.0605907	0.340014
1186	P27348	YWHAQ 14-3-3 protein theta	YWHAQ	R.YLAEVAC*GDDR.K	1.4	1.36	1.28	1.34615	1.17241	1.28	3	1.26619	0.0876895	0.0692547	0.340493
1406	P43034	PAFAH1B1 Platelet-activating factor acetylhydrolase IB subu	PAFAH1B1	K.FILSC*ADDK.T	0.97		1.6	0.932692		1.6	2	1.26635	0.471858	0.372614	0.340672
1288	Q15185	PTGES3 Prostaglandin E synthase 3	PTGES3	K.HLNEIDLFHC*IDPNDSK.H	1.23		1.35	1.18269		1.35	2	1.26635	0.118304	0.0934219	0.340672
1140	P60604	UBE2G2 Ubiquitin-conjugating enzyme E2 G2	UBE2G2	R.VC*ISILHAPGDDPMGYESSAER.W	1.26	1.58	1.24	1.21154	1.36207	1.24	3	1.2712	0.0799691	0.0629082	0.346194
1148	P06400	RB1 Retinoblastoma-associated protein	RB1	K.INQMVC*NSDR.V		1.5	1.25		1.2931	1.25	2	1.27155	0.0304787	0.0239697	0.34659
1328	P34932	HSPA4 Heat shock 70 kDa protein 4	HSPA4	R.KFDEVLVNHFC*EEFGK.K	1.18		1.41	1.13462		1.41	2	1.27231	0.194726	0.15305	0.347448
1254	P00492	HPRT1 Hypoxanthine-guanine phosphoribosyltransferase	HPRT1	R.LKSYC*NDQSTGDIK.V	1.17	1.58	1.33	1.125	1.36207	1.33	3	1.27236	0.128618	0.101086	0.347503
914	P60866	RPS20 40S ribosomal protein S20	RPS20	K.SLEKVC*ADLIR.G		1.7	1.08		1.46552	1.08	2	1.27276	0.272602	0.214182	0.347959
1294	Q02543	RPL18A 60S ribosomal protein L18a	RPL18A	R.DLTTAGAVTQC*YR.D		1.38	1.36		1.18966	1.36	2	1.27483	0.120452	0.0944849	0.350302
1310	P26641	EEF1G Elongation factor 1-gamma	EEF1G	K.AAAPAPEEEMDEC*EQALAAEPK.A	1.17	1.52	1.39	1.125	1.31034	1.39	3	1.27511	0.135967	0.106631	0.350627
1139	P41227	NAA10 N-alpha-acetyltransferase 10	NAA10	K.GNSPPSSGEAC*R.E		1.52	1.24		1.31034	1.24	2	1.27517	0.0497413	0.0390075	0.350692
1289	P34932	HSPA4 Heat shock 70 kDa protein 4	HSPA4	R.GC*ALQCAILSPAFK.V	1.25		1.35	1.20192		1.35	2	1.27596	0.104706	0.0820606	0.351585
1281	P26599	PTBP1 Polypyrimidine tract-binding protein 1	PTBP1	K.RGSDELFSTC*VTNGPFIMSSNSASAANGNDSK.K	1.44	1.27	1.35	1.38462	1.09483	1.35	3	1.27648	0.158266	0.123986	0.352172
1386	Q08J23	NSUN2 tRNA (cytosine(34)-C(5))-methyltransferase	NSUN2	R.MVYSTC*SLNPIEDEAVIASLLEK.S	1.07		1.53	1.02885		1.53	2	1.27942	0.354369	0.276976	0.355493
1231	P28062	PSMB8 Proteasome subunit beta type-8	PSMB8	K.LLSNMMC*QYR.G	1.27	1.52	1.31	1.22115	1.31034	1.31	3	1.2805	0.0513952	0.0401368	0.356707
1252	Q9H2U1	DHX36 ATP-dependent RNA helicase DHX36	DHX36	K.NTPC*SENKLDIQEK.K		1.43	1.33		1.23276	1.33	2	1.28138	0.06876	0.053661	0.357698
841	Q8IV48	ERI1 3-5 exoribonuclease 1	ERI1	K.EIAITNGC*INR.M		1.76	1.05		1.51724	1.05	2	1.28362	0.33039	0.257389	0.360219
1170	P11940	PABPC1 Polyadenylate-binding protein 1	PABPC1	K.GFGFVC*FSSPEEATK.A	1.36		1.26	1.30769		1.26	2	1.28385	0.0337236	0.0262676	0.360472
1122	Q7L5Y9	MAEA Macrophage erythroblast attacher	MAEA	R.QDDKVVC*PR.T		1.57	1.22		1.35345	1.22	2	1.28672	0.0943622	0.0733352	0.363703
1295	O15067	PFAS Phosphoribosylformylglycinamidine synthase	PFAS	K.FC*DNSSAIQGK.E		1.41	1.36		1.21552	1.36	2	1.28776	0.102165	0.0793353	0.364862
1373	Q12788	TBL3 Transducin beta-like protein 3	TBL3	R.FLGPEDSHVVVASNSPC*LK.V	1.13		1.5	1.08654		1.5	2	1.29327	0.292361	0.226064	0.371023
1387	Q6P2E9	EDC4 Enhancer of mRNA-decapping protein 4	EDC4	K.LFC*VHTK.A	1.1		1.53	1.05769		1.53	2	1.29385	0.333972	0.258123	0.371666
1237	Q9UHI6	DDX20 Probable ATP-dependent RNA helicase DDX20	DDX20	R.C*GLDLIVQAK.S	1.33		1.31	1.27885		1.31	2	1.29442	0.0220291	0.0170185	0.372309
1103	Q5U5X0	LYRM7 Complex III assembly factor LYRM7	LYRM7	R.KDLLVENVPYC*DAPTQKQ.-		1.6	1.21		1.37931	1.21	2	1.29466	0.11972	0.0924729	0.372568
1264	P08238	HSP90AB1 Heat shock protein HSP 90-beta	HSP90AB1	K.C*LELFSELAEDKENYKK.F	1.31		1.33	1.25962		1.33	2	1.29481	0.0497694	0.0384377	0.372738
915	Q9H0C8	ILKAP Integrin-linked kinase-associated serine/threonine	ILKAP	R.C*GVTSVPDIR.R	1.13	2	1.08	1.08654	1.72414	1.08	3	1.29689	0.37002	0.285313	0.375058
1189	P51114	FXR1 Fragile X mental retardation syndrome-related prot	FXR1	K.KAVGAC*R.I		1.53	1.28		1.31897	1.28	2	1.29948	0.0275528	0.0212029	0.377937
1230	O75683	SURF6 Surfeit locus protein 6	SURF6	K.IC*SHSAPEQQAR.T		1.5	1.31		1.2931	1.31	2	1.30155	0.0119477	0.00917956	0.380233
1104	Q6I9Y2	THOC7 THO complex subunit 7 homolog	THOC7	K.IYKEIEC*SIAGAHEK.I		1.62	1.21		1.39655	1.21	2	1.30328	0.131912	0.101216	0.382142
1316	P23528	CFL1 Cofilin-1	CFL1	K.HELQANC*YEEVK.D	1.24	1.53	1.4	1.19231	1.31897	1.4	3	1.30376	0.104678	0.0802894	0.382676
1577	P12268	IMPDH2 Inosine-5-monophosphate dehydrogenase 2	IMPDH2	R.HGFC*GIPITDTGR.M	1.02	1.89		0.980769	1.62931		2	1.30504	0.458588	0.351398	0.384094
1329	Q16181	SEPT7 Septin-7	2020-09-07	R.GRQYPWGVAEVENGEHC*DFTILR.N	1.25		1.41	1.20192		1.41	2	1.30596	0.147133	0.112662	0.385112
1357	Q9UNM6	PSMD13 26S proteasome non-ATPase regulatory subunit 13	PSMD13	K.DRLEFWC*TDVK.S		1.34	1.46		1.15517	1.46	2	1.30759	0.215546	0.164842	0.386906
1283	P63208	SKP1 S-phase kinase-associated protein 1	SKP1	K.TFNIKNDFTEEEEAQVRKENQWC*EEK.-	1.43	1.4	1.35	1.375	1.2069	1.35	3	1.31063	0.0907031	0.0692056	0.390263
781	Q9HBM1	SPC25 Kinetochore protein Spc25	SPC25	K.STDTSC*QMAGLR.D		1.86	1.02		1.60345	1.02	2	1.31172	0.41256	0.314518	0.391464
1297	O00299	CLIC1 Chloride intracellular channel protein 1	CLIC1	K.IGNC*PFSQR.L	1.3	1.54	1.36	1.25	1.32759	1.36	3	1.31253	0.0565247	0.0430655	0.392349
1334	P62241	RPS8 40S ribosomal protein S8	RPS8	R.PGQC*GR.A	1.08	1.72	1.42	1.03846	1.48276	1.42	3	1.31374	0.240454	0.18303	0.39368
1245	Q15003	NCAPH Condensin complex subunit 2	NCAPH	K.FTNTQITEHYSTC*IK.L	1.36		1.32	1.30769		1.32	2	1.31385	0.00870285	0.00662395	0.393796
1239	P09234	SNRPC U1 small nuclear ribonucleoprotein C	SNRPC	K.THC*SGR.K		1.52	1.32		1.31034	1.32	2	1.31517	0.00682724	0.00519114	0.395252
1203	Q9P258	RCC2 Protein RCC2	RCC2	K.AVQDLC*GWR.I		1.56	1.29		1.34483	1.29	2	1.31741	0.038769	0.0294281	0.397709
1296	Q9H3R5	CENPH Centromere protein H	CENPH	R.AGGPPQVAGAQAAC*SEDR.M		1.48	1.36		1.27586	1.36	2	1.31793	0.0594945	0.0451423	0.398275
1308	Q9NSD9	FARSB Phenylalanine--tRNA ligase beta subunit	FARSB	K.TKEYTAC*ELMNIYK.T	1.31		1.38	1.25962		1.38	2	1.31981	0.0851248	0.0644979	0.400328
1207	P21333	FLNA Filamin-A	FLNA	K.AHVVPC*FDASK.V	1.17	1.81	1.29	1.125	1.56034	1.29	3	1.32511	0.219786	0.165862	0.406118
1353	P34932	HSPA4 Heat shock 70 kDa protein 4	HSPA4	K.KLMSANASDLPLSIEC*FMNDVDVSGTMNR.G	1.25		1.45	1.20192		1.45	2	1.32596	0.175417	0.132294	0.407039
1352	P48739	PITPNB Phosphatidylinositol transfer protein beta isoform	PITPNB	K.ELANSPDC*PQMCAYK.L	1.25		1.45	1.20192		1.45	2	1.32596	0.175417	0.132294	0.407039
1300	P41240	CSK Tyrosine-protein kinase CSK	CSK	K.YNFHGTAEQDLPFC*K.G	1.35		1.36	1.29808		1.36	2	1.32904	0.0437862	0.0329458	0.410383
1284	P49207	RPL34 60S ribosomal protein L34	RPL34	R.AYGGSMC*AK.C	1.23	1.69	1.35	1.18269	1.4569	1.35	3	1.32986	0.138207	0.103926	0.411278
1204	P46776	RPL27A 60S ribosomal protein L27a	RPL27A	K.IKSVGGAC*VLVA.-		1.59	1.29		1.37069	1.29	2	1.33034	0.0570562	0.0428883	0.4118
1337	Q9Y490	TLN1 Talin-1	TLN1	K.AGALQC*SPSDAYTK.K	1.3		1.42	1.25		1.42	2	1.335	0.120208	0.0900436	0.41684
975	P29401	TKT Transketolase	TKT	R.MAAISESNINLCGSHC*GVSIGEDGPSQMALEDLAMFR.S	1.84	1.3	1.12	1.76923	1.12069	1.12	3	1.33664	0.374635	0.280281	0.418611
1273	Q9Y5J1	UTP18 U3 small nucleolar RNA-associated protein 18 homol	UTP18	R.NGQYVACGSNC*GVVNIYNQDSCLQETNPKPIK.A	1.39		1.34	1.33654		1.34	2	1.33827	0.00244768	0.00182899	0.420368
1309	Q01518	CAP1 Adenylyl cyclase-associated protein 1	CAP1	K.TDGC*HAYLSK.N	1.35		1.38	1.29808		1.38	2	1.33904	0.0579284	0.0432612	0.421197
1388	O00410	IPO5 Importin-5	IPO5	K.STAC*QMLVCYAK.E	1.2		1.53	1.15385		1.53	2	1.34192	0.265981	0.198209	0.424302
1191	P41240	CSK Tyrosine-protein kinase CSK	CSK	R.SVLGGDC*LLK.F		1.64	1.28		1.41379	1.28	2	1.3469	0.094606	0.07024	0.429639
1171	Q9UJZ1	STOML2 Stomatin-like protein 2, mitochondrial	STOML2	R.ERESLNASIVDAINQAADC*WGIR.C	1.5		1.26	1.44231		1.26	2	1.35115	0.128911	0.0954081	0.434192
1365	P25398	RPS12 40S ribosomal protein S12	RPS12	K.LGEWVGLC*K.I	1.03	1.84	1.48	0.990385	1.58621	1.48	3	1.3522	0.317807	0.23503	0.435306
1265	Q12849	GRSF1 G-rich sequence factor 1	GRSF1	R.YIELFLNSC*PK.G	1.43		1.33	1.375		1.33	2	1.3525	0.0318198	0.0235267	0.435629
1274	P42704	LRPPRC Leucine-rich PPR motif-containing protein, mitocho	LRPPRC	R.IHDVLC*K.L	1.42		1.34	1.36538		1.34	2	1.35269	0.0179496	0.0132696	0.435834
1391	P62851	RPS25 40S ribosomal protein S25	RPS25	K.ATYDKLC*K.E	1.14	1.65	1.54	1.09615	1.42241	1.54	3	1.35286	0.229953	0.169976	0.436008
1313	P55212	CASP6 Caspase-6	CASP6	R.GTC*ADRDNLTR.R	1.37		1.39	1.31731		1.39	2	1.35365	0.0514012	0.0379722	0.436859
1317	P62910	RPL32 60S ribosomal protein L32	RPL32	K.SYC*AEIAHNVSSK.N	1.19	1.76	1.4	1.14423	1.51724	1.4	3	1.35382	0.190744	0.140893	0.43704
1344	P63244	RACK1 Receptor of activated protein C kinase 1	RACK1	K.VWNLANC*K.L	1.24	1.66	1.44	1.19231	1.43103	1.44	3	1.35445	0.140489	0.103724	0.437704
1393	P23921	RRM1 Ribonucleoside-diphosphate reductase large subunit	RRM1	K.IIDINYYPVPEAC*LSNKR.H	1.2	1.58	1.55	1.15385	1.36207	1.55	3	1.35531	0.198164	0.146213	0.438618
1384	P49458	SRP9 Signal recognition particle 9 kDa protein	SRP9	K.VTDDLVC*LVYK.T	1.23	1.57	1.53	1.18269	1.35345	1.53	3	1.35538	0.173662	0.128128	0.438698
1193	Q9BRX5	GINS3 DNA replication complex GINS protein PSF3	GINS3	K.GLNDFQC*WEK.G		1.66	1.28		1.43103	1.28	2	1.35552	0.106798	0.0787873	0.438843
1219	Q9ULV4	CORO1C Coronin-1C	CORO1C	K.SIKDTIC*NQDER.I		1.64	1.3		1.41379	1.3	2	1.3569	0.0804639	0.0592999	0.440311
1343	Q96Q11	TRNT1 CCA tRNA nucleotidyltransferase 1, mitochondrial	TRNT1	K.YQGEHC*LLK.E		1.48	1.44		1.27586	1.44	2	1.35793	0.116063	0.0854705	0.44141
884	O15533	TAPBP Tapasin	TAPBP	K.WASGLTPAQNC*PR.A	1.9	1.37	1.07	1.82692	1.18103	1.07	3	1.35932	0.408745	0.300698	0.442884
1220	Q01813	PFKP ATP-dependent 6-phosphofructokinase, platelet type	PFKP	K.AAC*NLLQR.G		1.65	1.3		1.42241	1.3	2	1.36121	0.0865596	0.0635904	0.444886
1303	Q02543	RPL18A 60S ribosomal protein L18a	RPL18A	K.VEEIAASKC*R.R		1.57	1.37		1.35345	1.37	2	1.36172	0.0117038	0.00859487	0.445434
1255	P63244	RACK1 Receptor of activated protein C kinase 1	RACK1	R.FSPNSSNPIIVSC*GWDK.L	1.36	1.68	1.33	1.30769	1.44828	1.33	3	1.36199	0.0755541	0.0554734	0.445715
1345	P00338	LDHA L-lactate dehydrogenase A chain	LDHA	K.NRVIGSGC*NLDSAR.F	1.24	1.69	1.44	1.19231	1.4569	1.44	3	1.36307	0.148124	0.10867	0.446858
1327	P62241	RPS8 40S ribosomal protein S8	RPS8	K.NC*IVLIDSTPYR.Q	1.03	1.96	1.41	0.990385	1.68966	1.41	3	1.36335	0.351962	0.25816	0.447152
1325	P78559	MAP1A Microtubule-associated protein 1A	MAP1A	R.SAPC*GSLAFSGDR.A		1.53	1.41		1.31897	1.41	2	1.36448	0.0643711	0.0471762	0.448354
1376	O14979	HNRNPDL Heterogeneous nuclear ribonucleoprotein D-like	HNRNPDL	R.YHQIGSGKC*EIK.V	1.27		1.51	1.22115		1.51	2	1.36558	0.204245	0.149567	0.449511
1131	P53602	MVD Diphosphomevalonate decarboxylase	MVD	R.DGDPLPSSLSC*K.V	1.55	1.61	1.23	1.49038	1.38793	1.23	3	1.36944	0.131174	0.0957864	0.453585
1363	P63220	RPS21 40S ribosomal protein S21	RPS21	K.C*SASNR.I	1.19	1.75	1.47	1.14423	1.50862	1.47	3	1.37428	0.200165	0.145651	0.45868
1401	O14818	PSMA7 Proteasome subunit alpha type-7	PSMA7	R.KICALDDNVC*MAFAGLTADAR.I	1.22		1.58	1.17308		1.58	2	1.37654	0.287738	0.20903	0.461045
1044	Q99439	CNN2 Calponin-2	CNN2	K.LGTDKC*DNSSMSLQMGYTQGANQSGQVFGLGR.Q		1.84	1.17		1.58621	1.17	2	1.3781	0.294303	0.213556	0.462684
1394	Q9UJU2	LEF1 Lymphoid enhancer-binding factor 1	LEF1	R.ANVVAEC*TLK.E		1.39	1.56		1.19828	1.56	2	1.37914	0.255778	0.185462	0.463767
1241	Q9BY32	ITPA Inosine triphosphate pyrophosphatase	ITPA	R.GC*QDFGWDPCFQPDGYEQTYAEMPK.A		1.67	1.32		1.43966	1.32	2	1.37983	0.084609	0.0613185	0.464488
1232	Q9ULA0	DNPEP Aspartyl aminopeptidase	DNPEP	R.ISASC*QHPTAFEEAIPK.S	1.38	1.75	1.31	1.32692	1.50862	1.31	3	1.38185	0.110114	0.0796861	0.466599
1150	Q7RTV0	PHF5A PHD finger-like domain-containing protein 5A	PHF5A	R.IC*DEC*NYGSYQGR.C	1.09	2.15	1.25	1.04808	1.85345	1.25	3	1.38384	0.419036	0.302806	0.468679
1326	Q4G0F5	VPS26B Vacuolar protein sorting-associated protein 26B	VPS26B	R.TPSQLSDNNC*RQ.-		1.58	1.41		1.36207	1.41	2	1.38603	0.0338924	0.0244528	0.470963
1266	Q96B54	ZNF428 Zinc finger protein 428	ZNF428	R.LC*CPATAPQEAPAPEGR.A	1.51		1.33	1.45192		1.33	2	1.39096	0.0862126	0.0619806	0.476083
1141	P30042	C21orf33 ES1 protein homolog, mitochondrial	C21orf33	K.NLSTFAVDGKDC*K.V		1.79	1.24		1.5431	1.24	2	1.39155	0.214327	0.15402	0.476695
1307	P61758	VBP1 Prefoldin subunit 3	VBP1	K.DSC*GKGEMATGNGR.R	1.26	1.84	1.38	1.21154	1.58621	1.38	3	1.39258	0.187651	0.13475	0.477762
1432	Q9P013	CWC15 Spliceosome-associated protein CWC15 homolog	CWC15	R.RWDDDVVFKNC*AK.G		1.25	1.71		1.07759	1.71	2	1.39379	0.447184	0.32084	0.479016
1417	P50452	SERPINB8 Serpin B8	SERPINB8	K.TNC*ILFCGR.F	1.19		1.65	1.14423		1.65	2	1.39712	0.357633	0.255979	0.482451
1456	Q9BV79	MECR Enoyl-[acyl-carrier-protein] reductase, mitochondr	MECR	R.LALNC*VGGK.S	1.09	1.42	1.92	1.04808	1.22414	1.92	3	1.3974	0.461062	0.329942	0.48275
1105	P10809	HSPD1 60 kDa heat shock protein, mitochondrial	HSPD1	R.AAVEEGIVLGGGC*ALLR.C	1.44	1.86	1.21	1.38462	1.60345	1.21	3	1.39935	0.197138	0.140878	0.484762
1233	P17812	CTPS1 CTP synthase 1	CTPS1	R.C*SNPLDTSVK.E		1.75	1.31		1.50862	1.31	2	1.40931	0.140446	0.0996559	0.494989
1396	Q9BW85	CCDC94 Coiled-coil domain-containing protein 94	CCDC94	K.ADPDC*SNGQPQAAPTPGAPQNRK.E		1.45	1.57		1.25	1.57	2	1.41	0.226274	0.160478	0.495695
1439	Q9NZZ3	CHMP5 Charged multivesicular body protein 5	CHMP5	K.APPPSLTDC*IGTVDSR.A	1.29	1.45	1.74	1.24038	1.25	1.74	3	1.41013	0.285718	0.202618	0.495826
1426	Q9Y314	NOSIP Nitric oxide synthase-interacting protein	NOSIP	K.NC*TAGAVYTYHEK.K	1.18		1.69	1.13462		1.69	2	1.41231	0.392716	0.278067	0.498054
1256	Q14151	SAFB2 Scaffold attachment factor B2	SAFB2	K.ILDILGETC*K.S		1.74	1.33		1.5	1.33	2	1.415	0.120208	0.0849528	0.500802
1339	Q29RF7	PDS5A Sister chromatid cohesion protein PDS5 homolog A	PDS5A	R.LLVAC*CLADIFR.I		1.63	1.43		1.40517	1.43	2	1.41759	0.0175558	0.0123843	0.503436
1404	Q9NQR4	NIT2 Omega-amidase NIT2	NIT2	R.VGLGIC*YDMR.F	1.35	1.59	1.6	1.29808	1.37069	1.6	3	1.42292	0.157593	0.110753	0.508857
1443	Q5UIP0	RIF1 Telomere-associated protein RIF1	RIF1	K.C*LISEMAK.E	1.13		1.77	1.08654		1.77	2	1.42827	0.48328	0.338368	0.514268
1362	Q8WXI9	GATAD2B Transcriptional repressor p66-beta	GATAD2B	R.TTTPNMNPAINYQPQSSSSVPC*QR.T		1.61	1.47		1.38793	1.47	2	1.42897	0.0580315	0.0406109	0.514971
1358	P78417	GSTO1 Glutathione S-transferase omega-1	GSTO1	K.LNEC*VDHTPK.L	1.45	1.67	1.46	1.39423	1.43966	1.46	3	1.4313	0.0336721	0.0235256	0.517321
1422	P29144	TPP2 Tripeptidyl-peptidase 2	TPP2	K.KETGAASFLC*R.Y	1.23		1.68	1.18269		1.68	2	1.43135	0.35165	0.245678	0.517373
1390	O14653	GOSR2 Golgi SNAP receptor complex member 2	GOSR2	K.QVHEIQSC*MGR.L		1.54	1.54		1.32759	1.54	2	1.43379	0.150199	0.104757	0.519837
1333	Q16644	MAPKAPK3 MAP kinase-activated protein kinase 3	MAPKAPK3	R.KKQAGSSSASQGC*NNQ.-		1.69	1.42		1.4569	1.42	2	1.43845	0.0260898	0.0181375	0.524513
1314	Q86W50	METTL16 U6 small nuclear RNA (adenine-(43)-N(6))-methyltra	METTL16	K.VTYTEFC*QGR.T	1.55		1.39	1.49038		1.39	2	1.44019	0.0709826	0.0492869	0.526261
1332	Q96EP5	DAZAP1 DAZ-associated protein 1	DAZAP1	R.NIDPKPC*TPR.G	1.52	1.68	1.42	1.46154	1.44828	1.42	3	1.44327	0.0212166	0.0147004	0.529343
1421	Q96SI9	STRBP Spermatid perinuclear RNA-binding protein	STRBP	R.TLC*GVMR.I	1.42	1.5	1.68	1.36538	1.2931	1.68	3	1.44616	0.205709	0.142244	0.53223
1374	P63220	RPS21 40S ribosomal protein S21	RPS21	K.TYAIC*GAIR.R	1.27	1.89	1.51	1.22115	1.62931	1.51	3	1.45349	0.209865	0.144387	0.539519
1423	B2RPK0	HMGB1P1 Putative high mobility group protein B1-like 1	HMGB1P1	K.MSSYAFFVQTC*R.E	1.29		1.68	1.24038		1.68	2	1.46019	0.310855	0.212886	0.546158
1416	Q9UJX4	ANAPC5 Anaphase-promoting complex subunit 5	ANAPC5	K.LIEESC*PQLANSVQIR.I		1.48	1.65		1.27586	1.65	2	1.46293	0.264555	0.180839	0.548862
1446	Q9ULC4	MCTS1 Malignant T-cell-amplified sequence 1	MCTS1	K.FDEKENVSNC*IQLK.T	1.32	1.5	1.84	1.26923	1.2931	1.84	3	1.46744	0.322863	0.220017	0.553306
1379	P07814	EPRS Bifunctional glutamate/proline--tRNA ligase	EPRS	K.ERPTPSLNNNC*TTSEDSLVLYNR.V	1.13	2.09	1.52	1.08654	1.80172	1.52	3	1.46942	0.360266	0.245175	0.555248
1106	P32969	RPL9 60S ribosomal protein L9	RPL9	R.TIC*SHVQNMIK.G	1.49	2.05	1.21	1.43269	1.76724	1.21	3	1.46998	0.280486	0.190809	0.555794
1576	Q93009	USP7 Ubiquitin carboxyl-terminal hydrolase 7	USP7	K.MKGTC*VEGTIPK.L	1.39	1.87		1.33654	1.61207		2	1.4743	0.194829	0.13215	0.560034
1382	Q9Y3F4	STRAP Serine-threonine kinase receptor-associated protei	STRAP	K.IGFPETTEEELEEIASENSDC*IFPSAPDVK.A	1.49		1.52	1.43269		1.52	2	1.47635	0.0617359	0.0418167	0.562031
1397	P49915	GMPS GMP synthase [glutamine-hydrolyzing]	GMPS	R.VICAEEPYIC*KDFPETNNILK.I		1.64	1.57		1.41379	1.57	2	1.4919	0.110455	0.0740366	0.577148
1385	Q92499	DDX1 ATP-dependent RNA helicase DDX1	DDX1	R.GKGC*YNTR.L		1.69	1.53		1.4569	1.53	2	1.49345	0.0516919	0.0346125	0.578647
1234	Q8IWX8	CHERP Calcium homeostasis endoplasmic reticulum protein	CHERP	K.LALEQQQLIC*K.Q		1.96	1.31		1.68966	1.31	2	1.49983	0.268457	0.178992	0.584797
1410	Q9UHX1	PUF60 Poly(U)-binding-splicing factor PUF60	PUF60	R.ALAIMC*R.V	1.44		1.62	1.38462		1.62	2	1.50231	0.166442	0.110791	0.58718
1436	Q9Y508	RNF114 E3 ubiquitin-protein ligase RNF114	RNF114	R.SHVATC*SK.Y		1.49	1.73		1.28448	1.73	2	1.50724	0.315028	0.20901	0.59191
1366	P63244	RACK1 Receptor of activated protein C kinase 1	RACK1	K.YTVQDESHSEWVSC*VR.F	1.5	1.86	1.48	1.44231	1.60345	1.48	3	1.50859	0.0842877	0.055872	0.593196
1398	Q99614	TTC1 Tetratricopeptide repeat protein 1	TTC1	R.ALEMCPSC*FQK.E		1.68	1.57		1.44828	1.57	2	1.50914	0.086072	0.0570339	0.593725
1442	P14649	MYL6B Myosin light chain 6B	MYL6B	K.ILYSQC*GDVMR.A		1.46	1.76		1.25862	1.76	2	1.50931	0.354529	0.234895	0.593889
1402	Q15393	SF3B3 Splicing factor 3B subunit 3	SF3B3	R.SEHPPLC*GR.D	1.42	1.85	1.59	1.36538	1.59483	1.59	3	1.51674	0.131098	0.0864339	0.600971
1419	Q02543	RPL18A 60S ribosomal protein L18a	RPL18A	K.KSSGEIVYC*GQVFEK.S	1.49	1.7	1.66	1.43269	1.46552	1.66	3	1.5194	0.122862	0.0808617	0.603505
1359	P63244	RACK1 Receptor of activated protein C kinase 1	RACK1	K.LWNTLGVC*K.Y	1.54	1.88	1.46	1.48077	1.62069	1.46	3	1.52049	0.0873978	0.0574802	0.604533
1272	Q00610	CLTC Clathrin heavy chain 1	CLTC	R.HSSLAGC*QIINYR.T		1.98	1.34		1.7069	1.34	2	1.52345	0.259435	0.170295	0.607341
1424	Q92598	HSPH1 Heat shock protein 105 kDa	HSPH1	K.FIC*EQDHQNFLR.L	1.43		1.68	1.375		1.68	2	1.5275	0.215668	0.14119	0.611172
1371	P41252	IARS Isoleucine--tRNA ligase, cytoplasmic	IARS	K.MGITEYNNQC*R.A		1.81	1.5		1.56034	1.5	2	1.53017	0.0426702	0.0278859	0.613694
1311	P43403	ZAP70 Tyrosine-protein kinase ZAP-70	ZAP70	K.VEGPPGSTQKAEAAC*A.-		2	1.39		1.72414	1.39	2	1.55707	0.236271	0.151741	0.638833
1430	Q14566	MCM6 DNA replication licensing factor MCM6	MCM6	R.LGFSEYC*R.I	1.5		1.7	1.44231		1.7	2	1.57115	0.182216	0.115976	0.651824
1437	O95571	ETHE1 Persulfide dioxygenase ETHE1, mitochondrial	ETHE1	R.TDFQQGC*AK.T		1.64	1.73		1.41379	1.73	2	1.5719	0.223592	0.142243	0.652506
1454	O15382	BCAT2 Branched-chain-amino-acid aminotransferase, mitoch	BCAT2	R.EVFGSGTAC*QVCPVHR.I	1.3		1.9	1.25		1.9	2	1.575	0.459619	0.291822	0.655352
1407	Q9BWJ5	SF3B5 Splicing factor 3B subunit 5	SF3B5	K.MLQPC*GPPADKPEEN.-	1.5	1.98	1.61	1.44231	1.7069	1.61	3	1.5864	0.133864	0.084382	0.665758
1413	O94925	GLS Glutaminase kidney isoform, mitochondrial	GLS	R.LKEC*MDMLR.L	1.34	2.17	1.64	1.28846	1.87069	1.64	3	1.59972	0.293197	0.18328	0.677817
1340	A0FGR8	ESYT2 Extended synaptotagmin-2	ESYT2	R.AC*DLPAWVHFPDTER.A	1.86		1.43	1.78846		1.43	2	1.60923	0.253471	0.15751	0.686371
1433	P25398	RPS12 40S ribosomal protein S12	RPS12	K.VVGC*SCVVVK.D	1.23	2.29	1.71	1.18269	1.97414	1.71	3	1.62228	0.402949	0.248385	0.69802
1455	Q7Z2W4	ZC3HAV1 Zinc finger CCCH-type antiviral protein 1	ZC3HAV1	R.QQIC*NQQPPCSR.L		1.56	1.91		1.34483	1.91	2	1.62741	0.399637	0.245566	0.702581
1428	P62273	RPS29 40S ribosomal protein S29	RPS29	K.YGLNMC*R.Q	1.27	2.33	1.7	1.22115	2.00862	1.7	3	1.64326	0.396788	0.241464	0.716559
1367	P49903	SEPHS1 Selenide, water dikinase 1	SEPHS1	R.FTELKGTGC*K.V		2.1	1.48		1.81034	1.48	2	1.64517	0.233589	0.141985	0.718239
1449	O00273	DFFA DNA fragmentation factor subunit alpha	DFFA	R.EQHGVAASC*LEDLR.S		1.79	1.87		1.5431	1.87	2	1.70655	0.231151	0.135449	0.771084
1411	O95707	POP4 Ribonuclease P protein subunit p29	POP4	R.DLC*SGLKPDTQPQMIQAK.L	1.91		1.62	1.83654		1.62	2	1.72827	0.153116	0.0885949	0.789328
1405	Q96F15	GIMAP5 GTPase IMAP family member 5	GIMAP5	R.TGAGAC*QEDYRQYQAK.V		2.21	1.6		1.90517	1.6	2	1.75259	0.215789	0.123126	0.809485
1429	P62241	RPS8 40S ribosomal protein S8	RPS8	K.LLAC*IASR.P	1.53	2.59	1.7	1.47115	2.23276	1.7	3	1.8013	0.390778	0.216942	0.849042
1434	P10809	HSPD1 60 kDa heat shock protein, mitochondrial	HSPD1	R.C*IPALDSLTPANEDQK.I	1.98	2.26	1.72	1.90385	1.94828	1.72	3	1.85737	0.121026	0.0651596	0.893264
1445	P10809	HSPD1 60 kDa heat shock protein, mitochondrial	HSPD1	K.C*EFQDAYVLLSEK.K	2.35	2.17	1.83	2.25962	1.87069	1.83	3	1.98677	0.237167	0.119373	0.990424
1448	O60880	SH2D1A SH2 domain-containing protein 1A	SH2D1A	R.STQGTTGIREDPDVC*LKAP.-		2.6	1.86		2.24138	1.86	2	2.05069	0.269676	0.131505	1.03611
1420	P55072	VCP Transitional endoplasmic reticulum ATPase	VCP	K.AIANEC*QANFISIK.G		2.91	1.66		2.50862	1.66	2	2.08431	0.600065	0.287896	1.05957
1473	Q9NVX0	HAUS2 HAUS augmin-like complex subunit 2	HAUS2	R.KQQNEVSSC*IPK.I		2.28	2.56		1.96552	2.56	2	2.26276	0.420363	0.185774	1.17808
1450	Q9NVN8	GNL3L Guanine nucleotide-binding protein-like 3-like pro	GNL3L	R.AC*SVGAVPGITK.F	2.76		1.89	2.65385		1.89	2	2.27192	0.540121	0.237737	1.18391
1587	P17987	TCP1 T-complex protein 1 subunit alpha	TCP1	R.LAC*KEAVR.Y	3.3	3.9		3.17308	3.36207		2	3.26757	0.133638	0.0408981	1.70822
1485	P04406	GAPDH Glyceraldehyde-3-phosphate dehydrogenase	GAPDH	K.IISNASC*TTNCLAPLAK.V	13.07	20	9.57	12.5673	17.2414	9.57	3	13.1262	3.86611	0.294533	3.71438

## Sheet: Jurkat 5uM KA
index	ipi	description	symbol	sequence	mr.set_1	mr.set_2	mr.set_3	Corrected mr.set_1	Corrected mr.set_2	Corrected mr.set_3	Count	Average	St. Dev	St. Dev/Average	Average Ratio (log2)
8	P50416	CPT1A Carnitine O-palmitoyltransferase 1, liver isoform	CPT1A	R.TLETANC*MSSQTK.N	0.63		0.37	0.533898		0.37	2	0.451949	0.115894	0.256431	-1.14577
12	Q13905	RAPGEF1 Rap guanine nucleotide exchange factor 1	RAPGEF1	R.IQHSSALSSC*YSR.V		0.57	0.4		0.518182	0.4	2	0.459091	0.0835672	0.182027	-1.12315
67	Q9BVQ7	SPATA5L1 Spermatogenesis-associated protein 5-like protein	SPATA5L1	K.GVLLYGPPGC*AK.T	0.41		0.59	0.347458		0.59	2	0.468729	0.171503	0.36589	-1.09317
1310	O60763	USO1 General vesicular transport factor p115	USO1	R.VLVSPTNPPGATSSC*QK.A	0.75	0.38		0.635593	0.345455		2	0.490524	0.205159	0.418245	-1.0276
63	Q9UL40	ZNF346 Zinc finger protein 346	ZNF346	K.NQC*LFTNTQCK.V	0.49		0.58	0.415254		0.58	2	0.497627	0.116493	0.234097	-1.00686
74	P51649	ALDH5A1 Succinate-semialdehyde dehydrogenase, mitochondria	ALDH5A1	R.NTGQTC*VCSNQFLVQR.G	0.48		0.6	0.40678		0.6	2	0.50339	0.136627	0.271415	-0.990252
26	O43169	CYB5B Cytochrome b5 type B	CYB5B	K.DPSKNDTC*K.S	0.61		0.49	0.516949		0.49	2	0.503475	0.0190559	0.0378488	-0.990009
1316	Q9UBB4	ATXN10 Ataxin-10	ATXN10	R.NACIEC*SVNQNSIR.N	0.52	0.63		0.440678	0.572727		2	0.506703	0.093373	0.184276	-0.980789
17	Q86Y56	DNAAF5 Dynein assembly factor 5, axonemal	DNAAF5	R.RPPEAC*EELR.L	0.67		0.45	0.567797		0.45	2	0.508898	0.0832948	0.163677	-0.974551
75	Q9H6R4	NOL6 Nucleolar protein 6	NOL6	R.LQAAC*HR.L	0.5		0.6	0.423729		0.6	2	0.511864	0.124643	0.243507	-0.966166
28	Q6P996	PDXDC1 Pyridoxal-dependent decarboxylase domain-containin	PDXDC1	R.ERHSC*DALNR.W	0.62		0.5	0.525424		0.5	2	0.512712	0.0179773	0.0350631	-0.96378
146	P62979	RPS27A Ubiquitin-40S ribosomal protein S27a	RPS27A	K.C*CLTYCFNKPEDK.-	0.48		0.66	0.40678		0.66	2	0.53339	0.179054	0.33569	-0.906738
68	P37268	FDFT1 Squalene synthase	FDFT1	K.C*LGHPEEFYNLVR.F	0.58		0.59	0.491525		0.59	2	0.540763	0.069632	0.128766	-0.886932
114	Q00765	REEP5 Receptor expression-enhancing protein 5	REEP5	K.NC*MTDLLAK.L	0.55		0.63	0.466102		0.63	2	0.548051	0.115894	0.211465	-0.867618
215	P62979	RPS27A Ubiquitin-40S ribosomal protein S27a	RPS27A	R.ECPSDEC*GAGVFMASHFDR.H	0.47		0.7	0.398305		0.7	2	0.549153	0.213331	0.388472	-0.864721
1304	Q9H8V3	ECT2 Protein ECT2	ECT2	K.INQAKPEC*GR.Q	1.13	0.16		0.957627	0.145455		2	0.551541	0.574293	1.04125	-0.85846
13	Q92973	TNPO1 Transportin-1	TNPO1	R.SNILTLMYQC*MQDK.M	0.84		0.4	0.711864		0.4	2	0.555932	0.220521	0.39667	-0.847019
57	Q8WUW1	BRK1 Protein BRICK1	BRK1	K.IADFLNSFDMSC*R.S	0.67	0.59	0.57	0.567797	0.536364	0.57	3	0.558053	0.0188162	0.0337175	-0.841525
147	Q9NX70	MED29 Mediator of RNA polymerase II transcription subuni	MED29	R.LAHEC*LSQSCDSAK.H	0.54		0.66	0.457627		0.66	2	0.558814	0.143099	0.256077	-0.839561
42	O15042	U2SURP U2 snRNP-associated SURP motif-containing protein	U2SURP	R.VMTC*FR.A	0.71	0.62	0.52	0.601695	0.563636	0.52	3	0.561777	0.0408792	0.0727676	-0.83193
9	Q9NVI1	FANCI Fanconi anemia group I protein	FANCI	K.GVLSGEEC*KK.Q	0.87		0.39	0.737288		0.39	2	0.563644	0.24557	0.435682	-0.827144
89	O95336	PGLS 6-phosphogluconolactonase	PGLS	R.AAC*CLAGAR.A	0.63	0.64	0.61	0.533898	0.581818	0.61	3	0.575239	0.0384751	0.0668854	-0.797767
76	Q9NQC3	RTN4 Reticulon-4	RTN4	K.YSNSALGHVNC*TIK.E	0.65		0.6	0.550847		0.6	2	0.575424	0.0347561	0.0604009	-0.797303
35	P45984	MAPK9 Mitogen-activated protein kinase 9	MAPK9	R.TAC*TNFMMTPYVVTR.Y	0.76		0.51	0.644068		0.51	2	0.577034	0.0948002	0.164289	-0.793272
15	Q9NR30	DDX21 Nucleolar RNA helicase 2	DDX21	K.KLSVAC*FYGGTPYGGQFER.M		0.8	0.43		0.727273	0.43	2	0.578636	0.210204	0.363274	-0.789271
5	Q00610	CLTC Clathrin heavy chain 1	CLTC	R.HSSLAGC*QIINYR.T	1		0.32	0.847458		0.32	2	0.583729	0.372969	0.638942	-0.77663
78	P16455	MGMT Methylated-DNA--protein-cysteine methyltransferase	MGMT	R.VVC*SSGAVGNYSGGLAVK.E	0.67		0.6	0.567797		0.6	2	0.583898	0.0227712	0.0389986	-0.776211
77	P30519	HMOX2 Heme oxygenase 2	HMOX2	R.KC*PFYAAEQDK.G	0.67		0.6	0.567797		0.6	2	0.583898	0.0227712	0.0389986	-0.776211
1451	Q9UBE0	SAE1 SUMO-activating enzyme subunit 1	SAE1	K.GNGIVEC*LGPK.-	0.04	1.26		0.0338983	1.14545		2	0.589676	0.785989	1.33292	-0.762005
1306	Q96T76	MMS19 MMS19 nucleotide excision repair protein homolog	MMS19	R.LSFLKEDSQSC*R.V	1.17	0.22		0.991525	0.2		2	0.595763	0.559693	0.939456	-0.74719
34	P04406	GAPDH Glyceraldehyde-3-phosphate dehydrogenase	GAPDH	R.VPTANVSVVDLTC*R.L	1.03	0.46	0.51	0.872881	0.418182	0.51	3	0.600354	0.240439	0.400495	-0.736114
144	P05388	RPLP0 60S acidic ribosomal protein P0	RPLP0	K.C*FIVGADNVGSK.Q	0.98	0.35	0.66	0.830508	0.318182	0.66	3	0.602897	0.260893	0.432733	-0.730017
1328	P54136	RARS Arginine--tRNA ligase, cytoplasmic	RARS	K.NC*GCLGASPNLEQLQEENLK.L	0.69	0.69		0.584746	0.627273		2	0.606009	0.0300711	0.0496215	-0.722588
344	P50570	DNM2 Dynamin-2	DNM2	K.TEHAEFLHC*K.S	1.14	0.07	0.8	0.966102	0.0636364	0.8	3	0.609913	0.480324	0.787529	-0.713325
36	Q9UBB4	ATXN10 Ataxin-10	ATXN10	R.NAC*IEC*SVNQNSIR.N	0.84		0.51	0.711864		0.51	2	0.610932	0.14274	0.233642	-0.710916
43	Q96IJ6	GMPPA Mannose-1-phosphate guanyltransferase alpha	GMPPA	K.LLPAITILGC*R.V	0.83		0.52	0.70339		0.52	2	0.611695	0.129676	0.211995	-0.709116
22	P55060	CSE1L Exportin-2	CSE1L	R.AAC*DLVR.G	0.88		0.48	0.745763		0.48	2	0.612881	0.187923	0.306622	-0.70632
225	Q9Y6C9	MTCH2 Mitochondrial carrier homolog 2	MTCH2	K.TYC*CDLK.M	0.61		0.71	0.516949		0.71	2	0.613475	0.136508	0.222515	-0.704925
122	Q6UX07	DHRS13 Dehydrogenase/reductase SDR family member 13	DHRS13	R.VVVVASAAHC*R.G	0.7		0.64	0.59322		0.64	2	0.61661	0.0330782	0.0536453	-0.697569
226	Q9HCU9	BRMS1 Breast cancer metastasis-suppressor 1	BRMS1	R.NKYEC*ELQGAK.Q	0.62		0.71	0.525424		0.71	2	0.617712	0.130515	0.211288	-0.694994
198	Q9Y6C9	MTCH2 Mitochondrial carrier homolog 2	MTCH2	R.LC*SGVLGTVVHGK.V	0.65		0.69	0.550847		0.69	2	0.620424	0.0983957	0.158594	-0.688674
29	O15091	KIAA0391 Mitochondrial ribonuclease P protein 3	KIAA0391	R.DHKAC*LPDAK.T	0.88		0.5	0.745763		0.5	2	0.622881	0.17378	0.278995	-0.682971
102	Q9Y4R8	TELO2 Telomere length regulation protein TEL2 homolog	TELO2	K.AC*VHGR.Q	0.74		0.62	0.627119		0.62	2	0.623559	0.00503364	0.00807243	-0.681401
115	Q8N5L8	RPP25L Ribonuclease P protein subunit p25-like protein	RPP25L	R.DPLDPNEC*GYQPPGAPPGLGSMPSSSCGPR.S	0.73		0.63	0.618644		0.63	2	0.624322	0.00802986	0.0128617	-0.679638
274	A6NDU8	C5orf51 UPF0600 protein C5orf51	C5orf51	R.C*PIQLNEGVSFQDLDTAK.L	0.59		0.75	0.5		0.75	2	0.625	0.176777	0.282843	-0.678072
79	O00567	NOP56 Nucleolar protein 56	NOP56	K.GLTDLSAC*K.A	0.77		0.6	0.652542		0.6	2	0.626271	0.0371531	0.0593242	-0.675141
50	O14980	XPO1 Exportin-1	XPO1	R.TSESLC*QNNMVILK.L	0.83		0.55	0.70339		0.55	2	0.626695	0.108463	0.173071	-0.674165
91	Q6UB35	MTHFD1L Monofunctional C1-tetrahydrofolate synthase, mitoc	MTHFD1L	K.IDRYTQQGFGNLPIC*MAK.T	0.76		0.61	0.644068		0.61	2	0.627034	0.0240896	0.0384183	-0.673385
334	P52292	KPNA2 Importin subunit alpha-1	KPNA2	K.YGAVDPLLALLAVPDMSSLAC*GYLR.N	0.99	0.28	0.79	0.838983	0.254545	0.79	3	0.627843	0.324211	0.516389	-0.671525
69	P38606	ATP6V1A V-type proton ATPase catalytic subunit A	ATP6V1A	R.VLDALFPCVQGGTTAIPGAFGC*GK.T	0.79		0.59	0.669492		0.59	2	0.629746	0.056209	0.0892566	-0.667159
23	P56192	MARS Methionine--tRNA ligase, cytoplasmic	MARS	R.LFVSDGVPGC*LPVLAAAGR.A	0.92		0.48	0.779661		0.48	2	0.629831	0.211892	0.336428	-0.666964
30	Q13155	AIMP2 Aminoacyl tRNA synthase complex-interacting multif	AIMP2	R.SC*ENLAPFNTALK.L	0.9		0.5	0.762712		0.5	2	0.631356	0.185765	0.294232	-0.663475
18	Q01780	EXOSC10 Exosome component 10	EXOSC10	R.LLQC*MSR.V	0.96		0.45	0.813559		0.45	2	0.63178	0.257075	0.406907	-0.662507
37	O60264	SMARCA5 SWI/SNF-related matrix-associated actin-dependent	SMARCA5	R.SVC*LIGDKEQR.A	0.89		0.51	0.754237		0.51	2	0.632119	0.172702	0.273211	-0.661733
2	Q9UBF2	COPG2 Coatomer subunit gamma-2	COPG2	R.ELAPAVSVLQLFC*SSPK.P	1.01	0.95	0.18	0.855932	0.863636	0.18	3	0.63319	0.392493	0.619866	-0.659291
1376	O00170	AIP AH receptor-interacting protein	AIP	R.HC*CGVAQMR.E	0.5	0.93		0.423729	0.845455		2	0.634592	0.298205	0.469917	-0.656099
81	O94906	PRPF6 Pre-mRNA-processing factor 6	PRPF6	R.HGELWC*AVSK.D	0.79		0.6	0.669492		0.6	2	0.634746	0.0491379	0.0774136	-0.655749
82	Q12789	GTF3C1 General transcription factor 3C polypeptide 1	GTF3C1	R.VVDGHLNLPVC*K.G	0.79		0.6	0.669492		0.6	2	0.634746	0.0491379	0.0774136	-0.655749
80	Q9UBB4	ATXN10 Ataxin-10	ATXN10	K.ETTNIFSNC*GC*VR.A	0.79		0.6	0.669492		0.6	2	0.634746	0.0491379	0.0774136	-0.655749
227	Q86U70	LDB1 LIM domain-binding protein 1	LDB1	R.C*GLSNSTLNYLR.L	0.67		0.71	0.567797		0.71	2	0.638898	0.100553	0.157385	-0.646342
83	O00410	IPO5 Importin-5	IPO5	R.VQAHAAAALINFTEDC*PK.S	0.8		0.6	0.677966		0.6	2	0.638983	0.0551304	0.0862783	-0.64615
98	O43175	PHGDH D-3-phosphoglycerate dehydrogenase	PHGDH	K.NAGNC*LSPAVIVGLLK.E	0.77	0.71	0.62	0.652542	0.645455	0.62	3	0.639332	0.0171132	0.0267674	-0.645362
38	Q9BSJ8	ESYT1 Extended synaptotagmin-1	ESYT1	R.LGTQTFC*SR.V	0.91		0.51	0.771186		0.51	2	0.640593	0.184687	0.288306	-0.64252
92	Q6P996	PDXDC1 Pyridoxal-dependent decarboxylase domain-containin	PDXDC1	K.HAC*QLSQR.L	0.8		0.61	0.677966		0.61	2	0.643983	0.0480593	0.0746282	-0.634905
175	Q08211	DHX9 ATP-dependent RNA helicase A	DHX9	K.SSVNC*PFSSQDMK.Y	0.76	0.69	0.68	0.644068	0.627273	0.68	3	0.650447	0.0269362	0.0414119	-0.620497
70	Q9Y4P3	TBL2 Transducin beta-like protein 2	TBL2	K.GQVLSTINTNQMNNTHAAVSPC*GR.F	0.84		0.59	0.711864		0.59	2	0.650932	0.0861711	0.132381	-0.619421
137	P27635	RPL10 60S ribosomal protein L10	RPL10	K.SC*GKDGFHIR.V	0.77		0.65	0.652542		0.65	2	0.651271	0.00179773	0.00276034	-0.61867
381	Q6P2E9	EDC4 Enhancer of mRNA-decapping protein 4	EDC4	K.GHSTC*LSEGALSPDGTVLATASHDGYVK.F	0.57		0.82	0.483051		0.82	2	0.651525	0.238259	0.365694	-0.618107
39	Q12962	TAF10 Transcription initiation factor TFIID subunit 10	TAF10	K.FISDIANDALQHC*K.M	0.94		0.51	0.79661		0.51	2	0.653305	0.202664	0.310213	-0.614171
58	Q7Z6Z7	HUWE1 E3 ubiquitin-protein ligase HUWE1	HUWE1	K.LLEVVQPC*LQAAK.E	0.87		0.57	0.737288		0.57	2	0.653644	0.118291	0.180971	-0.613423
116	Q9ULX6	AKAP8L A-kinase anchor protein 8-like	AKAP8L	R.GQC*MSGASR.L	0.8		0.63	0.677966		0.63	2	0.653983	0.0339172	0.0518624	-0.612675
111	O15020	SPTBN2 Spectrin beta chain, non-erythrocytic 2	SPTBN2	R.IHC*LENVDK.A	0.79	0.74	0.63	0.669492	0.672727	0.63	3	0.657406	0.0237896	0.0361871	-0.605143
64	O00410	IPO5 Importin-5	IPO5	R.MAC*GLGGK.L	0.87		0.58	0.737288		0.58	2	0.658644	0.11122	0.168861	-0.602429
124	P24752	ACAT1 Acetyl-CoA acetyltransferase, mitochondrial	ACAT1	K.QGEYGLASIC*NGGGGASAMLIQK.L	0.8		0.64	0.677966		0.64	2	0.658983	0.0268461	0.0407387	-0.601687
123	P30876	POLR2B DNA-directed RNA polymerase II subunit RPB2	POLR2B	R.DC*QIAHGAAQFLR.E	0.8		0.64	0.677966		0.64	2	0.658983	0.0268461	0.0407387	-0.601687
163	Q29RF7	PDS5A Sister chromatid cohesion protein PDS5 homolog A	PDS5A	R.ELLDLHKQPTSEANC*SAMFGK.L	0.77		0.67	0.652542		0.67	2	0.661271	0.0123444	0.0186677	-0.596686
176	Q96FX7	TRMT61A tRNA (adenine(58)-N(1))-methyltransferase catalyti	TRMT61A	R.FCSFSPC*IEQVQR.T	0.74	0.75	0.68	0.627119	0.681818	0.68	3	0.662979	0.0310692	0.0468631	-0.592965
164	Q7Z7H8	MRPL10 39S ribosomal protein L10, mitochondrial	MRPL10	R.TVPFLPLLGGC*IDDTILSR.Q	0.78		0.67	0.661017		0.67	2	0.665508	0.00635198	0.00954455	-0.587471
1303	Q9UGI8	TES Testin	TES	K.YKSEALGVGDVKLPC*EMDAQGPK.Q	1.55	0.02		1.31356	0.0181818		2	0.665871	0.91597	1.3756	-0.586686
199	P09543	CNP 2,3-cyclic-nucleotide 3-phosphodiesterase	CNP	K.TAWRLDC*AQLK.E	0.76		0.69	0.644068		0.69	2	0.667034	0.032479	0.0486916	-0.584168
65	Q9Y2X3	NOP58 Nucleolar protein 58	NOP58	R.EMAAMC*LGLAHSLSR.Y	0.89		0.58	0.754237		0.58	2	0.667119	0.123204	0.184681	-0.583985
1314	Q8TBF2	FAM213B Prostamide/prostaglandin F synthase	FAM213B	R.FGC*VVCR.W	0.97	0.57		0.822034	0.518182		2	0.670108	0.214856	0.320629	-0.577535
66	Q15208	STK38 Serine/threonine-protein kinase 38	STK38	K.LSDFGLC*TGLKK.A	0.7	0.91	0.59	0.59322	0.827273	0.59	3	0.670164	0.136069	0.203039	-0.577413
181	P49189	ALDH9A1 4-trimethylaminobutyraldehyde dehydrogenase	ALDH9A1	K.GALMANFLTQGQVC*CNGTR.V	0.78		0.68	0.661017		0.68	2	0.670508	0.013423	0.0200192	-0.576673
182	Q01813	PFKP ATP-dependent 6-phosphofructokinase, platelet type	PFKP	K.YAYLNVVGMVGSIDNDFC*GTDMTIGTDSALHR.I	0.78		0.68	0.661017		0.68	2	0.670508	0.013423	0.0200192	-0.576673
200	Q06323	PSME1 Proteasome activator complex subunit 1	PSME1	K.KGEDEDKGPPCGPVNC*NEK.I	0.77		0.69	0.652542		0.69	2	0.671271	0.0264865	0.0394573	-0.575032
72	P63010	AP2B1 AP-2 complex subunit beta	AP2B1	K.C*LKDEDPYVR.K	1.03	0.6	0.6	0.872881	0.545455	0.6	3	0.672779	0.175427	0.26075	-0.571796
84	P51398	DAP3 28S ribosomal protein S29, mitochondrial	DAP3	K.TFSEAC*LMVR.K	0.88		0.6	0.745763		0.6	2	0.672881	0.10307	0.153177	-0.571576
216	P38606	ATP6V1A V-type proton ATPase catalytic subunit A	ATP6V1A	R.DIKWDFTPC*K.N	0.77		0.7	0.652542		0.7	2	0.676271	0.0335576	0.0496215	-0.564326
71	Q12906	ILF3 Interleukin enhancer-binding factor 3	ILF3	K.C*LAALASLR.H	0.9		0.59	0.762712		0.59	2	0.676356	0.122126	0.180564	-0.564145
217	Q9NP73	ALG13 Putative bifunctional UDP-N-acetylglucosamine tran	ALG13	K.ADLVISHAGAGSC*LETLEK.G	0.78		0.7	0.661017		0.7	2	0.680508	0.0275652	0.0405067	-0.555315
287	O15533	TAPBP Tapasin	TAPBP	R.GAPAPHC*EMSR.F	0.71		0.76	0.601695		0.76	2	0.680847	0.111939	0.164411	-0.554596
148	O43159	RRP8 Ribosomal RNA-processing protein 8	RRP8	K.AQLSGLQLQPC*LYK.R	0.83		0.66	0.70339		0.66	2	0.681695	0.0306812	0.0450073	-0.552802
31	P30044	PRDX5 Peroxiredoxin-5, mitochondrial	PRDX5	K.GVLFGVPGAFTPGC*SK.T	1.02		0.5	0.864407		0.5	2	0.682203	0.257675	0.377709	-0.551726
263	Q9BUH6	C9orf142 Protein PAXX	C9orf142	R.C*PGESLINPGFK.S	0.74		0.74	0.627119		0.74	2	0.683559	0.0798192	0.11677	-0.548862
210	P10644	PRKAR1A cAMP-dependent protein kinase type I-alpha regulat	PRKAR1A	R.SLREC*ELYVQK.H	0.88	0.67	0.7	0.745763	0.609091	0.7	3	0.684951	0.0695676	0.101566	-0.545927
48	Q92616	GCN1 eIF-2-alpha kinase activator GCN1	GCN1	R.KALC*DPLEEVR.E	0.98		0.54	0.830508		0.54	2	0.685254	0.205421	0.299773	-0.545289
93	P05141	SLC25A5 ADP/ATP translocase 2	SLC25A5	K.GTDIMYTGTLDC*WR.K	0.9		0.61	0.762712		0.61	2	0.686356	0.107984	0.157329	-0.542971
135	Q5JTH9	RRP12 RRP12-like protein	RRP12	K.GC*QAEADRAEVSR.F		0.8	0.65		0.727273	0.65	2	0.688636	0.0546401	0.0793453	-0.538186
45	Q96DF8	DGCR14 Protein DGCR14	DGCR14	R.C*QLQQAAALNAQHK.Q	1		0.53	0.847458		0.53	2	0.688729	0.224476	0.325929	-0.537992
138	Q96QK1	VPS35 Vacuolar protein sorting-associated protein 35	VPS35	R.VMEC*LKK.A	0.86		0.65	0.728814		0.65	2	0.689407	0.0557296	0.080837	-0.536573
235	Q8WUY1	THEM6 Protein THEM6	THEM6	R.LPC*AVLR.A	0.78		0.72	0.661017		0.72	2	0.690508	0.0417073	0.0604009	-0.534269
40	Q9UBB4	ATXN10 Ataxin-10	ATXN10	K.SSHAVELAC*R.D	1.03		0.51	0.872881		0.51	2	0.691441	0.256596	0.371103	-0.532323
149	O60831	PRAF2 PRA1 family protein 2	PRAF2	R.LAAPDPC*DPQR.W	0.86		0.66	0.728814		0.66	2	0.694407	0.0486585	0.0700721	-0.526147
183	Q9Y5B9	SUPT16H FACT complex subunit SPT16	SUPT16H	R.INFYC*PGSALGR.N	0.84		0.68	0.711864		0.68	2	0.695932	0.0225315	0.0323761	-0.522981
125	P46060	RANGAP1 Ran GTPase-activating protein 1	RANGAP1	K.ILAAALTEC*HR.K	0.89		0.64	0.754237		0.64	2	0.697119	0.080778	0.115874	-0.520524
412	P53597	SUCLG1 Succinate--CoA ligase [ADP/GDP-forming] subunit al	SUCLG1	R.LIGPNC*PGVINPGECK.I	0.66		0.84	0.559322		0.84	2	0.699661	0.198469	0.283665	-0.515272
184	Q08211	DHX9 ATP-dependent RNA helicase A	DHX9	K.LQISHEAAAC*ITGLR.A	0.85		0.68	0.720339		0.68	2	0.700169	0.028524	0.0407387	-0.514224
201	O00487	PSMD14 26S proteasome non-ATPase regulatory subunit 14	PSMD14	K.SWMEGLTLQDYSEHC*K.H	0.84		0.69	0.711864		0.69	2	0.700932	0.0154605	0.022057	-0.512653
120	P68363	TUBA1B Tubulin alpha-1B chain	TUBA1B	R.AVC*MLSNTTAIAEAWAR.L	0.89	0.78	0.64	0.754237	0.709091	0.64	3	0.701109	0.0575354	0.0820633	-0.512289
126	P62913	RPL11 60S ribosomal protein L11	RPL11	K.LC*LNICVGESGDR.L	0.9		0.64	0.762712		0.64	2	0.701356	0.0867704	0.123718	-0.511781
378	P49207	RPL34 60S ribosomal protein L34	RPL34	K.SAC*GVCPGR.L	0.66	0.8	0.82	0.559322	0.727273	0.82	3	0.702198	0.132136	0.188174	-0.51005
1322	O76021	RSL1D1 Ribosomal L1 domain-containing protein 1	RSL1D1	K.AVDALLTHC*K.S	0.95	0.66		0.805085	0.6		2	0.702542	0.145017	0.206417	-0.509343
150	P11586	MTHFD1 C-1-tetrahydrofolate synthase, cytoplasmic	MTHFD1	K.QGFGNLPIC*MAK.T	0.88		0.66	0.745763		0.66	2	0.702881	0.0606434	0.0862783	-0.508647
376	Q99873	PRMT1 Protein arginine N-methyltransferase 1	PRMT1	K.VIGIEC*SSISDYAVK.I	0.9	0.58	0.82	0.762712	0.527273	0.82	3	0.703328	0.155136	0.220574	-0.50773
185	P83731	RPL24 60S ribosomal protein L24	RPL24	-.MKVELC*SFSGYK.I	0.86		0.68	0.728814		0.68	2	0.704407	0.0345164	0.0490007	-0.505519
288	Q06265	EXOSC9 Exosome complex component RRP45	EXOSC9	-.MKETPLSNC*ER.R	0.77		0.76	0.652542		0.76	2	0.706271	0.075984	0.107585	-0.501706
382	Q9NZ45	CISD1 CDGSH iron-sulfur domain-containing protein 1	CISD1	K.IVHAFDMEDLGDKAVYC*R.C	0.7		0.82	0.59322		0.82	2	0.70661	0.160357	0.226939	-0.501014
246	P23396	RPS3 40S ribosomal protein S3	RPS3	K.VATRGLC*AIAQAESLR.Y	0.74	0.84	0.73	0.627119	0.763636	0.73	3	0.706918	0.0711256	0.100614	-0.500385
236	O00541	PES1 Pescadillo homolog	PES1	K.AGEGTYALDSESC*MEK.L	0.82		0.72	0.694915		0.72	2	0.707458	0.0177376	0.0250723	-0.499284
237	P55084	HADHB Trifunctional enzyme subunit beta, mitochondrial	HADHB	K.EGGQYGLVAAC*AAGGQGHAMIVEAYPK.-	0.82		0.72	0.694915		0.72	2	0.707458	0.0177376	0.0250723	-0.499284
103	Q00610	CLTC Clathrin heavy chain 1	CLTC	K.RDPHLAC*VAYER.G	0.94		0.62	0.79661		0.62	2	0.708305	0.124882	0.176311	-0.497557
186	Q1KMD3	HNRNPUL2 Heterogeneous nuclear ribonucleoprotein U-like pro	HNRNPUL2	K.SRDLLVQQASQC*LSK.L	0.87		0.68	0.737288		0.68	2	0.708644	0.0405088	0.0571639	-0.496867
145	Q9UBB4	ATXN10 Ataxin-10	ATXN10	R.LIGNLC*YK.N	0.92	0.76	0.66	0.779661	0.690909	0.66	3	0.71019	0.0621169	0.0874651	-0.493723
151	P46060	RANGAP1 Ran GTPase-activating protein 1	RANGAP1	K.LNNC*GMGIGGGK.I	0.9		0.66	0.762712		0.66	2	0.711356	0.0726283	0.102098	-0.491356
152	Q14152	EIF3A Eukaryotic translation initiation factor 3 subunit	EIF3A	K.NIC*QQVNIK.S	0.9		0.66	0.762712		0.66	2	0.711356	0.0726283	0.102098	-0.491356
1329	Q92973	TNPO1 Transportin-1	TNPO1	K.AHFQNFPNGVTDFIKSEC*LNNIGDSSPLIR.A	0.93	0.7		0.788136	0.636364		2	0.71225	0.107319	0.150676	-0.489545
104	P63010	AP2B1 AP-2 complex subunit beta	AP2B1	R.C*VSTLLDLIQTK.V	0.95		0.62	0.805085		0.62	2	0.712542	0.130875	0.183673	-0.488952
1308	Q9NQW6	ANLN Anillin	ANLN	K.NNAFPC*QVNIK.Q	1.35	0.31		1.14407	0.281818		2	0.712943	0.609703	0.855191	-0.488141
178	P36542	ATP5C1 ATP synthase subunit gamma, mitochondrial	ATP5C1	R.GLC*GAIHSSIAK.Q	0.78	0.88	0.68	0.661017	0.8	0.68	3	0.713672	0.0753621	0.105598	-0.486666
218	P62829	RPL23 60S ribosomal protein L23	RPL23	K.EC*ADLWPR.I	0.86		0.7	0.728814		0.7	2	0.714407	0.0203743	0.0285191	-0.485182
20	Q13418	ILK Integrin-linked protein kinase	ILK	K.FSFQC*PGR.M	0.86	1.03	0.48	0.728814	0.936364	0.48	3	0.715059	0.228493	0.319544	-0.483866
54	P78527	PRKDC DNA-dependent protein kinase catalytic subunit	PRKDC	K.LPVLAGC*LK.G	1.03		0.56	0.872881		0.56	2	0.716441	0.221241	0.308805	-0.481081
99	O75533	SF3B1 Splicing factor 3B subunit 1	SF3B1	K.VQENC*IDLVGR.I	0.98	0.77	0.62	0.830508	0.7	0.62	3	0.716836	0.106259	0.148234	-0.480285
159	Q00610	CLTC Clathrin heavy chain 1	CLTC	R.VVGKYC*EK.R	1.04	0.66	0.67	0.881356	0.6	0.67	3	0.717119	0.146477	0.204257	-0.479716
85	Q9NVX2	NLE1 Notchless protein homolog 1	NLE1	R.AHDGVLC*R.T	0.99		0.6	0.838983		0.6	2	0.719492	0.168987	0.234869	-0.47495
211	Q71U36	TUBA1A Tubulin alpha-1A chain	TUBA1A	K.RTIQFVDWC*PTGFK.V	0.99	0.69	0.7	0.838983	0.627273	0.7	3	0.722085	0.107569	0.14897	-0.469759
275	P32322	PYCR1 Pyrroline-5-carboxylate reductase 1, mitochondrial	PYCR1	R.SLLINAVEASC*IR.T	0.82		0.75	0.694915		0.75	2	0.722458	0.0389508	0.0539143	-0.469015
289	O00567	NOP56 Nucleolar protein 56	NOP56	K.IGAAIQEELGYNC*QTGGVIAEILR.G	0.81		0.76	0.686441		0.76	2	0.72322	0.0520143	0.0719204	-0.467493
153	Q9HA64	FN3KRP Ketosamine-3-kinase	FN3KRP	R.ATGHSGGGC*ISQGR.S	0.93		0.66	0.788136		0.66	2	0.724068	0.0906055	0.125134	-0.465803
238	P18074	ERCC2 TFIIH basal transcription factor complex helicase	ERCC2	R.HAAQC*VGR.A	0.86		0.72	0.728814		0.72	2	0.724407	0.00623213	0.00860308	-0.465128
320	Q9BRJ7	NUDT16L1 Tudor-interacting repair regulator protein	NUDT16L1	R.VLGLGLGC*LR.L	0.79		0.78	0.669492		0.78	2	0.724746	0.0781413	0.107819	-0.464453
202	Q9H0L4	CSTF2T Cleavage stimulation factor subunit 2 tau variant	CSTF2T	K.LC*VQNSHQEAR.N	0.9		0.69	0.762712		0.69	2	0.726356	0.0514151	0.0707849	-0.461251
1318	Q9BXB5	OSBPL10 Oxysterol-binding protein-related protein 10	OSBPL10	R.ATSAGSSPSC*SLAGR.G	1.02	0.65		0.864407	0.590909		2	0.727658	0.193392	0.265773	-0.458668
16	P28288	ABCD3 ATP-binding cassette sub-family D member 3	ABCD3	R.SGANVLICGPNGC*GK.S	1.21		0.43	1.02542		0.43	2	0.727712	0.421028	0.578564	-0.458561
90	O00567	NOP56 Nucleolar protein 56	NOP56	R.LVAFC*PFASSQVALENANAVSEGVVHEDLR.L		0.93	0.61		0.845455	0.61	2	0.727727	0.166492	0.228783	-0.45853
187	P78527	PRKDC DNA-dependent protein kinase catalytic subunit	PRKDC	R.APPC*EYKDWLTK.M	0.92		0.68	0.779661		0.68	2	0.729831	0.070471	0.096558	-0.454367
352	O00159	MYO1C Unconventional myosin-Ic	MYO1C	R.NLKETMC*SSK.N	0.78		0.8	0.661017		0.8	2	0.730508	0.0982759	0.134531	-0.453027
196	P62829	RPL23 60S ribosomal protein L23	RPL23	K.FRISLGLPVGAVINC*ADNTGAK.N	0.83	0.88	0.69	0.70339	0.8	0.69	3	0.73113	0.0600178	0.0820891	-0.4518
212	P83731	RPL24 60S ribosomal protein L24	RPL24	K.C*ESAFLSK.R	0.83	0.87	0.7	0.70339	0.790909	0.7	3	0.731433	0.0515357	0.0704586	-0.451202
139	P42677	RPS27 40S ribosomal protein S27	RPS27	R.LVQSPNSYFMDVKC*PGCYK.I	0.96		0.65	0.813559		0.65	2	0.73178	0.115654	0.158045	-0.450519
154	Q9UMY4	SNX12 Sorting nexin-12	SNX12	K.LKESC*VR.R	0.95		0.66	0.805085		0.66	2	0.732542	0.10259	0.140047	-0.449016
248	P27635	RPL10 60S ribosomal protein L10	RPL10	K.MLSC*AGADR.L	0.76	0.91	0.73	0.644068	0.827273	0.73	3	0.73378	0.0916609	0.124916	-0.44658
188	B5ME19	EIF3CL Eukaryotic translation initiation factor 3 subunit	EIF3CL	R.GC*ILTLVER.M	0.93		0.68	0.788136		0.68	2	0.734068	0.0764634	0.104164	-0.446015
353	O75925	PIAS1 E3 SUMO-protein ligase PIAS1	PIAS1	R.VSLLC*PLGK.M	0.79		0.8	0.669492		0.8	2	0.734746	0.0922834	0.125599	-0.444683
283	Q00839	HNRNPU Heterogeneous nuclear ribonucleoprotein U	HNRNPU	R.APQC*LGK.F	0.9	0.75	0.76	0.762712	0.681818	0.76	3	0.734843	0.0459412	0.0625183	-0.444491
44	O00410	IPO5 Importin-5	IPO5	R.VAAAESMPLLLEC*AR.V	0.83	1.07	0.53	0.70339	0.972727	0.53	3	0.735372	0.22309	0.30337	-0.443453
73	Q9BQE3	TUBA1C Tubulin alpha-1C chain	TUBA1C	R.AVC*MLSNTTAVAEAWAR.L	0.92	0.91	0.6	0.779661	0.827273	0.6	3	0.735645	0.11986	0.162931	-0.442919
141	P11055	MYH3 Myosin-3	MYH3	R.C*NGVLEGIR.I	0.98		0.65	0.830508		0.65	2	0.740254	0.127639	0.172426	-0.433907
140	P30044	PRDX5 Peroxiredoxin-5, mitochondrial	PRDX5	K.ALNVEPDGTGLTC*SLAPNIISQL.-	0.98		0.65	0.830508		0.65	2	0.740254	0.127639	0.172426	-0.433907
232	Q13526	PIN1 Peptidyl-prolyl cis-trans isomerase NIMA-interacti	PIN1	K.IKSGEEDFESLASQFSDC*SSAK.A	0.86	0.85	0.72	0.728814	0.772727	0.72	3	0.740514	0.0282438	0.0381408	-0.433402
239	P55060	CSE1L Exportin-2	CSE1L	K.IC*AVGITK.L	0.9		0.72	0.762712		0.72	2	0.741356	0.0302018	0.0407387	-0.431762
165	Q1KMD3	HNRNPUL2 Heterogeneous nuclear ribonucleoprotein U-like pro	HNRNPUL2	R.NFILDQC*NVYNSGQR.R	0.96		0.67	0.813559		0.67	2	0.74178	0.101512	0.136849	-0.430937
264	O14980	XPO1 Exportin-1	XPO1	K.LDINLLDNVVNC*LYHGEGAQQR.M	0.88		0.74	0.745763		0.74	2	0.742881	0.00407485	0.0054852	-0.428796
265	Q86XP3	DDX42 ATP-dependent RNA helicase DDX42	DDX42	K.SEYTQPTPIQC*QGVPVALSGR.D	0.88		0.74	0.745763		0.74	2	0.742881	0.00407485	0.0054852	-0.428796
160	Q5H9R7	PPP6R3 Serine/threonine-protein phosphatase 6 regulatory	PPP6R3	R.HSNASQSLC*EIVR.L	0.96	0.82	0.67	0.813559	0.745455	0.67	3	0.743005	0.071811	0.0966495	-0.428557
535	Q05048	CSTF1 Cleavage stimulation factor subunit 1	CSTF1	K.AHDGAEVC*SAIFSK.N	1.02	0.49	0.92	0.864407	0.445455	0.92	3	0.743287	0.259424	0.349023	-0.428009
155	P17844	DDX5 Probable ATP-dependent RNA helicase DDX5	DDX5	K.STC*IYGGAPK.G	0.98		0.66	0.830508		0.66	2	0.745254	0.120568	0.161781	-0.424195
51	Q9UIA9	XPO7 Exportin-7	XPO7	R.ILENPQSLSDPNNYHEFC*R.L	1.11		0.55	0.940678		0.55	2	0.745339	0.276251	0.370638	-0.424031
142	P55060	CSE1L Exportin-2	CSE1L	K.SQIC*DNAALYAQK.Y	1		0.65	0.847458		0.65	2	0.748729	0.139624	0.186481	-0.417485
156	O00483	NDUFA4 Cytochrome c oxidase subunit NDUFA4	NDUFA4	R.LALFNPDVC*WDR.N	0.99		0.66	0.838983		0.66	2	0.749492	0.12656	0.168861	-0.416016
286	P05141	SLC25A5 ADP/ATP translocase 2	SLC25A5	R.EFRGLGDC*LVK.I	0.73	0.96	0.76	0.618644	0.872727	0.76	3	0.750457	0.12731	0.169643	-0.414158
1354	Q8WUM4	PDCD6IP Programmed cell death 6-interacting protein	PDCD6IP	K.FIQQTYPSGGEEQAQYC*R.A	0.87	0.84		0.737288	0.763636		2	0.750462	0.018631	0.024826	-0.414149
136	P19838	NFKB1 Nuclear factor NF-kappa-B p105 subunit	NFKB1	R.FRYVC*EGPSHGGLPGASSEK.N		0.94	0.65		0.854545	0.65	2	0.752273	0.144635	0.192265	-0.410672
177	P68363	TUBA1B Tubulin alpha-1B chain	TUBA1B	K.RSIQFVDWC*PTGFK.V	0.96	0.84	0.68	0.813559	0.763636	0.68	3	0.752399	0.0674851	0.0896933	-0.410431
366	P53384	NUBP1 Cytosolic Fe-S cluster assembly factor NUBP1	NUBP1	R.GASC*QGCPNQR.L	0.82		0.81	0.694915		0.81	2	0.752458	0.0813772	0.108149	-0.410318
365	P53618	COPB1 Coatomer subunit beta	COPB1	R.C*IYNLLQSSSPAVK.Y	0.82		0.81	0.694915		0.81	2	0.752458	0.0813772	0.108149	-0.410318
240	O75150	RNF40 E3 ubiquitin-protein ligase BRE1B	RNF40	R.LREIQPC*LAESR.A	0.93		0.72	0.788136		0.72	2	0.754068	0.0481791	0.0638923	-0.407234
266	O60502	MGEA5 Protein O-GlcNAcase	MGEA5	R.LSNC*ANR.T	0.91		0.74	0.771186		0.74	2	0.755593	0.0220521	0.0291852	-0.404318
203	P11388	TOP2A DNA topoisomerase 2-alpha	TOP2A	K.LC*NIFSTK.F	0.97		0.69	0.822034		0.69	2	0.756017	0.0933621	0.123492	-0.40351
489	Q14204	DYNC1H1 Cytoplasmic dynein 1 heavy chain 1	DYNC1H1	K.VQYPQSQAC*K.M	0.74		0.89	0.627119		0.89	2	0.758559	0.185885	0.24505	-0.398666
7	P51114	FXR1 Fragile X mental retardation syndrome-related prot	FXR1	R.NEEATKHLEC*TK.Q	1.39		0.34	1.17797		0.34	2	0.758983	0.592532	0.780691	-0.39786
121	P04350	TUBB4A Tubulin beta-4A chain	TUBB4A	K.LTTPTYGDLNHLVSATMSGVTTC*LR.F	0.96	0.91	0.64	0.813559	0.827273	0.64	3	0.760277	0.104389	0.137303	-0.395402
86	Q9HD45	TM9SF3 Transmembrane 9 superfamily member 3	TM9SF3	R.NLSGQPNFPC*R.V	1.09		0.6	0.923729		0.6	2	0.761864	0.228911	0.300461	-0.392394
490	Q9UNN5	FAF1 FAS-associated factor 1	FAF1	R.FLTMC*NR.H	0.75		0.89	0.635593		0.89	2	0.762797	0.179893	0.235833	-0.39063
166	Q9H0W8	SMG9 Protein SMG9	SMG9	R.REDFC*PR.K	1.01		0.67	0.855932		0.67	2	0.762966	0.131474	0.172319	-0.390309
100	Q13155	AIMP2 Aminoacyl tRNA synthase complex-interacting multif	AIMP2	K.FSIQTMC*PIEGEGNIAR.F	1.08	0.83	0.62	0.915254	0.754545	0.62	3	0.763267	0.14782	0.193668	-0.389741
105	P09543	CNP 2,3-cyclic-nucleotide 3-phosphodiesterase	CNP	K.DKPELQFPFLQDEDTVATLLEC*K.T	1.07		0.62	0.90678		0.62	2	0.76339	0.202784	0.265636	-0.389508
260	P49840	GSK3A Glycogen synthase kinase-3 alpha	GSK3A	K.LC*DFGSAK.Q	0.93	0.84	0.74	0.788136	0.763636	0.74	3	0.763924	0.0240691	0.0315072	-0.388499
233	P22695	UQCRC2 Cytochrome b-c1 complex subunit 2, mitochondrial	UQCRC2	R.NALANPLYC*PDYR.I	0.89	0.9	0.72	0.754237	0.818182	0.72	3	0.76414	0.0498343	0.0652163	-0.388092
276	Q8WUM4	PDCD6IP Programmed cell death 6-interacting protein	PDCD6IP	K.LANQAADYFGDAFKQC*QYKDTLPK.E	0.92		0.75	0.779661		0.75	2	0.764831	0.0209735	0.0274224	-0.386788
127	P08865	RPSA 40S ribosomal protein SA	RPSA	R.YVDIAIPC*NNK.G	1.05		0.64	0.889831		0.64	2	0.764915	0.176657	0.23095	-0.386628
247	Q08211	DHX9 ATP-dependent RNA helicase A	DHX9	R.AAEC*NIVVTQPR.R		0.88	0.73		0.8	0.73	2	0.765	0.0494975	0.0647026	-0.386468
1369	O00429	DNM1L Dynamin-1-like protein	DNM1L	R.IC*YIFHETFGR.T	0.84	0.9		0.711864	0.818182		2	0.765023	0.0751778	0.0982686	-0.386425
219	Q00325	SLC25A3 Phosphate carrier protein, mitochondrial	SLC25A3	K.FAC*FER.T	0.98		0.7	0.830508		0.7	2	0.765254	0.0922834	0.120592	-0.385989
241	Q8N1F7	NUP93 Nuclear pore complex protein Nup93	NUP93	K.SSGQSAQLLSHEPGDPPC*LR.R	0.96		0.72	0.813559		0.72	2	0.76678	0.0661564	0.0862783	-0.383116
587	P83881	RPL36A 60S ribosomal protein L36a	RPL36A	K.IVLRLEC*VEPNCR.S	0.68		0.96	0.576271		0.96	2	0.768136	0.271337	0.353241	-0.380567
354	P32322	PYCR1 Pyrroline-5-carboxylate reductase 1, mitochondrial	PYCR1	R.C*MTNTPVVVR.E	0.87		0.8	0.737288		0.8	2	0.768644	0.044344	0.0576912	-0.379612
224	P24752	ACAT1 Acetyl-CoA acetyltransferase, mitochondrial	ACAT1	K.DGLTDVYNKIHMGSC*AENTAK.K	0.94	0.88	0.71	0.79661	0.8	0.71	3	0.76887	0.0510111	0.0663456	-0.379188
179	P04350	TUBB4A Tubulin beta-4A chain	TUBB4A	K.NSSYFVEWIPNNVKTAVC*DIPPRGLK.M	0.98	0.88	0.68	0.830508	0.8	0.68	3	0.770169	0.079565	0.103308	-0.376752
391	P61158	ACTR3 Actin-related protein 3	ACTR3	R.YSYVC*PDLVK.E	0.85	0.84	0.83	0.720339	0.763636	0.83	3	0.771325	0.0552333	0.0716084	-0.374589
284	P35579	MYH9 Myosin-9	MYH9	K.FSKVEDMAELTC*LNEASVLHNLK.E	1.02	0.76	0.76	0.864407	0.690909	0.76	3	0.771772	0.0873458	0.113176	-0.373753
189	Q14974	KPNB1 Importin subunit beta-1	KPNB1	K.NSAKDC*YPAVQK.T	1.02		0.68	0.864407		0.68	2	0.772203	0.130395	0.168861	-0.372947
355	Q99714	HSD17B10 3-hydroxyacyl-CoA dehydrogenase type-2	HSD17B10	K.KLGNNC*VFAPADVTSEK.D	0.88		0.8	0.745763		0.8	2	0.772881	0.0383516	0.0496215	-0.371681
277	Q9UBQ5	EIF3K Eukaryotic translation initiation factor 3 subunit	EIF3K	K.ALTNLPHTDFTLC*K.C	0.94		0.75	0.79661		0.75	2	0.773305	0.0329584	0.0426201	-0.37089
128	O00410	IPO5 Importin-5	IPO5	R.MLVQC*MQDQEHPSIR.T	1.07		0.64	0.90678		0.64	2	0.77339	0.188642	0.243915	-0.370732
113	P42677	RPS27 40S ribosomal protein S27	RPS27	K.ARLTEGC*SFR.R	0.79	1.13	0.63	0.669492	1.02727	0.63	3	0.775588	0.218858	0.282183	-0.366637
321	Q00610	CLTC Clathrin heavy chain 1	CLTC	R.AHIAQLC*EK.A	0.91		0.78	0.771186		0.78	2	0.775593	0.00623213	0.0080353	-0.366628
197	P04350	TUBB4A Tubulin beta-4A chain	TUBB4A	K.NMMAAC*DPR.H	0.98	0.89	0.69	0.830508	0.809091	0.69	3	0.776533	0.0757012	0.0974861	-0.364881
267	Q99439	CNN2 Calponin-2	CNN2	K.DGTILC*TLMNK.L	0.96		0.74	0.813559		0.74	2	0.77678	0.0520143	0.0669615	-0.364423
392	P78417	GSTO1 Glutathione S-transferase omega-1	GSTO1	R.FC*PFAER.T	0.73	0.97	0.83	0.618644	0.881818	0.83	3	0.776821	0.139414	0.179467	-0.364346
112	P10809	HSPD1 60 kDa heat shock protein, mitochondrial	HSPD1	K.C*EFQDAYVLLSEK.K	1.01	0.93	0.63	0.855932	0.845455	0.63	3	0.777129	0.127525	0.164098	-0.363774
455	Q96EK4	THAP11 THAP domain-containing protein 11	THAP11	R.AGVSGC*FSTFQPTTGHR.L	0.82		0.86	0.694915		0.86	2	0.777458	0.116733	0.150147	-0.363164
1396	P24390	KDELR1 ER lumen protein-retaining receptor 1	KDELR1	R.SC*AGISGK.S	0.73	1.03		0.618644	0.936364		2	0.777504	0.224662	0.288952	-0.363078
157	Q9NZ32	ACTR10 Actin-related protein 10	ACTR10	R.IPDWC*SLNNPPLEMMFDVGK.T	1.06		0.66	0.898305		0.66	2	0.779153	0.168507	0.21627	-0.360022
316	P11388	TOP2A DNA topoisomerase 2-alpha	TOP2A	K.VLFTC*FKR.N	0.98	0.8	0.78	0.830508	0.727273	0.78	3	0.77926	0.0516218	0.0662447	-0.359823
397	P27635	RPL10 60S ribosomal protein L10	RPL10	K.RLIPDGC*GVK.Y	0.86		0.83	0.728814		0.83	2	0.779407	0.0715496	0.0918001	-0.359552
396	Q12788	TBL3 Transducin beta-like protein 3	TBL3	K.AIHTAPVATMAFDPTSTLLATGGC*DGAVR.V	0.86		0.83	0.728814		0.83	2	0.779407	0.0715496	0.0918001	-0.359552
268	Q7L5N1	COPS6 COP9 signalosome complex subunit 6	COPS6	K.TC*NTMNQFVNK.F	0.97		0.74	0.822034		0.74	2	0.781017	0.0580067	0.0742708	-0.356574
554	P60604	UBE2G2 Ubiquitin-conjugating enzyme E2 G2	UBE2G2	R.VC*ISILHAPGDDPMGYESSAER.W	0.75		0.93	0.635593		0.93	2	0.782797	0.208177	0.26594	-0.353291
250	Q92888	ARHGEF1 Rho guanine nucleotide exchange factor 1	ARHGEF1	R.FC*AFVQEAESRPR.C	0.85	0.99	0.73	0.720339	0.9	0.73	3	0.783446	0.101054	0.128986	-0.352094
413	P61086	UBE2K Ubiquitin-conjugating enzyme E2 K	UBE2K	K.KIENLC*AMGFDR.N	0.86		0.84	0.728814		0.84	2	0.784407	0.0786207	0.100229	-0.350326
251	Q5T4S7	UBR4 E3 ubiquitin-protein ligase UBR4	UBR4	R.HTAC*NEQQR.T	0.99		0.73	0.838983		0.73	2	0.784492	0.0770627	0.0982326	-0.35017
261	Q92616	GCN1 eIF-2-alpha kinase activator GCN1	GCN1	K.C*LQNPSSDIR.L	0.94	0.9	0.74	0.79661	0.818182	0.74	3	0.784931	0.0403783	0.0514419	-0.349363
522	O75643	SNRNP200 U5 small nuclear ribonucleoprotein 200 kDa helicas	SNRNP200	R.MWQSMC*PLR.Q	0.78		0.91	0.661017		0.91	2	0.785508	0.176058	0.224132	-0.348301
519	P17844	DDX5 Probable ATP-dependent RNA helicase DDX5	DDX5	R.GDGPIC*LVLAPTR.E	1.29	0.39	0.91	1.09322	0.354545	0.91	3	0.785922	0.384651	0.489427	-0.347542
290	O75934	BCAS2 Pre-mRNA-splicing factor SPF27	BCAS2	R.IENLELMSQHGC*NAWK.V	0.96		0.76	0.813559		0.76	2	0.78678	0.0378722	0.0481357	-0.345968
479	P46782	RPS5 40S ribosomal protein S5	RPS5	K.AQC*PIVER.L	0.71	0.97	0.88	0.601695	0.881818	0.88	3	0.787838	0.161207	0.204619	-0.34403
167	P63010	AP2B1 AP-2 complex subunit beta	AP2B1	R.C*AIKVEQSAER.C	1.07		0.67	0.90678		0.67	2	0.78839	0.167429	0.212368	-0.343019
345	P46779	RPL28 60S ribosomal protein L28	RPL28	R.NC*SSFLIK.R	0.84	0.94	0.8	0.711864	0.854545	0.8	3	0.788803	0.0719965	0.0912731	-0.342263
346	P62280	RPS11 40S ribosomal protein S11	RPS11	K.C*PFTGNVSIR.G	0.81	0.97	0.8	0.686441	0.881818	0.8	3	0.78942	0.0981175	0.124291	-0.341136
1361	O75822	EIF3J Eukaryotic translation initiation factor 3 subunit	EIF3J	K.ITNSLTVLC*SEK.Q	0.93	0.87		0.788136	0.790909		2	0.789522	0.00196116	0.00248398	-0.340948
204	P62906	RPL10A 60S ribosomal protein L10a	RPL10A	K.FSVC*VLGDQQHC*DEAK.A	1.05		0.69	0.889831		0.69	2	0.789915	0.141302	0.178882	-0.34023
129	Q9BWC9	CCDC106 Coiled-coil domain-containing protein 106	CCDC106	R.VKDADGVLC*R.Y	1.11		0.64	0.940678		0.64	2	0.790339	0.212611	0.269013	-0.339457
94	Q13501	SQSTM1 Sequestosome-1	SQSTM1	R.FSFC*CSPEPEAEAEAAAGPGPCER.L	1.15		0.61	0.974576		0.61	2	0.792288	0.257794	0.32538	-0.335903
377	P07814	EPRS Bifunctional glutamate/proline--tRNA ligase	EPRS	K.KLGVENC*YFPMFVSQSALEK.E	1.1	0.69	0.82	0.932203	0.627273	0.82	3	0.793159	0.154227	0.194447	-0.334319
390	Q14919	DRAP1 Dr1-associated corepressor	DRAP1	K.KAC*QVTQSR.N	0.95	0.82	0.83	0.805085	0.745455	0.83	3	0.793513	0.0434443	0.0547494	-0.333674
249	P33240	CSTF2 Cleavage stimulation factor subunit 2	CSTF2	K.LC*VQNSPQEAR.N	0.95	0.93	0.73	0.805085	0.845455	0.73	3	0.793513	0.0585907	0.073837	-0.333674
523	Q9HA92	RSAD1 Radical S-adenosyl methionine domain-containing pr	RSAD1	R.THSAC*DALR.T	0.8		0.91	0.677966		0.91	2	0.793983	0.164073	0.206645	-0.33282
356	P62854	RPS26 40S ribosomal protein S26	RPS26	R.CTNC*AR.C	0.93		0.8	0.788136		0.8	2	0.794068	0.0083894	0.0105651	-0.332666
101	P21796	VDAC1 Voltage-dependent anion-selective channel protein	VDAC1	K.YQIDPDAC*FSAK.V	1.04	0.97	0.62	0.881356	0.881818	0.62	3	0.794391	0.151028	0.190117	-0.332078
308	P13639	EEF2 Elongation factor 2	EEF2	R.C*LYASVLTAQPR.L	0.97		0.77	0.822034		0.77	2	0.796017	0.0367935	0.046222	-0.329129
309	Q9Y3E5	PTRH2 Peptidyl-tRNA hydrolase 2, mitochondrial	PTRH2	R.VC*FGMLPK.S	0.97		0.77	0.822034		0.77	2	0.796017	0.0367935	0.046222	-0.329129
502	Q12788	TBL3 Transducin beta-like protein 3	TBL3	R.RDPEAC*EK.L	0.61	1.07	0.9	0.516949	0.972727	0.9	3	0.796559	0.244864	0.307403	-0.328147
414	Q53H96	PYCR3 Pyrroline-5-carboxylate reductase 3	PYCR3	R.SDVC*TPGGTTIYGLHALEQGGLR.A	0.89		0.84	0.754237		0.84	2	0.797119	0.0606434	0.0760783	-0.327134
25	O75367	H2AFY Core histone macro-H2A.1	H2AFY	K.NC*LALADDKK.L	1	1.16	0.49	0.847458	1.05455	0.49	3	0.797334	0.285591	0.358182	-0.326743
339	A0FGR8	ESYT2 Extended synaptotagmin-2	ESYT2	R.AC*DLPAWVHFPDTER.A	0.95		0.79	0.805085		0.79	2	0.797542	0.0106665	0.0133742	-0.326367
588	Q9NVV4	MTPAP Poly(A) RNA polymerase, mitochondrial	MTPAP	R.FSHQASGFQC*DLTTNNR.I	0.75		0.96	0.635593		0.96	2	0.797797	0.22939	0.28753	-0.325907
456	Q9UG63	ABCF2 ATP-binding cassette sub-family F member 2	ABCF2	R.NLSDGQKC*R.V	0.87		0.86	0.737288		0.86	2	0.798644	0.0867704	0.108647	-0.324375
228	Q9H3U1	UNC45A Protein unc-45 homolog A	UNC45A	R.TLVGIC*SEHQSR.T	1.05		0.71	0.889831		0.71	2	0.799915	0.127159	0.158966	-0.322081
106	P26641	EEF1G Elongation factor 1-gamma	EEF1G	R.AVLGEVKLC*EK.M	1.16		0.62	0.983051		0.62	2	0.801525	0.256716	0.320284	-0.31918
403	P04350	TUBB4A Tubulin beta-4A chain	TUBB4A	K.VSDTVVEPYNATLSVHQLVENTDETYC*IDNEALYDICFR.T	0.86	0.92	0.84	0.728814	0.836364	0.84	3	0.801726	0.06317	0.0787925	-0.318819
49	P27797	CALR Calreticulin	CALR	K.HEQNIDC*GGGYVK.L		1.16	0.55		1.05455	0.55	2	0.802273	0.356768	0.444696	-0.317835
457	Q6PJG6	BRAT1 BRCA1-associated ATM activator 1	BRAT1	R.TQAFQVLLQPLAC*VLK.A	0.88		0.86	0.745763		0.86	2	0.802881	0.080778	0.10061	-0.316741
291	O00303	EIF3F Eukaryotic translation initiation factor 3 subunit	EIF3F	K.TC*FSPNR.V	1		0.76	0.847458		0.76	2	0.803729	0.0618419	0.0769437	-0.315219
229	O95104	SCAF4 Splicing factor, arginine/serine-rich 15	SCAF4	K.C*KPEYK.V	1.06		0.71	0.898305		0.71	2	0.804153	0.133152	0.16558	-0.314459
323	Q96H72	SLC39A13 Zinc transporter ZIP13	SLC39A13	R.GTATAC*R.L	0.98		0.78	0.830508		0.78	2	0.805254	0.0357149	0.0443523	-0.312484
322	Q96QR8	PURB Transcriptional activator protein Pur-beta	PURB	K.FGGAFC*R.Y	0.98		0.78	0.830508		0.78	2	0.805254	0.0357149	0.0443523	-0.312484
415	P36578	RPL4 60S ribosomal protein L4	RPL4	R.YAIC*SALAASALPALVMSK.G	0.92		0.84	0.779661		0.84	2	0.809831	0.0426661	0.0526852	-0.304308
393	P50914	RPL14 60S ribosomal protein L14	RPL14	R.ALVDGPC*TQVR.R	0.84	0.98	0.83	0.711864	0.890909	0.83	3	0.810924	0.0910338	0.112259	-0.30236
367	Q06203	PPAT Amidophosphoribosyltransferase	PPAT	K.C*ELENCQPFVVETLHGK.I	0.96		0.81	0.813559		0.81	2	0.81178	0.00251682	0.00310037	-0.30084
41	P54136	RARS Arginine--tRNA ligase, cytoplasmic	RARS	K.IVFVPGC*SIPLTIVK.S	1.32		0.51	1.11864		0.51	2	0.814322	0.430376	0.528509	-0.296329
220	P51610	HCFC1 Host cell factor 1	HCFC1	R.VAGINAC*GR.G	1.1		0.7	0.932203		0.7	2	0.816102	0.164193	0.201191	-0.293179
450	P03897	MT-ND3 NADH-ubiquinone oxidoreductase chain 3	MT-ND3	K.STPYEC*GFDPMSPAR.V		0.85	0.86		0.772727	0.86	2	0.816364	0.0617111	0.0755927	-0.292716
61	Q9BUJ2	HNRNPUL1 Heterogeneous nuclear ribonucleoprotein U-like pro	HNRNPUL1	R.KAIVIC*PTDEDLKDR.T	1.08	1.05	0.58	0.915254	0.954545	0.58	3	0.8166	0.205841	0.252071	-0.292299
416	O14802	POLR3A DNA-directed RNA polymerase III subunit RPC1	POLR3A	R.DHAGSAC*LR.E	0.94		0.84	0.79661		0.84	2	0.818305	0.0306812	0.0374936	-0.289289
506	P62917	RPL8 60S ribosomal protein L8	RPL8	K.AQLNIGNVLPVGTMPEGTIVC*CLEEKPGDR.G	0.87		0.9	0.737288		0.9	2	0.818644	0.115055	0.140543	-0.288692
1357	Q12996	CSTF3 Cleavage stimulation factor subunit 3	CSTF3	R.C*KIPNTVEEAVR.I	1.01	0.86		0.855932	0.781818		2	0.818875	0.0524065	0.0639982	-0.288285
447	Q99497	PARK7 Protein/nucleic acid deglycase DJ-1	PARK7	K.VTVAGLAGKDPVQC*SR.D	1.49	0.37	0.86	1.26271	0.336364	0.86	3	0.819692	0.464488	0.566661	-0.286846
458	P20226	TBP TATA-box-binding protein	TBP	K.MVC*TGAK.S	0.92		0.86	0.779661		0.86	2	0.819831	0.0568082	0.0692927	-0.286602
130	P05023	ATP1A1 Sodium/potassium-transporting ATPase subunit alpha	ATP1A1	R.IAGLC*NR.A	1.18		0.64	1		0.64	2	0.82	0.254558	0.310437	-0.286304
335	Q1KMD3	HNRNPUL2 Heterogeneous nuclear ribonucleoprotein U-like pro	HNRNPUL2	K.ANFSLPEKC*DYMDEVTYGELEKEEAQPIVTK.Y	1.06	0.85	0.79	0.898305	0.772727	0.79	3	0.820344	0.0680663	0.0829729	-0.285699
292	O43143	DHX15 Pre-mRNA-splicing factor ATP-dependent RNA helicas	DHX15	R.GVAC*TQPR.R	1.04		0.76	0.881356		0.76	2	0.820678	0.0858116	0.104562	-0.285112
272	Q68DK7	MSL1 Male-specific lethal 1 homolog	MSL1	R.KSPLGGGGGSGASSQAAC*LK.Q	1.1	0.86	0.75	0.932203	0.781818	0.75	3	0.821341	0.0973192	0.118488	-0.283948
310	Q8NFH5	NUP35 Nucleoporin NUP53	NUP35	K.SVMESSDRC*ALSSPSLAFTPPIK.T	1.03		0.77	0.872881		0.77	2	0.821441	0.0727481	0.0885616	-0.283772
278	Q9H4M9	EHD1 EH domain-containing protein 1	EHD1	R.FMC*AQLPNPVLDSISIIDTPGILSGEK.Q	1.06		0.75	0.898305		0.75	2	0.824153	0.104868	0.127243	-0.279017
6	Q06323	PSME1 Proteasome activator complex subunit 1	PSME1	K.GEDEDKGPPC*GPVNC*NEK.I		1.44	0.34		1.30909	0.34	2	0.824545	0.685251	0.831065	-0.278329
230	Q9NRZ9	HELLS Lymphoid-specific helicase	HELLS	K.C*NGQPVPFQQPK.H	1.11		0.71	0.940678		0.71	2	0.825339	0.163114	0.197633	-0.276941
311	Q13283	G3BP1 Ras GTPase-activating protein-binding protein 1	G3BP1	K.VMSQNFTNC*HTK.I	1.04		0.77	0.881356		0.77	2	0.825678	0.0787405	0.0953647	-0.276349
336	P68363	TUBA1B Tubulin alpha-1B chain	TUBA1B	K.YMAC*CLLYR.G	0.94	0.98	0.79	0.79661	0.890909	0.79	3	0.82584	0.0564485	0.0683529	-0.276066
340	Q9UN86	G3BP2 Ras GTPase-activating protein-binding protein 2	G3BP2	K.VLSLNFSEC*HTK.I	1.02		0.79	0.864407		0.79	2	0.827203	0.0526135	0.0636041	-0.273686
433	Q15019	SEPT2 Septin-2	2020-09-02	R.LTVVDTPGYGDAINC*RDC*FK.T	0.95		0.85	0.805085		0.85	2	0.827542	0.0317599	0.0383786	-0.273095
405	Q86Y56	DNAAF5 Dynein assembly factor 5, axonemal	DNAAF5	R.AC*LQPSQDPQMR.L	0.76	1.1	0.84	0.644068	1	0.84	3	0.828023	0.178268	0.215294	-0.272258
368	Q8TC07	TBC1D15 TBC1 domain family member 15	TBC1D15	R.TLLVNC*QNK.S	1		0.81	0.847458		0.81	2	0.828729	0.0264865	0.0319604	-0.271028
312	P07814	EPRS Bifunctional glutamate/proline--tRNA ligase	EPRS	K.IDMSSNNGC*MRDPTLYR.C	1.05		0.77	0.889831		0.77	2	0.829915	0.084733	0.102098	-0.268964
379	O43747	AP1G1 AP-1 complex subunit gamma-1	AP1G1	R.FTC*TVNR.I	1.08	0.83	0.82	0.915254	0.754545	0.82	3	0.829933	0.0808136	0.0973736	-0.268933
398	P36578	RPL4 60S ribosomal protein L4	RPL4	R.FC*IWTESAFR.K	0.98		0.83	0.830508		0.83	2	0.830254	0.000359546	0.000433055	-0.268375
417	P42166	TMPO Lamina-associated polypeptide 2, isoform alpha	TMPO	K.SGIQPLC*PER.S	0.97		0.84	0.822034		0.84	2	0.831017	0.012704	0.0152872	-0.26705
418	Q9Y285	FARSA Phenylalanine--tRNA ligase alpha subunit	FARSA	K.VNLQMVYDSPLC*R.L	0.97		0.84	0.822034		0.84	2	0.831017	0.012704	0.0152872	-0.26705
213	P05388	RPLP0 60S acidic ribosomal protein P0	RPLP0	R.AGAIAPC*EVTVPAQNTGLGPEK.T	1.1	0.95	0.7	0.932203	0.863636	0.7	3	0.831947	0.119301	0.1434	-0.265437
117	P18858	LIG1 DNA ligase 1	LIG1	K.GLFVAC*R.H	1.22		0.63	1.0339		0.63	2	0.831949	0.285599	0.343289	-0.265433
357	Q14203	DCTN1 Dynactin subunit 1	DCTN1	K.VTFSC*AAGFGQR.H	1.02		0.8	0.864407		0.8	2	0.832203	0.0455425	0.0547252	-0.264992
205	Q14344	GNA13 Guanine nucleotide-binding protein subunit alpha-1	GNA13	K.SKEIDKC*LSR.E	1.15		0.69	0.974576		0.69	2	0.832288	0.201226	0.241774	-0.264845
471	P37268	FDFT1 Squalene synthase	FDFT1	R.TQNLPNC*QLISR.S	0.94		0.87	0.79661		0.87	2	0.833305	0.0518944	0.0622754	-0.263083
293	P37198	NUP62 Nuclear pore glycoprotein p62	NUP62	R.KVEEVTKVC*EGR.R	1.07		0.76	0.90678		0.76	2	0.83339	0.103789	0.124538	-0.262937
341	O96008	TOMM40 Mitochondrial import receptor subunit TOM40 homolo	TOMM40	R.SSERTPGAATASASGAAEDGAC*GCLPNPGTFEECHRK.C	1.04		0.79	0.881356		0.79	2	0.835678	0.0645984	0.0773006	-0.258981
358	O14980	XPO1 Exportin-1	XPO1	K.DLLGLC*EQKR.G	1.03		0.8	0.872881		0.8	2	0.836441	0.0515349	0.0616121	-0.257665
369	Q9Y5L0	TNPO3 Transportin-3	TNPO3	K.GLC*EKPLASAAAK.A	1.02		0.81	0.864407		0.81	2	0.837203	0.0384714	0.0459523	-0.25635
449	P50990	CCT8 T-complex protein 1 subunit theta	CCT8	R.NIQAC*KELAQTTR.T	1.06	0.83	0.86	0.898305	0.754545	0.86	3	0.837617	0.0744477	0.0888804	-0.255638
294	O14981	BTAF1 TATA-binding protein-associated factor 172	BTAF1	R.LNFDRFDIC*R.L	1.08		0.76	0.915254		0.76	2	0.837627	0.109781	0.131062	-0.25562
295	P62753	RPS6 40S ribosomal protein S6	RPS6	R.GC*IVDANLSVLNLVIVK.K	1.08		0.76	0.915254		0.76	2	0.837627	0.109781	0.131062	-0.25562
143	O60763	USO1 General vesicular transport factor p115	USO1	R.GVMGGQSAGPQHTEAETIQKLC*DR.V	1.21		0.65	1.02542		0.65	2	0.837712	0.265465	0.316893	-0.255474
617	P22087	FBL rRNA 2-O-methyltransferase fibrillarin	FBL	K.ANC*IDSTASAEAVFASEVK.K	1	0.76	0.98	0.847458	0.690909	0.98	3	0.839456	0.144711	0.172387	-0.252474
317	Q99714	HSD17B10 3-hydroxyacyl-CoA dehydrogenase type-2	HSD17B10	K.VC*NFLASQVPFPSR.L	0.96	1.02	0.78	0.813559	0.927273	0.78	3	0.840277	0.0771862	0.091858	-0.251062
370	O60264	SMARCA5 SWI/SNF-related matrix-associated actin-dependent	SMARCA5	K.ATNVC*TR.F	1.03		0.81	0.872881		0.81	2	0.841441	0.0444638	0.0528425	-0.249067
371	P78527	PRKDC DNA-dependent protein kinase catalytic subunit	PRKDC	R.VEQLFQVMNGILAQDSAC*SQR.A	1.03		0.81	0.872881		0.81	2	0.841441	0.0444638	0.0528425	-0.249067
563	Q9Y5M8	SRPRB Signal recognition particle receptor subunit beta	SRPRB	K.NTPSFLIAC*NKQDIAMAK.S	0.88		0.94	0.745763		0.94	2	0.842881	0.137347	0.162949	-0.246599
616	P11172	UMPS Uridine 5-monophosphate synthase	UMPS	R.LHSVC*TLSK.M	1.09	0.69	0.98	0.923729	0.627273	0.98	3	0.843667	0.189503	0.224619	-0.245254
501	Q9UHD8	SEPT9 Septin-9	2020-09-09	K.LTVIDTPGFGDHINNENC*WQPIMK.F	0.79	1.06	0.9	0.669492	0.963636	0.9	3	0.844376	0.154761	0.183284	-0.244043
524	Q9NV70	EXOC1 Exocyst complex component 1	EXOC1	R.NFDKC*ISNQIR.Q	0.92		0.91	0.779661		0.91	2	0.844831	0.0921636	0.109091	-0.243266
285	Q9Y2Q3	GSTK1 Glutathione S-transferase kappa 1	GSTK1	K.NQLKETTEAAC*R.Y	1.1	0.93	0.76	0.932203	0.845455	0.76	3	0.845886	0.0861025	0.10179	-0.241465
296	Q9NUL3	STAU2 Double-stranded RNA-binding protein Staufen homolo	STAU2	K.GSSPTPPC*SPVQPSK.Q	1.1		0.76	0.932203		0.76	2	0.846102	0.121766	0.143914	-0.241097
372	Q8TD19	NEK9 Serine/threonine-protein kinase Nek9	NEK9	R.LLTFGC*NK.C	1.05		0.81	0.889831		0.81	2	0.849915	0.0564487	0.0664168	-0.234609
221	P20073	ANXA7 Annexin A7	ANXA7	R.LLVSMC*QGNR.D	1.18		0.7	1		0.7	2	0.85	0.212132	0.249567	-0.234465
297	Q8IY81	FTSJ3 pre-rRNA processing protein FTSJ3	FTSJ3	R.LAC*DFLAR.G	1.11		0.76	0.940678		0.76	2	0.850339	0.127759	0.150244	-0.23389
468	P27635	RPL10 60S ribosomal protein L10	RPL10	R.IC*ANKYMVK.S	0.86	1.05	0.87	0.728814	0.954545	0.87	3	0.85112	0.114044	0.133993	-0.232566
1385	Q00610	CLTC Clathrin heavy chain 1	CLTC	K.QSVELC*KK.D	0.97	0.97		0.822034	0.881818		2	0.851926	0.0422739	0.0496215	-0.2312
1313	P06400	RB1 Retinoblastoma-associated protein	RB1	K.AVGQGC*VEIGSQR.Y	1.41	0.56		1.19492	0.509091		2	0.852003	0.484951	0.569189	-0.231069
252	P49792	RANBP2 E3 SUMO-protein ligase RanBP2	RANBP2	K.VC*ANHVITK.T	1.15		0.73	0.974576		0.73	2	0.852288	0.172942	0.202914	-0.230587
431	P36578	RPL4 60S ribosomal protein L4	RPL4	R.SGQGAFGNMC*R.G	0.92	1.02	0.85	0.779661	0.927273	0.85	3	0.852311	0.073833	0.0866268	-0.230548
451	P16615	ATP2A2 Sarcoplasmic/endoplasmic reticulum calcium ATPase	ATP2A2	R.NYLEPGKEC*VQPATK.S	1.06	0.88	0.86	0.898305	0.8	0.86	3	0.852768	0.0495499	0.0581048	-0.229774
615	Q13769	THOC5 THO complex subunit 5 homolog	THOC5	K.YREC*LSNK.E	1.16	0.66	0.98	0.983051	0.6	0.98	3	0.85435	0.220279	0.257832	-0.2271
318	Q96QK1	VPS35 Vacuolar protein sorting-associated protein 35	VPS35	K.C*FSEENHEPLR.T	1.01	1.02	0.78	0.855932	0.927273	0.78	3	0.854402	0.0736483	0.0861987	-0.227014
306	P10809	HSPD1 60 kDa heat shock protein, mitochondrial	HSPD1	R.AAVEEGIVLGGGC*ALLR.C	0.96	1.08	0.77	0.813559	0.981818	0.77	3	0.855126	0.11186	0.130811	-0.225791
481	P35579	MYH9 Myosin-9	MYH9	R.C*IIPNHEK.K	0.98		0.88	0.830508		0.88	2	0.855254	0.0349958	0.0409186	-0.225575
507	P21912	SDHB Succinate dehydrogenase [ubiquinone] iron-sulfur s	SDHB	R.C*HTIMNCTR.T	0.96		0.9	0.813559		0.9	2	0.85678	0.0611228	0.0713402	-0.223004
482	Q9UMS4	PRPF19 Pre-mRNA-processing factor 19	PRPF19	R.IWSVPNASC*VQVVR.A	0.99		0.88	0.838983		0.88	2	0.859492	0.0290034	0.0337448	-0.218445
324	Q00403	GTF2B Transcription initiation factor IIB	GTF2B	R.FCSNLC*LPK.Q	1.11		0.78	0.940678		0.78	2	0.860339	0.113616	0.13206	-0.217023
419	O15533	TAPBP Tapasin	TAPBP	K.WASGLTPAQNC*PR.A	1.04		0.84	0.881356		0.84	2	0.860678	0.0292431	0.0339768	-0.216455
107	P51659	HSD17B4 Peroxisomal multifunctional enzyme type 2	HSD17B4	K.SNIHC*NTIAPNAGSR.M	1.3		0.62	1.10169		0.62	2	0.860847	0.34061	0.395668	-0.21617
508	Q12769	NUP160 Nuclear pore complex protein Nup160	NUP160	K.RNHDGEC*TAAPTNR.Q	0.97		0.9	0.822034		0.9	2	0.861017	0.0551304	0.0640294	-0.215886
472	Q14318	FKBP8 Peptidyl-prolyl cis-trans isomerase FKBP8	FKBP8	K.C*LNNLAASQLK.L	1.01		0.87	0.855932		0.87	2	0.862966	0.00994743	0.011527	-0.212624
298	Q08945	SSRP1 FACT complex subunit SSRP1	SSRP1	K.FGGQLLSFDIGDQPVFEIPLSNVSQC*TTGK.N	1.14		0.76	0.966102		0.76	2	0.863051	0.145736	0.168861	-0.212483
404	Q99832	CCT7 T-complex protein 1 subunit eta	CCT7	K.EGTDSSQGIPQLVSNISAC*QVIAEAVR.T	1.06	0.94	0.84	0.898305	0.854545	0.84	3	0.864284	0.0303479	0.0351133	-0.210423
421	P23921	RRM1 Ribonucleoside-diphosphate reductase large subunit	RRM1	R.NTAAMVC*SLENRDECLMCGS.-	1.05		0.84	0.889831		0.84	2	0.864915	0.0352355	0.0407387	-0.209369
420	P49368	CCT3 T-complex protein 1 subunit gamma	CCT3	K.AC*TILLR.G	1.05		0.84	0.889831		0.84	2	0.864915	0.0352355	0.0407387	-0.209369
305	O60664	PLIN3 Perilipin-3	PLIN3	R.DIAQQLQATC*TSLGSSIQGLPTNVK.D	1.05	1.03	0.77	0.889831	0.936364	0.77	3	0.865398	0.0858308	0.0991807	-0.208564
434	Q96SK2	TMEM209 Transmembrane protein 209	TMEM209	K.KFQYQLAC*R.S	1.04		0.85	0.881356		0.85	2	0.865678	0.022172	0.0256123	-0.208098
607	P33993	MCM7 DNA replication licensing factor MCM7	MCM7	R.C*SILAAANPAYGR.Y	0.9		0.97	0.762712		0.97	2	0.866356	0.146575	0.169185	-0.206968
842	Q96MF7	NSMCE2 E3 SUMO-protein ligase NSE2	NSMCE2	K.KQC*GLQADR.E	0.7		1.14	0.59322		1.14	2	0.86661	0.386632	0.446142	-0.206545
623	P62979	RPS27A Ubiquitin-40S ribosomal protein S27a	RPS27A	R.EC*PSDEC*GAGVFMASHFDR.H	0.89		0.98	0.754237		0.98	2	0.867119	0.159638	0.184102	-0.205699
473	P49588	AARS Alanine--tRNA ligase, cytoplasmic	AARS	K.C*LSVMEAK.V	1.02		0.87	0.864407		0.87	2	0.867203	0.003955	0.00456064	-0.205558
1345	Q9Y5P6	GMPPB Mannose-1-phosphate guanyltransferase beta	GMPPB	R.LC*SGPGIVGNVLVDPSAR.I	1.19	0.8		1.00847	0.727273		2	0.867874	0.19884	0.229111	-0.204443
642	Q9P2R3	ANKFY1 Rabankyrin-5	ANKFY1	R.GSHTDAPDTATGNC*LLQR.A	0.88		0.99	0.745763		0.99	2	0.867881	0.172702	0.198992	-0.20443
1350	P55060	CSE1L Exportin-2	CSE1L	K.LLTEC*PPMMDTEYTK.L	1.17	0.82		0.991525	0.745455		2	0.86849	0.173998	0.200346	-0.203419
491	Q8N163	CCAR2 Cell cycle and apoptosis regulator protein 2	CCAR2	R.VVTQNIC*QYR.S	1		0.89	0.847458		0.89	2	0.868729	0.030082	0.0346276	-0.203022
325	P49327	FASN Fatty acid synthase	FASN	K.AFDTAGNGYC*R.S	1.13		0.78	0.957627		0.78	2	0.868814	0.125601	0.144567	-0.202881
509	P46013	MKI67 Proliferation marker protein Ki-67	MKI67	R.SQHDILQMIC*SK.R	0.99		0.9	0.838983		0.9	2	0.869492	0.0431455	0.0496215	-0.201756
435	Q5TFE4	NT5DC1 5-nucleotidase domain-containing protein 1	NT5DC1	K.HFLSDTGMAC*R.S	1.05		0.85	0.889831		0.85	2	0.869915	0.0281644	0.0323761	-0.201053
503	P27635	RPL10 60S ribosomal protein L10	RPL10	K.AKVDEFPLC*GHMVSDEYEQLSSEALEAAR.I	0.8	1.14	0.9	0.677966	1.03636	0.9	3	0.871443	0.180897	0.207584	-0.198521
299	P61289	PSME3 Proteasome activator complex subunit 3	PSME3	R.LLIEKC*NTVK.M	1.16		0.76	0.983051		0.76	2	0.871525	0.157721	0.180971	-0.198385
168	Q00610	CLTC Clathrin heavy chain 1	CLTC	R.LAELEEFINGPNNAHIQQVGDRC*YDEK.M	1.27		0.67	1.07627		0.67	2	0.873136	0.287277	0.329018	-0.195722
406	P62266	RPS23 40S ribosomal protein S23	RPS23	K.ITAFVPNDGC*LNFIEENDEVLVAGFGR.K	0.92	1.1	0.84	0.779661	1	0.84	3	0.87322	0.113864	0.130395	-0.195582
573	P49327	FASN Fatty acid synthase	FASN	R.LSIPTYGLQC*TR.A	0.94		0.95	0.79661		0.95	2	0.873305	0.108463	0.124198	-0.195442
971	O14562	UBFD1 Ubiquitin domain-containing protein UBFD1	UBFD1	K.AEENKKEPLC*R.Q	1.22	0.37	1.25	1.0339	0.336364	1.25	3	0.873421	0.477491	0.546691	-0.195251
407	P62906	RPL10A 60S ribosomal protein L10a	RPL10A	K.FSVC*VLGDQQHCDEAK.A	0.93	1.1	0.84	0.788136	1	0.84	3	0.876045	0.110436	0.126062	-0.190923
399	Q9Y2S7	POLDIP2 Polymerase delta-interacting protein 2	POLDIP2	R.DC*PHISQR.S	1.09		0.83	0.923729		0.83	2	0.876864	0.0662763	0.0755833	-0.189574
422	Q12906	ILF3 Interleukin enhancer-binding factor 3	ILF3	R.VLRDLC*TR.V	1.08		0.84	0.915254		0.84	2	0.877627	0.0532128	0.0606326	-0.18832
589	Q9BSD7	NTPCR Cancer-related nucleoside-triphosphatase	NTPCR	R.NADC*SSGPGQR.V	0.94		0.96	0.79661		0.96	2	0.878305	0.115534	0.131542	-0.187206
755	Q9P0L0	VAPA Vesicle-associated membrane protein-associated pro	VAPA	R.KLMEEC*KR.L	0.8		1.08	0.677966		1.08	2	0.878983	0.284281	0.32342	-0.186093
1377	P09496	CLTA Clathrin light chain A	CLTA	R.LC*DFNPK.S	1.08	0.93		0.915254	0.845455		2	0.880354	0.0493558	0.0560636	-0.183844
483	P62701	RPS4X 40S ribosomal protein S4, X isoform	RPS4X	K.YALTGDEVKKIC*MQR.F	1.04		0.88	0.881356		0.88	2	0.880678	0.000958789	0.00108869	-0.183314
423	P12236	SLC25A6 ADP/ATP translocase 3	SLC25A6	R.YFAGNLASGGAAGATSLC*FVYPLDFAR.T	1.09		0.84	0.923729		0.84	2	0.881864	0.0592052	0.0671364	-0.181371
590	Q96EB1	ELP4 Elongator complex protein 4	ELP4	K.ISSTLKVEPC*SLTPGYTK.L	0.95		0.96	0.805085		0.96	2	0.882542	0.109542	0.124121	-0.180263
583	Q9UKX7	NUP50 Nuclear pore complex protein Nup50	NUP50	K.AC*VGNAYHK.Q	1.38	0.57	0.96	1.16949	0.518182	0.96	3	0.882558	0.332489	0.376734	-0.180237
436	Q14566	MCM6 DNA replication licensing factor MCM6	MCM6	R.NPVC*ANR.R	1.08		0.85	0.915254		0.85	2	0.882627	0.0461417	0.0522777	-0.180124
437	Q6P2Q9	PRPF8 Pre-mRNA-processing-splicing factor 8	PRPF8	R.GATVDKTVC*KK.N	1.08		0.85	0.915254		0.85	2	0.882627	0.0461417	0.0522777	-0.180124
484	P10515	DLAT Dihydrolipoyllysine-residue acetyltransferase comp	DLAT	K.NFSAIINPPQAC*ILAIGASEDKLVPADNEK.G	1.05		0.88	0.889831		0.88	2	0.884915	0.00695122	0.00785524	-0.176389
564	Q9UGV2	NDRG3 Protein NDRG3	NDRG3	K.MADC*GGLPQVVQPGK.L	0.98		0.94	0.830508		0.94	2	0.885254	0.0774222	0.0874576	-0.175836
326	Q9NVU0	POLR3E DNA-directed RNA polymerase III subunit RPC5	POLR3E	R.AAGTDSFNGHPPQGC*ASTPVAR.E	1.17		0.78	0.991525		0.78	2	0.885763	0.149571	0.168861	-0.175008
438	Q8TEX9	IPO4 Importin-4	IPO4	R.APAALPALC*DLLASAADPQIR.Q	1.09		0.85	0.923729		0.85	2	0.886864	0.0521341	0.0587848	-0.173215
540	P35606	COPB2 Coatomer subunit beta	COPB2	K.DMGSC*EIYPQTIQHNPNGR.F	1.01		0.92	0.855932		0.92	2	0.887966	0.0453028	0.0510186	-0.171423
222	Q9H0A0	NAT10 RNA cytidine acetyltransferase	NAT10	R.FILSLASC*K.K	1.27		0.7	1.07627		0.7	2	0.888136	0.266064	0.299576	-0.171148
655	P53618	COPB1 Coatomer subunit beta	COPB1	K.KPITDDDVDRISLC*LK.V	0.92		1	0.779661		1	2	0.889831	0.155803	0.175093	-0.168398
347	P68363	TUBA1B Tubulin alpha-1B chain	TUBA1B	K.AYHEQLSVAEITNAC*FEPANQMVK.C	1.06	1.07	0.8	0.898305	0.972727	0.8	3	0.890344	0.0866384	0.0973089	-0.167565
1358	O00410	IPO5 Importin-5	IPO5	K.HEDPC*AK.R	1.18	0.86		1	0.781818		2	0.890909	0.154278	0.173169	-0.16665
394	Q9P2X0	DPM3 Dolichol-phosphate mannosyltransferase subunit 3	DPM3	R.VATFHDC*EDAAR.E	1.05	1.05	0.83	0.889831	0.954545	0.83	3	0.891459	0.0622887	0.0698728	-0.16576
373	O00410	IPO5 Importin-5	IPO5	K.STAC*QMLVCYAK.E	1.15		0.81	0.974576		0.81	2	0.892288	0.116373	0.130421	-0.164418
485	P62316	SNRPD2 Small nuclear ribonucleoprotein Sm D2	SNRPD2	K.NNTQVLINC*R.N	1.07		0.88	0.90678		0.88	2	0.89339	0.0189361	0.0211958	-0.162638
214	P55060	CSE1L Exportin-2	CSE1L	K.LSTAC*PGR.V	0.89	1.35	0.7	0.754237	1.22727	0.7	3	0.893837	0.290035	0.324483	-0.161917
478	P35998	PSMC2 26S proteasome regulatory subunit 7	PSMC2	R.LC*PNSTGAEIR.S	1.11	0.95	0.88	0.940678	0.863636	0.88	3	0.894771	0.0405894	0.0453629	-0.160409
510	Q13155	AIMP2 Aminoacyl tRNA synthase complex-interacting multif	AIMP2	R.VELPTC*MYR.L	1.05		0.9	0.889831		0.9	2	0.894915	0.00719092	0.0080353	-0.160177
525	P43034	PAFAH1B1 Platelet-activating factor acetylhydrolase IB subu	PAFAH1B1	R.MVRPNQDGTLIASC*SNDQTVR.V	1.04		0.91	0.881356		0.91	2	0.895678	0.0202544	0.0226135	-0.158948
756	P34932	HSPA4 Heat shock 70 kDa protein 4	HSPA4	R.GC*ALQCAILSPAFK.V	0.84		1.08	0.711864		1.08	2	0.895932	0.260311	0.290548	-0.158539
279	P42695	NCAPD3 Condensin-2 complex subunit D3	NCAPD3	R.NKDTPAC*SR.R	1.23		0.75	1.04237		0.75	2	0.896186	0.206739	0.230687	-0.158129
486	P22102	GART Trifunctional purine biosynthetic protein adenosin	GART	R.SAGVQC*FGPTAEAAQLESSKR.F	1.08		0.88	0.915254		0.88	2	0.897627	0.0249285	0.0277716	-0.155812
95	Q69YL0	NCBP2-AS2 Uncharacterized protein NCBP2-AS2	NCBP2-AS2	R.LQDLAAGPVGSLC*R.R	1.4		0.61	1.18644		0.61	2	0.89822	0.407605	0.453792	-0.154859
253	Q96RN5	MED15 Mediator of RNA polymerase II transcription subuni	MED15	K.QQYLC*QPLLDAVLANIR.S	1.26		0.73	1.0678		0.73	2	0.898898	0.238858	0.265723	-0.15377
348	Q15233	NONO Non-POU domain-containing octamer-binding protein	NONO	R.C*SEGSFLLTTFPRPVTVEPMDQLDDEEGLPEK.L	1.07	1.09	0.8	0.90678	0.990909	0.8	3	0.89923	0.0956782	0.1064	-0.153239
526	Q13425	SNTB2 Beta-2-syntrophin	SNTB2	R.LVHSGSGC*R.S	1.05		0.91	0.889831		0.91	2	0.899915	0.014262	0.0158481	-0.152139
359	P36578	RPL4 60S ribosomal protein L4	RPL4	R.GPC*IIYNEDNGIIK.A	1.18		0.8	1		0.8	2	0.9	0.141421	0.157135	-0.152003
360	Q01518	CAP1 Adenylyl cyclase-associated protein 1	CAP1	K.TDGC*HAYLSK.N	1.18		0.8	1		0.8	2	0.9	0.141421	0.157135	-0.152003
536	P63244	RACK1 Receptor of activated protein C kinase 1	RACK1	R.FSPNSSNPIIVSC*GWDK.L	0.97	1.06	0.92	0.822034	0.963636	0.92	3	0.90189	0.0725175	0.0804062	-0.148976
864	P62879	GNB2 Guanine nucleotide-binding protein G(I)/G(S)/G(T)	GNB2	R.LLLAGYDDFNC*NIWDAMKGDR.A	0.76		1.16	0.644068		1.16	2	0.902034	0.364819	0.404441	-0.148746
492	O75643	SNRNP200 U5 small nuclear ribonucleoprotein 200 kDa helicas	SNRNP200	K.TNVALMC*MLR.E	1.08		0.89	0.915254		0.89	2	0.902627	0.0178574	0.0197839	-0.147798
380	P04843	RPN1 Dolichyl-diphosphooligosaccharide--protein glycosy	RPN1	K.VAC*ITEQVLTLVNK.R	1.05	1.1	0.82	0.889831	1	0.82	3	0.903277	0.0907502	0.100468	-0.14676
342	Q68EM7	ARHGAP17 Rho GTPase-activating protein 17	ARHGAP17	R.LVAC*FQGQHGTDAERR.H	1.2		0.79	1.01695		0.79	2	0.903475	0.160477	0.177622	-0.146444
424	O75934	BCAS2 Pre-mRNA-splicing factor SPF27	BCAS2	K.NDITAWQEC*VNNSMAQLEHQAVR.I	1.15		0.84	0.974576		0.84	2	0.907288	0.0951598	0.104884	-0.140367
118	P14635	CCNB1 G2/mitotic-specific cyclin-B1	CCNB1	R.FMQNNC*VPKK.M	1.4		0.63	1.18644		0.63	2	0.90822	0.393463	0.433224	-0.138886
459	P22102	GART Trifunctional purine biosynthetic protein adenosin	GART	K.VLEFNC*R.F	1.13		0.86	0.957627		0.86	2	0.908814	0.0690328	0.0759593	-0.137944
690	Q5MNZ6	WDR45B WD repeat domain phosphoinositide-interacting prot	WDR45B	R.C*NYLALVGGGK.K	0.93		1.03	0.788136		1.03	2	0.909068	0.171024	0.188131	-0.13754
541	P55265	ADAR Double-stranded RNA-specific adenosine deaminase	ADAR	K.LGNSC*EFR.L	1.06		0.92	0.898305		0.92	2	0.909153	0.0153406	0.0168735	-0.137406
542	Q9UBS0	RPS6KB2 Ribosomal protein S6 kinase beta-2	RPS6KB2	R.VDPPFRPC*LQSEEDVSQFDTR.F	1.06		0.92	0.898305		0.92	2	0.909153	0.0153406	0.0168735	-0.137406
570	P42167	TMPO Lamina-associated polypeptide 2, isoforms beta/gam	TMPO	K.EMFPYEASTPTGISASC*R.R	0.9	1.12	0.95	0.762712	1.01818	0.95	3	0.910298	0.132282	0.145317	-0.135589
569	P60468	SEC61B Protein transport protein Sec61 subunit beta	SEC61B	K.NASC*GTR.S	1.02	1.01	0.95	0.864407	0.918182	0.95	3	0.910863	0.0432634	0.0474972	-0.134694
591	O76039	CDKL5 Cyclin-dependent kinase-like 5	CDKL5	K.LC*DFGFAR.N	1.02		0.96	0.864407		0.96	2	0.912203	0.0675946	0.0741004	-0.132573
669	P53618	COPB1 Coatomer subunit beta	COPB1	R.TLHSC*SVR.F	1.04	0.92	1.02	0.881356	0.836364	1.02	3	0.912573	0.0957155	0.104885	-0.131988
787	P12268	IMPDH2 Inosine-5-monophosphate dehydrogenase 2	IMPDH2	R.HGFC*GIPITDTGR.M	0.71	1.14	1.1	0.601695	1.03636	1.1	3	0.912686	0.271199	0.297144	-0.131809
574	Q9BVP2	GNL3 Guanine nucleotide-binding protein-like 3	GNL3	K.KLYC*QELK.K	1.04		0.95	0.881356		0.95	2	0.915678	0.0485387	0.0530085	-0.127088
425	P55060	CSE1L Exportin-2	CSE1L	K.NLFEDQNTLTSIC*EK.V	1.17		0.84	0.991525		0.84	2	0.915763	0.107145	0.117	-0.126954
408	P23921	RRM1 Ribonucleoside-diphosphate reductase large subunit	RRM1	R.NTAAMVCSLENRDEC*LMCGS.-	1.09	1.1	0.84	0.923729	1	0.84	3	0.921243	0.080029	0.0868706	-0.118346
337	P62244	RPS15A 40S ribosomal protein S15a	RPS15A	K.C*GVISPR.F	1.12	1.13	0.79	0.949153	1.02727	0.79	3	0.922142	0.120921	0.13113	-0.11694
474	P50995	ANXA11 Annexin A11	ANXA11	K.FNAVLC*SR.S	1.15		0.87	0.974576		0.87	2	0.922288	0.0739466	0.0801773	-0.116711
790	O43865	AHCYL1 S-adenosylhomocysteine hydrolase-like protein 1	AHCYL1	K.QKFDNLYC*CR.E	0.88		1.1	0.745763		1.1	2	0.922881	0.250484	0.271415	-0.115783
560	Q9UKM9	RALY RNA-binding protein Raly	RALY	R.VAGC*SVHK.G		1	0.94		0.909091	0.94	2	0.924545	0.021856	0.0236398	-0.113184
592	P13010	XRCC5 X-ray repair cross-complementing protein 5	XRCC5	K.CFSVLGFC*K.S	1.05		0.96	0.889831		0.96	2	0.924915	0.0496173	0.0536453	-0.112607
593	Q15024	EXOSC7 Exosome complex component RRP42	EXOSC7	K.GVVTC*MR.K	1.05		0.96	0.889831		0.96	2	0.924915	0.0496173	0.0536453	-0.112607
757	Q9Y5M8	SRPRB Signal recognition particle receptor subunit beta	SRPRB	R.AVLLVGLC*DSGK.T	0.91		1.08	0.771186		1.08	2	0.925593	0.218364	0.235918	-0.11155
608	Q00839	HNRNPU Heterogeneous nuclear ribonucleoprotein U	HNRNPU	K.GKVC*FEMK.V	1.04		0.97	0.881356		0.97	2	0.925678	0.0626808	0.0677134	-0.111418
691	Q8TDX7	NEK7 Serine/threonine-protein kinase Nek7	NEK7	K.KIEQC*DYPPLPSDHYSEELR.Q	0.97		1.03	0.822034		1.03	2	0.926017	0.147054	0.158803	-0.110889
692	Q9Y4R8	TELO2 Telomere length regulation protein TEL2 homolog	TELO2	R.TPQPGSPSPNTPC*LPEAAVSQPGSAVASDWR.V	0.97		1.03	0.822034		1.03	2	0.926017	0.147054	0.158803	-0.110889
475	P08238	HSP90AB1 Heat shock protein HSP 90-beta	HSP90AB1	R.LVSSPC*CIVTSTYGWTANMER.I	1.16		0.87	0.983051		0.87	2	0.926525	0.079939	0.0862783	-0.110098
575	Q86W42	THOC6 THO complex subunit 6 homolog	THOC6	K.VLTAAGNSC*R.V	1.07		0.95	0.90678		0.95	2	0.92839	0.0305614	0.0329187	-0.107197
565	P07814	EPRS Bifunctional glutamate/proline--tRNA ligase	EPRS	K.LNQWC*NVVR.W	1.09		0.94	0.923729		0.94	2	0.931864	0.0115055	0.0123467	-0.101808
650	Q9BWD1	ACAT2 Acetyl-CoA acetyltransferase, cytosolic	ACAT2	R.ATVAPEDVSEVIFGHVLAAGC*GQNPVR.Q	1	1.05	1	0.847458	0.954545	1	3	0.934001	0.0783189	0.0838531	-0.098504
511	Q01581	HMGCS1 Hydroxymethylglutaryl-CoA synthase, cytoplasmic	HMGCS1	K.LSIQC*YLSALDR.C	1.15		0.9	0.974576		0.9	2	0.937288	0.0527334	0.0562617	-0.0934355
469	B0I1T2	MYO1G Unconventional myosin-Ig	MYO1G	R.C*IKPNEDK.V		1.11	0.87		1.00909	0.87	2	0.939545	0.0983521	0.104681	-0.0899651
643	Q9UJX3	ANAPC7 Anaphase-promoting complex subunit 7	ANAPC7	R.NALANQSDC*VLHR.I	1.05		0.99	0.889831		0.99	2	0.939915	0.0708305	0.0753584	-0.0893974
850	O95299	NDUFA10 NADH dehydrogenase [ubiquinone] 1 alpha subcomplex	NDUFA10	R.KQC*VDHYNEVK.S	1.22	0.7	1.15	1.0339	0.636364	1.15	3	0.940087	0.269362	0.286529	-0.0891333
543	Q14690	PDCD11 Protein RRP5 homolog	PDCD11	R.ALEC*LPSKEHVDVIAK.F	1.14		0.92	0.966102		0.92	2	0.943051	0.0325988	0.0345674	-0.0845925
476	P43686	PSMC4 26S proteasome regulatory subunit 6B	PSMC4	K.ISGADINSIC*QESGMLAVR.E	1.2		0.87	1.01695		0.87	2	0.943475	0.103909	0.110134	-0.0839445
1433	P83881	RPL36A 60S ribosomal protein L36a	RPL36A	R.C*KHFELGGDK.K	0.94	1.2		0.79661	1.09091		2	0.94376	0.208101	0.220502	-0.0835086
280	P20073	ANXA7 Annexin A7	ANXA7	R.C*YQSEFGR.D	1.35		0.75	1.14407		0.75	2	0.947034	0.278648	0.294232	-0.078512
493	P55263	ADK Adenosine kinase	ADK	R.TGC*TFPEKPDFH.-	1.19		0.89	1.00847		0.89	2	0.949237	0.0837742	0.0882542	-0.0751593
307	Q9BQE3	TUBA1C Tubulin alpha-1C chain	TUBA1C	K.AYHEQLTVAEITNAC*FEPANQMVK.C	1.06	1.3	0.77	0.898305	1.18182	0.77	3	0.950041	0.210727	0.221809	-0.0739382
59	P06400	RB1 Retinoblastoma-associated protein	RB1	R.LNTLC*ER.L	1.57		0.57	1.33051		0.57	2	0.950254	0.537761	0.565912	-0.0736145
527	P49368	CCT3 T-complex protein 1 subunit gamma	CCT3	K.HTQENC*ETWGVNGETGTLVDMK.E	1.17		0.91	0.991525		0.91	2	0.950763	0.0576472	0.0606326	-0.0728428
460	Q15005	SPCS2 Signal peptidase complex subunit 2	SPCS2	R.SGGSGGC*SGAGGASNC*GTGSGR.S	1.23		0.86	1.04237		0.86	2	0.951186	0.128957	0.135575	-0.0721999
693	Q9BVP2	GNL3 Guanine nucleotide-binding protein-like 3	GNL3	R.C*PQVEEAIVQSGQK.K	1.03		1.03	0.872881		1.03	2	0.951441	0.1111	0.11677	-0.0718144
775	Q9NR30	DDX21 Nucleolar RNA helicase 2	DDX21	K.GKLGVC*FDVPTASVTEIQEK.W	0.96		1.09	0.813559		1.09	2	0.95178	0.195473	0.205376	-0.0713005
624	Q96HW7	INTS4 Integrator complex subunit 4	INTS4	K.TAGFSPDC*IMDDAINILQNEK.S	1.09		0.98	0.923729		0.98	2	0.951864	0.0397897	0.0418019	-0.071172
400	P50213	IDH3A Isocitrate dehydrogenase [NAD] subunit alpha, mito	IDH3A	K.TFDLYANVRPC*VSIEGYK.T	1.27		0.83	1.07627		0.83	2	0.953136	0.17414	0.182702	-0.0692466
1311	P08237	PFKM ATP-dependent 6-phosphofructokinase, muscle type	PFKM	R.LPLMEC*VQVTK.D	1.8	0.42		1.52542	0.381818		2	0.953621	0.808651	0.84798	-0.0685122
1007	Q86Y37	CACUL1 CDK2-associated and cullin domain-containing prote	CACUL1	K.SC*DAAAAVAK.A	0.73		1.29	0.618644		1.29	2	0.954322	0.47472	0.497442	-0.0674519
618	P49411	TUFM Elongation factor Tu, mitochondrial	TUFM	R.ELLTEFGYKGEETPVIVGSALC*ALEGR.D	1.15	1	0.98	0.974576	0.909091	0.98	3	0.954556	0.039467	0.0413459	-0.0670987
467	Q15365	PCBP1 Poly(rC)-binding protein 1	PCBP1	R.LVVPATQC*GSLIGK.G	1.25	1.03	0.87	1.05932	0.936364	0.87	3	0.955229	0.0960605	0.100563	-0.0660821
758	Q9BVP2	GNL3 Guanine nucleotide-binding protein-like 3	GNL3	K.NAAPFRSEVC*FGK.E	0.98		1.08	0.830508		1.08	2	0.955254	0.176417	0.184681	-0.0660433
854	Q96T76	MMS19 MMS19 nucleotide excision repair protein homolog	MMS19	R.YHPLSSC*LTAR.L	0.9		1.15	0.762712		1.15	2	0.956356	0.273854	0.286352	-0.0643804
131	P04075	ALDOA Fructose-bisphosphate aldolase A	ALDOA	R.ALANSLAC*QGK.Y	1.51		0.64	1.27966		0.64	2	0.959831	0.452309	0.471238	-0.0591484
537	P13796	LCP1 Plastin-2	LCP1	K.EGIC*AIGGTSEQSSVGTQHSYSEEEK.Y		1.1	0.92		1	0.92	2	0.96	0.0565685	0.0589256	-0.0588937
625	Q6P2Q9	PRPF8 Pre-mRNA-processing-splicing factor 8	PRPF8	K.FIC*ISDLR.A	1.11		0.98	0.940678		0.98	2	0.960339	0.0278049	0.0289532	-0.0583844
555	P49368	CCT3 T-complex protein 1 subunit gamma	CCT3	K.IPGGIIEDSC*VLR.G	1.17		0.93	0.991525		0.93	2	0.960763	0.043505	0.0452818	-0.0577479
805	P62333	PSMC6 26S proteasome regulatory subunit 10B	PSMC6	K.GC*LLYGPPGTGK.T	0.96		1.11	0.813559		1.11	2	0.96178	0.209615	0.217945	-0.0562217
604	Q06323	PSME1 Proteasome activator complex subunit 1	PSME1	K.VDVFREDLC*TK.T	1.21	0.98	0.97	1.02542	0.890909	0.97	3	0.962111	0.0676034	0.0702657	-0.0557248
426	Q9Y5Y2	NUBP2 Cytosolic Fe-S cluster assembly factor NUBP2	NUBP2	K.VGILDVDLC*GPSIPR.M	1.28		0.84	1.08475		0.84	2	0.962373	0.173061	0.179828	-0.0553321
512	Q9NZL9	MAT2B Methionine adenosyltransferase 2 subunit beta	MAT2B	K.EFQQNNWHAVGC*GFR.R	1.21		0.9	1.02542		0.9	2	0.962712	0.088688	0.0921231	-0.054824
528	Q7RTV0	PHF5A PHD finger-like domain-containing protein 5A	PHF5A	R.ICDEC*NYGSYQGR.C	1.2		0.91	1.01695		0.91	2	0.963475	0.0756245	0.0784914	-0.0536815
814	P00558	PGK1 Phosphoglycerate kinase 1	PGK1	R.GCITIIGGGDTATC*CAK.W		0.89	1.12		0.809091	1.12	2	0.964545	0.219846	0.227927	-0.0520789
644	Q9NX24	NHP2 H/ACA ribonucleoprotein complex subunit 2	NHP2	K.ADPDGPEAQAEAC*SGER.T	1.11		0.99	0.940678		0.99	2	0.965339	0.0348759	0.0361282	-0.0508925
991	P50452	SERPINB8 Serpin B8	SERPINB8	K.TNC*ILFCGR.F	0.78		1.27	0.661017		1.27	2	0.965508	0.430616	0.445999	-0.0506392
349	P46109	CRKL Crk-like protein	CRKL	K.RVPC*AYDK.T	1.23	1.16	0.8	1.04237	1.05455	0.8	3	0.965639	0.143577	0.148686	-0.0504435
1191	Q15233	NONO Non-POU domain-containing octamer-binding protein	NONO	R.FAC*HSASLTVR.N	0.75	0.75	1.58	0.635593	0.681818	1.58	3	0.965804	0.532411	0.551262	-0.050198
594	O00571	DDX3X ATP-dependent RNA helicase DDX3X	DDX3X	K.IGLDFC*K.Y	1.15		0.96	0.974576		0.96	2	0.967288	0.010307	0.0106555	-0.0479824
1427	P54646	PRKAA2 5-AMP-activated protein kinase catalytic subunit	PRKAA2	R.TSC*GSPNYAAPEVISGR.L	1.03	1.17		0.872881	1.06364		2	0.968259	0.134884	0.139306	-0.0465353
839	P62888	RPL30 60S ribosomal protein L30	RPL30	R.VC*TLAIIDPGDSDIIR.S	1	1.01	1.14	0.847458	0.918182	1.14	3	0.968546	0.152636	0.157593	-0.0461068
1378	Q9Y678	COPG1 Coatomer subunit gamma-1	COPG1	K.HPSAVTAC*NLDLENLVTDSNR.S	1.29	0.93		1.09322	0.845455		2	0.969337	0.175197	0.180739	-0.0449291
603	P50990	CCT8 T-complex protein 1 subunit theta	CCT8	K.IAVYSC*PFDGMITETK.G	1.26	0.96	0.97	1.0678	0.872727	0.97	3	0.970175	0.0975348	0.100533	-0.0436836
638	P62701	RPS4X 40S ribosomal protein S4, X isoform	RPS4X	R.EC*LPLIIFLR.N	1.11	1.08	0.99	0.940678	0.981818	0.99	3	0.970832	0.0264327	0.0272268	-0.0427064
1150	P15153	RAC2 Ras-related C3 botulinum toxin substrate 2	RAC2	R.AVLC*PQPTR.Q	0.56		1.47	0.474576		1.47	2	0.972288	0.703871	0.723932	-0.0405442
544	Q14683	SMC1A Structural maintenance of chromosomes protein 1A	SMC1A	R.NSSAQAFLGPENPEEPYLDGINYNC*VAPGKR.F	1.21		0.92	1.02542		0.92	2	0.972712	0.0745458	0.0766371	-0.0399156
627	P33993	MCM7 DNA replication licensing factor MCM7	MCM7	R.YIAMC*R.E	1.14		0.98	0.966102		0.98	2	0.973051	0.00982759	0.0100998	-0.0394129
626	Q9NQ88	TIGAR Fructose-2,6-bisphosphatase TIGAR	TIGAR	K.EADQKEQFSQGSPSNC*LETSLAEIFPLGK.N	1.14		0.98	0.966102		0.98	2	0.973051	0.00982759	0.0100998	-0.0394129
670	P61978	HNRNPK Heterogeneous nuclear ribonucleoprotein K	HNRNPK	K.LFQEC*CPHSTDR.V	1.18	0.99	1.02	1	0.9	1.02	3	0.973333	0.064291	0.0660524	-0.0389941
722	Q9ULA0	DNPEP Aspartyl aminopeptidase	DNPEP	R.VIVKC*PTSGR.L	1.03	1.1	1.05	0.872881	1	1.05	3	0.974294	0.0913146	0.0937239	-0.0375712
470	P22102	GART Trifunctional purine biosynthetic protein adenosin	GART	R.FGDPEC*QVILPLLK.S	1.19	1.15	0.87	1.00847	1.04545	0.87	3	0.974643	0.0924906	0.0948969	-0.0370542
395	P08238	HSP90AB1 Heat shock protein HSP 90-beta	HSP90AB1	R.GFEVVYMTEPIDEYC*VQQLK.E	1.27	1.12	0.83	1.07627	1.01818	0.83	3	0.974818	0.128735	0.132061	-0.0367957
739	P63244	RACK1 Receptor of activated protein C kinase 1	RACK1	K.LWNTLGVC*K.Y	1.05		1.06	0.889831		1.06	2	0.974915	0.120328	0.123424	-0.0366513
720	O75663	TIPRL TIP41-like protein	TIPRL	K.VAC*AEEWQESR.T		0.99	1.05		0.9	1.05	2	0.975	0.106066	0.108786	-0.0365259
1389	P35579	MYH9 Myosin-9	MYH9	R.EDQSILC*TGESGAGK.T	1.25	0.98		1.05932	0.890909		2	0.975116	0.119086	0.122125	-0.0363549
908	P13639	EEF2 Elongation factor 2	EEF2	R.LMEPIYLVEIQC*PEQVVGGIYGVLNR.K	0.9		1.19	0.762712		1.19	2	0.976356	0.302138	0.309455	-0.0345209
545	O95373	IPO7 Importin-7	IPO7	R.GIDQC*IPLFVEAALER.L	1.22		0.92	1.0339		0.92	2	0.976949	0.0805383	0.0824385	-0.0336446
645	Q7Z3J2	C16orf62 UPF0505 protein C16orf62	C16orf62	R.HGC*ADTR.T	1.14		0.99	0.966102		0.99	2	0.978051	0.0168987	0.0172779	-0.0320186
1413	P51610	HCFC1 Host cell factor 1	HCFC1	R.AGHC*AVAINTR.L	1.14	1.09		0.966102	0.990909		2	0.978505	0.0175415	0.0179268	-0.0313483
319	Q9HAV7	GRPEL1 GrpE protein homolog 1, mitochondrial	GRPEL1	K.ATQC*VPKEEIKDDNPHLK.N	1.15	1.3	0.78	0.974576	1.18182	0.78	3	0.978798	0.200942	0.205295	-0.0309167
327	Q14318	FKBP8 Peptidyl-prolyl cis-trans isomerase FKBP8	FKBP8	K.REC*GNAHYQR.A	1.39		0.78	1.17797		0.78	2	0.978983	0.281405	0.287446	-0.0306442
504	Q15365	PCBP1 Poly(rC)-binding protein 1	PCBP1	R.VMTIPYQPMPASSPVIC*AGGQDR.C	1.17	1.15	0.9	0.991525	1.04545	0.9	3	0.978993	0.0735326	0.0751104	-0.0306291
576	Q8TDX7	NEK7 Serine/threonine-protein kinase Nek7	NEK7	K.MNLYSLC*K.K	1.19		0.95	1.00847		0.95	2	0.979237	0.0413478	0.0422245	-0.0302696
427	Q96P16	RPRD1A Regulation of nuclear pre-mRNA domain-containing p	RPRD1A	K.HVSSETDESC*KK.H	1.32		0.84	1.11864		0.84	2	0.979322	0.197031	0.201191	-0.0301448
595	Q86WX3	RPS19BP1 Active regulator of SIRT1	RPS19BP1	R.KAC*DRPVAK.T	1.18		0.96	1		0.96	2	0.98	0.0282843	0.0288615	-0.0291463
596	Q96F86	EDC3 Enhancer of mRNA-decapping protein 3	EDC3	K.SQDVAVSPQQQQC*SK.S	1.18		0.96	1		0.96	2	0.98	0.0282843	0.0288615	-0.0291463
269	P13010	XRCC5 X-ray repair cross-complementing protein 5	XRCC5	K.EDIQKETVYC*LNDDDETEVLKEDIIQGFR.Y	1.44		0.74	1.22034		0.74	2	0.980169	0.339651	0.346523	-0.0288969
834	P35250	RFC2 Replication factor C subunit 2	RFC2	K.TTSILC*LAR.A	0.98		1.13	0.830508		1.13	2	0.980254	0.211772	0.216038	-0.0287721
586	P62280	RPS11 40S ribosomal protein S11	RPS11	R.DVQIGDIVTVGEC*RPLSK.T	1.04	1.21	0.96	0.881356	1.1	0.96	3	0.980452	0.110748	0.112956	-0.0284811
1428	Q96S59	RANBP9 Ran-binding protein 9	RANBP9	R.QLC*GGSQAAIER.M	1.05	1.18		0.889831	1.07273		2	0.981279	0.129328	0.131795	-0.0272649
628	Q99439	CNN2 Calponin-2	CNN2	K.AGQCVIGLQMGTNKC*ASQSGMTAYGTR.R	1.16		0.98	0.983051		0.98	2	0.981525	0.00215727	0.00219788	-0.0269025
383	O43823	AKAP8 A-kinase anchor protein 8	AKAP8	K.ANDGGLAAGAPAMHMASYGPEPC*TDNSDSLIAK.I	1.35		0.82	1.14407		0.82	2	0.982034	0.229151	0.233343	-0.0261553
566	O43390	HNRNPR Heterogeneous nuclear ribonucleoprotein R	HNRNPR	K.SAFLC*GVMK.T	1.21		0.94	1.02542		0.94	2	0.982712	0.0604037	0.0614663	-0.0251596
409	P48643	CCT5 T-complex protein 1 subunit epsilon	CCT5	K.ETGANLAIC*QWGFDDEANHLLLQNNLPAVR.W		1.24	0.84		1.12727	0.84	2	0.983636	0.203132	0.206512	-0.023803
880	P15121	AKR1B1 Aldose reductase	AKR1B1	R.VC*ALLSCTSHK.D	1.34	0.71	1.17	1.13559	0.645455	1.17	3	0.983683	0.293419	0.298286	-0.0237352
452	P10809	HSPD1 60 kDa heat shock protein, mitochondrial	HSPD1	R.C*IPALDSLTPANEDQK.I	1.01	1.36	0.86	0.855932	1.23636	0.86	3	0.984099	0.218477	0.222008	-0.0231252
675	Q9NZB2	FAM120A Constitutive coactivator of PPAR-gamma-like protei	FAM120A	R.VAAASGHC*GAFSGSDSSR.T	1.12		1.02	0.949153		1.02	2	0.984576	0.0500967	0.0508815	-0.0224251
903	P43034	PAFAH1B1 Platelet-activating factor acetylhydrolase IB subu	PAFAH1B1	R.VWVVATKEC*K.A	1.01	1	1.19	0.855932	0.909091	1.19	3	0.985008	0.179507	0.182239	-0.0217931
629	O94906	PRPF6 Pre-mRNA-processing factor 6	PRPF6	R.AVAHC*PK.A	1.17		0.98	0.991525		0.98	2	0.985763	0.00814971	0.00826741	-0.0206877
384	O75914	PAK3 Serine/threonine-protein kinase PAK 3	PAK3	K.LTDFGFC*AQITPEQSKR.S	1.36		0.82	1.15254		0.82	2	0.986271	0.235143	0.238416	-0.0199437
726	P08729	KRT7 Keratin, type II cytoskeletal 7	KRT7	K.AQYEEMAKC*SR.A	1.09		1.05	0.923729		1.05	2	0.986864	0.0892872	0.0904757	-0.0190762
1438	Q9UQ80	PA2G4 Proliferation-associated protein 2G4	PA2G4	R.MGVVEC*AK.H	1.01	1.23		0.855932	1.11818		2	0.987057	0.185438	0.18787	-0.0187947
1050	Q6JBY9	RCSD1 CapZ-interacting protein	RCSD1	R.SQSDC*GELGDFR.A	0.75		1.34	0.635593		1.34	2	0.987797	0.498091	0.504244	-0.0177141
663	Q9P287	BCCIP BRCA2 and CDKN1A-interacting protein	BCCIP	R.FCEKNC*EK.S	1.14		1.01	0.966102		1.01	2	0.988051	0.0310408	0.0314162	-0.0173428
747	Q9NRX1	PNO1 RNA-binding protein PNO1	PNO1	R.TAIC*NLILGNPPSK.V	1.07		1.07	0.90678		1.07	2	0.98839	0.115414	0.11677	-0.0168479
439	P29590	PML Protein PML	PML	K.C*YASDQEVLDMHGFLR.Q	1.33		0.85	1.12712		0.85	2	0.988559	0.195952	0.19822	-0.0166006
585	Q56VL3	OCIAD2 OCIA domain-containing protein 2	OCIAD2	K.QSLLFC*PK.S	1.23	1.06	0.96	1.04237	0.963636	0.96	3	0.98867	0.0465438	0.0470772	-0.0164394
671	Q00839	HNRNPU Heterogeneous nuclear ribonucleoprotein U	HNRNPU	K.AVVVC*PK.D	1.17	1.05	1.02	0.991525	0.954545	1.02	3	0.98869	0.0328192	0.0331947	-0.0164094
453	P30042	C21orf33 ES1 protein homolog, mitochondrial	C21orf33	K.NLSTFAVDGKDC*K.V	0.92	1.46	0.86	0.779661	1.32727	0.86	3	0.988978	0.295713	0.299009	-0.0159898
546	O14929	HAT1 Histone acetyltransferase type B catalytic subunit	HAT1	K.VDENFDC*VEADDVEGK.I	1.25		0.92	1.05932		0.92	2	0.989661	0.0985156	0.0995447	-0.0149936
1109	P34932	HSPA4 Heat shock 70 kDa protein 4	HSPA4	K.KLMSANASDLPLSIEC*FMNDVDVSGTMNR.G	0.97	0.8	1.42	0.822034	0.727273	1.42	3	0.989769	0.375592	0.379474	-0.0148364
855	P50991	CCT4 T-complex protein 1 subunit delta	CCT4	K.TGC*NVLLIQK.S	0.98		1.15	0.830508		1.15	2	0.990254	0.225915	0.228138	-0.0141291
494	P18621	RPL17 60S ribosomal protein L17	RPL17	R.YNGGVGRC*AQAK.Q	1.29		0.89	1.09322		0.89	2	0.99161	0.143698	0.144914	-0.012155
672	P61247	RPS3A 40S ribosomal protein S3a	RPS3A	R.DKMC*SMVK.K	1.15	1.08	1.02	0.974576	0.981818	1.02	3	0.992131	0.024405	0.0245985	-0.0113968
350	Q01518	CAP1 Adenylyl cyclase-associated protein 1	CAP1	K.GKINSITVDNC*K.K	1.26	1.22	0.8	1.0678	1.10909	0.8	3	0.992296	0.167808	0.169111	-0.0111578
676	Q9BQG0	MYBBP1A Myb-binding protein 1A	MYBBP1A	K.AGTDPSHMPTGPQAASC*LDLNLVTR.V	1.14		1.02	0.966102		1.02	2	0.993051	0.0381119	0.0383786	-0.0100605
461	O75694	NUP155 Nuclear pore complex protein Nup155	NUP155	R.YVENPSQVLNC*ER.R	1.33		0.86	1.12712		0.86	2	0.993559	0.188881	0.190106	-0.00932199
660	Q9BV79	MECR Enoyl-[acyl-carrier-protein] reductase, mitochondr	MECR	R.LALNC*VGGK.S	1.35	0.91	1.01	1.14407	0.827273	1.01	3	0.99378	0.159019	0.160014	-0.00900133
556	Q9NVG8	TBC1D13 TBC1 domain family member 13	TBC1D13	R.LLQDYPITDVC*QILQK.A	1.25		0.93	1.05932		0.93	2	0.994661	0.0914445	0.0919353	-0.00772316
791	P18621	RPL17 60S ribosomal protein L17	RPL17	R.INPYMSSPC*HIEMILTEK.E	1.05		1.1	0.889831		1.1	2	0.994915	0.148612	0.149372	-0.00735445
505	P22102	GART Trifunctional purine biosynthetic protein adenosin	GART	K.SKEEAC*KAVQEIMQEK.A		1.2	0.9		1.09091	0.9	2	0.995455	0.134993	0.13561	-0.00657265
884	Q14318	FKBP8 Peptidyl-prolyl cis-trans isomerase FKBP8	FKBP8	R.SC*SLVLEHQPDNIK.A	0.97		1.17	0.822034		1.17	2	0.996017	0.246049	0.247033	-0.0057578
740	Q9UI30	TRMT112 Multifunctional methyltransferase subunit TRM112-l	TRMT112	R.IC*PVEFNPNFVAR.M	1.1		1.06	0.932203		1.06	2	0.996102	0.0903658	0.0907195	-0.00563506
571	P52566	ARHGDIB Rho GDP-dissociation inhibitor 2	ARHGDIB	R.LTLVC*ESAPGPITMDLTGDLEALKK.E		1.15	0.95		1.04545	0.95	2	0.997727	0.0674966	0.0676503	-0.00328258
721	Q01813	PFKP ATP-dependent 6-phosphofructokinase, platelet type	PFKP	K.GVFDC*R.K		1.04	1.05		0.945455	1.05	2	0.997727	0.0739248	0.0740932	-0.00328258
711	Q9BZX2	UCK2 Uridine-cytidine kinase 2	UCK2	K.RQTNGC*LNGYTPSR.K	1.13		1.04	0.957627		1.04	2	0.998814	0.0582464	0.0583156	-0.00171269
806	P62913	RPL11 60S ribosomal protein L11	RPL11	R.TGC*IGAK.H	1.05		1.11	0.889831		1.11	2	0.999915	0.155683	0.155697	-0.000122267
656	P17844	DDX5 Probable ATP-dependent RNA helicase DDX5	DDX5	R.LIDFLEC*GK.T	1.18		1	1		1	2	1	0	0	0
513	O94776	MTA2 Metastasis-associated protein MTA2	MTA2	R.ALDC*SSSIR.Q	1.3		0.9	1.10169		0.9	2	1.00085	0.14262	0.142499	0.00122211
748	Q14839	CHD4 Chromodomain-helicase-DNA-binding protein 4	CHD4	R.FAEVEC*LAESHQHLSK.E	1.1		1.07	0.932203		1.07	2	1.0011	0.0974369	0.0973297	0.00158853
529	Q9H081	MIS12 Protein MIS12 homolog	MIS12	R.IPSNILLPEDKC*K.E	1.29		0.91	1.09322		0.91	2	1.00161	0.129556	0.129348	0.00232112
547	Q99832	CCT7 T-complex protein 1 subunit eta	CCT7	R.YNFFTGC*PK.A	1.28		0.92	1.08475		0.92	2	1.00237	0.116493	0.116217	0.00341929
705	Q16576	RBBP7 Histone-binding protein RBBP7	RBBP7	R.VHIPNDDAQFDASHC*DSDKGEFGGFGSVTGK.I	1.27	0.98	1.04	1.07627	0.890909	1.04	3	1.00239	0.0982368	0.0980022	0.00344886
557	Q96PK6	RBM14 RNA-binding protein 14	RBM14	K.IFVGNVSAAC*TSQELR.S	1.27		0.93	1.07627		0.93	2	1.00314	0.103429	0.103106	0.00451663
1439	P49411	TUFM Elongation factor Tu, mitochondrial	TUFM	K.GDEC*ELLGHSK.N	1.05	1.23		0.889831	1.11818		2	1.00401	0.161469	0.160824	0.00576813
639	Q9H3R5	CENPH Centromere protein H	CENPH	R.AGGPPQVAGAQAAC*SEDR.M		1.12	0.99		1.01818	0.99	2	1.00409	0.0199276	0.0198464	0.00588989
677	Q96HE7	ERO1A ERO1-like protein alpha	ERO1A	K.HDDSSDNFC*EADDIQSPEAEYVDLLLNPER.Y	1.17		1.02	0.991525		1.02	2	1.00576	0.0201346	0.0200192	0.00828997
620	P45880	VDAC2 Voltage-dependent anion-selective channel protein	VDAC2	K.SC*SGVEFSTSGSSNTDTGK.V	1.15	1.17	0.98	0.974576	1.06364	0.98	3	1.00607	0.0499269	0.0496256	0.00873195
630	Q7L1Q6	BZW1 Basic leucine zipper and W2 domain-containing prot	BZW1	K.ERFDPTQFQDC*IIQGLTETGTDLEAVAK.F	1.22		0.98	1.0339		0.98	2	1.00695	0.0381119	0.0378488	0.00999083
688	P30041	PRDX6 Peroxiredoxin-6	PRDX6	R.DFTPVC*TTELGR.A	1.31	0.97	1.03	1.11017	0.881818	1.03	3	1.00733	0.115851	0.115009	0.0105353
161	Q7L576	CYFIP1 Cytoplasmic FMR1-interacting protein 1	CYFIP1	K.C*NEQPNRVEIYEK.T	1.48	1.21	0.67	1.25424	1.1	0.67	3	1.00808	0.302771	0.300345	0.0116088
448	Q9UHD8	SEPT9 Septin-9	2020-09-09	K.WGTIEVENTTHC*EFAYLR.D	1.73	0.77	0.86	1.4661	0.7	0.86	3	1.0087	0.404119	0.400633	0.012498
652	Q07020	RPL18 60S ribosomal protein L18	RPL18	K.GC*GTVLLSGPR.K	1.04	1.26	1	0.881356	1.14545	1	3	1.00894	0.132276	0.131104	0.0128358
1398	Q99439	CNN2 Calponin-2	CNN2	K.C*ASQVGMTAPGTR.R	1.27	1.04		1.07627	0.945455		2	1.01086	0.0925013	0.0915073	0.0155873
619	Q9Y277	VDAC3 Voltage-dependent anion-selective channel protein	VDAC3	K.SC*SGVEFSTSGHAYTDTGK.A	1.2	1.14	0.98	1.01695	1.03636	0.98	3	1.0111	0.0286328	0.0283183	0.0159318
562	P31943	HNRNPH1 Heterogeneous nuclear ribonucleoprotein H	HNRNPH1	R.DLNYC*FSGMSDHR.Y	1.36	1.04	0.94	1.15254	0.945455	0.94	3	1.01267	0.121168	0.119652	0.0181579
753	P15880	RPS2 40S ribosomal protein S2	RPS2	K.KLLMMAGIDDCYTSARGC*TATLGNFAK.A	1.12	1.11	1.08	0.949153	1.00909	1.08	3	1.01275	0.0655003	0.0646759	0.018275
495	Q13823	GNL2 Nucleolar GTP-binding protein 2	GNL2	K.KVC*NVAPIAGETK.V	1.34		0.89	1.13559		0.89	2	1.0128	0.173661	0.171466	0.0183445
538	Q6PKG0	LARP1 La-related protein 1	LARP1	R.TASISSSPSEGTPTVGSYGC*TPQSLPK.F	1.26	1.16	0.92	1.0678	1.05455	0.92	3	1.01411	0.081774	0.0806359	0.0202199
530	P08238	HSP90AB1 Heat shock protein HSP 90-beta	HSP90AB1	K.AKFENLC*K.L	1.32		0.91	1.11864		0.91	2	1.01432	0.147534	0.14545	0.0205158
759	Q1KMD3	HNRNPUL2 Heterogeneous nuclear ribonucleoprotein U-like pro	HNRNPUL2	K.VTQNLPMKEGC*TEVSLLR.V	1.12		1.08	0.949153		1.08	2	1.01458	0.0925231	0.0911939	0.0208773
462	P29401	TKT Transketolase	TKT	R.MAAISESNINLC*GSHCGVSIGEDGPSQMALEDLAMFR.S	1.38		0.86	1.16949		0.86	2	1.01475	0.218844	0.215663	0.0211183
548	P35998	PSMC2 26S proteasome regulatory subunit 7	PSMC2	R.SVC*TEAGMFAIR.A	1.31		0.92	1.11017		0.92	2	1.01508	0.13447	0.132472	0.0216002
300	P08559	PDHA1 Pyruvate dehydrogenase E1 component subunit alpha,	PDHA1	K.NFYGGNGIVGAQVPLGAGIALAC*K.Y	1.5		0.76	1.27119		0.76	2	1.01559	0.361463	0.355914	0.0223227
712	P35250	RFC2 Replication factor C subunit 2	RFC2	R.FALAC*NASDK.I	1.17		1.04	0.991525		1.04	2	1.01576	0.0342767	0.0337448	0.0225634
1204	Q96C36	PYCR2 Pyrroline-5-carboxylate reductase 2	PYCR2	K.MLLDSEQHPC*QLK.D	0.61	0.97	1.65	0.516949	0.881818	1.65	3	1.01626	0.578365	0.569114	0.0232636
865	Q14684	RRP1B Ribosomal RNA processing protein 1 homolog B	RRP1B	R.VMSNLVEHNGVLESEAGQPQALGSSGTC*SSLKK.Q	1.03		1.16	0.872881		1.16	2	1.01644	0.203024	0.19974	0.023526
584	P30084	ECHS1 Enoyl-CoA hydratase, mitochondrial	ECHS1	K.EMQNLSFQDC*YSSK.F	1.35	1.04	0.96	1.14407	0.945455	0.96	3	1.01651	0.11071	0.108912	0.0236208
830	Q01813	PFKP ATP-dependent 6-phosphofructokinase, platelet type	PFKP	R.LPLMEC*VQMTQDVQK.A	1.29	0.91	1.13	1.09322	0.827273	1.13	3	1.01683	0.165189	0.162455	0.02408
657	O00429	DNM1L Dynamin-1-like protein	DNM1L	R.IIQHC*SNYSTQELLR.F	1.22		1	1.0339		1	2	1.01695	0.0239697	0.0235702	0.0242475
662	A0AVT1	UBA6 Ubiquitin-like modifier-activating enzyme 6	UBA6	R.KPNVGC*QQDSEELLK.L	1.23	1.1	1.01	1.04237	1	1.01	3	1.01746	0.022149	0.0217689	0.0249687
678	Q96I24	FUBP3 Far upstream element-binding protein 3	FUBP3	R.SSGC*FPNMAAK.V	1.2		1.02	1.01695		1.02	2	1.01847	0.00215727	0.00211814	0.02641
909	Q9Y2U8	LEMD3 Inner nuclear membrane protein Man1	LEMD3	R.TPGGLC*R.I	1		1.19	0.847458		1.19	2	1.01873	0.242214	0.237761	0.0267701
801	P62306	SNRPF Small nuclear ribonucleoprotein F	SNRPF	R.C*NNVLYIR.G	1.16	1.06	1.11	0.983051	0.963636	1.11	3	1.0189	0.0794935	0.0780193	0.0270064
463	P36507	MAP2K2 Dual specificity mitogen-activated protein kinase	MAP2K2	K.C*LIKNPAER.A	1.39		0.86	1.17797		0.86	2	1.01898	0.224836	0.220647	0.0271301
807	Q1KMD3	HNRNPUL2 Heterogeneous nuclear ribonucleoprotein U-like pro	HNRNPUL2	K.GKVC*FEAK.V	1.1		1.11	0.932203		1.11	2	1.0211	0.125721	0.123123	0.0301266
658	P24941	CDK2 Cyclin-dependent kinase 2	CDK2	R.APEILLGC*K.Y	1.23		1	1.04237		1	2	1.02119	0.0299622	0.0293405	0.0302463
885	P46782	RPS5 40S ribosomal protein S5	RPS5	K.TIAEC*LADELINAAK.G	1.03		1.17	0.872881		1.17	2	1.02144	0.210095	0.205685	0.0306054
577	Q9NPD3	EXOSC4 Exosome complex component RRP41	EXOSC4	K.SC*EMGLQLR.Q	1.29		0.95	1.09322		0.95	2	1.02161	0.101272	0.0991299	0.0308448
1422	Q9UJX3	ANAPC7 Anaphase-promoting complex subunit 7	ANAPC7	R.AISTIC*SLEKK.S	1.19	1.14		1.00847	1.03636		2	1.02242	0.0197205	0.0192881	0.0319867
488	Q15365	PCBP1 Poly(rC)-binding protein 1	PCBP1	R.AITIAGVPQSVTEC*VK.Q	1.49	1.01	0.89	1.26271	0.918182	0.89	3	1.02363	0.207529	0.202738	0.0336961
521	O60610	DIAPH1 Protein diaphanous homolog 1	DIAPH1	K.AGC*AVTSLLASELTKDDAMAAVPAK.V	1.35	1.12	0.91	1.14407	1.01818	0.91	3	1.02408	0.117145	0.114391	0.0343329
792	P54886	ALDH18A1 Delta-1-pyrroline-5-carboxylate synthase	ALDH18A1	K.LGSAVVTRGDEC*GLALGR.L	1.12		1.1	0.949153		1.1	2	1.02458	0.106665	0.104107	0.0350274
821	P83881	RPL36A 60S ribosomal protein L36a	RPL36A	R.LEC*VEPNC*R.S	1.1		1.12	0.932203		1.12	2	1.0261	0.132792	0.129414	0.0371737
820	Q92879	CELF1 CUGBP Elav-like family member 1	CELF1	K.KC*TENDIR.V	1.1		1.12	0.932203		1.12	2	1.0261	0.132792	0.129414	0.0371737
694	P49368	CCT3 T-complex protein 1 subunit gamma	CCT3	R.TLIQNC*GASTIR.L	1.21		1.03	1.02542		1.03	2	1.02771	0.00323591	0.00314866	0.0394358
549	Q8TAE8	GADD45GIP1 Growth arrest and DNA damage-inducible proteins-in	GADD45GIP1	R.EQHIAEC*MAK.M	1.34		0.92	1.13559		0.92	2	1.0278	0.152447	0.148325	0.0395548
802	P62753	RPS6 40S ribosomal protein S6	RPS6	K.LNISFPATGC*QK.L	1.13	1.12	1.11	0.957627	1.01818	1.11	3	1.0286	0.0767191	0.0745858	0.0406862
866	Q15054	POLD3 DNA polymerase delta subunit 3	POLD3	K.FSAIQC*AAAVPR.A	1.06		1.16	0.898305		1.16	2	1.02915	0.185046	0.179804	0.0414568
328	Q9UBB4	ATXN10 Ataxin-10	ATXN10	R.C*GLQFLGNIASR.N	1.51		0.78	1.27966		0.78	2	1.02983	0.353314	0.343079	0.0424069
955	P49327	FASN Fatty acid synthase	FASN	R.LGMLSPEGTC*K.A	1.17	0.96	1.23	0.991525	0.872727	1.23	3	1.03142	0.181946	0.176404	0.0446285
760	Q9BW27	NUP85 Nuclear pore complex protein Nup85	NUP85	R.FLRDYC*ER.G	1.16		1.08	0.983051		1.08	2	1.03153	0.0685534	0.0664583	0.0447794
520	Q9Y3A3	MOB4 MOB-like protein phocein	MOB4	R.HTLDGAAC*LLNSNK.Y	1.42	1.08	0.91	1.20339	0.981818	0.91	3	1.03174	0.152932	0.148228	0.0450739
904	Q96PU4	UHRF2 E3 ubiquitin-protein ligase UHRF2	UHRF2	R.GMAC*VGR.T	1.07	1.1	1.19	0.90678	1	1.19	3	1.03226	0.14434	0.139829	0.0458062
707	P61158	ACTR3 Actin-related protein 3	ACTR3	R.LPACVVDC*GTGYTK.L	1.26	1.09	1.04	1.0678	0.990909	1.04	3	1.0329	0.0389321	0.037692	0.0467032
1047	P60981	DSTN Destrin	DSTN	K.C*STPEEIKK.R	1.5	0.54	1.34	1.27119	0.490909	1.34	3	1.03403	0.471615	0.456093	0.0482806
1104	Q9BW19	KIFC1 Kinesin-like protein KIFC1	KIFC1	K.VNQC*VIGTAQANRK.-	0.78		1.41	0.661017		1.41	2	1.03551	0.529611	0.51145	0.0503394
695	P36969	GPX4 Phospholipid hydroperoxide glutathione peroxidase,	GPX4	R.YAEC*GLR.I	1.23		1.03	1.04237		1.03	2	1.03619	0.00874895	0.00844341	0.0512836
793	Q8TDN6	BRIX1 Ribosome biogenesis protein BRX1 homolog	BRIX1	R.DRIPGPVC*K.G	1.15		1.1	0.974576		1.1	2	1.03729	0.088688	0.0854998	0.0528167
621	P46776	RPL27A 60S ribosomal protein L27a	RPL27A	K.RNQSFC*PTVNLDK.L	1.09	1.33	0.98	0.923729	1.20909	0.98	3	1.03761	0.151151	0.145673	0.0532595
727	P28838	LAP3 Cytosol aminopeptidase	LAP3	R.SAGAC*TAAAFLK.E	1.21		1.05	1.02542		1.05	2	1.03771	0.017378	0.0167465	0.0534059
808	P53611	RABGGTB Geranylgeranyl transferase type-2 subunit beta	RABGGTB	K.KDDYEYC*MSEYLR.M	1.14		1.11	0.966102		1.11	2	1.03805	0.101751	0.0980217	0.0538771
840	P61163	ACTR1A Alpha-centractin	ACTR1A	R.AC*YLSINPQKDETLETEK.A	1.24	1.02	1.14	1.05085	0.927273	1.14	3	1.03937	0.106827	0.10278	0.055714
719	O75348	ATP6V1G1 V-type proton ATPase subunit G 1	ATP6V1G1	R.GSC*STEVEKETQEK.M	1.38	0.99	1.05	1.16949	0.9	1.05	3	1.03983	0.135033	0.129861	0.0563484
609	P78347	GTF2I General transcription factor II-I	GTF2I	R.KMVDQLFC*K.K	1.31		0.97	1.11017		0.97	2	1.04008	0.0991148	0.0952949	0.0567011
1435	P23396	RPS3 40S ribosomal protein S3	RPS3	R.AC*YGVLR.F	1.16	1.21		0.983051	1.1		2	1.04153	0.0826955	0.0793985	0.0586981
706	Q15366	PCBP2 Poly(rC)-binding protein 2	PCBP2	R.AITIAGIPQSIIEC*VK.Q	1.39	1	1.04	1.17797	0.909091	1.04	3	1.04235	0.134453	0.12899	0.059843
708	Q00839	HNRNPU Heterogeneous nuclear ribonucleoprotein U	HNRNPU	K.GNFTLPEVAEC*FDEITYVELQKEEAQK.L	1.2	1.18	1.04	1.01695	1.07273	1.04	3	1.04323	0.0280286	0.0268673	0.061051
897	Q9Y2Q5	LAMTOR2 Ragulator complex protein LAMTOR2	LAMTOR2	K.FILMDC*MEGR.V	1.07		1.18	0.90678		1.18	2	1.04339	0.193196	0.185162	0.0612783
597	Q8WUM4	PDCD6IP Programmed cell death 6-interacting protein	PDCD6IP	K.AVQADGQVKEC*YQSHR.D	1.33		0.96	1.12712		0.96	2	1.04356	0.118171	0.113238	0.0615126
679	P35270	SPR Sepiapterin reductase	SPR	K.GKLVDC*K.V	1.26		1.02	1.0678		1.02	2	1.0439	0.0337973	0.0323761	0.0619812
631	Q14847	LASP1 LIM and SH3 domain protein 1	LASP1	K.ACFHC*ETCK.M	1.31		0.98	1.11017		0.98	2	1.04508	0.0920437	0.088073	0.0636199
786	P00813	ADA Adenosine deaminase	ADA	K.FDYYMPAIAGC*R.E		1.09	1.1		0.990909	1.1	2	1.04545	0.0771389	0.0737851	0.0641303
1006	Q9UNH7	SNX6 Sorting nexin-6	SNX6	R.IGSSLYALGTQDSTDIC*K.F	1.14	0.97	1.29	0.966102	0.881818	1.29	3	1.04597	0.215494	0.206023	0.064846
728	Q00613	HSF1 Heat shock factor protein 1	HSF1	K.GKQEC*MDSK.L	1.23		1.05	1.04237		1.05	2	1.04619	0.00539319	0.00515509	0.06514
831	Q9H2U1	DHX36 ATP-dependent RNA helicase DHX36	DHX36	K.NTPC*SENKLDIQEK.K		1.06	1.13		0.963636	1.13	2	1.04682	0.117637	0.112376	0.0660109
956	Q00534	CDK6 Cyclin-dependent kinase 6	CDK6	R.ADQQYEC*VAEIGEGAYGK.V	0.99	1.18	1.23	0.838983	1.07273	1.23	3	1.04724	0.196751	0.187876	0.0665877
852	P62241	RPS8 40S ribosomal protein S8	RPS8	R.ALRLDVGNFSWGSEC*CTR.K	0.99	1.27	1.15	0.838983	1.15455	1.15	3	1.04784	0.180892	0.172633	0.0674223
281	Q63HN8	RNF213 E3 ubiquitin-protein ligase RNF213	RNF213	K.AVLEC*KPLGIK.T	1.59		0.75	1.34746		0.75	2	1.04873	0.422466	0.402837	0.0686417
920	P0CG22	DHRS4L1 Putative dehydrogenase/reductase SDR family member	DHRS4L1	R.VNC*LAPGLIK.T	1.06		1.2	0.898305		1.2	2	1.04915	0.213331	0.203336	0.0692245
646	Q08211	DHX9 ATP-dependent RNA helicase A	DHX9	K.LAAQSC*ALSLVR.Q	1.31		0.99	1.11017		0.99	2	1.05008	0.0849727	0.0809198	0.0705058
710	P68104	EEF1A1 Elongation factor 1-alpha 1	EEF1A1	K.PMC*VESFSDYPPLGR.F	1.15	1.25	1.04	0.974576	1.13636	1.04	3	1.05031	0.0813853	0.0774867	0.0708197
169	O15111	CHUK Inhibitor of nuclear factor kappa-B kinase subunit	CHUK	R.KPASQC*VLDGVR.G	1.69		0.67	1.4322		0.67	2	1.0511	0.538959	0.512756	0.0719023
822	Q9NQR4	NIT2 Omega-amidase NIT2	NIT2	R.VGLGIC*YDMR.F	1.16		1.12	0.983051		1.12	2	1.05153	0.0968377	0.0920926	0.0724837
1151	Q12788	TBL3 Transducin beta-like protein 3	TBL3	R.FLGPEDSHVVVASNSPC*LK.V	0.75		1.47	0.635593		1.47	2	1.0528	0.590015	0.560426	0.0742267
921	Q8IXM2	BAP18 Chromatin complexes subunit BAP18	BAP18	R.FGDDLNHISC*VIK.E	1.07		1.2	0.90678		1.2	2	1.05339	0.207338	0.196829	0.0750394
632	P48739	PITPNB Phosphatidylinositol transfer protein beta isoform	PITPNB	K.ELANSPDC*PQMCAYK.L	1.33		0.98	1.12712		0.98	2	1.05356	0.104029	0.0987401	0.0752715
856	Q00610	CLTC Clathrin heavy chain 1	CLTC	R.IHEGC*EEPATHNALAK.I	1.13		1.15	0.957627		1.15	2	1.05381	0.136028	0.129082	0.0756196
794	P23526	AHCY Adenosylhomocysteinase	AHCY	K.SKFDNLYGC*R.E	1.19		1.1	1.00847		1.1	2	1.05424	0.0647182	0.0613887	0.0761996
867	Q13155	AIMP2 Aminoacyl tRNA synthase complex-interacting multif	AIMP2	R.LLC*EHFR.V	1.12		1.16	0.949153		1.16	2	1.05458	0.149092	0.141376	0.0766634
981	Q14353	GAMT Guanidinoacetate N-methyltransferase	GAMT	K.VQEAPIDEHWIIEC*NDGVFQR.L	1.25	0.93	1.26	1.05932	0.845455	1.26	3	1.05493	0.207308	0.196514	0.0771412
496	O76071	CIAO1 Probable cytosolic iron-sulfur protein assembly pr	CIAO1	K.SVAWAPSGNLLATC*SR.D	1.44		0.89	1.22034		0.89	2	1.05517	0.233585	0.221372	0.0774748
1173	P34932	HSPA4 Heat shock 70 kDa protein 4	HSPA4	R.AGGIETIANEYSDRC*TPACISFGPK.N	1.05	0.81	1.54	0.889831	0.736364	1.54	3	1.0554	0.426635	0.404241	0.0777872
741	O95372	LYPLA2 Acyl-protein thioesterase 2	LYPLA2	K.TYPGVMHSSC*PQEMAAVK.E	1.24		1.06	1.05085		1.06	2	1.05542	0.00647182	0.00613197	0.0778223
180	P34932	HSPA4 Heat shock 70 kDa protein 4	HSPA4	R.KFDEVLVNHFC*EEFGKK.Y	1.4	1.43	0.68	1.18644	1.3	0.68	3	1.05548	0.330095	0.312744	0.0778996
428	P49841	GSK3B Glycogen synthase kinase-3 beta	GSK3B	R.TTSFAESC*KPVQQPSAFGSMK.V	1.5		0.84	1.27119		0.84	2	1.05559	0.304895	0.288837	0.078054
898	P13639	EEF2 Elongation factor 2	EEF2	R.YVEPIEDVPC*GNIVGLVGVDQFLVK.T	1.1		1.18	0.932203		1.18	2	1.0561	0.175219	0.165911	0.0787488
737	P37198	NUP62 Nuclear pore glycoprotein p62	NUP62	K.DIIEHLNTSGAPADTSDPLQQIC*K.I	1.18	1.22	1.06	1	1.10909	1.06	3	1.05636	0.0546363	0.0517211	0.0791065
1457	Q5JTH9	RRP12 RRP12-like protein	RRP12	K.AAQHGVC*SVLK.G	1.12	1.28		0.949153	1.16364		2	1.05639	0.151663	0.143567	0.0791486
776	Q9UBU9	NXF1 Nuclear RNA export factor 1	NXF1	R.SC*MAATLR.I	1.21		1.09	1.02542		1.09	2	1.05771	0.0456623	0.0431708	0.0809467
863	P50914	RPL14 60S ribosomal protein L14	RPL14	K.C*MQLTDFILK.F	1.06	1.23	1.16	0.898305	1.11818	1.16	3	1.05883	0.140581	0.132771	0.0824696
729	P36507	MAP2K2 Dual specificity mitogen-activated protein kinase	MAP2K2	K.LC*DFGVSGQLIDSMANSFVGTR.S	1.26		1.05	1.0678		1.05	2	1.0589	0.0125841	0.0118841	0.082564
440	P23528	CFL1 Cofilin-1	CFL1	K.HELQANCYEEVKDRC*TLAEK.L	1.5		0.85	1.27119		0.85	2	1.06059	0.297824	0.280809	0.0848714
640	Q9Y696	CLIC4 Chloride intracellular channel protein 4	CLIC4	K.AGSDGESIGNC*PFSQR.L	1.23	1.27	0.99	1.04237	1.15455	0.99	3	1.06231	0.0840643	0.0791338	0.0871996
313	Q14247	CTTN Src substrate cortactin	CTTN	K.HC*SQVDSVR.G	1.6		0.77	1.35593		0.77	2	1.06297	0.414317	0.389774	0.0880956
730	Q9Y6E2	BZW2 Basic leucine zipper and W2 domain-containing prot	BZW2	K.MTNHC*VFSANEDHETIR.N	1.27		1.05	1.07627		1.05	2	1.06314	0.0185765	0.0174733	0.0883256
957	Q5JTH9	RRP12 RRP12-like protein	RRP12	K.GHSSDSNPAIC*R.H	1.06		1.23	0.898305		1.23	2	1.06415	0.234544	0.220404	0.089705
680	P35998	PSMC2 26S proteasome regulatory subunit 7	PSMC2	K.IDPTVTMMQVEEKPDVTYSDVGGC*K.E	1.31		1.02	1.11017		1.02	2	1.06508	0.0637595	0.0598633	0.0909682
531	Q16851	UGP2 UTP--glucose-1-phosphate uridylyltransferase	UGP2	K.LNGGLGTSMGC*K.G	1.44		0.91	1.22034		0.91	2	1.06517	0.219443	0.206017	0.091083
664	Q96KB5	PBK Lymphokine-activated killer T-cell-originated prot	PBK	K.INPIC*NDHYR.S	1.33		1.01	1.12712		1.01	2	1.06856	0.0828154	0.0775019	0.095667
598	Q9HB71	CACYBP Calcyclin-binding protein	CACYBP	K.TDTVLILC*R.K	1.39		0.96	1.17797		0.96	2	1.06898	0.154125	0.144179	0.096239
1462	Q9UET6	FTSJ1 Putative tRNA (cytidine(32)/guanosine(34)-2-O)-me	FTSJ1	K.EIRPQDC*PISR.V	1.13	1.3		0.957627	1.18182		2	1.06972	0.158527	0.148195	0.0972368
610	O15067	PFAS Phosphoribosylformylglycinamidine synthase	PFAS	R.GLAPLHWADDDGNPTEQYPLNPNGSPGGVAGICSC*DGR.H	1.38		0.97	1.16949		0.97	2	1.06975	0.141062	0.131865	0.097268
843	Q9BVC5	C2orf49 Ashwin	C2orf49	R.SC*TDSELLLHPELLSQEFLLLTLEQK.N	1.18		1.14	1		1.14	2	1.07	0.0989949	0.0925186	0.0976108
1113	P43490	NAMPT Nicotinamide phosphoribosyltransferase	NAMPT	R.DLLNC*SFK.C	0.85		1.42	0.720339		1.42	2	1.07017	0.494735	0.462296	0.0978393
803	P62753	RPS6 40S ribosomal protein S6	RPS6	K.GHSC*YR.P	1.23	1.17	1.11	1.04237	1.06364	1.11	3	1.072	0.0345812	0.0322585	0.100309
497	Q9Y3C4	TPRKB EKC/KEOPS complex subunit TPRKB	TPRKB	K.LSSQEESIGTLLDAIIC*R.M	1.48		0.89	1.25424		0.89	2	1.07212	0.257555	0.24023	0.100465
351	P35998	PSMC2 26S proteasome regulatory subunit 7	PSMC2	R.AVANRTDAC*FIR.V	1.16	1.58	0.8	0.983051	1.43636	0.8	3	1.07314	0.327607	0.30528	0.101836
673	Q9Y277	VDAC3 Voltage-dependent anion-selective channel protein	VDAC3	K.YMLDC*R.T	1.32	1.19	1.02	1.11864	1.08182	1.02	3	1.07349	0.0498469	0.0464346	0.102305
857	Q13620	CUL4B Cullin-4B	CUL4B	R.RTLQSLAC*GK.A	1.18		1.15	1		1.15	2	1.075	0.106066	0.0986661	0.104337
1436	Q9Y314	NOSIP Nitric oxide synthase-interacting protein	NOSIP	K.NC*TAGAVYTYHEK.K	1.24	1.21		1.05085	1.1		2	1.07542	0.0347561	0.0323185	0.104905
665	P50991	CCT4 T-complex protein 1 subunit delta	CCT4	K.ITGC*ASPGK.T	1.35		1.01	1.14407		1.01	2	1.07703	0.0948002	0.0880197	0.107064
841	P33992	MCM5 DNA replication licensing factor MCM5	MCM5	K.C*SPIGVYTSGK.G	1.32	1.07	1.14	1.11864	0.972727	1.14	3	1.07712	0.0910384	0.0845199	0.107184
681	Q9UL46	PSME2 Proteasome activator complex subunit 2	PSME2	K.C*GFLPGNEK.V	1.34		1.02	1.13559		1.02	2	1.0778	0.0817367	0.0758369	0.108085
674	P18858	LIG1 DNA ligase 1	LIG1	R.VREDKQPEQATTSAQVAC*LYR.K		1.25	1.02		1.13636	1.02	2	1.07818	0.0822815	0.0763151	0.1086
1406	P04181	OAT Ornithine aminotransferase, mitochondrial	OAT	K.VLPMNTGVEAGETAC*K.L	1.4	1.07		1.18644	0.972727		2	1.07958	0.151118	0.139978	0.110475
992	P11766	ADH5 Alcohol dehydrogenase class-3	ADH5	K.IDPLAPLDKVCLLGC*GISTGYGAAVNTAK.L	1.05		1.27	0.889831		1.27	2	1.07992	0.26882	0.248927	0.110918
731	Q9NW64	RBM22 Pre-mRNA-splicing factor RBM22	RBM22	R.WC*PGVR.M	1.31		1.05	1.11017		1.05	2	1.08008	0.0425463	0.0393916	0.111145
498	P40222	TXLNA Alpha-taxilin	TXLNA	R.VTEAPC*YPGAPSTEASGQTGPQEPTSAR.A	1.5		0.89	1.27119		0.89	2	1.08059	0.26954	0.249437	0.111824
742	Q13561	DCTN2 Dynactin subunit 2	DCTN2	R.C*DQDAQNPLSAGLQGAC*LMETVELLQAK.V	1.3		1.06	1.10169		1.06	2	1.08085	0.0294828	0.0272774	0.112163
1423	P60709	ACTB Actin, cytoplasmic 1	ACTB	R.CPEALFQPSFLGMESC*GIHETTFNSIMK.C	1.33	1.14		1.12712	1.03636		2	1.08174	0.0641735	0.0593242	0.113355
1458	P04183	TK1 Thymidine kinase, cytosolic	TK1	R.YSSSFC*THDR.N	1.18	1.28		1	1.16364		2	1.08182	0.115708	0.106957	0.113458
1499	Q63ZY3	KANK2 KN motif and ankyrin repeat domain-containing prot	KANK2	R.HSAYSYC*GR.G	0.85	1.59		0.720339	1.44545		2	1.0829	0.512734	0.473484	0.114896
935	P46782	RPS5 40S ribosomal protein S5	RPS5	R.VNQAIWLLC*TGAR.E	1.13		1.21	0.957627		1.21	2	1.08381	0.178455	0.164654	0.116117
934	Q86VP6	CAND1 Cullin-associated NEDD8-dissociated protein 1	CAND1	R.LSTLC*PSAVLQR.L	1.13		1.21	0.957627		1.21	2	1.08381	0.178455	0.164654	0.116117
851	P63244	RACK1 Receptor of activated protein C kinase 1	RACK1	K.VWNLANC*K.L	1.15	1.24	1.15	0.974576	1.12727	1.15	3	1.08395	0.0953994	0.0880109	0.116298
809	O00148	DDX39A ATP-dependent RNA helicase DDX39A	DDX39A	R.AIVDC*GFEHPSEVQHECIPQAILGMDVLCQAK.S	1.25		1.11	1.05932		1.11	2	1.08466	0.0358347	0.0330377	0.117244
965	P08708	RPS17 40S ribosomal protein S17	RPS17	K.RVC*EEIAIIPSK.K	1.24	1.06	1.24	1.05085	0.963636	1.24	3	1.08483	0.141281	0.130233	0.117466
723	P21333	FLNA Filamin-A	FLNA	K.VGTEC*GNQK.V	1.36	1.16	1.05	1.15254	1.05455	1.05	3	1.0857	0.0579353	0.0533624	0.11862
835	P25705	ATP5A1 ATP synthase subunit alpha, mitochondrial	ATP5A1	K.YTIVVSATASDAAPLQYLAPYSGC*SMGEYFR.D	1.23		1.13	1.04237		1.13	2	1.08619	0.0619617	0.0570452	0.119272
1196	Q04941	PLP2 Proteolipid protein 2	PLP2	R.LSAPGC*WAACTNFSR.T	0.68		1.6	0.576271		1.6	2	1.08814	0.723886	0.665253	0.121858
682	Q9NXG2	THUMPD1 THUMP domain-containing protein 1	THUMPD1	R.RC*DAGGPR.Q	1.37		1.02	1.16102		1.02	2	1.09051	0.099714	0.0914381	0.125001
761	Q6YN16	HSDL2 Hydroxysteroid dehydrogenase-like protein 2	HSDL2	K.TAIHTAAMDMLGGPGIESQC*R.K	1.3		1.08	1.10169		1.08	2	1.09085	0.0153406	0.014063	0.125449
862	P78417	GSTO1 Glutathione S-transferase omega-1	GSTO1	K.KLLPDDPYEKAC*QK.M	1.21	1.2	1.16	1.02542	1.09091	1.16	3	1.09211	0.0672962	0.0616203	0.127119
1452	Q01518	CAP1 Adenylyl cyclase-associated protein 1	CAP1	R.ALLVTASQC*QQPAENK.L	1.23	1.26		1.04237	1.14545		2	1.09391	0.0728897	0.0666321	0.129499
774	Q15003	NCAPH Condensin complex subunit 2	NCAPH	K.FTNTQITEHYSTC*IK.L	1.46	1.05	1.09	1.23729	0.954545	1.09	3	1.09394	0.141413	0.129269	0.12954
514	O95983	MBD3 Methyl-CpG-binding domain protein 3	MBD3	K.NPGVWLNTTQPLC*K.A	1.52		0.9	1.28814		0.9	2	1.09407	0.274453	0.250856	0.129702
622	Q99719	SEPT5 Septin-5	2020-09-05	R.AHC*IQQMTSK.L		1.33	0.98		1.20909	0.98	2	1.09455	0.161992	0.147999	0.130332
654	O00571	DDX3X ATP-dependent RNA helicase DDX3X	DDX3X	R.GGNSRWC*DKSDEDDWSKPLPPSER.L	1.25	1.35	1	1.05932	1.22727	1	3	1.09553	0.117884	0.107604	0.131631
936	Q8TDX7	NEK7 Serine/threonine-protein kinase Nek7	NEK7	R.AAC*LLDGVPVALKK.V	1.16		1.21	0.983051		1.21	2	1.09653	0.160477	0.146351	0.132939
647	P32969	RPL9 60S ribosomal protein L9	RPL9	R.TIC*SHVQNMIK.G	1.42		0.99	1.20339		0.99	2	1.09669	0.150889	0.137586	0.133162
784	Q15631	TSN Translin	TSN	R.GFNKETAAAC*VEK.-	1.61	0.91	1.1	1.36441	0.827273	1.1	3	1.09723	0.268578	0.244779	0.133861
886	Q9HC36	MRM3 rRNA methyltransferase 3, mitochondrial	MRM3	K.ASDHGWVC*DQR.V	1.21		1.17	1.02542		1.17	2	1.09771	0.102231	0.0931309	0.134499
844	Q6P2E9	EDC4 Enhancer of mRNA-decapping protein 4	EDC4	R.LC*TQLEGLQSTVTGHVER.A	1.25		1.14	1.05932		1.14	2	1.09966	0.0570479	0.0518777	0.137059
696	P60981	DSTN Destrin	DSTN	K.HECQANGPEDLNRAC*IAEK.L	1.38		1.03	1.16949		1.03	2	1.09975	0.0986354	0.0896893	0.13717
567	Q02218	OGDH 2-oxoglutarate dehydrogenase, mitochondrial	OGDH	R.FGLEGC*EVLIPALK.T	1.49		0.94	1.26271		0.94	2	1.10136	0.228192	0.207192	0.139281
162	A0A075B759	PPIAL4E Peptidyl-prolyl cis-trans isomerase A-like 4E	PPIAL4E	R.IIPGFMC*QGGDFTR.P	1.33	1.66	0.67	1.12712	1.50909	0.67	3	1.10207	0.420106	0.381197	0.140216
777	O15226	NKRF NF-kappa-B-repressing factor	NKRF	K.SSQC*HTGSSPR.G	1.32		1.09	1.11864		1.09	2	1.10432	0.0202544	0.018341	0.143161
984	Q9BVP2	GNL3 Guanine nucleotide-binding protein-like 3	GNL3	K.LLGGFQETC*SK.A	1.12		1.26	0.949153		1.26	2	1.10458	0.219802	0.198992	0.143493
868	O95478	NSA2 Ribosome biogenesis protein NSA2 homolog	NSA2	K.VC*FVGDGFTR.K	1.24		1.16	1.05085		1.16	2	1.10542	0.0771825	0.0698216	0.144599
788	P18621	RPL17 60S ribosomal protein L17	RPL17	R.YSLDPENPTKSC*K.S	1.02	1.49	1.1	0.864407	1.35455	1.1	3	1.10632	0.24513	0.221573	0.145765
945	P39023	RPL3 60S ribosomal protein L3	RPL3	K.TVFAEHISDEC*K.R	1.17	1.22	1.22	0.991525	1.10909	1.22	3	1.10687	0.114253	0.103222	0.146489
532	Q9NVS9	PNPO Pyridoxine-5-phosphate oxidase	PNPO	K.KLPEEEAEC*YFHSRPK.S	1.54		0.91	1.30508		0.91	2	1.10754	0.279367	0.252241	0.147362
1110	Q14839	CHD4 Chromodomain-helicase-DNA-binding protein 4	CHD4	R.HLC*EPGADGAETFADGVPR.E	1.12	1.05	1.42	0.949153	0.954545	1.42	3	1.1079	0.270301	0.243976	0.147827
922	Q52LJ0	FAM98B Protein FAM98B	FAM98B	K.TAC*AINK.V	1.2		1.2	1.01695		1.2	2	1.10847	0.129436	0.11677	0.148576
561	P50570	DNM2 Dynamin-2	DNM2	K.LQDAFSSIGQSC*HLDLPQIAVVGGQSAGK.S	1.71	1.03	0.94	1.44915	0.936364	0.94	3	1.10851	0.295015	0.266137	0.148616
845	Q9Y508	RNF114 E3 ubiquitin-protein ligase RNF114	RNF114	R.DC*GGAAQLAGPAAEADPLGR.F	1.28		1.14	1.08475		1.14	2	1.11237	0.0390706	0.0351237	0.15364
861	P57721	PCBP3 Poly(rC)-binding protein 3	PCBP3	R.LVVPASQC*GSLIGK.G	1.32	1.17	1.16	1.11864	1.06364	1.16	3	1.11409	0.0483427	0.043392	0.15587
515	P10620	MGST1 Microsomal glutathione S-transferase 1	MGST1	K.VFANPEDC*VAFGK.G	1.57		0.9	1.33051		0.9	2	1.11525	0.304415	0.272956	0.157373
599	O60343	TBC1D4 TBC1 domain family member 4	TBC1D4	R.SQKPEAGGC*GAPAAR.E	1.5		0.96	1.27119		0.96	2	1.11559	0.220042	0.197242	0.157811
633	P07900	HSP90AA1 Heat shock protein HSP 90-alpha	HSP90AA1	R.VFIMDNC*EELIPEYLNFIR.G	1.48		0.98	1.25424		0.98	2	1.11712	0.193915	0.173585	0.159782
480	P06239	LCK Tyrosine-protein kinase Lck	LCK	R.HYTNASDGLC*TR.L		1.49	0.88		1.35455	0.88	2	1.11727	0.335554	0.300333	0.159981
993	Q04726	TLE3 Transducin-like enhancer protein 3	TLE3	K.SPISQLDC*LNR.D	1.14		1.27	0.966102		1.27	2	1.11805	0.214889	0.192199	0.160986
950	Q00839	HNRNPU Heterogeneous nuclear ribonucleoprotein U	HNRNPU	K.MC*LFAGFQR.K	1.2		1.22	1.01695		1.22	2	1.11847	0.143579	0.12837	0.161532
746	P24752	ACAT1 Acetyl-CoA acetyltransferase, mitochondrial	ACAT1	R.QAVLGAGLPISTPC*TTINK.V	0.96	1.62	1.07	0.813559	1.47273	1.07	3	1.11876	0.332278	0.297005	0.161903
1496	P12268	IMPDH2 Inosine-5-monophosphate dehydrogenase 2	IMPDH2	R.VGMGSGSIC*ITQEVLACGRPQATAVYK.V	0.97	1.56		0.822034	1.41818		2	1.12011	0.42154	0.376339	0.163638
882	P49207	RPL34 60S ribosomal protein L34	RPL34	R.AYGGSMC*AK.C	1.17	1.32	1.17	0.991525	1.2	1.17	3	1.12051	0.112705	0.100584	0.164154
611	O75607	NPM3 Nucleoplasmin-3	NPM3	K.LSC*QPMLSLDDFQLQPPVTFR.L	1.5		0.97	1.27119		0.97	2	1.12059	0.212971	0.190052	0.164263
923	Q8TDX7	NEK7 Serine/threonine-protein kinase Nek7	NEK7	R.MHAC*TASS.-	1.23		1.2	1.04237		1.2	2	1.12119	0.111459	0.0994118	0.165026
713	Q15041	ARL6IP1 ADP-ribosylation factor-like protein 6-interacting	ARL6IP1	R.FHEIC*SNLVK.T	1.42		1.04	1.20339		1.04	2	1.12169	0.115534	0.103	0.16568
795	Q99439	CNN2 Calponin-2	CNN2	K.LGTDKC*DNSSMSLQMGYTQGANQSGQVFGLGR.Q	1.35		1.1	1.14407		1.1	2	1.12203	0.0311606	0.0277716	0.166116
894	O75390	CS Citrate synthase, mitochondrial	CS	K.LPC*VAAK.I	1.25	1.25	1.18	1.05932	1.13636	1.18	3	1.12523	0.0611047	0.0543043	0.170218
937	Q9BWD1	ACAT2 Acetyl-CoA acetyltransferase, cytosolic	ACAT2	R.QASVGAGIPYSVPAWSC*QMICGSGLK.A	1.23		1.21	1.04237		1.21	2	1.12619	0.11853	0.105249	0.171446
1039	Q9P2N5	RBM27 RNA-binding protein 27	RBM27	K.TPSKLC*SGSK.S	1.09		1.33	0.923729		1.33	2	1.12686	0.287277	0.254935	0.172314
910	P52272	HNRNPM Heterogeneous nuclear ribonucleoprotein M	HNRNPM	K.DKFNEC*GHVLYADIK.M	1.26		1.19	1.0678		1.19	2	1.1289	0.0864108	0.0765444	0.174916
816	P57721	PCBP3 Poly(rC)-binding protein 3	PCBP3	R.INISEGNC*PER.I	1.42	1.17	1.12	1.20339	1.06364	1.12	3	1.12901	0.0703109	0.0622767	0.175057
1368	P62333	PSMC6 26S proteasome regulatory subunit 10B	PSMC6	R.NVC*TEAGMFAIR.A	1.71	0.89		1.44915	0.809091		2	1.12912	0.452592	0.400835	0.175201
796	Q99439	CNN2 Calponin-2	CNN2	K.AGQC*VIGLQMGTNK.C	1.37		1.1	1.16102		1.1	2	1.13051	0.0431455	0.0381647	0.176972
732	P49589	CARS Cysteine--tRNA ligase, cytoplasmic	CARS	R.VQPQWSPPAGTQPC*R.L	1.43		1.05	1.21186		1.05	2	1.13093	0.114455	0.101204	0.177512
887	Q9UBB4	ATXN10 Ataxin-10	ATXN10	R.HAELIASTFVDQC*K.T	1.29		1.17	1.09322		1.17	2	1.13161	0.0542914	0.0479771	0.178377
853	P62910	RPL32 60S ribosomal protein L32	RPL32	K.ELEVLLMC*NK.S	1.12	1.43	1.15	0.949153	1.3	1.15	3	1.13305	0.176037	0.155365	0.180213
1062	P26196	DDX6 Probable ATP-dependent RNA helicase DDX6	DDX6	K.GNEFEDYC*LKR.E	1.28	1.05	1.36	1.08475	0.954545	1.36	3	1.1331	0.207007	0.182691	0.180271
947	O43684	BUB3 Mitotic checkpoint protein BUB3	BUB3	R.TPC*NAGTFSQPEK.V	1.21	1.27	1.22	1.02542	1.15455	1.22	3	1.13332	0.099009	0.0873616	0.180559
754	P60866	RPS20 40S ribosomal protein S20	RPS20	K.TPC*GEGSK.T	1.15	1.48	1.08	0.974576	1.34545	1.08	3	1.13334	0.191107	0.168622	0.180585
846	Q9BV86	NTMT1 N-terminal Xaa-Pro-Lys N-methyltransferase 1	NTMT1	R.IIC*SAGLSLLAEER.Q	1.33		1.14	1.12712		1.14	2	1.13356	0.00910849	0.0080353	0.18086
1076	O15042	U2SURP U2 snRNP-associated SURP motif-containing protein	U2SURP	R.ESLC*DSPHQNLSRPLLENK.L	1.06		1.37	0.898305		1.37	2	1.13415	0.333539	0.294086	0.181615
938	P40227	CCT6A T-complex protein 1 subunit zeta	CCT6A	K.NAIDDGC*VVPGAGAVEVAMAEALIK.H	1.25		1.21	1.05932		1.21	2	1.13466	0.106545	0.0939007	0.182261
651	O43865	AHCYL1 S-adenosylhomocysteine hydrolase-like protein 1	AHCYL1	K.AGKLC*VPAMNVNDSVTK.Q	1.54	1.21	1	1.30508	1.1	1	3	1.13503	0.155529	0.137027	0.182728
869	P63244	RACK1 Receptor of activated protein C kinase 1	RACK1	K.HLYTLDGGDIINALC*FSPNR.Y	1.31		1.16	1.11017		1.16	2	1.13508	0.0352355	0.0310422	0.1828
870	Q9UJW0	DCTN4 Dynactin subunit 4	DCTN4	R.LLQPDFQPVC*ASQLYPR.H	1.31		1.16	1.11017		1.16	2	1.13508	0.0352355	0.0310422	0.1828
605	P22102	GART Trifunctional purine biosynthetic protein adenosin	GART	K.QVLVAPGNAGTAC*SEK.I	1.58	1.21	0.97	1.33898	1.1	0.97	3	1.13633	0.187155	0.164701	0.184379
612	P47756	CAPZB F-actin-capping protein subunit beta	CAPZB	K.DETVSDC*SPHIANIGR.L	1.54		0.97	1.30508		0.97	2	1.13754	0.236941	0.208292	0.18592
1066	Q9BUL9	RPP25 Ribonuclease P protein subunit p25	RPP25	R.SEEAPAGC*GAEGGGPGSGPFADLAPGAVHMR.V	1.08		1.36	0.915254		1.36	2	1.13763	0.314483	0.276437	0.186028
1077	Q9Y4P3	TBL2 Transducin beta-like protein 2	TBL2	R.FLASC*GDR.A	1.07		1.37	0.90678		1.37	2	1.13839	0.327546	0.287728	0.186995
385	P55265	ADAR Double-stranded RNA-specific adenosine deaminase	ADAR	K.SPVTTLLEC*MHK.L	1.72		0.82	1.45763		0.82	2	1.13881	0.45087	0.395912	0.187532
648	P11413	G6PD Glucose-6-phosphate 1-dehydrogenase	G6PD	R.TQVC*GILR.E	1.52		0.99	1.28814		0.99	2	1.13907	0.210814	0.185076	0.187854
871	P52564	MAP2K6 Dual specificity mitogen-activated protein kinase	MAP2K6	K.TIDAGC*KPYMAPER.I	1.32		1.16	1.11864		1.16	2	1.13932	0.0292431	0.0256671	0.188176
709	P04899	GNAI2 Guanine nucleotide-binding protein G(i) subunit al	GNAI2	K.NNLKDC*GLF.-	1.52	1.2	1.04	1.28814	1.09091	1.04	3	1.13968	0.131061	0.114998	0.188631
888	P45880	VDAC2 Voltage-dependent anion-selective channel protein	VDAC2	R.PMC*IPPSYADLGK.A	1.31		1.17	1.11017		1.17	2	1.14008	0.0423066	0.0371083	0.189141
762	Q56VL3	OCIAD2 OCIA domain-containing protein 2	OCIAD2	R.HC*LLTCEECK.I	1.42		1.08	1.20339		1.08	2	1.14169	0.0872498	0.0764213	0.191177
724	P28062	PSMB8 Proteasome subunit beta type-8	PSMB8	K.VIEINPYLLGTMSGC*AADCQYWER.L	1.42	1.29	1.05	1.20339	1.17273	1.05	3	1.14204	0.0811692	0.0710739	0.191612
797	P08238	HSP90AB1 Heat shock protein HSP 90-beta	HSP90AB1	R.VFIMDSC*DELIPEYLNFIR.G	1.4		1.1	1.18644		1.1	2	1.14322	0.0611228	0.0534654	0.193103
1008	P78347	GTF2I General transcription factor II-I	GTF2I	R.SILSPGGSC*GPIK.V	1.18		1.29	1		1.29	2	1.145	0.205061	0.179093	0.195348
683	Q5RKV6	EXOSC6 Exosome complex component MTR3	EXOSC6	R.APPGGC*EER.E	1.5		1.02	1.27119		1.02	2	1.14559	0.177616	0.155042	0.196095
911	Q9UHR5	SAP30BP SAP30-binding protein	SAP30BP	R.C*SNHLQDKIQK.L	1.3		1.19	1.10169		1.19	2	1.14585	0.0624411	0.0544934	0.196415
1018	O14980	XPO1 Exportin-1	XPO1	K.TSSDPTC*VEKEK.V	1.16		1.31	0.983051		1.31	2	1.14653	0.231188	0.201642	0.197268
924	Q9Y3B4	SF3B6 Splicing factor 3B subunit 6	SF3B6	K.NACDHLSGFNVC*NR.Y	1.29		1.2	1.09322		1.2	2	1.14661	0.0755046	0.0658503	0.197375
1033	P46734	MAP2K3 Dual specificity mitogen-activated protein kinase	MAP2K3	K.TMDAGC*KPYMAPER.I	1.15		1.32	0.974576		1.32	2	1.14729	0.244251	0.212895	0.198228
798	Q15185	PTGES3 Prostaglandin E synthase 3	PTGES3	K.SKLTFSC*LGGSDNFK.H	1.41		1.1	1.19492		1.1	2	1.14746	0.0671152	0.0584904	0.198441
872	P40227	CCT6A T-complex protein 1 subunit zeta	CCT6A	K.VC*GDSDKGFVVINQK.G	1.34		1.16	1.13559		1.16	2	1.1478	0.0172582	0.0150359	0.198867
972	P13639	EEF2 Elongation factor 2	EEF2	K.STLTDSLVC*K.A	1.38	1.13	1.25	1.16949	1.02727	1.25	3	1.14892	0.112779	0.0981612	0.20028
190	P57764	GSDMD Gasdermin-D	GSDMD	R.C*LHNFLTDGVPAEGAFTEDFQGLR.A	1.91		0.68	1.61864		0.68	2	1.14932	0.663722	0.57749	0.200783
974	Q8IY81	FTSJ3 pre-rRNA processing protein FTSJ3	FTSJ3	K.QQLPQTPPSC*LK.T	1.24		1.25	1.05085		1.25	2	1.15042	0.140822	0.122409	0.202165
1019	P78527	PRKDC DNA-dependent protein kinase catalytic subunit	PRKDC	K.INQVFHGSC*ITEGNELTK.T	1.17		1.31	0.991525		1.31	2	1.15076	0.225196	0.195692	0.20259
733	P62318	SNRPD3 Small nuclear ribonucleoprotein Sm D3	SNRPD3	K.VLHEAEGHIVTC*ETNTGEVYR.G	1.48		1.05	1.25424		1.05	2	1.15212	0.144418	0.12535	0.204289
572	P35579	MYH9 Myosin-9	MYH9	K.KMEDSVGC*LETAEEVK.R		1.49	0.95		1.35455	0.95	2	1.15227	0.286057	0.248254	0.204482
516	P52597	HNRNPF Heterogeneous nuclear ribonucleoprotein F	HNRNPF	R.DLSYC*LSGMYDHR.Y	1.66		0.9	1.40678		0.9	2	1.15339	0.358347	0.310691	0.20588
1009	P49773	HINT1 Histidine triad nucleotide-binding protein 1	HINT1	K.C*AADLGLNK.G	1.21		1.29	1.02542		1.29	2	1.15771	0.187084	0.161598	0.211276
606	Q00610	CLTC Clathrin heavy chain 1	CLTC	K.VIQC*FAETGQVQK.I	1.11	1.72	0.97	0.940678	1.56364	0.97	3	1.1581	0.351507	0.303519	0.211766
912	P45880	VDAC2 Voltage-dependent anion-selective channel protein	VDAC2	K.WC*EYGLTFTEK.W	1.33		1.19	1.12712		1.19	2	1.15856	0.0444638	0.0383786	0.212332
763	Q99832	CCT7 T-complex protein 1 subunit eta	CCT7	K.C*AMTALSSK.L	1.46		1.08	1.23729		1.08	2	1.15864	0.11122	0.0959911	0.212437
983	P31689	DNAJA1 DnaJ homolog subfamily A member 1	DNAJA1	K.GAVEC*CPNCR.G	1.32	1.21	1.26	1.11864	1.1	1.26	3	1.15955	0.087492	0.0754535	0.213563
836	Q9BXP5	SRRT Serrate RNA effector molecule homolog	SRRT	R.LREC*ELSPGVNR.D	1.41		1.13	1.19492		1.13	2	1.16246	0.045902	0.039487	0.217178
653	P30050	RPL12 60S ribosomal protein L12	RPL12	R.C*TGGEVGATSALAPK.I	1.51	1.33	1	1.27966	1.20909	1	3	1.16292	0.145436	0.125061	0.217749
364	B5ME19	EIF3CL Eukaryotic translation initiation factor 3 subunit	EIF3CL	K.TC*HSFIINEK.M	0.92	2.09	0.81	0.779661	1.9	0.81	3	1.16322	0.63825	0.548692	0.218124
985	P26368	U2AF2 Splicing factor U2AF 65 kDa subunit	U2AF2	K.SIEIPRPVDGVEVPGC*GK.I	1.26		1.26	1.0678		1.26	2	1.1639	0.135908	0.11677	0.218965
558	P08559	PDHA1 Pyruvate dehydrogenase E1 component subunit alpha,	PDHA1	R.FAAAYC*R.S	1.65		0.93	1.39831		0.93	2	1.16415	0.331142	0.284449	0.21928
799	Q96Q11	TRNT1 CCA tRNA nucleotidyltransferase 1, mitochondrial	TRNT1	K.YQGEHC*LLK.E	1.45		1.1	1.22881		1.1	2	1.16441	0.0910849	0.0782243	0.219595
994	P46776	RPL27A 60S ribosomal protein L27a	RPL27A	K.IKSVGGAC*VLVA.-	1.25		1.27	1.05932		1.27	2	1.16466	0.148972	0.12791	0.21991
823	Q9ULA0	DNPEP Aspartyl aminopeptidase	DNPEP	R.ISASC*QHPTAFEEAIPK.S	1.43		1.12	1.21186		1.12	2	1.16593	0.0649579	0.0557133	0.221484
1063	Q00013	MPP1 55 kDa erythrocyte membrane protein	MPP1	R.VASMAQSAPSEAPSC*SPFGK.K		1.07	1.36		0.972727	1.36	2	1.16636	0.273843	0.234784	0.222018
925	Q99714	HSD17B10 3-hydroxyacyl-CoA dehydrogenase type-2	HSD17B10	R.VDVAVNC*AGIAVASK.T	1.34		1.2	1.13559		1.2	2	1.1678	0.0455425	0.0389986	0.223789
858	P25205	MCM3 DNA replication licensing factor MCM3	MCM3	R.SVHYC*PATK.K	1.4		1.15	1.18644		1.15	2	1.16822	0.0257675	0.022057	0.224312
832	P62195	PSMC5 26S proteasome regulatory subunit 8	PSMC5	K.FVVDVDKNIDINDVTPNC*R.V		1.33	1.13		1.20909	1.13	2	1.16955	0.0559257	0.0478183	0.225948
1089	P34932	HSPA4 Heat shock 70 kDa protein 4	HSPA4	R.WNSPAEEGSSDC*EVFSK.N	1.12		1.39	0.949153		1.39	2	1.16958	0.311726	0.266529	0.225986
889	Q16186	ADRM1 Proteasomal ubiquitin receptor ADRM1	ADRM1	R.TSGNVEDDLIIFPDDCEFKRVPQC*PSGR.V	1.38		1.17	1.16949		1.17	2	1.16975	0.000359546	0.000307371	0.226195
743	P53990	IST1 IST1 homolog	IST1	K.IVADQLC*AK.Y	1.51		1.06	1.27966		1.06	2	1.16983	0.155324	0.132775	0.2263
661	Q9BXJ9	NAA15 N-alpha-acetyltransferase 15, NatA auxiliary subun	NAA15	R.LFNTAVC*ESK.D	1.98	0.91	1.01	1.67797	0.827273	1.01	3	1.17175	0.447818	0.38218	0.22866
785	Q14232	EIF2B1 Translation initiation factor eIF-2B subunit alpha	EIF2B1	K.IGTNQMAVC*AK.A	1.89	0.91	1.1	1.60169	0.827273	1.1	3	1.17632	0.392812	0.333932	0.234284
913	P63208	SKP1 S-phase kinase-associated protein 1	SKP1	K.GLLDVTC*K.T	1.38		1.19	1.16949		1.19	2	1.17975	0.0145017	0.0122922	0.238476
689	Q99832	CCT7 T-complex protein 1 subunit eta	CCT7	R.QLC*DNAGFDATNILNK.L	1.58	1.29	1.03	1.33898	1.17273	1.03	3	1.18057	0.154641	0.130988	0.239484
1175	P62333	PSMC6 26S proteasome regulatory subunit 10B	PSMC6	R.AVASQLDC*NFLK.V	0.97		1.54	0.822034		1.54	2	1.18102	0.507679	0.429866	0.24003
1075	P45880	VDAC2 Voltage-dependent anion-selective channel protein	VDAC2	K.WCEYGLTFTEKWNTDNTLGTEIAIEDQIC*QGLK.L	1.58	0.92	1.37	1.33898	0.836364	1.37	3	1.18178	0.299543	0.253467	0.240964
1051	P35611	ADD1 Alpha-adducin	ADD1	K.TAGPQSQVLC*GVVMDR.S	1.21		1.34	1.02542		1.34	2	1.18271	0.222439	0.188075	0.242099
966	P62913	RPL11 60S ribosomal protein L11	RPL11	K.IAVHC*TVR.G	1.34	1.29	1.24	1.13559	1.17273	1.24	3	1.18277	0.0529234	0.0447452	0.242174
1463	P52272	HNRNPM Heterogeneous nuclear ribonucleoprotein M	HNRNPM	K.GC*GVVKFESPEVAER.A	1.4	1.3		1.18644	1.18182		2	1.18413	0.0032686	0.00276034	0.243827
881	P53396	ACLY ATP-citrate synthase	ACLY	K.AISEQTGKELLYKFIC*TTSAIQNR.F	1.45	1.27	1.17	1.22881	1.15455	1.17	3	1.18445	0.0391868	0.0330843	0.244221
738	P10599	TXN Thioredoxin	TXN	K.C*MPTFQFFK.K	1.52	1.33	1.06	1.28814	1.20909	1.06	3	1.18574	0.115846	0.0976993	0.24579
899	Q9BW61	DDA1 DET1- and DDB1-associated protein 1	DDA1	R.FHADSVC*K.A	1.41		1.18	1.19492		1.18	2	1.18746	0.0105467	0.00888173	0.247876
905	P23528	CFL1 Cofilin-1	CFL1	K.HELQANC*YEEVK.D	1.48	1.23	1.19	1.25424	1.11818	1.19	3	1.18747	0.0680629	0.0573174	0.247895
975	P08133	ANXA6 Annexin A6	ANXA6	R.QRQEVC*QSYK.S	1.33		1.25	1.12712		1.25	2	1.18856	0.0868902	0.0731055	0.249214
714	Q96GX9	APIP Methylthioribulose-1-phosphate dehydratase	APIP	R.C*GAQDKEHPR.Y	1.58		1.04	1.33898		1.04	2	1.18949	0.211413	0.177734	0.250345
553	Q01082	SPTBN1 Spectrin beta chain, non-erythrocytic 1	SPTBN1	K.FATDGEGYKPC*DPQVIR.D	1.88	1.15	0.93	1.59322	1.04545	0.93	3	1.18956	0.354316	0.297855	0.250426
810	Q14181	POLA2 DNA polymerase alpha subunit B	POLA2	K.VLGC*PEALTGSYK.S	1.5		1.11	1.27119		1.11	2	1.19059	0.113976	0.0957305	0.251681
789	P63244	RACK1 Receptor of activated protein C kinase 1	RACK1	K.YTVQDESHSEWVSC*VR.F	1.17	1.63	1.1	0.991525	1.48182	1.1	3	1.19111	0.257533	0.216212	0.252312
432	P27708	CAD CAD protein	CAD	K.VHVDC*MTSQK.L	1.38	1.71	0.85	1.16949	1.55455	0.85	3	1.19135	0.352781	0.29612	0.252592
1067	P30153	PPP2R1A Serine/threonine-protein phosphatase 2A 65 kDa reg	PPP2R1A	R.LNIISNLDC*VNEVIGIR.Q	1.21		1.36	1.02542		1.36	2	1.19271	0.236581	0.198356	0.254246
1054	Q52LJ0	FAM98B Protein FAM98B	FAM98B	R.INDALSC*EYECR.R		1.14	1.35		1.03636	1.35	2	1.19318	0.221774	0.185868	0.254814
927	P49591	SARS Serine--tRNA ligase, cytoplasmic	SARS	K.YAGLSTC*FR.Q	1.4		1.2	1.18644		1.2	2	1.19322	0.00958789	0.0080353	0.25486
926	Q9BZE1	MRPL37 39S ribosomal protein L37, mitochondrial	MRPL37	R.NHIENQDEC*VLNVISHAR.L	1.4		1.2	1.18644		1.2	2	1.19322	0.00958789	0.0080353	0.25486
778	P47897	QARS Glutamine--tRNA ligase	QARS	R.GLAYVC*HQR.G	1.53		1.09	1.29661		1.09	2	1.19331	0.146095	0.122429	0.254963
932	O00299	CLIC1 Chloride intracellular channel protein 1	CLIC1	K.AGSDGAKIGNC*PFSQR.L	1.37	1.33	1.21	1.16102	1.20909	1.21	3	1.19337	0.0280216	0.0234811	0.255041
1491	P63244	RACK1 Receptor of activated protein C kinase 1	RACK1	K.AEPPQC*TSLAWSADGQTLFAGYTDNLVR.V	1.19	1.52		1.00847	1.38182		2	1.19515	0.263994	0.220888	0.257187
890	O15355	PPM1G Protein phosphatase 1G	PPM1G	R.GTEAGQVGEPGIPTGEAGPSC*SSASDKLPR.V	1.44		1.17	1.22034		1.17	2	1.19517	0.035595	0.0297824	0.257215
891	O15372	EIF3H Eukaryotic translation initiation factor 3 subunit	EIF3H	K.LMEVC*KEKDFSPEALKK.A	1.44		1.17	1.22034		1.17	2	1.19517	0.035595	0.0297824	0.257215
958	P61247	RPS3A 40S ribosomal protein S3a	RPS3A	K.FKLITEDVQGKNC*LTNFHGMDLTR.D	1.37		1.23	1.16102		1.23	2	1.19551	0.0487784	0.0408014	0.257624
895	Q92499	DDX1 ATP-dependent RNA helicase DDX1	DDX1	R.GKGC*YNTR.L	1.19	1.54	1.18	1.00847	1.4	1.18	3	1.19616	0.196262	0.164077	0.258408
804	P61978	HNRNPK Heterogeneous nuclear ribonucleoprotein K	HNRNPK	K.GSDFDC*ELR.L	1.5	1.33	1.11	1.27119	1.20909	1.11	3	1.19676	0.0812977	0.0679316	0.259133
873	P17987	TCP1 T-complex protein 1 subunit alpha	TCP1	K.VLC*ELADLQDKEVGDGTTSVVIIAAELLK.N	1.46		1.16	1.23729		1.16	2	1.19864	0.054651	0.045594	0.261403
811	Q7L2H7	EIF3M Eukaryotic translation initiation factor 3 subunit	EIF3M	K.VAASC*GAIQYIPTELDQVRK.W	1.52		1.11	1.28814		1.11	2	1.19907	0.125961	0.105049	0.261913
659	Q96EL3	MRPL53 39S ribosomal protein L53, mitochondrial	MRPL53	R.VQFC*PFEK.N	1.65		1	1.39831		1	2	1.19915	0.281644	0.234869	0.262015
918	Q15185	PTGES3 Prostaglandin E synthase 3	PTGES3	K.HLNEIDLFHC*IDPNDSK.H	1.51	1.23	1.2	1.27966	1.11818	1.2	3	1.19928	0.080742	0.0673253	0.26217
959	P14866	HNRNPL Heterogeneous nuclear ribonucleoprotein L	HNRNPL	K.LC*FSTAQHAS.-	1.38		1.23	1.16949		1.23	2	1.19975	0.042786	0.0356625	0.262729
1390	P40925	MDH1 Malate dehydrogenase, cytoplasmic	MDH1	K.VIVVGNPANTNC*LTASK.S	1.78	0.99		1.50847	0.9		2	1.20424	0.430256	0.357285	0.26812
764	O94855	SEC24D Protein transport protein Sec24D	SEC24D	K.NC*VLLSRPEISTDER.A	1.57		1.08	1.33051		1.08	2	1.20525	0.177136	0.14697	0.269338
779	Q5T160	RARS2 Probable arginine--tRNA ligase, mitochondrial	RARS2	R.AIAC*QLSR.V	1.56		1.09	1.32203		1.09	2	1.20602	0.164073	0.136045	0.27025
951	P82912	MRPS11 28S ribosomal protein S11, mitochondrial	MRPS11	K.ASHNNTQIQVVSASNEPLAFASC*GTEGFR.N	1.41		1.22	1.19492		1.22	2	1.20746	0.0177376	0.01469	0.271973
749	P35579	MYH9 Myosin-9	MYH9	K.ADFC*IIHYAGK.V	1.59		1.07	1.34746		1.07	2	1.20873	0.196192	0.162313	0.273491
533	Q9Y5M8	SRPRB Signal recognition particle receptor subunit beta	SRPRB	R.DTQTSITDSC*AVYR.V	1.78		0.91	1.50847		0.91	2	1.20924	0.423185	0.349961	0.274097
982	Q13148	TARDBP TAR DNA-binding protein 43	TARDBP	R.NPVSQC*MR.G	1.52	1.19	1.26	1.28814	1.08182	1.26	3	1.20998	0.111883	0.0924667	0.274989
1048	P55212	CASP6 Caspase-6	CASP6	R.GTC*ADRDNLTR.R		1.19	1.34		1.08182	1.34	2	1.21091	0.182562	0.150765	0.276091
989	P78371	CCT2 T-complex protein 1 subunit beta	CCT2	R.SLHDALC*VLAQTVK.D		1.27	1.27		1.15455	1.27	2	1.21227	0.0816387	0.0673435	0.277714
1507	O00429	DNM1L Dynamin-1-like protein	DNM1L	R.C*VELVHEEMQR.I	1.05	1.69		0.889831	1.53636		2	1.2131	0.457168	0.37686	0.278695
948	Q9NYZ3	GTSE1 G2 and S phase-expressed protein 1	GTSE1	R.AQRPQSC*TSVGR.V	1.36	1.4	1.22	1.15254	1.27273	1.22	3	1.21509	0.0602427	0.0495788	0.281063
960	P61221	ABCE1 ATP-binding cassette sub-family E member 1	ABCE1	R.YC*ANAFK.L	1.42		1.23	1.20339		1.23	2	1.21669	0.0188162	0.015465	0.282967
824	Q14197	MRPL58 Peptidyl-tRNA hydrolase ICT1, mitochondrial	MRPL58	R.LTISYC*R.S	1.55		1.12	1.31356		1.12	2	1.21678	0.136867	0.112483	0.283068
1068	Q96KB5	PBK Lymphokine-activated killer T-cell-originated prot	PBK	K.SVLC*STPTINIPASPFMQK.L	1.27		1.36	1.07627		1.36	2	1.21814	0.200627	0.1647	0.284675
1171	Q29RF7	PDS5A Sister chromatid cohesion protein PDS5 homolog A	PDS5A	K.SALC*NADSPKDPVLPMK.F	1.07		1.53	0.90678		1.53	2	1.21839	0.440683	0.361693	0.284976
919	B2RPK0	HMGB1P1 Putative high mobility group protein B1-like 1	HMGB1P1	K.MSSYAFFVQTC*R.E	1.57	1.24	1.2	1.33051	1.12727	1.2	3	1.21926	0.102978	0.0844592	0.286006
812	P49427	CDC34 Ubiquitin-conjugating enzyme E2 R1	CDC34	R.DGVKVPTTLAEYC*VK.T	1.57		1.11	1.33051		1.11	2	1.22025	0.155923	0.127779	0.287182
973	O15067	PFAS Phosphoribosylformylglycinamidine synthase	PFAS	K.FC*DNSSAIQGK.E	1.59	1.17	1.25	1.34746	1.06364	1.25	3	1.22036	0.144213	0.118172	0.287312
961	P13807	GYS1 Glycogen [starch] synthase, muscle	GYS1	R.ASC*TSSTSGSKR.N	1.43		1.23	1.21186		1.23	2	1.22093	0.0128238	0.0105033	0.287983
1504	P09651	HNRNPA1 Heterogeneous nuclear ribonucleoprotein A1	HNRNPA1	K.YHTVNGHNC*EVR.K	1.16	1.61		0.983051	1.46364		2	1.22334	0.339825	0.277784	0.29083
939	Q6I9Y2	THOC7 THO complex subunit 7 homolog	THOC7	K.IYKEIEC*SIAGAHEK.I	1.46		1.21	1.23729		1.21	2	1.22364	0.0192956	0.015769	0.291184
892	P54105	CLNS1A Methylosome subunit pICln	CLNS1A	R.DRSDC*LGEHLYVMVNAK.F	1.51		1.17	1.27966		1.17	2	1.22483	0.077542	0.0633084	0.292582
1140	O15235	MRPS12 28S ribosomal protein S12, mitochondrial	MRPS12	R.GKYDC*GHVQK.K	1.17		1.46	0.991525		1.46	2	1.22576	0.331262	0.270249	0.29368
765	Q9Y266	NUDC Nuclear migration protein nudC	NUDC	R.WTQTLSELDLAVPFC*VNFR.L	1.62		1.08	1.37288		1.08	2	1.22644	0.207098	0.168861	0.294477
1093	P49411	TUFM Elongation factor Tu, mitochondrial	TUFM	K.NMITGTAPLDGC*ILVVAANDGPMPQTR.E	1.36	1.24	1.4	1.15254	1.12727	1.4	3	1.22661	0.150695	0.122855	0.294671
1069	P08670	VIM Vimentin	VIM	R.QVQSLTC*EVDALKGTNESLER.Q	1.29		1.36	1.09322		1.36	2	1.22661	0.188642	0.153791	0.294677
847	P48047	ATP5O ATP synthase subunit O, mitochondrial	ATP5O	R.GEVPC*TVTSASPLEEATLSELK.T	1.55		1.14	1.31356		1.14	2	1.22678	0.122725	0.100038	0.294876
697	Q00403	GTF2B Transcription initiation factor IIB	GTF2B	R.TFKEIC*AVSR.I	1.68		1.03	1.42373		1.03	2	1.22686	0.278408	0.226927	0.294976
1119	P00505	GOT2 Aspartate aminotransferase, mitochondrial	GOT2	R.VGAFTMVC*K.D	1.21		1.43	1.02542		1.43	2	1.22771	0.286079	0.233018	0.295972
1090	P26368	U2AF2 Splicing factor U2AF 65 kDa subunit	U2AF2	K.YC*DPDSYHRR.D	1.27		1.39	1.07627		1.39	2	1.23314	0.22184	0.179899	0.302331
1152	P36873	PPP1CC Serine/threonine-protein phosphatase PP1-gamma cat	PPP1CC	R.GNHEC*ASINR.I	1.18		1.47	1		1.47	2	1.235	0.33234	0.269101	0.304511
859	Q9NQ88	TIGAR Fructose-2,6-bisphosphatase TIGAR	TIGAR	K.AAREEC*PVFTPPGGETLDQVK.M	1.56		1.15	1.32203		1.15	2	1.23602	0.121646	0.098418	0.305699
1040	Q7L2J0	MEPCE 7SK snRNA methylphosphate capping enzyme	MEPCE	R.SC*FPASLTASR.G	1.35		1.33	1.14407		1.33	2	1.23703	0.131474	0.106282	0.306885
1015	P26599	PTBP1 Polypyrimidine tract-binding protein 1	PTBP1	K.LSLDGQNIYNAC*CTLR.I	1.86	0.92	1.3	1.57627	0.836364	1.3	3	1.23754	0.373887	0.30212	0.307481
1134	O15144	ARPC2 Actin-related protein 2/3 complex subunit 2	ARPC2	R.NC*FASVFEK.Y	1.21		1.45	1.02542		1.45	2	1.23771	0.300221	0.242561	0.307675
1141	P63244	RACK1 Receptor of activated protein C kinase 1	RACK1	R.YWLC*AATGPSIK.I	1.2		1.46	1.01695		1.46	2	1.23847	0.313284	0.25296	0.308564
1058	Q16630	CPSF6 Cleavage and polyadenylation specificity factor su	CPSF6	R.ELHGQNPVVTPC*NK.Q	1.33		1.35	1.12712		1.35	2	1.23856	0.157601	0.127245	0.308663
967	Q92598	HSPH1 Heat shock protein 105 kDa	HSPH1	K.KLMSSNSTDLPLNIEC*FMNDKDVSGK.M	1.46		1.24	1.23729		1.24	2	1.23864	0.00191758	0.00154813	0.308762
818	P48735	IDH2 Isocitrate dehydrogenase [NADP], mitochondrial	IDH2	K.DLAGC*IHGLSNVK.L	1.24	1.7	1.12	1.05085	1.54545	1.12	3	1.23877	0.26784	0.216215	0.308905
933	P61978	HNRNPK Heterogeneous nuclear ribonucleoprotein K	HNRNPK	K.IIPTLEEGLQLPSPTATSQLPLESDAVEC*LNYQHYK.G	1.5	1.37	1.21	1.27119	1.24545	1.21	3	1.24221	0.0307217	0.0247314	0.312913
1020	Q86W42	THOC6 THO complex subunit 6 homolog	THOC6	K.AQVPGSSPGLLSLSLNQQPAAPEC*K.V	1.39		1.31	1.17797		1.31	2	1.24398	0.0933621	0.0750509	0.314967
1021	Q9BPW8	NIPSNAP1 Protein NipSnap homolog 1	NIPSNAP1	R.FSGGYPALMDC*MNK.L	1.39		1.31	1.17797		1.31	2	1.24398	0.0933621	0.0750509	0.314967
928	P27361	MAPK3 Mitogen-activated protein kinase 3	MAPK3	K.ISPFEHQTYC*QR.T	1.52		1.2	1.28814		1.2	2	1.24407	0.0623213	0.0500948	0.315065
940	P67936	TPM4 Tropomyosin alpha-4 chain	TPM4	K.EENVGLHQTLDQTLNELNC*I.-	1.51		1.21	1.27966		1.21	2	1.24483	0.0492578	0.0395699	0.315949
995	Q7Z2W4	ZC3HAV1 Zinc finger CCCH-type antiviral protein 1	ZC3HAV1	R.SC*TPSPDQISHR.A	1.44		1.27	1.22034		1.27	2	1.24517	0.0351156	0.0282015	0.316342
1127	Q9NTK5	OLA1 Obg-like ATPase 1	OLA1	K.STFFNVLTNSQASAENFPFC*TIDPNESR.V	1.24		1.44	1.05085		1.44	2	1.24542	0.275172	0.220947	0.316637
968	P04083	ANXA1 Annexin A1	ANXA1	K.MYGISLC*QAILDETKGDYEK.I	1.48		1.24	1.25424		1.24	2	1.24712	0.0100673	0.00807243	0.318599
1183	Q8IZV5	RDH10 Retinol dehydrogenase 10	RDH10	K.AILTDQPMIC*TPR.L	1.11		1.56	0.940678		1.56	2	1.25034	0.437927	0.350246	0.322319
649	Q13542	EIF4EBP2 Eukaryotic translation initiation factor 4E-bindin	EIF4EBP2	R.TVAISDAAQLPHDYC*TTPGGTLFSTTPGGTR.I	1.79		0.99	1.51695		0.99	2	1.25347	0.372609	0.297261	0.325933
874	P33992	MCM5 DNA replication licensing factor MCM5	MCM5	K.C*NTDQAGRPK.C	1.59		1.16	1.34746		1.16	2	1.25373	0.132553	0.105727	0.326225
946	P17987	TCP1 T-complex protein 1 subunit alpha	TCP1	R.YINENLIVNTDELGRDC*LINAAK.T	1.66	1.25	1.22	1.40678	1.13636	1.22	3	1.25438	0.138448	0.110371	0.326976
1088	P22234	PAICS Multifunctional protein ADE2	PAICS	K.ITSC*IFQLLQEAGIK.T	1.43	1.28	1.39	1.21186	1.16364	1.39	3	1.25517	0.119233	0.0949936	0.327879
1016	O60763	USO1 General vesicular transport factor p115	USO1	K.C*QNEQLQTAVTQQVSQIQQHK.D	1.43		1.3	1.21186		1.3	2	1.25593	0.0623213	0.0496215	0.328759
914	P21333	FLNA Filamin-A	FLNA	K.AHVVPC*FDASK.V	1.56		1.19	1.32203		1.19	2	1.25602	0.0933621	0.0743319	0.328856
931	P61289	PSME3 Proteasome activator complex subunit 3	PSME3	K.RRLDEC*EEAFQGTK.V	1.83	1.11	1.21	1.55085	1.00909	1.21	3	1.25665	0.273874	0.21794	0.329578
1139	P14866	HNRNPL Heterogeneous nuclear ribonucleoprotein L	HNRNPL	K.ASLNGADIYSGC*CTLK.I	1.26	1.37	1.46	1.0678	1.24545	1.46	3	1.25775	0.196391	0.156144	0.330846
996	P50991	CCT4 T-complex protein 1 subunit delta	CCT4	K.AQDIEAGDGTTSVVIIAGSLLDSC*TK.L	1.47		1.27	1.24576		1.27	2	1.25788	0.0171384	0.0136248	0.330996
1049	P55769	SNU13 NHP2-like protein 1	SNU13	K.KLLDLVQQSC*NYK.Q	1.5	1.28	1.34	1.27119	1.16364	1.34	3	1.25827	0.088888	0.0706428	0.331446
952	Q9H7N4	SCAF1 Splicing factor, arginine/serine-rich 19	SCAF1	K.ESAPSSGPPPKPPVSSGSGSSSSSSSC*SSR.K	1.53		1.22	1.29661		1.22	2	1.25831	0.0541716	0.0430512	0.331482
1095	P62910	RPL32 60S ribosomal protein L32	RPL32	K.SYC*AEIAHNVSSK.N	1.29	1.41	1.4	1.09322	1.28182	1.4	3	1.25835	0.154731	0.122964	0.331529
1001	O14980	XPO1 Exportin-1	XPO1	R.QMSVPGIFNPHEIPEEMC*D.-	1.46		1.28	1.23729		1.28	2	1.25864	0.0302018	0.0239955	0.33187
441	Q9HAV7	GRPEL1 GrpE protein homolog 1, mitochondrial	GRPEL1	K.LYGIQAFC*K.D	1.97		0.85	1.66949		0.85	2	1.25975	0.579468	0.459988	0.333133
817	Q9NZL4	HSPBP1 Hsp70-binding protein 1	HSPBP1	R.LLDRDAC*DTVR.V	1.75	1.3	1.12	1.48305	1.18182	1.12	3	1.26162	0.194237	0.153958	0.335281
833	P62249	RPS16 40S ribosomal protein S16	RPS16	K.KTATAVAHC*K.R	1.1	1.9	1.13	0.932203	1.72727	1.13	3	1.26316	0.413923	0.327689	0.337036
1192	P28074	PSMB5 Proteasome subunit beta type-5	PSMB5	K.VIEINPYLLGTMAGGAADC*SFWER.L	1.12		1.58	0.949153		1.58	2	1.26458	0.446077	0.352748	0.338654
1084	P21281	ATP6V1B2 V-type proton ATPase subunit B, brain isoform	ATP6V1B2	R.GPVVLAEDFLDIMGQPINPQC*R.I	1.36		1.38	1.15254		1.38	2	1.26627	0.160837	0.127016	0.340586
813	P55072	VCP Transitional endoplasmic reticulum ATPase	VCP	K.AIANEC*QANFISIK.G	1.68		1.11	1.42373		1.11	2	1.26686	0.22184	0.175109	0.341262
1448	P55060	CSE1L Exportin-2	CSE1L	K.ATIELC*STHANDASALR.I	1.65	1.25		1.39831	1.13636		2	1.26733	0.185221	0.14615	0.341797
962	O14818	PSMA7 Proteasome subunit alpha type-7	PSMA7	R.ARVEC*QSHR.L	1.54		1.23	1.30508		1.23	2	1.26754	0.0530929	0.0418865	0.342034
848	P53582	METAP1 Methionine aminopeptidase 1	METAP1	R.VCETDGC*SSEAK.L	1.65		1.14	1.39831		1.14	2	1.26915	0.182649	0.143914	0.343865
986	Q9UJX3	ANAPC7 Anaphase-promoting complex subunit 7	ANAPC7	K.VRPSTGNSASTPQSQC*LPSEIEVK.Y	1.51		1.26	1.27966		1.26	2	1.26983	0.0139024	0.0109483	0.344636
1085	O00410	IPO5 Importin-5	IPO5	K.TKENVNATENC*ISAVGK.I	1.37		1.38	1.16102		1.38	2	1.27051	0.154844	0.121876	0.345406
1002	Q9Y3F4	STRAP Serine-threonine kinase receptor-associated protei	STRAP	K.IGFPETTEEELEEIASENSDC*IFPSAPDVK.A	1.49		1.28	1.26271		1.28	2	1.27136	0.0122246	0.00961537	0.346368
896	Q86U90	YRDC YrdC domain-containing protein, mitochondrial	YRDC	R.AGAVVAVPTDTLYGLACAASC*SAALR.A	1.32	1.67	1.18	1.11864	1.51818	1.18	3	1.27228	0.21516	0.169114	0.347411
941	Q9ULV4	CORO1C Coronin-1C	CORO1C	K.KC*DLISIPK.K	1.58		1.21	1.33898		1.21	2	1.27449	0.0912048	0.0715617	0.349922
539	P37802	TAGLN2 Transgelin-2	TAGLN2	K.NMAC*VQR.T	2	1.33	0.92	1.69492	1.20909	0.92	3	1.27467	0.391598	0.307215	0.350122
1449	P49721	PSMB2 Proteasome subunit beta type-2	PSMB2	R.RNLADC*LR.S	1.67	1.25		1.41525	1.13636		2	1.27581	0.197205	0.154573	0.351412
1059	Q9UHD1	CHORDC1 Cysteine and histidine-rich domain-containing prot	CHORDC1	K.TTEKKELC*ELKPK.F	1.42		1.35	1.20339		1.35	2	1.27669	0.103669	0.0812011	0.352414
976	Q7L2H7	EIF3M Eukaryotic translation initiation factor 3 subunit	EIF3M	R.LLYEALVDC*KK.S	1.55		1.25	1.31356		1.25	2	1.28178	0.0449432	0.0350631	0.358148
1159	Q6NXE6	ARMC6 Armadillo repeat-containing protein 6	ARMC6	R.SAHRDC*EDVAK.A	1.26		1.5	1.0678		1.5	2	1.2839	0.305614	0.238036	0.360531
1184	P62826	RAN GTP-binding nuclear protein Ran	RAN	R.VC*ENIPIVLCGNK.V	1.19		1.56	1.00847		1.56	2	1.28424	0.389987	0.303672	0.360912
1135	P62191	PSMC1 26S proteasome regulatory subunit 4	PSMC1	K.AIC*TEAGLMALR.E	1.32		1.45	1.11864		1.45	2	1.28432	0.234304	0.182434	0.361007
1032	Q8IUF8	RIOX2 Ribosomal oxygenase 2	RIOX2	K.AKPTGSGKEEGPAPC*K.Q	1.47	1.42	1.32	1.24576	1.29091	1.32	3	1.28556	0.0374069	0.0290978	0.362394
906	P04406	GAPDH Glyceraldehyde-3-phosphate dehydrogenase	GAPDH	K.IISNASC*TTNCLAPLAK.V	1.56	1.48	1.19	1.32203	1.34545	1.19	3	1.28583	0.0838129	0.065182	0.362699
990	P25398	RPS12 40S ribosomal protein S12	RPS12	K.KLGEWVGLC*K.I	1.56	1.4	1.27	1.32203	1.27273	1.27	3	1.28825	0.0292863	0.0227333	0.365417
1022	Q9NSD9	FARSB Phenylalanine--tRNA ligase beta subunit	FARSB	K.TKEYTAC*ELMNIYK.T	1.51		1.31	1.27966		1.31	2	1.29483	0.0214529	0.0165681	0.372763
410	P14678	SNRPB Small nuclear ribonucleoprotein-associated protein	SNRPB	R.C*ILQDGR.I	0.89	2.52	0.84	0.754237	2.29091	0.84	3	1.29505	0.863506	0.666775	0.373006
715	P14618	PKM Pyruvate kinase PKM	PKM	R.GIFPVLC*KDPVQEAWAEDVDLR.V	1.83		1.04	1.55085		1.04	2	1.29542	0.361224	0.278846	0.373424
1492	P60981	DSTN Destrin	DSTN	K.HEC*QANGPEDLNR.A	1.43	1.52		1.21186	1.38182		2	1.29684	0.120175	0.0926678	0.375002
1136	P37108	SRP14 Signal recognition particle 14 kDa protein	SRP14	K.KGTVEGFEPADNKC*LLR.A	1.35		1.45	1.14407		1.45	2	1.29703	0.216327	0.166786	0.375216
578	Q14152	EIF3A Eukaryotic translation initiation factor 3 subunit	EIF3A	K.FC*LQYTR.K	1.94		0.95	1.64407		0.95	2	1.29703	0.49078	0.378386	0.375216
1030	P63208	SKP1 S-phase kinase-associated protein 1	SKP1	K.NDFTEEEEAQVRKENQWC*EEK.-	1.63	1.31	1.32	1.38136	1.19091	1.32	3	1.29742	0.0972103	0.0749257	0.375647
1112	P49458	SRP9 Signal recognition particle 9 kDa protein	SRP9	K.VTDDLVC*LVYK.T	1.29	1.52	1.42	1.09322	1.38182	1.42	3	1.29835	0.178667	0.137611	0.376675
963	Q7RTV0	PHF5A PHD finger-like domain-containing protein 5A	PHF5A	K.CVICDSYVRPC*TLVR.I	1.62		1.23	1.37288		1.23	2	1.30144	0.101032	0.0776312	0.38011
1017	P60709	ACTB Actin, cytoplasmic 1	ACTB	K.QEYDESGPSIVHRKC*F.-	1.54		1.3	1.30508		1.3	2	1.30254	0.00359546	0.00276034	0.38133
1078	P41250	GARS Glycine--tRNA ligase	GARS	R.SC*YDLSCHAR.A	1.46		1.37	1.23729		1.37	2	1.30364	0.0938415	0.071984	0.38255
987	Q7Z4W1	DCXR L-xylulose reductase	DCXR	R.GVPGAIVNVSSQC*SQR.A	1.59		1.26	1.34746		1.26	2	1.30373	0.0618419	0.0474346	0.382644
907	P43034	PAFAH1B1 Platelet-activating factor acetylhydrolase IB subu	PAFAH1B1	K.FILSC*ADDK.T	1.02	2.05	1.19	0.864407	1.86364	1.19	3	1.30601	0.509617	0.390208	0.385171
837	O00154	ACOT7 Cytosolic acyl coenzyme A thioester hydrolase	ACOT7	R.HC*NSQNGER.C	1.75		1.13	1.48305		1.13	2	1.30653	0.249645	0.191075	0.385735
1055	P29401	TKT Transketolase	TKT	R.TVPFC*STFAAFFTR.A	1.77	1.18	1.35	1.5	1.07273	1.35	3	1.30758	0.216773	0.165782	0.386895
1098	P63241	EIF5A Eukaryotic translation initiation factor 5A-1	EIF5A	K.KYEDIC*PSTHNMDVPNIK.R	1.44		1.4	1.22034		1.4	2	1.31017	0.12704	0.0969642	0.389753
1425	Q7Z5K2	WAPL Wings apart-like protein homolog	WAPL	K.KGGVSC*GTSFR.G	1.85	1.16		1.5678	1.05455		2	1.31117	0.362923	0.276793	0.390856
1064	P26641	EEF1G Elongation factor 1-gamma	EEF1G	K.AAAPAPEEEMDEC*EQALAAEPK.A	1.57	1.37	1.36	1.33051	1.24545	1.36	3	1.31199	0.0594763	0.045333	0.391754
1243	P23396	RPS3 40S ribosomal protein S3	RPS3	K.GC*EVVVSGK.L	1.21	1.12	1.9	1.02542	1.01818	1.9	3	1.31454	0.50704	0.385718	0.394553
1224	P21333	FLNA Filamin-A	FLNA	K.C*SGPGLSPGMVR.A	1.53	1.01	1.74	1.29661	0.918182	1.74	3	1.31826	0.411337	0.312029	0.398639
1105	P62424	RPL7A 60S ribosomal protein L7a	RPL7A	K.TC*TTVAFTQVNSEDKGALAK.L	1.45		1.41	1.22881		1.41	2	1.31941	0.128118	0.0971029	0.399889
1114	P07737	PFN1 Profilin-1	PFN1	K.C*YEMASHLR.R	1.44		1.42	1.22034		1.42	2	1.32017	0.141182	0.106942	0.400723
1115	Q5VV42	CDKAL1 Threonylcarbamoyladenosine tRNA methylthiotransfer	CDKAL1	K.IVLAGC*VPQAQPR.Q	1.44		1.42	1.22034		1.42	2	1.32017	0.141182	0.106942	0.400723
1023	P25205	MCM3 DNA replication licensing factor MCM3	MCM3	R.YVLC*TAPR.A	1.57		1.31	1.33051		1.31	2	1.32025	0.0145017	0.010984	0.400816
780	P11586	MTHFD1 C-1-tetrahydrofolate synthase, cytoplasmic	MTHFD1	R.GDLNDC*FIPCTPK.G	1.84		1.09	1.55932		1.09	2	1.32466	0.331861	0.250525	0.405623
1094	Q9ULV4	CORO1C Coronin-1C	CORO1C	K.SIKDTIC*NQDER.I	1.6	1.34	1.4	1.35593	1.21818	1.4	3	1.3247	0.0948464	0.0715981	0.405671
1229	Q86WB0	ZC3HC1 Nuclear-interacting partner of ALK	ZC3HC1	R.ARLC*SSSSSDTSSR.S	1.02		1.79	0.864407		1.79	2	1.3272	0.654493	0.493137	0.408389
1142	O14929	HAT1 Histone acetyltransferase type B catalytic subunit	HAT1	K.LCQDLPC*FSR.E	1.41		1.46	1.19492		1.46	2	1.32746	0.187443	0.141205	0.408666
1070	Q9NUU7	DDX19A ATP-dependent RNA helicase DDX19A	DDX19A	K.VLVTTNVC*AR.G	1.53		1.36	1.29661		1.36	2	1.32831	0.0448234	0.0337448	0.409587
1497	P20290	BTF3 Transcription factor BTF3	BTF3	R.ARGGC*PGGEATLSQPPPR.G	1.47	1.56		1.24576	1.41818		2	1.33197	0.121919	0.0915325	0.413564
977	Q9Y490	TLN1 Talin-1	TLN1	K.AGALQC*SPSDAYTKK.E	1.67		1.25	1.41525		1.25	2	1.33263	0.116852	0.0876857	0.414273
1160	P40429	RPL13A 60S ribosomal protein L13a	RPL13A	R.C*EGINISGNFYR.N	1.38		1.5	1.16949		1.5	2	1.33475	0.233705	0.175093	0.416565
1099	P31153	MAT2A S-adenosylmethionine synthase isoform type-2	MAT2A	K.VAC*ETVAK.T	1.5		1.4	1.27119		1.4	2	1.33559	0.0910849	0.0681981	0.417481
1010	P78346	RPP30 Ribonuclease P protein subunit p30	RPP30	R.LTIIVSDPSHC*NVLR.A	1.63		1.29	1.38136		1.29	2	1.33568	0.0645984	0.0483638	0.417572
1143	P50990	CCT8 T-complex protein 1 subunit theta	CCT8	K.AHEILPNLVC*CSAK.N	1.43		1.46	1.21186		1.46	2	1.33593	0.175458	0.131338	0.417847
1176	Q7L1Q6	BZW1 Basic leucine zipper and W2 domain-containing prot	BZW1	K.IQEYC*YDNIHFMK.A	1.34		1.54	1.13559		1.54	2	1.3378	0.285959	0.213754	0.419859
1060	O94925	GLS Glutaminase kidney isoform, mitochondrial	GLS	K.C*VQSNIVLLTQAFR.R	1.57		1.35	1.33051		1.35	2	1.34025	0.0137826	0.0102836	0.422507
1096	Q9ULC4	MCTS1 Malignant T-cell-amplified sequence 1	MCTS1	K.FDEKENVSNC*IQLK.T		1.41	1.4		1.28182	1.4	2	1.34091	0.0835672	0.0623213	0.423211
1182	P28062	PSMB8 Proteasome subunit beta type-8	PSMB8	K.LLSNMMC*QYR.G	1.43	1.38	1.56	1.21186	1.25455	1.56	3	1.34214	0.189878	0.141475	0.424532
1031	Q9NZZ3	CHMP5 Charged multivesicular body protein 5	CHMP5	K.APPPSLTDC*IGTVDSR.A	1.79	1.31	1.32	1.51695	1.19091	1.32	3	1.34262	0.164193	0.122293	0.42505
1440	Q96QR8	PURB Transcriptional activator protein Pur-beta	PURB	R.GGGGGPC*GFQPASR.G	1.85	1.23		1.5678	1.11818		2	1.34299	0.317926	0.23673	0.425448
1111	P60842	EIF4A1 Eukaryotic initiation factor 4A-I	EIF4A1	K.VVMALGDYMGASC*HACIGGTNVR.A	1.61	1.37	1.42	1.36441	1.24545	1.42	3	1.34329	0.0891687	0.066381	0.425768
1199	O94906	PRPF6 Pre-mRNA-processing factor 6	PRPF6	R.AAQDLC*EEALR.H	1.26		1.62	1.0678		1.62	2	1.3439	0.390467	0.290548	0.426424
1038	P17987	TCP1 T-complex protein 1 subunit alpha	TCP1	R.GANDFMC*DEMER.S	1.84	1.26	1.33	1.55932	1.14545	1.33	3	1.34493	0.207337	0.154162	0.427526
1097	P13639	EEF2 Elongation factor 2	EEF2	K.DLEEDHAC*IPIKK.S	1.5	1.5	1.4	1.27119	1.36364	1.4	3	1.34494	0.0664106	0.0493781	0.427543
1126	P14866	HNRNPL Heterogeneous nuclear ribonucleoprotein L	HNRNPL	K.LNVCVSKQPAIMPGQSYGLEDGSC*SYKDFSESR.N	1.54	1.42	1.44	1.30508	1.29091	1.44	3	1.34533	0.0822913	0.0611681	0.427961
1024	P78371	CCT2 T-complex protein 1 subunit beta	CCT2	R.VPDHHPC*.-	1.63		1.31	1.38136		1.31	2	1.34568	0.0504563	0.0374951	0.428333
1137	P46459	NSF Vesicle-fusing ATPase	NSF	K.GILLYGPPGC*GK.T	1.47		1.45	1.24576		1.45	2	1.34788	0.144418	0.107144	0.430694
1144	P11766	ADH5 Alcohol dehydrogenase class-3	ADH5	K.IIATAVC*HTDAYTLSGADPEGCFPVILGHEGAGIVESVGEGVTK.L	1.46		1.46	1.23729		1.46	2	1.34864	0.157481	0.11677	0.43151
1071	Q14151	SAFB2 Scaffold attachment factor B2	SAFB2	R.KFDFDAC*NEVPPAPK.E	1.58		1.36	1.33898		1.36	2	1.34949	0.0148612	0.0110125	0.432416
1128	Q9Y6A5	TACC3 Transforming acidic coiled-coil-containing protein	TACC3	R.ALNSASTSLPTSC*PGSEPVPTHQQGQPALELK.E	1.49		1.44	1.26271		1.44	2	1.35136	0.125362	0.0927673	0.434408
1153	Q99436	PSMB7 Proteasome subunit beta type-7	PSMB7	R.ATEGMVVADKNC*SK.I	1.36	1.57	1.48	1.15254	1.42727	1.48	3	1.35327	0.175824	0.129925	0.436452
1003	P61247	RPS3A 40S ribosomal protein S3a	RPS3A	K.AC*QSIYPLHDVFVR.K	1.7		1.28	1.44068		1.28	2	1.36034	0.113616	0.0835207	0.443966
1188	Q13888	GTF2H2 General transcription factor IIH subunit 2	GTF2H2	R.AKYC*ELPVECK.I	1.69	1.19	1.57	1.4322	1.08182	1.57	3	1.36134	0.251687	0.184882	0.445028
949	P56537	EIF6 Eukaryotic translation initiation factor 6	EIF6	R.ASFENNCEIGC*FAK.L		1.66	1.22		1.50909	1.22	2	1.36455	0.204418	0.149807	0.44842
1056	O95861	BPNT1 3(2),5-bisphosphate nucleotidase 1	BPNT1	K.TC*ATDLQTK.A	1.7	1.44	1.35	1.44068	1.30909	1.35	3	1.36659	0.0673439	0.0492788	0.45058
1212	Q12765	SCRN1 Secernin-1	SCRN1	K.TQSPC*FGDDDPAKKEPR.F	1.25		1.68	1.05932		1.68	2	1.36966	0.438886	0.320434	0.453819
1166	P52272	HNRNPM Heterogeneous nuclear ribonucleoprotein M	HNRNPM	K.AC*QIFVR.N	1.44		1.52	1.22034		1.52	2	1.37017	0.211892	0.154647	0.454354
1234	P51570	GALK1 Galactokinase	GALK1	R.RQC*EEVAR.A		1.02	1.82		0.927273	1.82	2	1.37364	0.631254	0.459549	0.458
1116	Q13084	MRPL28 39S ribosomal protein L28, mitochondrial	MRPL28	K.TPKEDLC*SK.F	1.57		1.42	1.33051		1.42	2	1.37525	0.0632801	0.0460134	0.459698
1120	P21964	COMT Catechol O-methyltransferase	COMT	K.IVDAVIQEHQPSVLLELGAYC*GYSAVR.M	1.56		1.43	1.32203		1.43	2	1.37602	0.0763436	0.0554816	0.460498
1133	P00338	LDHA L-lactate dehydrogenase A chain	LDHA	K.NRVIGSGC*NLDSAR.F	1.6	1.46	1.45	1.35593	1.32727	1.45	3	1.37773	0.0642029	0.0466004	0.462298
1477	P62913	RPL11 60S ribosomal protein L11	RPL11	K.LC*LNIC*VGESGDR.L	1.75	1.4		1.48305	1.27273		2	1.37789	0.148721	0.107934	0.46246
1086	O95801	TTC4 Tetratricopeptide repeat protein 4	TTC4	R.LSEAAC*EDEDSASEGLGELFLDGLSTENPHGAR.L	1.63		1.38	1.38136		1.38	2	1.38068	0.000958789	0.000694433	0.465377
1072	P49321	NASP Nuclear autoantigenic sperm protein	NASP	R.KPTDGASSSNC*VTDISHLVR.K	1.66		1.36	1.40678		1.36	2	1.38339	0.0330782	0.023911	0.468208
1025	P00492	HPRT1 Hypoxanthine-guanine phosphoribosyltransferase	HPRT1	K.SYC*NDQSTGDIK.V	1.73		1.31	1.4661		1.31	2	1.38805	0.110381	0.079522	0.47306
781	Q12849	GRSF1 G-rich sequence factor 1	GRSF1	R.YIELFLNSC*PK.G	2		1.09	1.69492		1.09	2	1.39246	0.42774	0.307183	0.477633
1000	P14618	PKM Pyruvate kinase PKM	PKM	R.AEGSDVANAVLDGADC*IMLSGETAK.G	1.68	1.63	1.28	1.42373	1.48182	1.28	3	1.39518	0.103893	0.0744658	0.480454
1174	P48643	CCT5 T-complex protein 1 subunit epsilon	CCT5	K.VVNSC*HR.Q	1.61	1.41	1.54	1.36441	1.28182	1.54	3	1.39541	0.131853	0.0944908	0.480687
1041	Q9UL25	RAB21 Ras-related protein Rab-21	RAB21	K.VVLLGEGC*VGK.T	1.74		1.33	1.47458		1.33	2	1.40229	0.102231	0.0729029	0.487783
819	P26599	PTBP1 Polypyrimidine tract-binding protein 1	PTBP1	K.RGSDELFSTC*VTNGPFIMSSNSASAANGNDSK.K	1.53	1.97	1.12	1.29661	1.79091	1.12	3	1.40251	0.347765	0.247959	0.488007
1207	P49458	SRP9 Signal recognition particle 9 kDa protein	SRP9	K.YRHSDGNLC*VK.V	1.37	1.53	1.66	1.16102	1.39091	1.66	3	1.40398	0.249748	0.177886	0.489518
1179	P27348	YWHAQ 14-3-3 protein theta	YWHAQ	R.YLAEVAC*GDDR.K	1.49	1.54	1.55	1.26271	1.4	1.55	3	1.40424	0.143691	0.102327	0.489787
1121	P13639	EEF2 Elongation factor 2	EEF2	R.FTDTRKDEQERC*ITIK.S	1.63		1.43	1.38136		1.43	2	1.40568	0.0343966	0.0244697	0.491266
1129	P23921	RRM1 Ribonucleoside-diphosphate reductase large subunit	RRM1	K.IIDINYYPVPEAC*LSNKR.H	1.62		1.44	1.37288		1.44	2	1.40644	0.04746	0.0337448	0.492049
1222	P62701	RPS4X 40S ribosomal protein S4, X isoform	RPS4X	R.ITPEEAKYKLC*K.V	1.34	1.49	1.73	1.13559	1.35455	1.73	3	1.40671	0.300618	0.213702	0.492328
1091	P09110	ACAA1 3-ketoacyl-CoA thiolase, peroxisomal	ACAA1	K.ARDC*LIPMGITSENVAER.F	1.68		1.39	1.42373		1.39	2	1.40686	0.0238499	0.0169525	0.492483
1230	Q9H410	DSN1 Kinetochore-associated protein DSN1 homolog	DSN1	K.KGGNC*DLSHQER.L	1.21		1.79	1.02542		1.79	2	1.40771	0.540637	0.384054	0.493352
1057	Q9P258	RCC2 Protein RCC2	RCC2	K.AVQDLC*GWR.I	1.76	1.53	1.35	1.49153	1.39091	1.35	3	1.41081	0.0728316	0.0516239	0.496525
1518	Q96BN8	OTULIN Ubiquitin thioesterase otulin	OTULIN	R.VRGDNYC*ALR.A	1.29	1.91		1.09322	1.73636		2	1.41479	0.454771	0.32144	0.50059
1193	Q9UJZ1	STOML2 Stomatin-like protein 2, mitochondrial	STOML2	R.ESLNASIVDAINQAADC*WGIR.C	1.49		1.58	1.26271		1.58	2	1.42136	0.224357	0.157847	0.507268
860	Q6NXE6	ARMC6 Armadillo repeat-containing protein 6	ARMC6	K.AFLDNPGILSELC*GTLSR.L	2		1.15	1.69492		1.15	2	1.42246	0.385313	0.270879	0.508386
1213	O14744	PRMT5 Protein arginine N-methyltransferase 5	PRMT5	R.DLNC*VPEIADTLGAVAK.Q	1.38		1.68	1.16949		1.68	2	1.42475	0.360984	0.253367	0.510705
1185	Q99829	CPNE1 Copine-1	CPNE1	R.VRNC*SSPEFSK.T	1.53		1.56	1.29661		1.56	2	1.42831	0.186245	0.130396	0.514304
1145	Q7Z2W4	ZC3HAV1 Zinc finger CCCH-type antiviral protein 1	ZC3HAV1	K.NSNVDSSYLESLYQSC*PR.G	1.65		1.46	1.39831		1.46	2	1.42915	0.0436249	0.030525	0.51516
953	Q08J23	NSUN2 tRNA (cytosine(34)-C(5))-methyltransferase	NSUN2	R.MVYSTC*SLNPIEDEAVIASLLEK.S	1.94		1.22	1.64407		1.22	2	1.43203	0.299861	0.209395	0.518066
1118	P61927	RPL37 60S ribosomal protein L37	RPL37	K.THTLC*R.R	1.57	1.69	1.43	1.33051	1.53636	1.43	3	1.43229	0.102947	0.0718756	0.518324
1138	P68036	UBE2L3 Ubiquitin-conjugating enzyme E2 L3	UBE2L3	K.GQVC*LPVISAENWKPATK.T	1.68		1.45	1.42373		1.45	2	1.43686	0.0185765	0.0129285	0.522924
1223	P61106	RAB14 Ras-related protein Rab-14	RAB14	K.FMADC*PHTIGVEFGTR.I	1.35		1.73	1.14407		1.73	2	1.43703	0.414317	0.288314	0.523094
1195	P62241	RPS8 40S ribosomal protein S8	RPS8	K.NC*IVLIDSTPYR.Q	1.48	1.61	1.6	1.25424	1.46364	1.6	3	1.43929	0.174162	0.121006	0.525359
1216	O00148	DDX39A ATP-dependent RNA helicase DDX39A	DDX39A	K.HFVLDEC*DK.M	1.58	1.4	1.71	1.33898	1.27273	1.71	3	1.44057	0.235673	0.163597	0.52664
1011	P11586	MTHFD1 C-1-tetrahydrofolate synthase, cytoplasmic	MTHFD1	K.GC*LELIKETGVPIAGR.H	1.88		1.29	1.59322		1.29	2	1.44161	0.214409	0.148729	0.527681
1146	P22314	UBA1 Ubiquitin-like modifier-activating enzyme 1	UBA1	K.SIPIC*TLK.N	1.68		1.46	1.42373		1.46	2	1.44186	0.0256476	0.0177878	0.527935
1240	Q9H0C8	ILKAP Integrin-linked kinase-associated serine/threonine	ILKAP	R.FILLAC*DGLFK.V	1.22		1.85	1.0339		1.85	2	1.44195	0.577071	0.400202	0.52802
1122	P11586	MTHFD1 C-1-tetrahydrofolate synthase, cytoplasmic	MTHFD1	R.GDLNDC*FIPC*TPK.G	1.74		1.43	1.47458		1.43	2	1.45229	0.0315202	0.0217038	0.538328
1180	O60547	GMDS GDP-mannose 4,6 dehydratase	GMDS	K.LHYGDLTDSTC*LVK.I	1.6		1.55	1.35593		1.55	2	1.45297	0.137227	0.0944459	0.539001
1236	O95573	ACSL3 Long-chain-fatty-acid--CoA ligase 3	ACSL3	R.LLLC*GGAPLSATTQR.F	1.27		1.83	1.07627		1.83	2	1.45314	0.532967	0.36677	0.539169
929	Q15370	ELOB Elongin-B	ELOB	R.ADDTFEALC*IEPFSSPPELPDVMKPQDSGSSANEQAVQ.-	2.02		1.2	1.71186		1.2	2	1.45593	0.361943	0.248599	0.541943
1167	P17987	TCP1 T-complex protein 1 subunit alpha	TCP1	R.IC*DDELILIK.N	1.65		1.52	1.39831		1.52	2	1.45915	0.0860513	0.0589735	0.545131
1197	P62857	RPS28 40S ribosomal protein S28	RPS28	R.TGSQGQC*TQVR.V	1.57		1.6	1.33051		1.6	2	1.46525	0.190559	0.130052	0.551151
698	P00558	PGK1 Phosphoglycerate kinase 1	PGK1	K.TGQATVASGIPAGWMGLDC*GPESSKK.Y	2.25		1.03	1.90678		1.03	2	1.46839	0.619977	0.422215	0.554235
1065	Q92556	ELMO1 Engulfment and cell motility protein 1	ELMO1	K.AVVTGKDC*PHMK.E	1.28	2.16	1.36	1.08475	1.96364	1.36	3	1.46946	0.449554	0.305931	0.555287
1156	Q9HAV4	XPO5 Exportin-5	XPO5	R.SLLC*GEDEAADENPESQEMLEEQLVR.M	1.71		1.49	1.44915		1.49	2	1.46958	0.0288835	0.0196543	0.5554
1158	P17987	TCP1 T-complex protein 1 subunit alpha	TCP1	R.SLHDALC*VVK.R	1.82	1.51	1.5	1.54237	1.37273	1.5	3	1.4717	0.0882925	0.0599936	0.557484
1186	Q15185	PTGES3 Prostaglandin E synthase 3	PTGES3	R.SILCC*LR.K	1.64		1.56	1.38983		1.56	2	1.47492	0.120328	0.081583	0.560632
1100	Q9H0C8	ILKAP Integrin-linked kinase-associated serine/threonine	ILKAP	R.C*GVTSVPDIR.R	1.84		1.4	1.55932		1.4	2	1.47966	0.112658	0.0761375	0.565267
825	Q5TC12	ATPAF1 ATP synthase mitochondrial F1 complex assembly fac	ATPAF1	K.C*AQNQNKT.-	2.18		1.12	1.84746		1.12	2	1.48373	0.51439	0.346687	0.569227
1026	Q96SI9	STRBP Spermatid perinuclear RNA-binding protein	STRBP	R.TLC*GVMR.I	1.96		1.31	1.66102		1.31	2	1.48551	0.248206	0.167085	0.570957
454	P14618	PKM Pyruvate kinase PKM	PKM	R.NTGIIC*TIGPASR.S	1.48	2.59	0.86	1.25424	2.35455	0.86	3	1.48959	0.774572	0.519988	0.574919
1482	P61758	VBP1 Prefoldin subunit 3	VBP1	K.DSC*GKGEMATGNGR.R	1.95	1.46		1.65254	1.32727		2	1.48991	0.23	0.154372	0.575223
1123	Q9UBT2	UBA2 SUMO-activating enzyme subunit 2	UBA2	R.VLVVGAGGIGC*ELLK.N	1.83		1.43	1.55085		1.43	2	1.49042	0.0854521	0.0573341	0.575723
1214	P54136	RARS Arginine--tRNA ligase, cytoplasmic	RARS	K.NC*GC*LGASPNLEQLQEENLK.L	1.55		1.68	1.31356		1.68	2	1.49678	0.259113	0.173113	0.581862
1083	O60880	SH2D1A SH2 domain-containing protein 1A	SH2D1A	R.STQGTTGIREDPDVC*LKAP.-		1.78	1.38		1.61818	1.38	2	1.49909	0.16842	0.112348	0.584088
988	P50991	CCT4 T-complex protein 1 subunit delta	CCT4	R.TLSGMESYC*VR.A	2.06		1.26	1.74576		1.26	2	1.50288	0.343486	0.228552	0.587731
1198	Q02790	FKBP4 Peptidyl-prolyl cis-trans isomerase FKBP4	FKBP4	K.TQLAVC*QQR.I	1.66		1.6	1.40678		1.6	2	1.50339	0.136627	0.0908796	0.588219
1168	P63220	RPS21 40S ribosomal protein S21	RPS21	K.TYAIC*GAIR.R	1.76		1.52	1.49153		1.52	2	1.50576	0.0201346	0.0133717	0.590494
1189	Q9Y490	TLN1 Talin-1	TLN1	K.HTSALC*NSCR.L	1.58	1.77	1.57	1.33898	1.60909	1.57	3	1.50602	0.145977	0.0969285	0.590745
1228	P78417	GSTO1 Glutathione S-transferase omega-1	GSTO1	K.LNEC*VDHTPK.L		1.39	1.75		1.26364	1.75	2	1.50682	0.343911	0.228237	0.591505
1177	P11940	PABPC1 Polyadenylate-binding protein 1	PABPC1	K.GFGFVC*FSSPEEATK.A	1.74		1.54	1.47458		1.54	2	1.50729	0.0462616	0.0306919	0.591955
725	O75940	SMNDC1 Survival of motor neuron-related-splicing factor 3	SMNDC1	K.VGVGTC*GIADKPMTQYQDTSK.Y	2.39	1.62	1.05	2.02542	1.47273	1.05	3	1.51605	0.489153	0.322649	0.600318
1512	P62937	PPIA Peptidyl-prolyl cis-trans isomerase A	PPIA	K.KITIADC*GQLE.-	1.64	1.81		1.38983	1.64545		2	1.51764	0.180753	0.119101	0.601832
1147	P34896	SHMT1 Serine hydroxymethyltransferase, cytosolic	SHMT1	R.AVLEALGSC*LNNK.Y	1.86		1.46	1.57627		1.46	2	1.51814	0.0822161	0.054156	0.602301
1225	Q02543	RPL18A 60S ribosomal protein L18a	RPL18A	K.KSSGEIVYC*GQVFEK.S	1.5	1.7	1.74	1.27119	1.54545	1.74	3	1.51888	0.235534	0.155071	0.603008
1154	P53396	ACLY ATP-citrate synthase	ACLY	R.KPASFMTSIC*DER.G	1.86		1.48	1.57627		1.48	2	1.52814	0.068074	0.0445471	0.611773
1169	Q9H773	DCTPP1 dCTP pyrophosphatase 1	DCTPP1	R.KYTELPHGAISEDQAVGPADIPC*DSTGQTST.-	1.82		1.52	1.54237		1.52	2	1.53119	0.01582	0.0103319	0.61465
997	P04818	TYMS Thymidylate synthase	TYMS	R.IIMC*AWNPR.D	2.12		1.27	1.79661		1.27	2	1.53331	0.37237	0.242854	0.616645
1217	P68104	EEF1A1 Elongation factor 1-alpha 1	EEF1A1	K.NMITGTSQADC*AVLIVAAGVGEFEAGISK.N	1.62		1.71	1.37288		1.71	2	1.54144	0.238379	0.154647	0.624279
1264	Q9Y3F4	STRAP Serine-threonine kinase receptor-associated protei	STRAP	K.C*VLPEEDSGELAKPK.I	1.14		2.13	0.966102		2.13	2	1.54805	0.823	0.531637	0.630453
1215	Q8NBF2	NHLRC2 NHL repeat-containing protein 2	NHLRC2	K.AILFSQPLQITDTQQGC*IAPVELR.Y	1.67		1.69	1.41525		1.69	2	1.55263	0.194275	0.125126	0.634711
1242	O43681	ASNA1 ATPase ASNA1	ASNA1	K.NQISPFISQMC*NMLGLGDMNADQLASK.L	1.47		1.86	1.24576		1.86	2	1.55288	0.434331	0.279694	0.634948
1226	P22234	PAICS Multifunctional protein ADE2	PAICS	K.C*GETAFIAPQCEMIPIEWVCR.R	1.62		1.74	1.37288		1.74	2	1.55644	0.259592	0.166786	0.638251
1261	O95248	SBF1 Myotubularin-related protein 5	SBF1	R.C*SGLHVNSAR.R	1.21		2.1	1.02542		2.1	2	1.56271	0.75984	0.486232	0.644052
1161	Q9Y224	C14orf166 UPF0568 protein C14orf166	C14orf166	K.LTALDYHNPAGFNC*K.D	1.92		1.5	1.62712		1.5	2	1.56356	0.0898865	0.0574884	0.644834
1148	Q8N0Z6	TTC5 Tetratricopeptide repeat protein 5	TTC5	R.VETPLLLVVNGKPQGSSSQAVATVASRPQC*E.-	1.98		1.46	1.67797		1.46	2	1.56898	0.154125	0.0982326	0.64983
1208	P62888	RPL30 60S ribosomal protein L30	RPL30	K.LVILANNC*PALR.K	1.75		1.66	1.48305		1.66	2	1.57153	0.125122	0.0796181	0.652166
1200	P50991	CCT4 T-complex protein 1 subunit delta	CCT4	K.IGLIQFC*LSAPK.T	1.8		1.62	1.52542		1.62	2	1.57271	0.0668755	0.0425224	0.653254
1237	P06132	UROD Uroporphyrinogen decarboxylase	UROD	R.AAQDFFSTC*R.S	1.61		1.83	1.36441		1.83	2	1.5972	0.329224	0.206125	0.675548
1257	P62273	RPS29 40S ribosomal protein S29	RPS29	K.YGLNMC*R.Q	1.34	1.76	2.08	1.13559	1.6	2.08	3	1.6052	0.472225	0.294185	0.682751
1130	P00558	PGK1 Phosphoglycerate kinase 1	PGK1	R.GCITIIGGGDTATC*C*AK.W	2.09		1.44	1.77119		1.44	2	1.60559	0.234184	0.145855	0.683106
1165	P25398	RPS12 40S ribosomal protein S12	RPS12	K.VVGC*SCVVVK.D	2.21	1.57	1.52	1.87288	1.42727	1.52	3	1.60672	0.235121	0.146336	0.684117
1202	O60547	GMDS GDP-mannose 4,6 dehydratase	GMDS	K.YYRPTEVDFLQGDC*TK.A		1.74	1.64		1.58182	1.64	2	1.61091	0.0411408	0.0255388	0.687875
1231	P60866	RPS20 40S ribosomal protein S20	RPS20	K.SLEKVC*ADLIR.G	1.69		1.79	1.4322		1.79	2	1.6111	0.253	0.157036	0.688048
1042	P25398	RPS12 40S ribosomal protein S12	RPS12	R.QAHLC*VLASNCDEPMYVK.L	2.25		1.33	1.90678		1.33	2	1.61839	0.407845	0.252007	0.694559
1247	Q06210	GFPT1 Glutamine--fructose-6-phosphate aminotransferase [	GFPT1	R.GYHYATC*LEGALK.I	1.53		1.95	1.29661		1.95	2	1.62331	0.462016	0.284615	0.698934
1209	Q14566	MCM6 DNA replication licensing factor MCM6	MCM6	R.LGFSEYC*R.I	1.88		1.66	1.59322		1.66	2	1.62661	0.0472204	0.0290299	0.701869
1239	P62241	RPS8 40S ribosomal protein S8	RPS8	R.LDVGNFSWGSEC*C*TR.K	1.67		1.84	1.41525		1.84	2	1.62763	0.300341	0.184527	0.70277
1258	P14868	DARS Aspartate--tRNA ligase, cytoplasmic	DARS	K.IGSC*TQQDVELHVQK.I	1.39		2.08	1.17797		2.08	2	1.62898	0.637834	0.391554	0.703972
1205	Q02543	RPL18A 60S ribosomal protein L18a	RPL18A	R.DLTTAGAVTQC*YR.D	2.09	1.65	1.65	1.77119	1.5	1.65	3	1.6404	0.135848	0.0828142	0.714044
1218	P63279	UBE2I SUMO-conjugating enzyme UBC9	UBE2I	K.QILLGIQELLNEPNIQDPAQAEAYTIYC*QNR.V	1.88		1.71	1.59322		1.71	2	1.65161	0.0825757	0.0499971	0.723873
1206	P61247	RPS3A 40S ribosomal protein S3a	RPS3A	R.LFC*VGFTK.K	1.97		1.65	1.66949		1.65	2	1.65975	0.0137826	0.00830404	0.730962
1210	Q01813	PFKP ATP-dependent 6-phosphofructokinase, platelet type	PFKP	K.AAC*NLLQR.G	1.96		1.66	1.66102		1.66	2	1.66051	0.000719092	0.000433055	0.731625
1253	P08134	RHOC Rho-related GTP-binding protein RhoC	RHOC	K.KLVIVGDGAC*GK.T	1.54		2.02	1.30508		2.02	2	1.66254	0.505521	0.304065	0.733391
1117	P33991	MCM4 DNA replication licensing factor MCM4	MCM4	K.AGIIC*QLNAR.T	2.25		1.42	1.90678		1.42	2	1.66339	0.344205	0.20693	0.734126
1270	O60502	MGEA5 Protein O-GlcNAcase	MGEA5	R.GAFC*EVRPDDKR.I	1.26		2.26	1.0678		2.26	2	1.6639	0.843015	0.506651	0.734567
942	P09211	GSTP1 Glutathione S-transferase P	GSTP1	K.ASC*LYGQLPK.F	2.5		1.21	2.11864		1.21	2	1.66432	0.642508	0.386048	0.734935
1249	O00148	DDX39A ATP-dependent RNA helicase DDX39A	DDX39A	K.QC*MMFSATLSK.D	1.62		1.96	1.37288		1.96	2	1.66644	0.415156	0.249127	0.73677
1221	Q99873	PRMT1 Protein arginine N-methyltransferase 1	PRMT1	K.QLVTNAC*LIK.E	1.92		1.72	1.62712		1.72	2	1.67356	0.065677	0.0392439	0.74292
1232	Q14151	SAFB2 Scaffold attachment factor B2	SAFB2	K.ILDILGETC*K.S	1.84		1.79	1.55932		1.79	2	1.67466	0.163114	0.0974012	0.743869
1254	O95347	SMC2 Structural maintenance of chromosomes protein 2	SMC2	K.KKNLAC*EESK.R	1.57		2.02	1.33051		2.02	2	1.67525	0.487544	0.291027	0.74438
1255	P14649	MYL6B Myosin light chain 6B	MYL6B	K.ILYSQC*GDVMR.A	1.52		2.07	1.28814		2.07	2	1.67907	0.552862	0.329267	0.74766
1201	P55072	VCP Transitional endoplasmic reticulum ATPase	VCP	K.GVLFYGPPGC*GK.T	2.18	1.74	1.64	1.84746	1.58182	1.64	3	1.68976	0.139635	0.0826362	0.756817
1244	Q1KMD3	HNRNPUL2 Heterogeneous nuclear ribonucleoprotein U-like pro	HNRNPUL2	R.LQEALDAEMLEDEAGGGGAGPGGAC*K.A	1.72		1.93	1.45763		1.93	2	1.69381	0.334018	0.197199	0.760275
1219	Q99832	CCT7 T-complex protein 1 subunit eta	CCT7	R.INALTAASEAAC*LIVSVDETIKNPR.S	1.98		1.71	1.67797		1.71	2	1.69398	0.0226514	0.0133717	0.760419
1250	P56381	ATP5E ATP synthase subunit epsilon, mitochondrial	ATP5E	R.YSQIC*AK.A	1.73		1.96	1.4661		1.96	2	1.71305	0.349239	0.20387	0.776568
1517	P60174	TPI1 Triosephosphate isomerase	TPI1	K.IAVAAQNC*YK.V	2.02	1.89		1.71186	1.71818		2	1.71502	0.00446708	0.00260468	0.778228
930	Q12874	SF3A3 Splicing factor 3A subunit 3	SF3A3	R.YLDLHDC*YLK.Y	2.66		1.2	2.25424		1.2	2	1.72712	0.745458	0.43162	0.788367
1266	P62241	RPS8 40S ribosomal protein S8	RPS8	K.LLAC*IASR.P	1.51		2.19	1.27966		2.19	2	1.73483	0.643707	0.371049	0.794795
1181	P50991	CCT4 T-complex protein 1 subunit delta	CCT4	K.LGGTIDDC*ELVEGLVLTQK.V	2.27		1.55	1.92373		1.55	2	1.73686	0.264266	0.152151	0.796485
1265	P14618	PKM Pyruvate kinase PKM	PKM	K.C*CSGAIIVLTK.S	1.61		2.15	1.36441		2.15	2	1.7572	0.555498	0.316126	0.813281
1245	P47756	CAPZB F-actin-capping protein subunit beta	CAPZB	K.GC*WDSIHVVEVQEK.S	1.88		1.93	1.59322		1.93	2	1.76161	0.238139	0.135183	0.816895
1227	P07814	EPRS Bifunctional glutamate/proline--tRNA ligase	EPRS	K.ERPTPSLNNNC*TTSEDSLVLYNR.V	2.13		1.74	1.80508		1.74	2	1.77254	0.0460219	0.0259638	0.82582
1220	O75391	SPAG7 Sperm-associated antigen 7	SPAG7	K.TYGC*VPVANKR.D	2.22		1.71	1.88136		1.71	2	1.79568	0.121167	0.067477	0.844529
1246	P49903	SEPHS1 Selenide, water dikinase 1	SEPHS1	R.FTELKGTGC*K.V	2.01		1.93	1.70339		1.93	2	1.81669	0.160238	0.0882028	0.861316
1233	P55036	PSMD4 26S proteasome non-ATPase regulatory subunit 4	PSMD4	R.SNPENNVGLITLANDC*EVLTTLTPDTGR.I	2.18		1.79	1.84746		1.79	2	1.81873	0.0406287	0.0223391	0.86293
1274	Q7RTV0	PHF5A PHD finger-like domain-containing protein 5A	PHF5A	R.IC*DEC*NYGSYQGR.C	1.64	1.76	2.5	1.38983	1.6	2.5	3	1.82994	0.589724	0.322264	0.871799
1101	P08559	PDHA1 Pyruvate dehydrogenase E1 component subunit alpha,	PDHA1	K.LPCIFIC*ENNR.Y	2.68		1.4	2.27119		1.4	2	1.83559	0.616022	0.335598	0.876246
1102	Q01813	PFKP ATP-dependent 6-phosphofructokinase, platelet type	PFKP	R.GITNLC*VIGGDGSLTGANLFRK.E	2.73		1.4	2.31356		1.4	2	1.85678	0.645984	0.347906	0.892803
1267	P60709	ACTB Actin, cytoplasmic 1	ACTB	K.EKLC*YVALDFEQEMATAASSSSLEK.S	1.81		2.21	1.5339		2.21	2	1.87195	0.478076	0.255389	0.904541
1273	P07195	LDHB L-lactate dehydrogenase B chain	LDHB	K.GMYGIENEVFLSLPC*ILNAR.G	1.62		2.38	1.37288		2.38	2	1.87644	0.71214	0.379517	0.907999
1269	P49591	SARS Serine--tRNA ligase, cytoplasmic	SARS	R.TIC*AILENYQTEK.G	1.78		2.25	1.50847		2.25	2	1.87924	0.524338	0.279016	0.910147
1073	Q92905	COPS5 COP9 signalosome complex subunit 5	COPS5	K.IEDFGVHC*K.Q	2.95		1.36	2.5		1.36	2	1.93	0.806102	0.417669	0.948601
1514	P09211	GSTP1 Glutathione S-transferase P	GSTP1	R.TLGLYGKDQQEAALVDMVNDGVEDLRC*K.Y	2.62	1.85		2.22034	1.68182		2	1.95108	0.380792	0.19517	0.964272
1278	P37802	TAGLN2 Transgelin-2	TAGLN2	K.DGTVLC*ELINALYPEGQAPVKK.I	1.61		2.58	1.36441		2.58	2	1.9722	0.859554	0.435834	0.979808
1248	P29401	TKT Transketolase	TKT	K.QAFTDVATGSLGQGLGAAC*GMAYTGK.Y	2.36		1.95	2		1.95	2	1.975	0.0353553	0.0179014	0.981853
1061	Q16643	DBN1 Drebrin	DBN1	K.C*ACASHVAK.V	3.1		1.35	2.62712		1.35	2	1.98856	0.903059	0.454127	0.991724
1280	Q9UHX1	PUF60 Poly(U)-binding-splicing factor PUF60	PUF60	R.ALAIMC*R.V	1.51	2.18	2.71	1.27966	1.98182	2.71	3	1.99049	0.715209	0.359312	0.993126
1251	Q7Z4W1	DCXR L-xylulose reductase	DCXR	R.AVTNHSVYC*STK.G	2.36		1.99	2		1.99	2	1.995	0.00707107	0.00354439	0.996389
1268	O94925	GLS Glutaminase kidney isoform, mitochondrial	GLS	R.LKEC*MDMLR.L	2.12		2.23	1.79661		2.23	2	2.01331	0.306453	0.152214	1.00957
1238	Q96B54	ZNF428 Zinc finger protein 428	ZNF428	R.SPLGEAPPGTPPC*R.L	2.68		1.83	2.27119		1.83	2	2.05059	0.311966	0.152134	1.03604
1256	P25398	RPS12 40S ribosomal protein S12	RPS12	K.LVEALC*AEHQINLIK.V	2.63		2.07	2.22881		2.07	2	2.14941	0.112298	0.0522461	1.10394
1275	P12268	IMPDH2 Inosine-5-monophosphate dehydrogenase 2	IMPDH2	R.DIDFLKEEEHDC*FLEEIMTK.R	2.21		2.55	1.87288		2.55	2	2.21144	0.478795	0.216508	1.14499
1282	P40926	MDH2 Malate dehydrogenase, mitochondrial	MDH2	K.TIIPLISQC*TPK.V	1.69		3	1.4322		3	2	2.2161	1.1086	0.500248	1.14802
1283	P52789	HK2 Hexokinase-2	HK2	K.ASGC*EGEDVVTLLK.E	2.1		3.06	1.77966		3.06	2	2.41983	0.905336	0.374132	1.27491
1241	P60174	TPI1 Triosephosphate isomerase	TPI1	K.VPADTEVVC*APPTAYIDFAR.Q	3.8		1.85	3.22034		1.85	2	2.53517	0.968976	0.382213	1.34208
1288	Q86Y56	DNAAF5 Dynein assembly factor 5, axonemal	DNAAF5	R.C*LSDPAEGC*R.A	12.27		4.99	10.3983		4.99	2	7.69415	3.82425	0.497033	2.94376

## Sheet: Jurkat 1uM KA
index	ipi	description	symbol	sequence	mr.set_1	mr.set_2	mr.set_3	Corrected mr.set_1	Corrected mr.set_2	Corrected mr.set_3	Count	Average	St. Dev	St. Dev/Average	Average Ratio (log2)
1160	P35236	PTPN7 Tyrosine-protein phosphatase non-receptor type 7	PTPN7	R.SLGAVEPIC*SVNTPR.E	0.41	0.32		0.338843	0.280702		2	0.309772	0.0411121	0.132717	-1.69072
9	Q9UBE0	SAE1 SUMO-activating enzyme subunit 1	SAE1	K.GNGIVEC*LGPK.-		0.24	0.47		0.210526	0.435185	2	0.322856	0.158858	0.49204	-1.63104
1161	P33993	MCM7 DNA replication licensing factor MCM7	MCM7	R.C*SILAAANPAYGR.Y	0.32	0.45		0.264463	0.394737		2	0.3296	0.0921177	0.279483	-1.60121
7	Q8TBF2	FAM213B Prostamide/prostaglandin F synthase	FAM213B	R.FGC*VVCR.W		0.57	0.46		0.5	0.425926	2	0.462963	0.0523783	0.113137	-1.11103
29	Q13905	RAPGEF1 Rap guanine nucleotide exchange factor 1	RAPGEF1	R.IQHSSALSSC*YSR.V	0.43	0.59	0.62	0.355372	0.517544	0.574074	3	0.48233	0.113524	0.235366	-1.05191
26	Q8WUW1	BRK1 Protein BRICK1	BRK1	K.IADFLNSFDMSC*R.S	0.5		0.61	0.413223		0.564815	2	0.489019	0.107192	0.219197	-1.03204
20	Q9UBF2	COPG2 Coatomer subunit gamma-2	COPG2	R.ELAPAVSVLQLFC*SSPK.P		0.51	0.59		0.447368	0.546296	2	0.496832	0.0699526	0.140797	-1.00917
28	Q00765	REEP5 Receptor expression-enhancing protein 5	REEP5	K.NC*MTDLLAK.L	0.64	0.5	0.62	0.528926	0.438596	0.574074	3	0.513865	0.068983	0.134243	-0.960538
22	O15042	U2SURP U2 snRNP-associated SURP motif-containing protein	U2SURP	R.VMTC*FR.A	0.54	0.63	0.61	0.446281	0.552632	0.564815	3	0.521242	0.0652037	0.125093	-0.939973
1169	Q14204	DYNC1H1 Cytoplasmic dynein 1 heavy chain 1	DYNC1H1	K.VQYPQSQAC*K.M	0.57	0.68		0.471074	0.596491		2	0.533783	0.0886831	0.166141	-0.905675
35	P53618	COPB1 Coatomer subunit beta	COPB1	K.VC*HANPSER.A	0.63	0.59	0.65	0.520661	0.517544	0.601852	3	0.546686	0.0478008	0.0874374	-0.871217
84	O60264	SMARCA5 SWI/SNF-related matrix-associated actin-dependent	SMARCA5	R.SVC*LIGDKEQR.A	0.54	0.58	0.74	0.446281	0.508772	0.685185	3	0.546746	0.123896	0.226607	-0.871057
727	Q86W50	METTL16 U6 small nuclear RNA (adenine-(43)-N(6))-methyltra	METTL16	R.TPC*GPALR.E	0.25	0.39	1.18	0.206612	0.342105	1.09259	3	0.547103	0.477241	0.872305	-0.870115
41	P38606	ATP6V1A V-type proton ATPase catalytic subunit A	ATP6V1A	K.YSNSDVIIYVGC*GER.G	0.59		0.66	0.487603		0.611111	2	0.549357	0.0873332	0.158973	-0.864184
62	Q5JTH9	RRP12 RRP12-like protein	RRP12	K.GC*QAEADRAEVSR.F	0.61	0.56	0.71	0.504132	0.491228	0.657407	3	0.550923	0.092444	0.167799	-0.860079
31	Q9UBB4	ATXN10 Ataxin-10	ATXN10	R.NAC*IEC*SVNQNSIR.N	0.58	0.71	0.62	0.479339	0.622807	0.574074	3	0.55874	0.0729529	0.130567	-0.839751
11	Q6P2E9	EDC4 Enhancer of mRNA-decapping protein 4	EDC4	K.GHSTC*LSEGALSPDGTVLATASHDGYVK.F	0.79		0.51	0.652893		0.472222	2	0.562557	0.127753	0.227094	-0.829928
60	O00161	SNAP23 Synaptosomal-associated protein 23	SNAP23	K.CCGLCVCPC*NR.T	0.58		0.7	0.479339		0.648148	2	0.563743	0.119366	0.211739	-0.826889
42	O00567	NOP56 Nucleolar protein 56	NOP56	R.IDC*FSEVPTSVFGEK.L	0.63		0.66	0.520661		0.611111	2	0.565886	0.0639578	0.113022	-0.821416
73	O75122	CLASP2 CLIP-associating protein 2	CLASP2	R.LC*EIFTR.M	0.57		0.72	0.471074		0.666667	2	0.568871	0.138305	0.243121	-0.813828
45	O43169	CYB5B Cytochrome b5 type B	CYB5B	K.QYYIGDIHPSDLKPESGSKDPSKNDTC*K.S	0.62	0.66	0.67	0.512397	0.578947	0.62037	3	0.570571	0.054472	0.0954691	-0.80952
47	Q92797	SYMPK Symplekin	SYMPK	K.ATNLC*FAER.N	0.59	0.68	0.68	0.487603	0.596491	0.62963	3	0.571241	0.0743037	0.130074	-0.807828
1164	Q9UGP8	SEC63 Translocation protein SEC63 homolog	SEC63	K.KNEPPLTC*PYSLK.A	0.75	0.6		0.619835	0.526316		2	0.573075	0.0661279	0.115391	-0.803204
69	O00567	NOP56 Nucleolar protein 56	NOP56	K.IINDNATYC*R.L	0.7	0.58	0.72	0.578512	0.508772	0.666667	3	0.58465	0.0791261	0.135339	-0.774354
49	Q08211	DHX9 ATP-dependent RNA helicase A	DHX9	K.LQISHEAAAC*ITGLR.A	0.45	0.86	0.68	0.371901	0.754386	0.62963	3	0.585305	0.195057	0.333257	-0.772738
99	Q9UL40	ZNF346 Zinc finger protein 346	ZNF346	K.NQC*LFTNTQCK.V	0.51	0.73	0.76	0.421488	0.640351	0.703704	3	0.588514	0.148077	0.251612	-0.764851
248	Q06203	PPAT Amidophosphoribosyltransferase	PPAT	K.C*ELENCQPFVVETLHGK.I	0.28	0.85	0.88	0.231405	0.745614	0.814815	3	0.597278	0.318739	0.533653	-0.743526
24	Q14152	EIF3A Eukaryotic translation initiation factor 3 subunit	EIF3A	R.KLC*DNLR.M	0.66	0.78	0.61	0.545455	0.684211	0.564815	3	0.59816	0.0751481	0.125632	-0.741397
34	Q14203	DCTN1 Dynactin subunit 1	DCTN1	K.VTFSC*AAGFGQR.H	0.88	0.54	0.65	0.727273	0.473684	0.601852	3	0.600936	0.126797	0.210999	-0.734716
74	P53618	COPB1 Coatomer subunit beta	COPB1	R.TLHSC*SVR.F	0.66		0.72	0.545455		0.666667	2	0.606061	0.0857099	0.141421	-0.722466
389	P32322	PYCR1 Pyrroline-5-carboxylate reductase 1, mitochondrial	PYCR1	R.C*MTNTPVVVR.E	0.51	0.57	0.97	0.421488	0.5	0.898148	3	0.606545	0.255568	0.421351	-0.721313
63	Q8TEX9	IPO4 Importin-4	IPO4	R.VRDNIC*GALAR.L	0.73	0.65	0.71	0.603306	0.570175	0.657407	3	0.610296	0.0440341	0.072152	-0.712418
33	O14733	MAP2K7 Dual specificity mitogen-activated protein kinase	MAP2K7	K.LC*DFGISGR.L	0.9	0.59	0.63	0.743802	0.517544	0.583333	3	0.614893	0.116384	0.189275	-0.701593
56	Q8N3U4	STAG2 Cohesin subunit SA-2	STAG2	R.QIDKIQC*AK.T	0.67	0.75	0.7	0.553719	0.657895	0.648148	3	0.619921	0.057539	0.0928168	-0.689845
133	B0I1T2	MYO1G Unconventional myosin-Ig	MYO1G	R.QLC*PTDKTMEFGR.D	0.56	0.75	0.8	0.46281	0.657895	0.740741	3	0.620482	0.142693	0.229971	-0.688539
18	Q15633	TARBP2 RISC-loading complex subunit TARBP2	TARBP2	R.SC*SLGSLGALGPACCR.V	1	0.58	0.57	0.826446	0.508772	0.527778	3	0.620999	0.178176	0.286919	-0.687338
1181	P11388	TOP2A DNA topoisomerase 2-alpha	TOP2A	K.SFGSTC*QLSEK.F	0.66	0.8		0.545455	0.701754		2	0.623604	0.110521	0.177229	-0.681297
21	P34897	SHMT2 Serine hydroxymethyltransferase, mitochondrial	SHMT2	R.AALEALGSC*LNNK.Y	0.85		0.59	0.702479		0.546296	2	0.624388	0.110438	0.176874	-0.679486
78	Q7Z6Z7	HUWE1 E3 ubiquitin-protein ligase HUWE1	HUWE1	R.VLGPAAC*R.N	0.43	0.96	0.73	0.355372	0.842105	0.675926	3	0.624468	0.247413	0.396199	-0.679301
1175	Q9UBB4	ATXN10 Ataxin-10	ATXN10	R.NAC*IECSVNQNSIR.N	0.71	0.76		0.586777	0.666667		2	0.626722	0.0564906	0.0901367	-0.674103
39	P54136	RARS Arginine--tRNA ligase, cytoplasmic	RARS	K.NC*GCLGASPNLEQLQEENLK.L	0.76	0.75	0.66	0.628099	0.657895	0.611111	3	0.632368	0.0236822	0.03745	-0.661163
77	P35579	MYH9 Myosin-9	MYH9	R.NC*AAYLK.L	0.61	0.83	0.73	0.504132	0.72807	0.675926	3	0.636043	0.117175	0.184225	-0.652804
48	Q9NQC3	RTN4 Reticulon-4	RTN4	K.YSNSALGHVNC*TIK.E	0.72	0.78	0.68	0.595041	0.684211	0.62963	3	0.636294	0.0449566	0.0706538	-0.652235
25	Q15027	ACAP1 Arf-GAP with coiled-coil, ANK repeat and PH domain	ACAP1	R.LGPPEPMMAEC*LEK.F	0.8	0.78	0.61	0.661157	0.684211	0.564815	3	0.636727	0.0633359	0.099471	-0.651252
43	P28288	ABCD3 ATP-binding cassette sub-family D member 3	ABCD3	R.SGANVLICGPNGC*GK.S	0.81		0.66	0.669421		0.611111	2	0.640266	0.0412317	0.0643977	-0.643256
38	O75533	SF3B1 Splicing factor 3B subunit 1	SF3B1	K.VQENC*IDLVGR.I	0.82	0.73	0.66	0.677686	0.640351	0.611111	3	0.643049	0.0333693	0.0518924	-0.636999
54	O15020	SPTBN2 Spectrin beta chain, non-erythrocytic 2	SPTBN2	R.IHC*LENVDK.A	0.77	0.75	0.69	0.636364	0.657895	0.638889	3	0.644382	0.0117699	0.0182654	-0.634011
94	Q13098	GPS1 COP9 signalosome complex subunit 1	GPS1	R.ARDYC*TSAK.H	0.73		0.75	0.603306		0.694444	2	0.648875	0.0644448	0.0993177	-0.623987
339	P51398	DAP3 28S ribosomal protein S29, mitochondrial	DAP3	K.TFSEAC*LMVR.K		0.49	0.94		0.429825	0.87037	2	0.650097	0.311513	0.479179	-0.621272
695	P07384	CAPN1 Calpain-1 catalytic subunit	CAPN1	R.RGSTAGGC*R.N		0.26	1.16		0.22807	1.07407	2	0.651072	0.598215	0.918815	-0.619111
30	Q9BQE3	TUBA1C Tubulin alpha-1C chain	TUBA1C	R.AVC*MLSNTTAVAEAWAR.L	0.94	0.69	0.62	0.77686	0.605263	0.574074	3	0.652066	0.109194	0.167459	-0.616911
187	Q9Y5B9	SUPT16H FACT complex subunit SPT16	SUPT16H	R.INFYC*PGSALGR.N	0.56	0.82	0.84	0.46281	0.719298	0.777778	3	0.653295	0.167536	0.256448	-0.614193
23	P30519	HMOX2 Heme oxygenase 2	HMOX2	K.GALEGSSC*PFR.T	0.93	0.74	0.61	0.768595	0.649123	0.564815	3	0.660844	0.102395	0.154945	-0.597618
98	P24752	ACAT1 Acetyl-CoA acetyltransferase, mitochondrial	ACAT1	K.VC*ASGMK.A	0.89	0.62	0.76	0.735537	0.54386	0.703704	3	0.661034	0.102716	0.155387	-0.597205
37	O95336	PGLS 6-phosphogluconolactonase	PGLS	R.AAC*CLAGAR.A	0.91	0.71	0.66	0.752066	0.622807	0.611111	3	0.661995	0.078223	0.118163	-0.595108
1190	O15091	KIAA0391 Mitochondrial ribonuclease P protein 3	KIAA0391	R.DHKAC*LPDAK.T	0.64	0.91		0.528926	0.798246		2	0.663586	0.190438	0.286983	-0.591645
388	P05107	ITGB2 Integrin beta-2	ITGB2	R.C*HLEDNLYKR.S	0.87	0.43	0.97	0.719008	0.377193	0.898148	3	0.664783	0.264677	0.39814	-0.589044
58	P18858	LIG1 DNA ligase 1	LIG1	K.GLFVAC*R.H		0.78	0.7		0.684211	0.648148	2	0.666179	0.0255	0.0382779	-0.586017
76	Q8IY81	FTSJ3 pre-rRNA processing protein FTSJ3	FTSJ3	R.LAC*DFLAR.G		0.75	0.73		0.657895	0.675926	2	0.66691	0.01275	0.019118	-0.584435
121	Q1KMD3	HNRNPUL2 Heterogeneous nuclear ribonucleoprotein U-like pro	HNRNPUL2	K.SRDLLVQQASQC*LSK.L	0.73	0.76	0.79	0.603306	0.666667	0.731481	3	0.667151	0.0640892	0.096064	-0.583914
70	Q96QK1	VPS35 Vacuolar protein sorting-associated protein 35	VPS35	R.VMEC*LKK.A	0.83	0.74	0.72	0.68595	0.649123	0.666667	3	0.667247	0.0184207	0.027607	-0.583708
147	Q6NXE6	ARMC6 Armadillo repeat-containing protein 6	ARMC6	R.FC*DQCKQDK.A	0.8	0.68	0.81	0.661157	0.596491	0.75	3	0.669216	0.0770711	0.115166	-0.579456
57	Q08211	DHX9 ATP-dependent RNA helicase A	DHX9	K.SSVNC*PFSSQDMK.Y	0.82	0.78	0.7	0.677686	0.684211	0.648148	3	0.670015	0.0192161	0.0286801	-0.577735
109	Q6UX07	DHRS13 Dehydrogenase/reductase SDR family member 13	DHRS13	R.VVVVASAAHC*R.G	0.85	0.68	0.77	0.702479	0.596491	0.712963	3	0.670645	0.0644322	0.096075	-0.57638
254	P46013	MKI67 Proliferation marker protein Ki-67	MKI67	R.KADVEGELLAC*R.N	0.64		0.88	0.528926		0.814815	2	0.67187	0.202154	0.300883	-0.573746
200	Q92797	SYMPK Symplekin	SYMPK	K.AVAC*SGAAQVR.I	0.7	0.75	0.85	0.578512	0.657895	0.787037	3	0.674481	0.105247	0.156042	-0.568149
340	B0I1T2	MYO1G Unconventional myosin-Ig	MYO1G	R.VGELVGVLAAHC*QGEGR.T	0.66	0.7	0.94	0.545455	0.614035	0.87037	3	0.67662	0.171261	0.253112	-0.563582
131	Q5T4S7	UBR4 E3 ubiquitin-protein ligase UBR4	UBR4	K.AVQC*LNTSSK.E	0.83	0.69	0.8	0.68595	0.605263	0.740741	3	0.677318	0.0681501	0.100618	-0.562095
219	O00567	NOP56 Nucleolar protein 56	NOP56	R.LVAFC*PFASSQVALENANAVSEGVVHEDLR.L	0.68	0.77	0.86	0.561983	0.675439	0.796296	3	0.677906	0.117176	0.17285	-0.560843
59	P06400	RB1 Retinoblastoma-associated protein	RB1	K.AVGQGC*VEIGSQR.Y	0.79	0.84	0.7	0.652893	0.736842	0.648148	3	0.679294	0.0498943	0.0734502	-0.557891
64	P16455	MGMT Methylated-DNA--protein-cysteine methyltransferase	MGMT	R.VVC*SSGAVGNYSGGLAVK.E	0.94	0.69	0.71	0.77686	0.605263	0.657407	3	0.679843	0.0879708	0.129399	-0.556726
85	Q13155	AIMP2 Aminoacyl tRNA synthase complex-interacting multif	AIMP2	R.SC*ENLAPFNTALK.L	0.77	0.82	0.74	0.636364	0.719298	0.685185	3	0.680282	0.0416841	0.0612747	-0.555794
100	O43175	PHGDH D-3-phosphoglycerate dehydrogenase	PHGDH	K.NAGNC*LSPAVIVGLLK.E	0.8	0.78	0.76	0.661157	0.684211	0.703704	3	0.683024	0.0212982	0.0311822	-0.549992
67	Q9NVX2	NLE1 Notchless protein homolog 1	NLE1	R.AHDGVLC*R.T	0.73	0.91	0.71	0.603306	0.798246	0.657407	3	0.68632	0.100635	0.146629	-0.543048
148	Q9Y2X3	NOP58 Nucleolar protein 58	NOP58	K.IISDNLTYC*K.C	0.72	0.83	0.81	0.595041	0.72807	0.75	3	0.691037	0.0838548	0.121346	-0.533165
112	Q12788	TBL3 Transducin beta-like protein 3	TBL3	R.RDPEAC*EK.L	0.87	0.73	0.78	0.719008	0.640351	0.722222	3	0.69386	0.0463685	0.0668268	-0.527283
1178	P29590	PML Protein PML	PML	R.GCSKPLC*CSCALLDSSHSELK.C	0.85	0.79		0.702479	0.692982		2	0.697731	0.00671531	0.0096245	-0.519257
132	Q1KMD3	HNRNPUL2 Heterogeneous nuclear ribonucleoprotein U-like pro	HNRNPUL2	R.NFILDQC*NVYNSGQR.R	0.88	0.72	0.8	0.727273	0.631579	0.740741	3	0.699864	0.0595189	0.0850435	-0.514853
202	P78527	PRKDC DNA-dependent protein kinase catalytic subunit	PRKDC	R.FNNYVDC*MKK.F	0.74	0.8	0.85	0.61157	0.701754	0.787037	3	0.700121	0.0877448	0.125328	-0.514325
113	P63010	AP2B1 AP-2 complex subunit beta	AP2B1	K.ITEYLC*EPLRK.C	0.78	0.84	0.78	0.644628	0.736842	0.722222	3	0.701231	0.0495614	0.0706778	-0.512039
217	P43034	PAFAH1B1 Platelet-activating factor acetylhydrolase IB subu	PAFAH1B1	R.MVRPNQDGTLIASC*SNDQTVR.V	0.97	0.58	0.86	0.801653	0.508772	0.796296	3	0.70224	0.16757	0.238622	-0.509963
204	Q15782	CHI3L2 Chitinase-3-like protein 2	CHI3L2	K.SC*NQGPYPLVQAVK.R	0.72	0.83	0.85	0.595041	0.72807	0.787037	3	0.703383	0.0983498	0.139824	-0.507618
91	P10809	HSPD1 60 kDa heat shock protein, mitochondrial	HSPD1	K.C*EFQDAYVLLSEK.K	0.78	0.88	0.75	0.644628	0.77193	0.694444	3	0.703667	0.0641501	0.0911653	-0.507034
140	Q15554	TERF2 Telomeric repeat-binding factor 2	TERF2	R.VMQC*LSR.I	0.76	0.85	0.8	0.628099	0.745614	0.740741	3	0.704818	0.0664851	0.0943295	-0.504677
1195	P63010	AP2B1 AP-2 complex subunit beta	AP2B1	R.C*AIKVEQSAER.C	0.71	0.94		0.586777	0.824561		2	0.705669	0.168139	0.238269	-0.502936
278	B0I1T2	MYO1G Unconventional myosin-Ig	MYO1G	R.SRDTC*IVISGESGAGK.T	0.6	0.9	0.9	0.495868	0.789474	0.833333	3	0.706225	0.18349	0.259818	-0.5018
102	Q9UBB4	ATXN10 Ataxin-10	ATXN10	R.LIGNLC*YK.N	0.8	0.86	0.76	0.661157	0.754386	0.703704	3	0.706416	0.0466736	0.066071	-0.501411
134	P04843	RPN1 Dolichyl-diphosphooligosaccharide--protein glycosy	RPN1	K.VAC*ITEQVLTLVNKR.I		0.77	0.8		0.675439	0.740741	2	0.70809	0.0461756	0.0652115	-0.497996
122	Q9Y3E5	PTRH2 Peptidyl-tRNA hydrolase 2, mitochondrial	PTRH2	R.VC*FGMLPK.S	0.85	0.79	0.79	0.702479	0.692982	0.731481	3	0.708981	0.0200561	0.0282887	-0.496181
14	Q92973	TNPO1 Transportin-1	TNPO1	R.SNILTLMYQC*MQDK.M		1.07	0.52		0.938596	0.481481	2	0.710039	0.323229	0.455227	-0.49403
164	Q12906	ILF3 Interleukin enhancer-binding factor 3	ILF3	R.VLRDLC*TR.V	0.8		0.82	0.661157		0.759259	2	0.710208	0.0693688	0.0976738	-0.493686
341	B0I1T2	MYO1G Unconventional myosin-Ig	MYO1G	K.STC*VLEAFGNAR.T	0.71	0.77	0.94	0.586777	0.675439	0.87037	3	0.710862	0.145077	0.204086	-0.492359
65	Q9HA64	FN3KRP Ketosamine-3-kinase	FN3KRP	R.ATGHSGGGC*ISQGR.S	1.01	0.74	0.71	0.834711	0.649123	0.657407	3	0.713747	0.10484	0.146886	-0.486515
89	P57764	GSDMD Gasdermin-D	GSDMD	R.C*LHNFLTDGVPAEGAFTEDFQGLR.A	1.03	0.68	0.75	0.85124	0.596491	0.694444	3	0.714058	0.128502	0.17996	-0.485886
123	P46060	RANGAP1 Ran GTPase-activating protein 1	RANGAP1	K.LNNC*GMGIGGGK.I	0.85	0.81	0.79	0.702479	0.710526	0.731481	3	0.714829	0.0149722	0.0209451	-0.48433
161	Q14974	KPNB1 Importin subunit beta-1	KPNB1	K.NSAKDC*YPAVQK.T	0.7	0.93	0.82	0.578512	0.815789	0.759259	3	0.717854	0.123939	0.172652	-0.478238
239	P05141	SLC25A5 ADP/ATP translocase 2	SLC25A5	R.KGTDIMYTGTLDC*WR.K	0.7	0.88	0.87	0.578512	0.77193	0.805556	3	0.718666	0.122535	0.170504	-0.476607
1203	O43432	EIF4G3 Eukaryotic translation initiation factor 4 gamma 3	EIF4G3	K.NHDEESLEC*LCR.L	0.7	0.98		0.578512	0.859649		2	0.719081	0.198794	0.276455	-0.475774
92	O14980	XPO1 Exportin-1	XPO1	R.TSESLC*QNNMVILK.L	0.84	0.88	0.75	0.694215	0.77193	0.694444	3	0.720196	0.0448026	0.0622089	-0.473538
246	Q96C36	PYCR2 Pyrroline-5-carboxylate reductase 2	PYCR2	K.MLLDSEQHPC*QLK.D	0.76	0.82	0.88	0.628099	0.719298	0.814815	3	0.720737	0.0933661	0.129543	-0.472454
201	P51649	ALDH5A1 Succinate-semialdehyde dehydrogenase, mitochondria	ALDH5A1	R.NTGQTC*VCSNQFLVQR.G	0.86	0.76	0.85	0.710744	0.666667	0.787037	3	0.721483	0.0608995	0.0844088	-0.470964
124	Q9NPA8	ENY2 Transcription and mRNA export factor ENY2	ENY2	K.LIEC*GWKDQLK.A	0.77	0.91	0.79	0.636364	0.798246	0.731481	3	0.72203	0.0813538	0.112674	-0.469869
40	Q14204	DYNC1H1 Cytoplasmic dynein 1 heavy chain 1	DYNC1H1	R.ITNQVIYLNPPIEEC*R.Y		0.95	0.66		0.833333	0.611111	2	0.722222	0.157135	0.217571	-0.469485
189	Q00839	HNRNPU Heterogeneous nuclear ribonucleoprotein U	HNRNPU	R.APQC*LGK.F	0.79	0.84	0.84	0.652893	0.736842	0.777778	3	0.722504	0.0636652	0.0881175	-0.468922
141	P35998	PSMC2 26S proteasome regulatory subunit 7	PSMC2	R.AVANRTDAC*FIR.V	0.75	0.92	0.8	0.619835	0.807018	0.740741	3	0.722531	0.0949107	0.131359	-0.468869
86	Q8TEX9	IPO4 Importin-4	IPO4	R.APAALPALC*DLLASAADPQIR.Q	0.69	1.04	0.74	0.570248	0.912281	0.685185	3	0.722571	0.174054	0.240882	-0.468788
101	Q96FX7	TRMT61A tRNA (adenine(58)-N(1))-methyltransferase catalyti	TRMT61A	R.FCSFSPC*IEQVQR.T	0.95	0.78	0.76	0.785124	0.684211	0.703704	3	0.724346	0.05353	0.0739011	-0.465249
275	O43159	RRP8 Ribosomal RNA-processing protein 8	RRP8	K.AQLSGLQLQPC*LYK.R	0.86	0.72	0.9	0.710744	0.631579	0.833333	3	0.725219	0.101653	0.140169	-0.463512
106	B5ME19	EIF3CL Eukaryotic translation initiation factor 3 subunit	EIF3CL	R.GC*ILTLVER.M	0.91		0.76	0.752066		0.703704	2	0.727885	0.0341974	0.0469819	-0.458218
184	Q96QK1	VPS35 Vacuolar protein sorting-associated protein 35	VPS35	K.C*FSEENHEPLR.T	0.98	0.68	0.84	0.809917	0.596491	0.777778	3	0.728062	0.115071	0.158052	-0.457867
50	Q92888	ARHGEF1 Rho guanine nucleotide exchange factor 1	ARHGEF1	R.FC*AFVQEAESRPR.C	0.95	0.88	0.68	0.785124	0.77193	0.62963	3	0.728894	0.0862186	0.118287	-0.456218
138	P30876	POLR2B DNA-directed RNA polymerase II subunit RPB2	POLR2B	R.DC*QIAHGAAQFLR.E	0.88	0.83	0.8	0.727273	0.72807	0.740741	3	0.732028	0.00755609	0.0103221	-0.450029
79	Q13155	AIMP2 Aminoacyl tRNA synthase complex-interacting multif	AIMP2	K.FSIQTMC*PIEGEGNIAR.F	0.78	1	0.73	0.644628	0.877193	0.675926	3	0.732582	0.12621	0.172282	-0.448937
1174	Q8IX01	SUGP2 SURP and G-patch domain-containing protein 2	SUGP2	R.GADQKPTSADC*AVR.A	0.98	0.75		0.809917	0.657895		2	0.733906	0.107496	0.146471	-0.446333
299	Q99536	VAT1 Synaptic vesicle membrane protein VAT-1 homolog	VAT1	R.AC*GLNFADLMAR.Q	0.76		0.91	0.628099		0.842593	2	0.735346	0.15167	0.206256	-0.443505
715	O75717	WDHD1 WD repeat and HMG-box DNA-binding protein 1	WDHD1	K.LPYC*QIATEK.G	0.52	0.79	1.17	0.429752	0.692982	1.08333	3	0.735356	0.328845	0.447191	-0.443485
167	P55084	HADHB Trifunctional enzyme subunit beta, mitochondrial	HADHB	K.EGGQYGLVAAC*AAGGQGHAMIVEAYPK.-	0.88	0.81	0.83	0.727273	0.710526	0.768519	3	0.735439	0.0298461	0.0405827	-0.443322
1171	Q8NB16	MLKL Mixed lineage kinase domain-like protein	MLKL	K.C*MQEIPQEQIK.E	1.05	0.69		0.867769	0.605263		2	0.736516	0.185619	0.252024	-0.441211
249	Q6JBY9	RCSD1 CapZ-interacting protein	RCSD1	R.SQSDC*GELGDFR.A	0.79	0.85	0.88	0.652893	0.745614	0.814815	3	0.737774	0.0812453	0.110122	-0.43875
1183	P45984	MAPK9 Mitogen-activated protein kinase 9	MAPK9	R.TAC*TNFMMTPYVVTR.Y	0.93	0.81		0.768595	0.710526		2	0.739561	0.0410608	0.0555205	-0.43526
469	Q9UBQ5	EIF3K Eukaryotic translation initiation factor 3 subunit	EIF3K	K.ALTNLPHTDFTLC*K.C	0.65		1.02	0.53719		0.944444	2	0.740817	0.287972	0.388722	-0.43281
293	B0I1T2	MYO1G Unconventional myosin-Ig	MYO1G	R.VSDC*IPLSHR.G	0.77	0.85	0.91	0.636364	0.745614	0.842593	3	0.741523	0.103175	0.13914	-0.431436
32	Q96SB4	SRPK1 SRSF protein kinase 1	SRPK1	K.SNYQGLPLPC*VK.K		1.04	0.62		0.912281	0.574074	2	0.743177	0.239148	0.321792	-0.428221
1179	Q8TEW0	PARD3 Partitioning defective 3 homolog	PARD3	R.GRGC*NESFR.A	0.96	0.79		0.793388	0.692982		2	0.743185	0.0709977	0.0955317	-0.428206
434	Q15005	SPCS2 Signal peptidase complex subunit 2	SPCS2	R.SGGSGGC*SGAGGASNCGTGSGR.S	0.88	0.66	1	0.727273	0.578947	0.925926	3	0.744049	0.174097	0.233985	-0.426531
1209	P56192	MARS Methionine--tRNA ligase, cytoplasmic	MARS	R.LFVSDGVPGC*LPVLAAAGR.A	0.74	1		0.61157	0.877193		2	0.744382	0.187824	0.252322	-0.425886
66	Q13308	PTK7 Inactive tyrosine-protein kinase 7	PTK7	R.NC*LVSAQR.Q	1.04	0.82	0.71	0.859504	0.719298	0.657407	3	0.745403	0.103546	0.138913	-0.423907
90	Q6NZ67	MZT2B Mitotic-spindle organizing protein 2B	MZT2B	K.SMC*AGQR.L	1.04	0.78	0.75	0.859504	0.684211	0.694444	3	0.746053	0.0983847	0.131874	-0.42265
192	P32322	PYCR1 Pyrroline-5-carboxylate reductase 1, mitochondrial	PYCR1	R.SLLINAVEASC*IR.T	0.86	0.86	0.84	0.710744	0.754386	0.777778	3	0.747636	0.034023	0.0455074	-0.419592
136	P23396	RPS3 40S ribosomal protein S3	RPS3	R.GLC*AIAQAESLR.Y	0.95	0.82	0.8	0.785124	0.719298	0.740741	3	0.748388	0.0335725	0.0448598	-0.418142
198	Q9UJX3	ANAPC7 Anaphase-promoting complex subunit 7	ANAPC7	R.NALANQSDC*VLHR.I	0.87		0.84	0.719008		0.777778	2	0.748393	0.0415563	0.0555274	-0.418132
448	P12235	SLC25A4 ADP/ATP translocase 1	SLC25A4	R.KGADIMYTGTVDC*WR.K	0.59	0.94	1.01	0.487603	0.824561	0.935185	3	0.749117	0.233134	0.311211	-0.416738
15	Q9Y2Q3	GSTK1 Glutathione S-transferase kappa 1	GSTK1	K.NQLKETTEAAC*R.Y	0.81	1.25	0.52	0.669421	1.09649	0.481481	3	0.749131	0.315158	0.420698	-0.416709
402	Q02978	SLC25A11 Mitochondrial 2-oxoglutarate/malate carrier protei	SLC25A11	R.GC*IPTMAR.A	0.65	0.92	0.98	0.53719	0.807018	0.907407	3	0.750538	0.191462	0.255099	-0.414002
186	P30044	PRDX5 Peroxiredoxin-5, mitochondrial	PRDX5	K.ALNVEPDGTGLTC*SLAPNIISQL.-	0.98	0.76	0.84	0.809917	0.666667	0.777778	3	0.751454	0.0751658	0.100027	-0.412243
367	Q9NV70	EXOC1 Exocyst complex component 1	EXOC1	R.NFDKC*ISNQIR.Q	0.9	0.71	0.96	0.743802	0.622807	0.888889	3	0.751833	0.133223	0.177197	-0.411517
168	P33240	CSTF2 Cleavage stimulation factor subunit 2	CSTF2	K.LC*VQNSPQEAR.N	0.93	0.82	0.83	0.768595	0.719298	0.768519	3	0.752137	0.0284395	0.0378115	-0.410932
175	P11388	TOP2A DNA topoisomerase 2-alpha	TOP2A	K.LC*NIFSTK.F	0.74	1	0.83	0.61157	0.877193	0.768519	3	0.752427	0.13354	0.17748	-0.410376
188	P24752	ACAT1 Acetyl-CoA acetyltransferase, mitochondrial	ACAT1	K.DGLTDVYNKIHMGSC*AENTAK.K	0.91	0.83	0.84	0.752066	0.72807	0.777778	3	0.752638	0.0248587	0.0330288	-0.409972
116	P05388	RPLP0 60S acidic ribosomal protein P0	RPLP0	K.C*FIVGADNVGSK.Q	0.8	1	0.78	0.661157	0.877193	0.722222	3	0.753524	0.111368	0.147796	-0.408274
72	Q9BVP2	GNL3 Guanine nucleotide-binding protein-like 3	GNL3	K.SSIINSLKQEQMC*NVGVSMGLTR.S		0.96	0.72		0.842105	0.666667	2	0.754386	0.124054	0.164443	-0.406625
323	Q96QK1	VPS35 Vacuolar protein sorting-associated protein 35	VPS35	R.TQC*ALAASK.L	0.84	0.81	0.93	0.694215	0.710526	0.861111	3	0.755284	0.092011	0.121823	-0.404909
5	O94915	FRYL Protein furry homolog-like	FRYL	R.IKC*ESNTVTQSR.L	0.99	1.23	0.4	0.818182	1.07895	0.37037	3	0.755833	0.358379	0.474152	-0.40386
424	Q9BVL2	NUP58 Nucleoporin p58/p45	NUP58	K.ALKDENLPPVIC*QDVENLQK.F	0.72		0.99	0.595041		0.916667	2	0.755854	0.227423	0.300883	-0.403821
193	P24752	ACAT1 Acetyl-CoA acetyltransferase, mitochondrial	ACAT1	K.QGEYGLASIC*NGGGGASAMLIQK.L	0.89	0.86	0.84	0.735537	0.754386	0.777778	3	0.7559	0.021161	0.0279944	-0.403732
12	Q9BU76	MMTAG2 Multiple myeloma tumor-associated protein 2	MMTAG2	R.APC*AGPSREEELAAVR.E	1.26		0.51	1.04132		0.472222	2	0.756772	0.402415	0.531751	-0.402069
236	Q9NZJ0	DTL Denticleless protein homolog	DTL	K.GHQC*SLK.S	1.16	0.59	0.87	0.958678	0.517544	0.805556	3	0.760592	0.223978	0.294478	-0.394805
51	P10515	DLAT Dihydrolipoyllysine-residue acetyltransferase comp	DLAT	K.NFSAIINPPQAC*ILAIGASEDKLVPADNEK.G	0.73	1.2	0.68	0.603306	1.05263	0.62963	3	0.761856	0.252163	0.330985	-0.39241
238	P54886	ALDH18A1 Delta-1-pyrroline-5-carboxylate synthase	ALDH18A1	R.GDEC*GLALGR.L		0.82	0.87		0.719298	0.805556	2	0.762427	0.0609931	0.0799987	-0.391329
240	P30042	C21orf33 ES1 protein homolog, mitochondrial	C21orf33	K.NLSTFAVDGKDC*K.V	0.84	0.9	0.87	0.694215	0.789474	0.805556	3	0.763081	0.0601798	0.0788641	-0.390091
169	P62979	RPS27A Ubiquitin-40S ribosomal protein S27a	RPS27A	K.C*CLTYCFNKPEDK.-	0.94	0.85	0.83	0.77686	0.745614	0.768519	3	0.763664	0.0161785	0.0211854	-0.38899
368	O75150	RNF40 E3 ubiquitin-protein ligase BRE1B	RNF40	R.LREIQPC*LAESR.A	0.87	0.78	0.96	0.719008	0.684211	0.888889	3	0.764036	0.109517	0.14334	-0.388288
103	O14497	ARID1A AT-rich interactive domain-containing protein 1A	ARID1A	R.KNPVC*R.E		0.94	0.76		0.824561	0.703704	2	0.764133	0.0854593	0.111838	-0.388105
36	Q14318	FKBP8 Peptidyl-prolyl cis-trans isomerase FKBP8	FKBP8	K.C*LNNLAASQLK.L	1.02	0.97	0.65	0.842975	0.850877	0.601852	3	0.765235	0.141549	0.184974	-0.386026
114	Q9H0L4	CSTF2T Cleavage stimulation factor subunit 2 tau variant	CSTF2T	K.LC*VQNSHQEAR.N	0.96	0.89	0.78	0.793388	0.780702	0.722222	3	0.765437	0.0379593	0.0495916	-0.385644
146	Q12830	BPTF Nucleosome-remodeling factor subunit BPTF	BPTF	K.AVQMC*SKPR.E	0.96		0.8	0.793388		0.740741	2	0.767065	0.0372275	0.0485325	-0.38258
295	Q9BSJ8	ESYT1 Extended synaptotagmin-1	ESYT1	R.LGTQTFC*SR.V	0.8	0.91	0.91	0.661157	0.798246	0.842593	3	0.767332	0.0945858	0.123266	-0.382078
135	P10644	PRKAR1A cAMP-dependent protein kinase type I-alpha regulat	PRKAR1A	R.SLREC*ELYVQK.H	1.04	0.8	0.8	0.859504	0.701754	0.740741	3	0.767333	0.0821682	0.107083	-0.382075
203	O00541	PES1 Pescadillo homolog	PES1	K.AGEGTYALDSESC*MEK.L	0.99	0.8	0.85	0.818182	0.701754	0.787037	3	0.768991	0.060275	0.078382	-0.378961
325	Q14683	SMC1A Structural maintenance of chromosomes protein 1A	SMC1A	R.NSSAQAFLGPENPEEPYLDGINYNC*VAPGKR.F	0.82	0.88	0.93	0.677686	0.77193	0.861111	3	0.770242	0.0917242	0.119085	-0.376616
250	P22695	UQCRC2 Cytochrome b-c1 complex subunit 2, mitochondrial	UQCRC2	R.NALANPLYC*PDYR.I	0.91	0.85	0.88	0.752066	0.745614	0.814815	3	0.770832	0.0382269	0.0495918	-0.375512
447	Q14344	GNA13 Guanine nucleotide-binding protein subunit alpha-1	GNA13	K.SKEIDKC*LSR.E	0.78	0.84	1.01	0.644628	0.736842	0.935185	3	0.772218	0.148474	0.192269	-0.372919
1199	Q86VP6	CAND1 Cullin-associated NEDD8-dissociated protein 1	CAND1	R.NVVAEC*LGK.L	0.85	0.96		0.702479	0.842105		2	0.772292	0.0987304	0.127841	-0.372781
291	P78527	PRKDC DNA-dependent protein kinase catalytic subunit	PRKDC	R.APPC*EYKDWLTK.M	1.02	0.72	0.91	0.842975	0.631579	0.842593	3	0.772382	0.121939	0.157874	-0.372613
160	P55060	CSE1L Exportin-2	CSE1L	K.LSTAC*PGR.V	0.93	0.9	0.82	0.768595	0.789474	0.759259	3	0.772443	0.0154703	0.0200278	-0.3725
208	P20073	ANXA7 Annexin A7	ANXA7	R.C*YQSEFGR.D	0.89	0.91	0.85	0.735537	0.798246	0.787037	3	0.773607	0.033442	0.0432287	-0.370328
276	Q9NRW3	APOBEC3C DNA dC- dU-editing enzyme APOBEC-3C	APOBEC3C	R.LYYFQYPC*YQEGLR.S		0.82	0.9		0.719298	0.833333	2	0.776316	0.080635	0.103869	-0.365284
342	P55265	ADAR Double-stranded RNA-specific adenosine deaminase	ADAR	K.LGNSC*EFR.L		0.78	0.94		0.684211	0.87037	2	0.77729	0.131635	0.169351	-0.363474
457	Q14152	EIF3A Eukaryotic translation initiation factor 3 subunit	EIF3A	K.NIC*QQVNIK.S	0.75	0.88	1.02	0.619835	0.77193	0.944444	3	0.778736	0.162412	0.208558	-0.360793
259	P42677	RPS27 40S ribosomal protein S27	RPS27	K.ARLTEGC*SFR.R	0.97	0.81	0.89	0.801653	0.710526	0.824074	3	0.778751	0.0601385	0.0772243	-0.360766
93	Q9P2R3	ANKFY1 Rabankyrin-5	ANKFY1	R.GSHTDAPDTATGNC*LLQR.A	0.8	1.12	0.75	0.661157	0.982456	0.694444	3	0.779353	0.176679	0.226699	-0.359652
125	O00410	IPO5 Importin-5	IPO5	R.MAC*GLGGK.L	0.82	1.06	0.79	0.677686	0.929825	0.731481	3	0.779664	0.132795	0.170324	-0.359076
157	P68363	TUBA1B Tubulin alpha-1B chain	TUBA1B	R.AVC*MLSNTTAIAEAWAR.L	1.02	0.84	0.82	0.842975	0.736842	0.759259	3	0.779692	0.0559391	0.0717452	-0.359023
355	Q9H081	MIS12 Protein MIS12 homolog	MIS12	R.IPSNILLPEDKC*K.E	0.94	0.78	0.95	0.77686	0.684211	0.87963	3	0.780233	0.0977532	0.125287	-0.358023
165	Q9HCU9	BRMS1 Breast cancer metastasis-suppressor 1	BRMS1	R.NKYEC*ELQGAK.Q	0.97		0.82	0.801653		0.759259	2	0.780456	0.0299768	0.0384094	-0.357611
166	P78559	MAP1A Microtubule-associated protein 1A	MAP1A	K.GSSGAPVYVDLAYIPNHC*SGK.T	1.06	0.8	0.83	0.876033	0.701754	0.768519	3	0.782102	0.0879298	0.112428	-0.354571
115	Q13308	PTK7 Inactive tyrosine-protein kinase 7	PTK7	R.LPQPEGC*PSK.L	0.97	0.94	0.78	0.801653	0.824561	0.722222	3	0.782812	0.0537081	0.0686091	-0.353262
127	O75528	TADA3 Transcriptional adapter 3	TADA3	K.KSEAQHEQPEDGC*PFGALTQR.L	1.01		0.79	0.834711		0.731481	2	0.783096	0.0729941	0.0932122	-0.352739
137	Q96RU3	FNBP1 Formin-binding protein 1	FNBP1	K.KNSKEEEEYKYTSC*K.A	1.08	0.82	0.8	0.892562	0.719298	0.740741	3	0.7842	0.0944544	0.120447	-0.350706
371	P57772	EEFSEC Selenocysteine-specific elongation factor	EEFSEC	R.LDADIHTNTC*R.L	0.86	0.86	0.96	0.710744	0.754386	0.888889	3	0.784673	0.0928541	0.118335	-0.349837
218	Q06323	PSME1 Proteasome activator complex subunit 1	PSME1	K.KGEDEDKGPPC*GPVNCNEK.I	1.24	0.61	0.86	1.02479	0.535088	0.796296	3	0.785392	0.245035	0.31199	-0.348514
185	Q9NXV6	CDKN2AIP CDKN2A-interacting protein	CDKN2AIP	K.SVYLGTGC*GK.S	1.14	0.73	0.84	0.942149	0.640351	0.777778	3	0.786759	0.151099	0.192053	-0.346006
740	Q96RU3	FNBP1 Formin-binding protein 1	FNBP1	K.AQQHIETC*WK.Q		0.54	1.19		0.473684	1.10185	2	0.787768	0.444182	0.563848	-0.344157
245	Q9ULX6	AKAP8L A-kinase anchor protein 8-like	AKAP8L	R.GQC*MSGASR.L	1.09	0.74	0.88	0.900826	0.649123	0.814815	3	0.788255	0.127937	0.162304	-0.343266
287	Q9Y3E2	BOLA1 BolA-like protein 1	BOLA1	R.VC*LCQGSAGSGAIGPVEAAIR.T	0.9		0.9	0.743802		0.833333	2	0.788567	0.0633085	0.0802829	-0.342694
206	Q99873	PRMT1 Protein arginine N-methyltransferase 1	PRMT1	K.VIGIEC*SSISDYAVK.I	0.99	0.87	0.85	0.818182	0.763158	0.787037	3	0.789459	0.0275918	0.0349503	-0.341064
196	Q00325	SLC25A3 Phosphate carrier protein, mitochondrial	SLC25A3	K.FAC*FER.T	0.78	1.08	0.84	0.644628	0.947368	0.777778	3	0.789925	0.151735	0.192088	-0.340213
173	O00303	EIF3F Eukaryotic translation initiation factor 3 subunit	EIF3F	K.TC*FSPNR.V	0.94	0.94	0.83	0.77686	0.824561	0.768519	3	0.78998	0.0302375	0.0382763	-0.340112
156	Q9NX70	MED29 Mediator of RNA polymerase II transcription subuni	MED29	R.LAHEC*LSQSCDSAK.H	1.08	0.82	0.82	0.892562	0.719298	0.759259	3	0.790373	0.0907256	0.114788	-0.339394
158	O14980	XPO1 Exportin-1	XPO1	K.LDINLLDNVVNC*LYHGEGAQQR.M	1.02	0.88	0.82	0.842975	0.77193	0.759259	3	0.791388	0.0451227	0.0570172	-0.337543
8	Q69YL0	NCBP2-AS2 Uncharacterized protein NCBP2-AS2	NCBP2-AS2	R.LQDLAAGPVGSLC*R.R	1.4		0.46	1.15702		0.425926	2	0.791475	0.516965	0.653166	-0.337384
171	Q13526	PIN1 Peptidyl-prolyl cis-trans isomerase NIMA-interacti	PIN1	K.IKSGEEDFESLASQFSDC*SSAK.A	1.02	0.87	0.83	0.842975	0.763158	0.768519	3	0.791551	0.0446157	0.0563649	-0.337247
281	P26640	VARS Valine--tRNA ligase	VARS	R.IC*LQPPPTSR.T	0.82	0.99	0.9	0.677686	0.868421	0.833333	3	0.793147	0.101519	0.127996	-0.33434
292	Q96GM5	SMARCD1 SWI/SNF-related matrix-associated actin-dependent	SMARCD1	R.DPQGFINDWLQSQC*R.D	1	0.81	0.91	0.826446	0.710526	0.842593	3	0.793188	0.0720412	0.0908249	-0.334265
220	P62979	RPS27A Ubiquitin-40S ribosomal protein S27a	RPS27A	R.ECPSDEC*GAGVFMASHFDR.H	1.06	0.81	0.86	0.876033	0.710526	0.796296	3	0.794285	0.0827717	0.104209	-0.332271
574	P49792	RANBP2 E3 SUMO-protein ligase RanBP2	RANBP2	K.VC*ANHVITK.T	0.83	0.8	1.08	0.68595	0.701754	1	3	0.795902	0.176931	0.222303	-0.329338
271	P07814	EPRS Bifunctional glutamate/proline--tRNA ligase	EPRS	K.LGVENC*YFPMFVSQSALEK.E	0.93		0.89	0.768595		0.824074	2	0.796335	0.0392296	0.0492627	-0.328553
237	Q6YP21	KYAT3 Kynurenine--oxoglutarate transaminase 3	KYAT3	K.RMDDPEC*YFNSLPK.E	1.1	0.77	0.87	0.909091	0.675439	0.805556	3	0.796695	0.117078	0.146954	-0.327901
260	P38606	ATP6V1A V-type proton ATPase catalytic subunit A	ATP6V1A	R.VLDALFPCVQGGTTAIPGAFGC*GK.T	1.02	0.83	0.89	0.842975	0.72807	0.824074	3	0.798373	0.0616133	0.0771735	-0.324865
1227	Q9BQ70	TCF25 Transcription factor 25	TCF25	R.SGC*ALTDAVAPGNK.G	0.8	1.07		0.661157	0.938596		2	0.799877	0.196179	0.245262	-0.32215
81	Q2M389	WASHC4 WASH complex subunit 4	WASHC4	R.SGGLHC*SSNAIR.F	1.12		0.73	0.92562		0.675926	2	0.800773	0.17656	0.220487	-0.320535
1184	P49840	GSK3A Glycogen synthase kinase-3 alpha	GSK3A	K.LC*DFGSAK.Q	1.06	0.83		0.876033	0.72807		2	0.802052	0.104626	0.130447	-0.318233
241	P60604	UBE2G2 Ubiquitin-conjugating enzyme E2 G2	UBE2G2	R.VC*ISILHAPGDDPMGYESSAER.W	0.94	0.94	0.87	0.77686	0.824561	0.805556	3	0.802325	0.0240144	0.029931	-0.31774
263	O94906	PRPF6 Pre-mRNA-processing factor 6	PRPF6	R.HGELWC*AVSK.D		0.89	0.89		0.780702	0.824074	2	0.802388	0.0306689	0.038222	-0.317628
190	P68363	TUBA1B Tubulin alpha-1B chain	TUBA1B	R.SIQFVDWC*PTGFK.V	1.08	0.84	0.84	0.892562	0.736842	0.777778	3	0.802394	0.0807257	0.100606	-0.317617
71	O76075	DFFB DNA fragmentation factor subunit beta	DFFB	R.VLGSMC*QR.L	1.13	0.92	0.72	0.933884	0.807018	0.666667	3	0.802523	0.133666	0.166557	-0.317386
222	P50990	CCT8 T-complex protein 1 subunit theta	CCT8	R.NIQAC*KELAQTTR.T	0.98	0.92	0.86	0.809917	0.807018	0.796296	3	0.80441	0.00717504	0.00891963	-0.313996
223	Q13627	DYRK1A Dual specificity tyrosine-phosphorylation-regulate	DYRK1A	K.IVDFGSSC*QLGQR.I	0.97	0.93	0.86	0.801653	0.815789	0.796296	3	0.80458	0.0100707	0.0125168	-0.313693
104	O14980	XPO1 Exportin-1	XPO1	K.DLLGLC*EQKR.G	1.04	0.97	0.76	0.859504	0.850877	0.703704	3	0.804695	0.0875673	0.108821	-0.313486
107	P49189	ALDH9A1 4-trimethylaminobutyraldehyde dehydrogenase	ALDH9A1	K.GALMANFLTQGQVC*CNGTR.V	1.1		0.76	0.909091		0.703704	2	0.806397	0.145231	0.180098	-0.310437
261	P62829	RPL23 60S ribosomal protein L23	RPL23	R.ISLGLPVGAVINC*ADNTGAK.N	1.02	0.86	0.89	0.842975	0.754386	0.824074	3	0.807145	0.0466579	0.057806	-0.3091
195	P07814	EPRS Bifunctional glutamate/proline--tRNA ligase	EPRS	R.VAC*VQVVIIPCGITNALSEEDKEALIAK.C		0.96	0.84		0.842105	0.777778	2	0.809942	0.0454864	0.0561601	-0.30411
491	Q9H307	PNN Pinin	PNN	R.MC*PATQK.L		0.75	1.04		0.657895	0.962963	2	0.810429	0.215716	0.266175	-0.303243
251	O43823	AKAP8 A-kinase anchor protein 8	AKAP8	K.ANDGGLAAGAPAMHMASYGPEPC*TDNSDSLIAK.I		0.92	0.88		0.807018	0.814815	2	0.810916	0.0055135	0.0067991	-0.302375
194	P20226	TBP TATA-box-binding protein	TBP	K.MVC*TGAK.S	1.07	0.88	0.84	0.884298	0.77193	0.777778	3	0.811335	0.063255	0.0779641	-0.30163
553	O43865	AHCYL1 S-adenosylhomocysteine hydrolase-like protein 1	AHCYL1	K.AGKLC*VPAMNVNDSVTK.Q	0.89	0.81	1.07	0.735537	0.710526	0.990741	3	0.812268	0.155067	0.190906	-0.299972
533	P51610	HCFC1 Host cell factor 1	HCFC1	R.AC*AAGTPAVIR.I	0.88	0.83	1.06	0.727273	0.72807	0.981481	3	0.812275	0.146538	0.180404	-0.29996
264	P46782	RPS5 40S ribosomal protein S5	RPS5	K.AQC*PIVER.L	1	0.9	0.89	0.826446	0.789474	0.824074	3	0.813331	0.0206954	0.0254452	-0.298085
247	Q9NR50	EIF2B3 Translation initiation factor eIF-2B subunit gamma	EIF2B3	K.ALC*AEFK.M	1.08	0.84	0.88	0.892562	0.736842	0.814815	3	0.81474	0.07786	0.0955642	-0.295589
221	P27635	RPL10 60S ribosomal protein L10	RPL10	K.MLSC*AGADR.L	1.06	0.88	0.86	0.876033	0.77193	0.796296	3	0.814753	0.0544505	0.0668307	-0.295565
403	P22087	FBL rRNA 2-O-methyltransferase fibrillarin	FBL	K.ANC*IDSTASAEAVFASEVK.K	0.82	0.98	0.98	0.677686	0.859649	0.907407	3	0.814914	0.121218	0.14875	-0.29528
311	O60610	DIAPH1 Protein diaphanous homolog 1	DIAPH1	K.LQFSEQVENIKPEIVSVTAAC*EELRK.S	0.91	0.96	0.92	0.752066	0.842105	0.851852	3	0.815341	0.055014	0.0674736	-0.294524
279	Q9NP73	ALG13 Putative bifunctional UDP-N-acetylglucosamine tran	ALG13	K.ADLVISHAGAGSC*LETLEK.G	0.98	0.92	0.9	0.809917	0.807018	0.833333	3	0.816756	0.0144294	0.0176667	-0.292023
117	P30084	ECHS1 Enoyl-CoA hydratase, mitochondrial	ECHS1	K.EMQNLSFQDC*YSSK.F	0.97	1.06	0.78	0.801653	0.929825	0.722222	3	0.8179	0.10475	0.128072	-0.290004
155	O14653	GOSR2 Golgi SNAP receptor complex member 2	GOSR2	K.QVHEIQSC*MGR.L	1.31	0.7	0.82	1.08264	0.614035	0.759259	3	0.818646	0.239883	0.293024	-0.288688
191	O75934	BCAS2 Pre-mRNA-splicing factor SPF27	BCAS2	R.IENLELMSQHGC*NAWK.V	1.15	0.84	0.84	0.950413	0.736842	0.777778	3	0.821678	0.113351	0.137951	-0.283355
294	Q92797	SYMPK Symplekin	SYMPK	R.KYC*EDESR.T	1.03	0.88	0.91	0.85124	0.77193	0.842593	3	0.821921	0.0435087	0.0529354	-0.282929
296	P12236	SLC25A6 ADP/ATP translocase 3	SLC25A6	K.GIVDC*IVR.I	0.85	1.05	0.91	0.702479	0.921053	0.842593	3	0.822042	0.110726	0.134697	-0.282717
170	Q71U36	TUBA1A Tubulin alpha-1A chain	TUBA1A	R.TIQFVDWC*PTGFK.V	1.16	0.85	0.83	0.958678	0.745614	0.768519	3	0.82427	0.116962	0.141898	-0.278811
253	Q9Y277	VDAC3 Voltage-dependent anion-selective channel protein	VDAC3	K.VC*NYGLTFTQK.W	0.97	0.98	0.88	0.801653	0.859649	0.814815	3	0.825372	0.0304054	0.0368384	-0.276883
319	Q8N5C7	DTWD1 DTW domain-containing protein 1	DTWD1	K.C*SGDKETGK.L	0.97		0.92	0.801653		0.851852	2	0.826752	0.035496	0.0429343	-0.274473
145	P63010	AP2B1 AP-2 complex subunit beta	AP2B1	K.EC*HLNADTVSSK.L	0.63	1.39	0.8	0.520661	1.2193	0.740741	3	0.8269	0.357199	0.431973	-0.274215
159	P04350	TUBB4A Tubulin beta-4A chain	TUBB4A	K.LTTPTYGDLNHLVSATMSGVTTC*LR.F	1.15	0.88	0.82	0.950413	0.77193	0.759259	3	0.827201	0.106893	0.129223	-0.273691
212	Q9Y5L0	TNPO3 Transportin-3	TNPO3	K.GLC*EKPLASAAAK.A	0.94	1.05	0.85	0.77686	0.921053	0.787037	3	0.828316	0.080473	0.0971525	-0.271746
386	Q01518	CAP1 Adenylyl cyclase-associated protein 1	CAP1	K.TDGC*HAYLSK.N	0.93		0.96	0.768595		0.888889	2	0.828742	0.0850606	0.102638	-0.271005
459	Q6P2Q9	PRPF8 Pre-mRNA-processing-splicing factor 8	PRPF8	K.FIC*ISDLR.A	0.87	0.94	1.02	0.719008	0.824561	0.944444	3	0.829338	0.112794	0.136005	-0.269968
552	P11586	MTHFD1 C-1-tetrahydrofolate synthase, cytoplasmic	MTHFD1	R.GDLNDC*FIPCTPK.G	1.04	0.73	1.07	0.859504	0.640351	0.990741	3	0.830199	0.177024	0.21323	-0.268472
177	P50570	DNM2 Dynamin-2	DNM2	K.LQDAFSSIGQSC*HLDLPQIAVVGGQSAGK.S	1.08		0.83	0.892562		0.768519	2	0.83054	0.087712	0.105608	-0.267878
205	Q53H96	PYCR3 Pyrroline-5-carboxylate reductase 3	PYCR3	R.SDVC*TPGGTTIYGLHALEQGGLR.A	1.15	0.86	0.85	0.950413	0.754386	0.787037	3	0.830612	0.105027	0.126446	-0.267753
207	P83731	RPL24 60S ribosomal protein L24	RPL24	K.C*ESAFLSK.R	1.12	0.89	0.85	0.92562	0.780702	0.787037	3	0.83112	0.0819009	0.0985429	-0.266872
210	P62266	RPS23 40S ribosomal protein S23	RPS23	K.ITAFVPNDGC*LNFIEENDEVLVAGFGR.K	1.09	0.92	0.85	0.900826	0.807018	0.787037	3	0.831627	0.0607555	0.0730561	-0.265991
435	P37198	NUP62 Nuclear pore glycoprotein p62	NUP62	R.KVEEVTKVC*EGR.R	1.06	0.79	1	0.876033	0.692982	0.925926	3	0.831647	0.122651	0.14748	-0.265957
162	P10809	HSPD1 60 kDa heat shock protein, mitochondrial	HSPD1	R.AAVEEGIVLGGGC*ALLR.C	1.04	1	0.82	0.859504	0.877193	0.759259	3	0.831985	0.0636007	0.0764445	-0.26537
277	A6NNZ2	cimageipi-sp|A6NNZ2|TBB8L_HUMAN Tubulin beta-8 chain-like protein LOC260334	cimageipi-sp|A6NNZ2|TBB8L_HUMAN	K.TAVC*DIPPR.G	1.09	0.87	0.9	0.900826	0.763158	0.833333	3	0.832439	0.0688386	0.0826951	-0.264583
252	P49207	RPL34 60S ribosomal protein L34	RPL34	K.SAC*GVCPGR.L	1.03	0.95	0.88	0.85124	0.833333	0.814815	3	0.833129	0.0182133	0.0218613	-0.263388
399	Q9Y2R4	DDX52 Probable ATP-dependent RNA helicase DDX52	DDX52	R.SVANVIQQAGC*PVPEYIK.G	0.93		0.97	0.768595		0.898148	2	0.833372	0.0916079	0.109924	-0.262968
143	Q9H8V3	ECT2 Protein ECT2	ECT2	K.VTHLVANC*TQGEK.F	0.91	1.15	0.8	0.752066	1.00877	0.740741	3	0.83386	0.151584	0.181786	-0.262124
142	Q86XI2	NCAPG2 Condensin-2 complex subunit G2	NCAPG2	K.MLEC*IAR.S		1.06	0.8		0.929825	0.740741	2	0.835283	0.133702	0.160069	-0.259664
211	P60468	SEC61B Protein transport protein Sec61 subunit beta	SEC61B	K.NASC*GTR.S	1	1.02	0.85	0.826446	0.894737	0.787037	3	0.836073	0.0544915	0.0651755	-0.258299
308	Q14790	CASP8 Caspase-8	CASP8	K.VFFIQAC*QGDNYQK.G	1.06	0.89	0.92	0.876033	0.780702	0.851852	3	0.836196	0.0495566	0.0592643	-0.258088
280	Q9HAV7	GRPEL1 GrpE protein homolog 1, mitochondrial	GRPEL1	K.ATQC*VPKEEIKDDNPHLK.N	1.04	0.93	0.9	0.859504	0.815789	0.833333	3	0.836209	0.0219987	0.0263077	-0.258065
401	Q9BTE6	AARSD1 Alanyl-tRNA editing protein Aarsd1	AARSD1	R.VVNIEGVDSNMC*CGTHVSNLSDLQVIK.I	1.09	0.8	0.98	0.900826	0.701754	0.907407	3	0.836663	0.11688	0.139698	-0.257282
618	Q9H0W8	SMG9 Protein SMG9	SMG9	R.REDFC*PR.K	1.03	0.72	1.11	0.85124	0.631579	1.02778	3	0.836865	0.19849	0.237183	-0.256932
518	P21796	VDAC1 Voltage-dependent anion-selective channel protein	VDAC1	K.YQIDPDAC*FSAK.V	0.73	1.07	1.05	0.603306	0.938596	0.972222	3	0.838041	0.203981	0.243402	-0.254906
324	Q8TD19	NEK9 Serine/threonine-protein kinase Nek9	NEK9	R.LLTFGC*NK.C	1.1	0.85	0.93	0.909091	0.745614	0.861111	3	0.838605	0.0840301	0.100202	-0.253936
300	P04350	TUBB4A Tubulin beta-4A chain	TUBB4A	R.KEAESC*DCLQGFQLTHSLGGGTGSGMGTLLISK.I	1.01		0.91	0.834711		0.842593	2	0.838652	0.00557331	0.00664556	-0.253856
390	O94906	PRPF6 Pre-mRNA-processing factor 6	PRPF6	R.AVAHC*PK.A	0.95	0.95	0.97	0.785124	0.833333	0.898148	3	0.838868	0.056715	0.067609	-0.253483
336	Q68DK7	MSL1 Male-specific lethal 1 homolog	MSL1	R.KSPLGGGGGSGASSQAAC*LK.Q	0.99		0.93	0.818182		0.861111	2	0.839646	0.0303556	0.0361528	-0.252146
349	Q8N5L8	RPP25L Ribonuclease P protein subunit p25-like protein	RPP25L	R.DPLDPNEC*GYQPPGAPPGLGSMPSSSCGPR.S	0.98		0.94	0.809917		0.87037	2	0.840144	0.0427467	0.0508803	-0.251292
283	Q9Y285	FARSA Phenylalanine--tRNA ligase alpha subunit	FARSA	K.VNLQMVYDSPLC*R.L	0.94	1.04	0.9	0.77686	0.912281	0.833333	3	0.840825	0.0680207	0.0808976	-0.250123
554	P49792	RANBP2 E3 SUMO-protein ligase RanBP2	RANBP2	K.MIC*QQVEAIKK.E	0.92	0.88	1.07	0.760331	0.77193	0.990741	3	0.841	0.129809	0.15435	-0.249822
395	P53007	SLC25A1 Tricarboxylate transport protein, mitochondrial	SLC25A1	R.GIGDC*VR.Q	0.82	1.08	0.97	0.677686	0.947368	0.898148	3	0.841068	0.143617	0.170755	-0.249706
414	P63244	RACK1 Receptor of activated protein C kinase 1	RACK1	R.FSPNSSNPIIVSC*GWDK.L	0.99	0.9	0.99	0.818182	0.789474	0.916667	3	0.841441	0.0667102	0.0792809	-0.249066
310	Q9Y2S7	POLDIP2 Polymerase delta-interacting protein 2	POLDIP2	R.DC*PHISQR.S	1.02	0.95	0.92	0.842975	0.833333	0.851852	3	0.84272	0.00926189	0.0109905	-0.246875
150	Q7Z2W4	ZC3HAV1 Zinc finger CCCH-type antiviral protein 1	ZC3HAV1	R.QQIC*NQQPPCSR.L	0.9	1.18	0.81	0.743802	1.03509	0.75	3	0.842963	0.166414	0.197415	-0.246459
345	P46779	RPL28 60S ribosomal protein L28	RPL28	R.NC*SSFLIK.R	1	0.95	0.94	0.826446	0.833333	0.87037	3	0.843383	0.0236238	0.0280107	-0.24574
456	Q9HA92	RSAD1 Radical S-adenosyl methionine domain-containing pr	RSAD1	R.THSAC*DALR.T	1.06	0.81	1.02	0.876033	0.710526	0.944444	3	0.843668	0.120271	0.142557	-0.245253
172	Q7L5Y9	MAEA Macrophage erythroblast attacher	MAEA	R.QDDKVVC*PR.T	1.2	0.88	0.83	0.991736	0.77193	0.768519	3	0.844061	0.127901	0.15153	-0.24458
149	Q9UG63	ABCF2 ATP-binding cassette sub-family F member 2	ABCF2	K.TLSFYFPPC*GK.I		1.07	0.81		0.938596	0.75	2	0.844298	0.133358	0.157951	-0.244175
139	P11586	MTHFD1 C-1-tetrahydrofolate synthase, cytoplasmic	MTHFD1	K.QGFGNLPIC*MAK.T	1.29	0.83	0.8	1.06612	0.72807	0.740741	3	0.844976	0.191618	0.226773	-0.243019
343	P36578	RPL4 60S ribosomal protein L4	RPL4	R.YAIC*SALAASALPALVMSK.G	1.04	0.92	0.94	0.859504	0.807018	0.87037	3	0.845631	0.0338785	0.0400629	-0.2419
266	P68363	TUBA1B Tubulin alpha-1B chain	TUBA1B	K.YMAC*CLLYR.G	1.1	0.92	0.89	0.909091	0.807018	0.824074	3	0.846728	0.0546775	0.0645751	-0.24003
408	P05141	SLC25A5 ADP/ATP translocase 2	SLC25A5	R.GLGDC*LVK.I	0.81	1.1	0.98	0.669421	0.964912	0.907407	3	0.847247	0.156663	0.184908	-0.239145
267	P62280	RPS11 40S ribosomal protein S11	RPS11	K.C*PFTGNVSIR.G	1.06	0.96	0.89	0.876033	0.842105	0.824074	3	0.847404	0.0263817	0.0311323	-0.238878
370	Q7RTV0	PHF5A PHD finger-like domain-containing protein 5A	PHF5A	R.ICDEC*NYGSYQGR.C	1.11	0.84	0.96	0.917355	0.736842	0.888889	3	0.847695	0.0970512	0.114488	-0.238382
209	Q99733	NAP1L4 Nucleosome assembly protein 1-like 4	NAP1L4	R.C*AHIEAK.F	1.16	0.91	0.85	0.958678	0.798246	0.787037	3	0.847987	0.0960248	0.113239	-0.237886
415	Q00610	CLTC Clathrin heavy chain 1	CLTC	K.VIQC*FAETGQVQK.I	0.93	0.98	0.99	0.768595	0.859649	0.916667	3	0.848304	0.074685	0.0880404	-0.237347
493	P16615	ATP2A2 Sarcoplasmic/endoplasmic reticulum calcium ATPase	ATP2A2	R.NYLEPGKEC*VQPATK.S	0.92	0.94	1.04	0.760331	0.824561	0.962963	3	0.849285	0.103554	0.121931	-0.235679
1192	P08865	RPSA 40S ribosomal protein SA	RPSA	R.YVDIAIPC*NNK.G	1.07	0.93		0.884298	0.815789		2	0.850043	0.0484425	0.0569883	-0.234391
265	A6NNZ2	cimageipi-sp|A6NNZ2|TBB8L_HUMAN Tubulin beta-8 chain-like protein LOC260334	cimageipi-sp|A6NNZ2|TBB8L_HUMAN	K.NMMAAC*DPR.H	1.14	0.9	0.89	0.942149	0.789474	0.824074	3	0.851899	0.0800505	0.0939671	-0.231246
1189	P34896	SHMT1 Serine hydroxymethyltransferase, cytosolic	SHMT1	K.LIIAGTSC*YSR.N	1.12	0.89		0.92562	0.780702		2	0.853161	0.102473	0.120109	-0.22911
393	Q9NRZ9	HELLS Lymphoid-specific helicase	HELLS	K.C*NGQPVPFQQPK.H	0.92	1.03	0.97	0.760331	0.903509	0.898148	3	0.853996	0.0811608	0.0950365	-0.227699
242	Q99714	HSD17B10 3-hydroxyacyl-CoA dehydrogenase type-2	HSD17B10	K.VC*NFLASQVPFPSR.L		1.03	0.87		0.903509	0.805556	2	0.854532	0.0692634	0.0810542	-0.226793
313	Q13283	G3BP1 Ras GTPase-activating protein-binding protein 1	G3BP1	K.VMSQNFTNC*HTK.I	0.96	1.05	0.92	0.793388	0.921053	0.851852	3	0.855431	0.0639073	0.0747077	-0.225277
358	P37268	FDFT1 Squalene synthase	FDFT1	R.TQNLPNC*QLISR.S	0.96	1.02	0.95	0.793388	0.894737	0.87963	3	0.855918	0.0546767	0.0638808	-0.224455
126	P53618	COPB1 Coatomer subunit beta	COPB1	R.C*IYNLLQSSSPAVK.Y		1.12	0.79		0.982456	0.731481	2	0.856969	0.177466	0.207086	-0.222685
110	Q8N6H7	ARFGAP2 ADP-ribosylation factor GTPase-activating protein	ARFGAP2	R.QHGC*TANDANTK.Y	1.06	1.12	0.77	0.876033	0.982456	0.712963	3	0.857151	0.135735	0.158356	-0.222379
176	Q8N163	CCAR2 Cell cycle and apoptosis regulator protein 2	CCAR2	R.VHLTPYTVDSPIC*DFLELQR.R		1.08	0.83		0.947368	0.768519	2	0.857943	0.126466	0.147406	-0.221046
225	Q86VP6	CAND1 Cullin-associated NEDD8-dissociated protein 1	CAND1	K.NC*IGDFLK.T	0.92	1.16	0.86	0.760331	1.01754	0.796296	3	0.858057	0.139285	0.162327	-0.220855
369	Q06265	EXOSC9 Exosome complex component RRP45	EXOSC9	-.MKETPLSNC*ER.R	1.18	0.81	0.96	0.975207	0.710526	0.888889	3	0.858207	0.134981	0.157283	-0.220602
309	Q13823	GNL2 Nucleolar GTP-binding protein 2	GNL2	K.KVC*NVAPIAGETK.V	1.14	0.89	0.92	0.942149	0.780702	0.851852	3	0.858234	0.0809125	0.0942779	-0.220557
337	P61077	UBE2D3 Ubiquitin-conjugating enzyme E2 D3	UBE2D3	K.VLLSICSLLC*DPNPDDPLVPEIAR.I	1.04		0.93	0.859504		0.861111	2	0.860308	0.00113631	0.00132081	-0.217075
357	O96008	TOMM40 Mitochondrial import receptor subunit TOM40 homolo	TOMM40	R.TPGAATASASGAAEDGAC*GCLPNPGTFEECHR.K	1.02	0.98	0.95	0.842975	0.859649	0.87963	3	0.860751	0.0183521	0.021321	-0.216332
315	Q01082	SPTBN1 Spectrin beta chain, non-erythrocytic 1	SPTBN1	K.FATDGEGYKPC*DPQVIR.D	0.95	1.08	0.92	0.785124	0.947368	0.851852	3	0.861448	0.0815468	0.0946625	-0.215164
449	P49327	FASN Fatty acid synthase	FASN	R.LGMLSPEGTC*K.A	0.98	0.96	1.01	0.809917	0.842105	0.935185	3	0.862403	0.0650538	0.0754332	-0.213567
458	P36578	RPL4 60S ribosomal protein L4	RPL4	R.GPC*IIYNEDNGIIK.A	1.06	0.88	1.02	0.876033	0.77193	0.944444	3	0.864136	0.0868705	0.100529	-0.21067
152	Q9P2I0	CPSF2 Cleavage and polyadenylation specificity factor su	CPSF2	R.LKDSLVSSLQFC*K.A	0.82	1.33	0.81	0.677686	1.16667	0.75	3	0.864784	0.263926	0.305193	-0.209588
373	P62829	RPL23 60S ribosomal protein L23	RPL23	K.EC*ADLWPR.I	1.08	0.93	0.96	0.892562	0.815789	0.888889	3	0.865747	0.0433033	0.0500184	-0.207983
807	P56182	RRP1 Ribosomal RNA processing protein 1 homolog A	RRP1	K.LQDLAGGIFPEDEIPEKAC*R.R	1.16	0.56	1.24	0.958678	0.491228	1.14815	3	0.866018	0.33812	0.390431	-0.207531
378	P50914	RPL14 60S ribosomal protein L14	RPL14	R.ALVDGPC*TQVR.R	1.03	0.98	0.96	0.85124	0.859649	0.888889	3	0.866593	0.0197617	0.0228039	-0.206574
584	P09543	CNP 2,3-cyclic-nucleotide 3-phosphodiesterase	CNP	K.RLDEDLAAYC*R.R	0.89		1.08	0.735537		1	2	0.867769	0.187003	0.215499	-0.204618
377	Q9HBM1	SPC25 Kinetochore protein Spc25	SPC25	K.STDTSC*QMAGLRDTYKDSIK.A		0.97	0.96		0.850877	0.888889	2	0.869883	0.0268783	0.0308988	-0.201107
174	Q1KMD3	HNRNPUL2 Heterogeneous nuclear ribonucleoprotein U-like pro	HNRNPUL2	K.GKVC*FEAK.V	1.18	0.99	0.83	0.975207	0.868421	0.768519	3	0.870715	0.103363	0.118711	-0.199727
476	P83731	RPL24 60S ribosomal protein L24	RPL24	-.MKVELC*SFSGYK.I	1.11	0.85	1.03	0.917355	0.745614	0.953704	3	0.872224	0.111144	0.127426	-0.197229
284	Q8N163	CCAR2 Cell cycle and apoptosis regulator protein 2	CCAR2	R.VVTQNIC*QYR.S		1.04	0.9		0.912281	0.833333	2	0.872807	0.0558242	0.0639594	-0.196265
1228	Q7Z478	DHX29 ATP-dependent RNA helicase DHX29	DHX29	K.C*NLGSPEDFLSK.A	0.98	1.07		0.809917	0.938596		2	0.874257	0.0909899	0.104077	-0.193871
628	Q9BQG0	MYBBP1A Myb-binding protein 1A	MYBBP1A	R.HYGEHVC*TAK.L	0.89	0.97	1.12	0.735537	0.850877	1.03704	3	0.874484	0.15213	0.173965	-0.193496
1191	Q9H4K7	MTG2 Mitochondrial ribosome-associated GTPase 2	MTG2	R.APVTC*TPGQPGQQR.V	1.14	0.92		0.942149	0.807018		2	0.874583	0.0955522	0.109255	-0.193333
178	O43439	CBFA2T2 Protein CBFA2T2	CBFA2T2	R.FSNGPASSTSSALTNQQLPATC*GAR.Q	1.19		0.83	0.983471		0.768519	2	0.875995	0.151994	0.173511	-0.191006
1213	O75521	ECI2 Enoyl-CoA delta isomerase 2, mitochondrial	ECI2	R.WLSDEC*TNAVVNFLSR.K	1.05	1.01		0.867769	0.885965		2	0.876867	0.0128667	0.0146735	-0.18957
328	Q01581	HMGCS1 Hydroxymethylglutaryl-CoA synthase, cytoplasmic	HMGCS1	K.LSIQC*YLSALDR.C	1.04	1.04	0.93	0.859504	0.912281	0.861111	3	0.877632	0.0300174	0.0342028	-0.188312
1193	Q9BVQ7	SPATA5L1 Spermatogenesis-associated protein 5-like protein	SPATA5L1	K.TVKPSLSC*K.D	1.14	0.93		0.942149	0.815789		2	0.878969	0.0893495	0.101653	-0.186116
380	Q9NPG3	UBN1 Ubinuclein-1	UBN1	K.ASPTQC*HR.S	1.05	1.01	0.96	0.867769	0.885965	0.888889	3	0.880874	0.0114435	0.0129911	-0.182992
226	O00410	IPO5 Importin-5	IPO5	K.LC*GDTSLNNMQR.Q	0.91	1.26	0.86	0.752066	1.10526	0.796296	3	0.884542	0.192425	0.217542	-0.176998
587	O00571	DDX3X ATP-dependent RNA helicase DDX3X	DDX3X	K.IGLDFC*K.Y	0.91	1.02	1.09	0.752066	0.894737	1.00926	3	0.885354	0.128853	0.145538	-0.175674
376	P36578	RPL4 60S ribosomal protein L4	RPL4	R.SGQGAFGNMC*R.G	1.12	0.96	0.96	0.92562	0.842105	0.888889	3	0.885538	0.041858	0.0472684	-0.175374
375	P78417	GSTO1 Glutathione S-transferase omega-1	GSTO1	R.FC*PFAER.T	1.15	0.94	0.96	0.950413	0.824561	0.888889	3	0.887955	0.0629311	0.070872	-0.171442
425	Q99836	MYD88 Myeloid differentiation primary response protein M	MYD88	R.FITVCDYTNPC*TK.S	1.04		0.99	0.859504		0.916667	2	0.888085	0.04042	0.0455137	-0.17123
312	Q9NYF8	BCLAF1 Bcl-2-associated transcription factor 1	BCLAF1	R.C*DSADLRHDIDR.R	1.09	1.04	0.92	0.900826	0.912281	0.851852	3	0.88832	0.0320971	0.0361324	-0.170849
481	P09496	CLTA Clathrin light chain A	CLTA	R.LC*DFNPK.S	0.96	1.05	1.03	0.793388	0.921053	0.953704	3	0.889382	0.0847204	0.0952576	-0.169126
372	Q9NZB2	FAM120A Constitutive coactivator of PPAR-gamma-like protei	FAM120A	R.VAAASGHC*GAFSGSDSSR.T	1.19	0.91	0.96	0.983471	0.798246	0.888889	3	0.890202	0.0926197	0.104043	-0.167796
404	P62753	RPS6 40S ribosomal protein S6	RPS6	R.GC*IVDANLSVLNLVIVK.K		1	0.98		0.877193	0.907407	2	0.8923	0.0213648	0.0239435	-0.164399
784	P55212	CASP6 Caspase-6	CASP6	R.GTC*ADRDNLTR.R	1.8	0.07	1.22	1.4876	0.0614035	1.12963	3	0.892879	0.74199	0.831009	-0.163464
591	Q9P2X0	DPM3 Dolichol-phosphate mannosyltransferase subunit 3	DPM3	R.VATFHDC*EDAAR.E	0.79	1.16	1.09	0.652893	1.01754	1.00926	3	0.893232	0.208181	0.233065	-0.162893
374	Q6UB35	MTHFD1L Monofunctional C1-tetrahydrofolate synthase, mitoc	MTHFD1L	K.VGC*GSPR.I	1.18	0.93	0.96	0.975207	0.815789	0.888889	3	0.893295	0.0797999	0.089332	-0.162791
500	O75822	EIF3J Eukaryotic translation initiation factor 3 subunit	EIF3J	K.ITNSLTVLC*SEK.Q	0.89	1.12	1.04	0.735537	0.982456	0.962963	3	0.893652	0.137278	0.153615	-0.162215
542	Q01518	CAP1 Adenylyl cyclase-associated protein 1	CAP1	K.GKINSITVDNC*KK.L	0.85	1.14	1.06	0.702479	1	0.981481	3	0.894654	0.166685	0.186313	-0.160599
316	P05388	RPLP0 60S acidic ribosomal protein P0	RPLP0	R.AGAIAPC*EVTVPAQNTGLGPEK.T	0.98	1.17	0.92	0.809917	1.02632	0.851852	3	0.896028	0.114764	0.128081	-0.158384
438	O15372	EIF3H Eukaryotic translation initiation factor 3 subunit	EIF3H	K.LMEVC*KEKDFSPEALKK.A	1.05	1.02	1	0.867769	0.894737	0.925926	3	0.896144	0.0291042	0.0324771	-0.158198
392	Q9NR30	DDX21 Nucleolar RNA helicase 2	DDX21	R.TIIFC*ETKK.E		1.02	0.97		0.894737	0.898148	2	0.896442	0.00241216	0.00269081	-0.157717
555	Q9UHX1	PUF60 Poly(U)-binding-splicing factor PUF60	PUF60	K.SC*TLARDPTTGK.H		0.92	1.07		0.807018	0.990741	2	0.898879	0.129912	0.144527	-0.153801
492	P42695	NCAPD3 Condensin-2 complex subunit D3	NCAPD3	R.NKDTPAC*SR.R	1.2	0.85	1.04	0.991736	0.745614	0.962963	3	0.900104	0.134564	0.149498	-0.151836
179	Q00403	GTF2B Transcription initiation factor IIB	GTF2B	R.FCSNLC*LPK.Q	1.25		0.83	1.03306		0.768519	2	0.900788	0.187058	0.20766	-0.15074
384	P53618	COPB1 Coatomer subunit beta	COPB1	K.KPITDDDVDRISLC*LK.V	0.99	1.14	0.96	0.818182	1	0.888889	3	0.902357	0.0916543	0.101572	-0.14823
576	Q9NTJ3	SMC4 Structural maintenance of chromosomes protein 4	SMC4	R.FSC*IIGPNGSGK.S	1.07	0.94	1.08	0.884298	0.824561	1	3	0.902953	0.0891947	0.0987811	-0.147277
556	P35998	PSMC2 26S proteasome regulatory subunit 7	PSMC2	R.LC*PNSTGAEIR.S	1.05	0.97	1.07	0.867769	0.850877	0.990741	3	0.903129	0.0763427	0.0845314	-0.146996
436	P36578	RPL4 60S ribosomal protein L4	RPL4	R.FC*IWTESAFR.K	1.1	1	1	0.909091	0.877193	0.925926	3	0.90407	0.0247514	0.0273778	-0.145494
330	P10515	DLAT Dihydrolipoyllysine-residue acetyltransferase comp	DLAT	K.ASALAC*LK.V		1.08	0.93		0.947368	0.861111	2	0.90424	0.0609931	0.0674524	-0.145223
709	Q9NR30	DDX21 Nucleolar RNA helicase 2	DDX21	K.GKLGVC*FDVPTASVTEIQEK.W	0.89		1.16	0.735537		1.07407	2	0.904806	0.239382	0.264567	-0.14432
307	P62913	RPL11 60S ribosomal protein L11	RPL11	K.LC*LNICVGESGDR.L	1.32	0.88	0.92	1.09091	0.77193	0.851852	3	0.904897	0.165974	0.183417	-0.144175
642	Q9NR56	MBNL1 Muscleblind-like protein 1	MBNL1	R.GTC*SRPDTECK.F	1.16	0.81	1.13	0.958678	0.710526	1.0463	3	0.905167	0.174164	0.19241	-0.143744
359	Q06323	PSME1 Proteasome activator complex subunit 1	PSME1	K.VDVFREDLC*TK.T	1.14	1.02	0.95	0.942149	0.894737	0.87963	3	0.905505	0.032621	0.0360251	-0.143205
360	Q9UHD8	SEPT9 Septin-9	2020-09-09	K.LTVIDTPGFGDHINNENC*WQPIMK.F	1.08	1.08	0.95	0.892562	0.947368	0.87963	3	0.90652	0.0359619	0.0396702	-0.141589
332	Q5TFE4	NT5DC1 5-nucleotidase domain-containing protein 1	NT5DC1	K.HFLSDTGMAC*R.S	1.06	1.12	0.93	0.876033	0.982456	0.861111	3	0.906533	0.0661729	0.0729956	-0.141568
301	Q9NQ88	TIGAR Fructose-2,6-bisphosphatase TIGAR	TIGAR	K.EADQKEQFSQGSPSNC*LETSLAEIFPLGK.N	1.18		0.91	0.975207		0.842593	2	0.9089	0.0937723	0.103171	-0.137807
585	Q96FJ0	STAMBPL1 AMSH-like protease	STAMBPL1	K.LGC*NITISEDITPR.R	0.99		1.08	0.818182		1	2	0.909091	0.128565	0.141421	-0.137504
505	P08238	HSP90AB1 Heat shock protein HSP 90-beta	HSP90AB1	R.GFEVVYMTEPIDEYC*VQQLK.E	0.84	1.22	1.04	0.694215	1.07018	0.962963	3	0.909118	0.193678	0.213039	-0.137461
320	Q15050	RRS1 Ribosome biogenesis regulatory protein homolog	RRS1	R.C*AGPTPEAELQALAR.D	1.17		0.92	0.966942		0.851852	2	0.909397	0.0813811	0.0894891	-0.137018
437	Q9BWD1	ACAT2 Acetyl-CoA acetyltransferase, cytosolic	ACAT2	R.ATVAPEDVSEVIFGHVLAAGC*GQNPVR.Q	1.12	1	1	0.92562	0.877193	0.925926	3	0.90958	0.028048	0.0308363	-0.136728
350	Q9NVV4	MTPAP Poly(A) RNA polymerase, mitochondrial	MTPAP	R.FSHQASGFQC*DLTTNNR.I	1.15		0.94	0.950413		0.87037	2	0.910392	0.0565988	0.0621698	-0.135441
495	P25788	PSMA3 Proteasome subunit alpha type-3	PSMA3	R.C*KDGVVFGVEK.L		0.98	1.04		0.859649	0.962963	2	0.911306	0.0730539	0.080164	-0.133992
499	Q86YV0	RASAL3 RAS protein activator like-3	RASAL3	R.LC*GALEPALPAQAK.E	1.01	1.07	1.04	0.834711	0.938596	0.962963	3	0.91209	0.0681109	0.0746757	-0.132752
426	Q6I9Y2	THOC7 THO complex subunit 7 homolog	THOC7	R.MLSTLSQC*EFSMGK.T	1.1		0.99	0.909091		0.916667	2	0.912879	0.00535687	0.00586811	-0.131505
224	P26599	PTBP1 Polypyrimidine tract-binding protein 1	PTBP1	K.LSLDGQNIYNAC*CTLR.I	1.13	1.15	0.86	0.933884	1.00877	0.796296	3	0.912984	0.107769	0.11804	-0.131338
540	P34932	HSPA4 Heat shock 70 kDa protein 4	HSPA4	R.GC*ALQCAILSPAFK.V	0.96	1.1	1.06	0.793388	0.964912	0.981481	3	0.913261	0.104143	0.114034	-0.130901
361	Q9UJX3	ANAPC7 Anaphase-promoting complex subunit 7	ANAPC7	R.AISTIC*SLEKK.S		1.08	0.95		0.947368	0.87963	2	0.913499	0.0478986	0.0524342	-0.130525
470	P40937	RFC5 Replication factor C subunit 5	RFC5	K.VTEETVYTC*TGHPLK.S	1.07		1.02	0.884298		0.944444	2	0.914371	0.0425303	0.0465132	-0.129148
379	P62987	UBA52 Ubiquitin-60S ribosomal protein L40	UBA52	R.QLAQKYNC*DK.M	1.2	0.99	0.96	0.991736	0.868421	0.888889	3	0.916348	0.0660843	0.072117	-0.126032
213	Q00610	CLTC Clathrin heavy chain 1	CLTC	R.AHIAQLC*EK.A	1.09	1.21	0.85	0.900826	1.0614	0.787037	3	0.916422	0.137847	0.150418	-0.125915
356	Q6NZY4	ZCCHC8 Zinc finger CCHC domain-containing protein 8	ZCCHC8	R.IFGSIPMQAC*QQK.D	1.32	0.89	0.95	1.09091	0.780702	0.87963	3	0.91708	0.158458	0.172786	-0.12488
282	Q9NPD3	EXOSC4 Exosome complex component RRP41	EXOSC4	K.SC*EMGLQLR.Q	1.26	1	0.9	1.04132	0.877193	0.833333	3	0.917283	0.109637	0.119524	-0.124561
809	P50570	DNM2 Dynamin-2	DNM2	K.TEHAEFLHC*K.S	0.89	0.99	1.24	0.735537	0.868421	1.14815	3	0.917369	0.210615	0.229586	-0.124426
227	Q14919	DRAP1 Dr1-associated corepressor	DRAP1	K.KAC*QVTQSR.N	1.03	1.26	0.86	0.85124	1.10526	0.796296	3	0.9176	0.164827	0.179628	-0.124063
479	P63244	RACK1 Receptor of activated protein C kinase 1	RACK1	K.LWNTLGVC*K.Y	1.13	0.99	1.03	0.933884	0.868421	0.953704	3	0.91867	0.0446307	0.0485818	-0.122382
461	P45880	VDAC2 Voltage-dependent anion-selective channel protein	VDAC2	K.SC*SGVEFSTSGSSNTDTGK.V	1.05	1.08	1.02	0.867769	0.947368	0.944444	3	0.91986	0.0451366	0.0490689	-0.120513
644	Q6NUQ4	TMEM214 Transmembrane protein 214	TMEM214	R.SSGFLPASQQAC*AK.L	1.12	0.9	1.13	0.92562	0.789474	1.0463	3	0.920463	0.128489	0.139592	-0.119568
346	Q9BQE3	TUBA1C Tubulin alpha-1C chain	TUBA1C	K.AYHEQLTVAEITNAC*FEPANQMVK.C	1.27	0.96	0.94	1.04959	0.842105	0.87037	3	0.920687	0.112521	0.122214	-0.119217
409	Q13155	AIMP2 Aminoacyl tRNA synthase complex-interacting multif	AIMP2	R.VELPTC*MYR.L	1.07	1.11	0.98	0.884298	0.973684	0.907407	3	0.921796	0.046398	0.0503344	-0.11748
391	P55263	ADK Adenosine kinase	ADK	R.TGC*TFPEKPDFH.-	1.21	0.99	0.97	1	0.868421	0.898148	3	0.92219	0.0690055	0.0748278	-0.116864
347	Q00403	GTF2B Transcription initiation factor IIB	GTF2B	R.TFKEIC*AVSR.I	1.14	1.09	0.94	0.942149	0.95614	0.87037	3	0.922886	0.0460152	0.0498601	-0.115775
450	P15121	AKR1B1 Aldose reductase	AKR1B1	R.VC*ALLSCTSHK.D	1.18	0.98	1.01	0.975207	0.859649	0.935185	3	0.923347	0.0586813	0.0635528	-0.115055
534	Q5VTL8	PRPF38B Pre-mRNA-splicing factor 38B	PRPF38B	R.KTAGQTGMC*GGVR.G	1.19	0.92	1.06	0.983471	0.807018	0.981481	3	0.92399	0.101306	0.10964	-0.114051
891	P33316	DUT Deoxyuridine 5-triphosphate nucleotidohydrolase,	DUT	R.IAQLIC*ER.I	0.78		1.3	0.644628		1.2037	2	0.924166	0.395326	0.427765	-0.113776
535	O00571	DDX3X ATP-dependent RNA helicase DDX3X	DDX3X	R.WC*DKSDEDDWSKPLPPSER.L	1.14	0.97	1.06	0.942149	0.850877	0.981481	3	0.924836	0.0670013	0.0724467	-0.112731
405	P27635	RPL10 60S ribosomal protein L10	RPL10	R.IC*ANKYMVK.S	1.18	1.02	0.98	0.975207	0.894737	0.907407	3	0.925784	0.0432679	0.0467365	-0.111253
796	Q6P2Q9	PRPF8 Pre-mRNA-processing-splicing factor 8	PRPF8	R.GATVDKTVC*KK.N	0.88	1.04	1.23	0.727273	0.912281	1.13889	3	0.926147	0.206158	0.222598	-0.110686
406	P49588	AARS Alanine--tRNA ligase, cytoplasmic	AARS	K.C*LSVMEAK.V	1.14	1.06	0.98	0.942149	0.929825	0.907407	3	0.92646	0.0176133	0.0190114	-0.110199
451	P50995	ANXA11 Annexin A11	ANXA11	K.FNAVLC*SR.S	1.13	1.04	1.01	0.933884	0.912281	0.935185	3	0.927117	0.0128648	0.0138762	-0.109177
643	Q8TDN6	BRIX1 Ribosome biogenesis protein BRX1 homolog	BRIX1	R.DRIPGPVC*K.G	1.19	0.86	1.13	0.983471	0.754386	1.0463	3	0.928051	0.153644	0.165555	-0.107724
563	P10809	HSPD1 60 kDa heat shock protein, mitochondrial	HSPD1	R.C*IPALDSLTPANEDQK.I	0.92	1.18	1.07	0.760331	1.03509	0.990741	3	0.92872	0.147505	0.158827	-0.106685
327	Q99832	CCT7 T-complex protein 1 subunit eta	CCT7	K.EGTDSSQGIPQLVSNISAC*QVIAEAVR.T	1.24	1.03	0.93	1.02479	0.903509	0.861111	3	0.929804	0.0849504	0.0913637	-0.105001
482	Q9Y277	VDAC3 Voltage-dependent anion-selective channel protein	VDAC3	K.SC*SGVEFSTSGHAYTDTGK.A	1.11	1.05	1.03	0.917355	0.921053	0.953704	3	0.930704	0.020004	0.0214934	-0.103606
477	P23921	RRM1 Ribonucleoside-diphosphate reductase large subunit	RRM1	R.NTAAMVCSLENRDEC*LMCGS.-	1.25	0.92	1.03	1.03306	0.807018	0.953704	3	0.93126	0.114679	0.123144	-0.102745
285	O95299	NDUFA10 NADH dehydrogenase [ubiquinone] 1 alpha subcomplex	NDUFA10	R.KQC*VDHYNEVK.S	1.24	1.07	0.9	1.02479	0.938596	0.833333	3	0.932241	0.0958881	0.102858	-0.101225
619	P04899	GNAI2 Guanine nucleotide-binding protein G(i) subunit al	GNAI2	K.NNLKDC*GLF.-	1.06	1.02	1.11	0.876033	0.894737	1.02778	3	0.932849	0.0827407	0.0886968	-0.100284
397	Q92556	ELMO1 Engulfment and cell motility protein 1	ELMO1	R.EDKHEC*PFGR.S	0.92	1.3	0.97	0.760331	1.14035	0.898148	3	0.932943	0.192385	0.206213	-0.100139
575	P31943	HNRNPH1 Heterogeneous nuclear ribonucleoprotein H	HNRNPH1	R.DLNYC*FSGMSDHR.Y	1.19	0.93	1.08	0.983471	0.815789	1	3	0.933087	0.101918	0.109227	-0.0999167
1242	P35250	RFC2 Replication factor C subunit 2	RFC2	K.TTSILC*LAR.A	1.07	1.12		0.884298	0.982456		2	0.933377	0.0694086	0.0743629	-0.0994684
1276	Q08AG7	MZT1 Mitotic-spindle organizing protein 1	MZT1	R.LC*EQGINPEALSSVIK.E	0.87	1.31		0.719008	1.14912		2	0.934066	0.304137	0.325606	-0.0984043
478	Q8N1F7	NUP93 Nuclear pore complex protein Nup93	NUP93	K.SSGQSAQLLSHEPGDPPC*LR.R	1.25	0.93	1.03	1.03306	0.815789	0.953704	3	0.934184	0.109942	0.117687	-0.0982219
1210	Q96I24	FUBP3 Far upstream element-binding protein 3	FUBP3	R.SSGC*FPNMAAK.V	1.2	1		0.991736	0.877193		2	0.934464	0.0809938	0.0866741	-0.0977886
460	Q15365	PCBP1 Poly(rC)-binding protein 1	PCBP1	R.LVVPATQC*GSLIGK.G	1.22	0.97	1.02	1.00826	0.850877	0.944444	3	0.934529	0.0791608	0.0847066	-0.0976891
420	O60610	DIAPH1 Protein diaphanous homolog 1	DIAPH1	K.AGC*AVTSLLASELTK.D	0.99	1.22	0.99	0.818182	1.07018	0.916667	3	0.935008	0.126994	0.135821	-0.0969494
396	P50990	CCT8 T-complex protein 1 subunit theta	CCT8	K.IAVYSC*PFDGMITETK.G	1.14	1.1	0.97	0.942149	0.964912	0.898148	3	0.93507	0.0339403	0.0362971	-0.0968541
1218	P35250	RFC2 Replication factor C subunit 2	RFC2	R.FALAC*NASDKIIEPIQSR.C	1.17	1.03		0.966942	0.903509		2	0.935225	0.0448542	0.0479608	-0.0966139
601	Q9BXP5	SRRT Serrate RNA effector molecule homolog	SRRT	K.TC*SLFMR.N	1.08	1.02	1.1	0.892562	0.894737	1.01852	3	0.935272	0.0721014	0.0770913	-0.0965414
541	P62888	RPL30 60S ribosomal protein L30	RPL30	K.YYRVC*TLAIIDPGDSDIIR.S	1.04	1.1	1.06	0.859504	0.964912	0.981481	3	0.935299	0.0661613	0.0707381	-0.0965
418	Q8WUM4	PDCD6IP Programmed cell death 6-interacting protein	PDCD6IP	K.LANQAADYFGDAFKQC*QYKDTLPK.E	1.07	1.15	0.99	0.884298	1.00877	0.916667	3	0.936579	0.064582	0.0689552	-0.0945279
515	O14929	HAT1 Histone acetyltransferase type B catalytic subunit	HAT1	K.VDENFDC*VEADDVEGK.I	1.2	0.97	1.05	0.991736	0.850877	0.972222	3	0.938278	0.0763178	0.0813381	-0.0919122
759	P15880	RPS2 40S ribosomal protein S2	RPS2	R.C*GSVLVR.L	1.09	0.92	1.2	0.900826	0.807018	1.11111	3	0.939652	0.15572	0.165721	-0.089802
484	Q9Y277	VDAC3 Voltage-dependent anion-selective channel protein	VDAC3	K.YMLDC*R.T	1.08	1.11	1.03	0.892562	0.973684	0.953704	3	0.939983	0.0422657	0.0449643	-0.089293
105	B5ME19	EIF3CL Eukaryotic translation initiation factor 3 subunit	EIF3CL	K.TC*HSFIINEK.M	1.15	1.33	0.76	0.950413	1.16667	0.703704	3	0.940261	0.231648	0.246366	-0.0888665
522	Q00839	HNRNPU Heterogeneous nuclear ribonucleoprotein U	HNRNPU	K.GKVC*FEMK.V	0.88	1.28	1.05	0.727273	1.12281	0.972222	3	0.940767	0.199634	0.212204	-0.0880901
602	P63244	RACK1 Receptor of activated protein C kinase 1	RACK1	K.YTVQDESHSEWVSC*VR.F	1.1	1.02	1.1	0.909091	0.894737	1.01852	3	0.940782	0.0677032	0.0719648	-0.0880675
416	Q9NYK5	MRPL39 39S ribosomal protein L39, mitochondrial	MRPL39	K.FLTFKDC*DPGEVNK.A		1.1	0.99		0.964912	0.916667	2	0.940789	0.0341148	0.0362619	-0.0880562
329	Q6PKG0	LARP1 La-related protein 1	LARP1	R.TASISSSPSEGTPTVGSYGC*TPQSLPK.F	1.25	1.06	0.93	1.03306	0.929825	0.861111	3	0.941331	0.086549	0.0919432	-0.0872257
463	Q9BXJ9	NAA15 N-alpha-acetyltransferase 15, NatA auxiliary subun	NAA15	R.LFNTAVC*ESK.D	1.1	1.11	1.02	0.909091	0.973684	0.944444	3	0.942407	0.0323448	0.0343215	-0.0855786
696	P17844	DDX5 Probable ATP-dependent RNA helicase DDX5	DDX5	K.STC*IYGGAPK.G	1.04	1.02	1.16	0.859504	0.894737	1.07407	3	0.942772	0.115068	0.122053	-0.0850197
857	P51610	HCFC1 Host cell factor 1	HCFC1	R.VAGINAC*GR.G	0.97	0.96	1.28	0.801653	0.842105	1.18519	3	0.942981	0.210728	0.22347	-0.0846992
741	P49411	TUFM Elongation factor Tu, mitochondrial	TUFM	K.KGDEC*ELLGHSK.N	1.02	1.01	1.19	0.842975	0.885965	1.10185	3	0.943597	0.138728	0.14702	-0.0837568
331	P07814	EPRS Bifunctional glutamate/proline--tRNA ligase	EPRS	K.LSSC*DSFTSTINELNHCLSLR.T	1.22	1.1	0.93	1.00826	0.964912	0.861111	3	0.944763	0.0756177	0.0800388	-0.0819762
417	Q9UNM6	PSMD13 26S proteasome non-ATPase regulatory subunit 13	PSMD13	K.DRLEFWC*TDVK.S		1.11	0.99		0.973684	0.916667	2	0.945175	0.0403175	0.0426561	-0.081346
498	P13639	EEF2 Elongation factor 2	EEF2	R.LMEPIYLVEIQC*PEQVVGGIYGVLNR.K		1.06	1.04		0.929825	0.962963	2	0.946394	0.0234324	0.0247597	-0.0794875
929	P49736	MCM2 DNA replication licensing factor MCM2	MCM2	R.C*TVIAAANPIGGR.Y	0.79		1.34	0.652893		1.24074	2	0.946817	0.415671	0.43902	-0.078843
268	P36969	GPX4 Phospholipid hydroperoxide glutathione peroxidase,	GPX4	R.YAEC*GLR.I	1.23	1.14	0.89	1.01653	1	0.824074	3	0.946868	0.106663	0.112648	-0.0787653
496	O43390	HNRNPR Heterogeneous nuclear ribonucleoprotein R	HNRNPR	K.SAFLC*GVMK.T	1.19	1.02	1.04	0.983471	0.894737	0.962963	3	0.947057	0.0464563	0.0490534	-0.0784769
286	P46013	MKI67 Proliferation marker protein Ki-67	MKI67	R.SQHDILQMIC*SK.R	1.03	1.32	0.9	0.85124	1.15789	0.833333	3	0.947489	0.182436	0.192547	-0.0778185
846	Q15005	SPCS2 Signal peptidase complex subunit 2	SPCS2	R.SGGSGGC*SGAGGASNC*GTGSGR.S	1.21	0.76	1.27	1	0.666667	1.17593	3	0.947531	0.258652	0.272975	-0.0777552
269	P04406	GAPDH Glyceraldehyde-3-phosphate dehydrogenase	GAPDH	R.VPTANVSVVDLTC*R.L	1.18	1.19	0.89	0.975207	1.04386	0.824074	3	0.947713	0.112443	0.118646	-0.0774772
333	P13489	RNH1 Ribonuclease inhibitor	RNH1	R.SNELGDVGVHCVLQGLQTPSC*K.I		1.18	0.93		1.03509	0.861111	2	0.948099	0.12302	0.129754	-0.0768898
364	P46379	BAG6 Large proline-rich protein BAG6	BAG6	R.CNLAC*TPPR.H		1.16	0.95		1.01754	0.87963	2	0.948587	0.0975201	0.102806	-0.0761484
773	P52272	HNRNPM Heterogeneous nuclear ribonucleoprotein M	HNRNPM	K.DKFNEC*GHVLYADIK.M	1.06	0.97	1.21	0.876033	0.850877	1.12037	3	0.949094	0.148862	0.156847	-0.0753778
421	O60264	SMARCA5 SWI/SNF-related matrix-associated actin-dependent	SMARCA5	K.ATNVC*TR.F	1.01	1.25	0.99	0.834711	1.09649	0.916667	3	0.94929	0.133905	0.141058	-0.0750799
516	P27635	RPL10 60S ribosomal protein L10	RPL10	K.AKVDEFPLC*GHMVSDEYEQLSSEALEAAR.I	1.24	0.97	1.05	1.02479	0.850877	0.972222	3	0.949298	0.0891957	0.0939596	-0.0750677
80	Q12962	TAF10 Transcription initiation factor TFIID subunit 10	TAF10	K.FISDIANDALQHC*K.M	1.38	1.18	0.73	1.1405	1.03509	0.675926	3	0.950503	0.243562	0.256245	-0.0732367
163	Q01813	PFKP ATP-dependent 6-phosphofructokinase, platelet type	PFKP	K.YAYLNVVGMVGSIDNDFC*GTDMTIGTDSALHR.I	1.26	1.2	0.82	1.04132	1.05263	0.759259	3	0.951071	0.16621	0.174761	-0.072375
667	Q15052	ARHGEF6 Rho guanine nucleotide exchange factor 6	ARHGEF6	K.ATEDQLSERPC*GR.S	1.14	0.98	1.14	0.942149	0.859649	1.05556	3	0.952451	0.0983587	0.103269	-0.070283
1234	Q99081	TCF12 Transcription factor 12	TCF12	R.DTGLPGC*QSSLLR.Q	1.15	1.09		0.950413	0.95614		2	0.953277	0.00404969	0.00424818	-0.0690329
650	P61978	HNRNPK Heterogeneous nuclear ribonucleoprotein K	HNRNPK	K.LFQEC*CPHSTDR.V	0.99	1.14	1.13	0.818182	1	1.0463	3	0.954826	0.12058	0.126285	-0.0666902
480	P18621	RPL17 60S ribosomal protein L17	RPL17	R.YNGGVGRC*AQAK.Q	1.23	1.02	1.03	1.01653	0.894737	0.953704	3	0.95499	0.0609062	0.0637768	-0.0664427
385	Q9NX24	NHP2 H/ACA ribonucleoprotein complex subunit 2	NHP2	K.IKADPDGPEAQAEAC*SGER.T	1.08	1.24	0.96	0.892562	1.08772	0.888889	3	0.95639	0.113749	0.118936	-0.064329
464	P62306	SNRPF Small nuclear ribonucleoprotein F	SNRPF	R.C*NNVLYIR.G	1.16	1.11	1.02	0.958678	0.973684	0.944444	3	0.958935	0.0146216	0.0152477	-0.0604944
630	P28838	LAP3 Cytosol aminopeptidase	LAP3	R.SAGAC*TAAAFLK.E	1.06	1.11	1.12	0.876033	0.973684	1.03704	3	0.962251	0.0811086	0.0842904	-0.0555142
381	Q9NVT9	ARMC1 Armadillo repeat-containing protein 1	ARMC1	R.YLAEC*R.A	1.23	1.12	0.96	1.01653	0.982456	0.888889	3	0.962625	0.0660905	0.0686566	-0.0549547
314	P04350	TUBB4A Tubulin beta-4A chain	TUBB4A	K.VSDTVVEPYNATLSVHQLVENTDETYC*IDNEALYDICFR.T	1.34	1.06	0.92	1.10744	0.929825	0.851852	3	0.963038	0.13099	0.136018	-0.0543352
465	P40937	RFC5 Replication factor C subunit 5	RFC5	K.TSTILAC*AK.Q		1.12	1.02		0.982456	0.944444	2	0.96345	0.0268783	0.027898	-0.0537179
462	P29401	TKT Transketolase	TKT	R.MAAISESNINLC*GSHCGVSIGEDGPSQMALEDLAMFR.S	1.21	1.08	1.02	1	0.947368	0.944444	3	0.963938	0.0312651	0.0324348	-0.0529883
344	P43243	MATR3 Matrin-3	MATR3	R.EDAMAMVDHC*LKK.A	1.46	0.93	0.94	1.20661	0.815789	0.87037	3	0.964257	0.211652	0.219497	-0.0525102
537	O95373	IPO7 Importin-7	IPO7	R.GIDQC*IPLFVEAALER.L	1.18	1.07	1.06	0.975207	0.938596	0.981481	3	0.965095	0.0231617	0.0239994	-0.0512573
383	Q8WZ42	TTN Titin	TTN	K.GDATQLAC*K.V	1.23	1.13	0.96	1.01653	0.991228	0.888889	3	0.965549	0.0675838	0.0699952	-0.0505792
348	Q9BZX2	UCK2 Uridine-cytidine kinase 2	UCK2	R.QTNGC*LNGYTPSR.K	1.21	1.17	0.94	1	1.02632	0.87037	3	0.965562	0.0834819	0.0864594	-0.0505591
987	Q9Y5M8	SRPRB Signal recognition particle receptor subunit beta	SRPRB	K.NTPSFLIAC*NK.Q	1	0.87	1.42	0.826446	0.763158	1.31481	3	0.96814	0.301893	0.311827	-0.0467129
497	Q1KMD3	HNRNPUL2 Heterogeneous nuclear ribonucleoprotein U-like pro	HNRNPUL2	K.VTQNLPMKEGC*TEVSLLR.V	1.25	1.04	1.04	1.03306	0.912281	0.962963	3	0.969434	0.060648	0.0625603	-0.0447857
633	P07900	HSP90AA1 Heat shock protein HSP 90-alpha	HSP90AA1	K.TKFENLC*K.I	0.98	1.21	1.12	0.809917	1.0614	1.03704	3	0.969453	0.138698	0.143068	-0.0447577
560	P17812	CTPS1 CTP synthase 1	CTPS1	R.LLETC*SIALVGK.Y	1.1	1.15	1.07	0.909091	1.00877	0.990741	3	0.969535	0.0531164	0.0547855	-0.0446358
394	P22090	RPS4Y1 40S ribosomal protein S4, Y isoform 1	RPS4Y1	K.YALTGDEVKKIC*MQR.F	1.33	1.04	0.97	1.09917	0.912281	0.898148	3	0.969867	0.112205	0.115691	-0.0441405
407	P46109	CRKL Crk-like protein	CRKL	K.RVPC*AYDK.T	1.28	1.08	0.98	1.05785	0.947368	0.907407	3	0.970876	0.077928	0.0802657	-0.0426415
627	P49327	FASN Fatty acid synthase	FASN	K.AFDTAGNGYC*R.S	1.38	0.84	1.12	1.1405	0.736842	1.03704	3	0.971458	0.209665	0.215825	-0.041776
52	P06730	EIF4E Eukaryotic translation initiation factor 4E	EIF4E	K.IAIWTTEC*ENR.E	1.11	1.56	0.68	0.917355	1.36842	0.62963	3	0.971802	0.372393	0.383198	-0.0412657
536	Q96HE7	ERO1A ERO1-like protein alpha	ERO1A	K.HDDSSDNFC*EADDIQSPEAEYVDLLLNPER.Y	1.22	1.06	1.06	1.00826	0.929825	0.981481	3	0.97319	0.0398718	0.0409702	-0.0392063
538	Q01813	PFKP ATP-dependent 6-phosphofructokinase, platelet type	PFKP	K.GVFDC*R.K	1.21	1.07	1.06	1	0.938596	0.981481	3	0.973359	0.0314972	0.0323593	-0.0389556
529	P46060	RANGAP1 Ran GTPase-activating protein 1	RANGAP1	K.LDLNGNTLGEEGC*EQLQEVLEGFNMAK.V	1.18		1.05	0.975207		0.972222	2	0.973714	0.00211028	0.00216725	-0.0384294
297	Q96EB1	ELP4 Elongator complex protein 4	ELP4	K.ISSTLKVEPC*SLTPGYTK.L		1.26	0.91		1.10526	0.842593	2	0.973928	0.185736	0.190708	-0.0381132
362	Q15021	NCAPD2 Condensin complex subunit 1	NCAPD2	R.EIGQKC*PQELSR.D	1.3	1.11	0.95	1.07438	0.973684	0.87963	3	0.975898	0.0973941	0.0997995	-0.0351977
506	Q9Y266	NUDC Nuclear migration protein nudC	NUDC	R.WTQTLSELDLAVPFC*VNFR.L	1.03	1.27	1.04	0.85124	1.11404	0.962963	3	0.976079	0.131888	0.13512	-0.0349298
623	Q00839	HNRNPU Heterogeneous nuclear ribonucleoprotein U	HNRNPU	K.AVVVC*PK.D	1.07	1.16	1.11	0.884298	1.01754	1.02778	3	0.97654	0.0800478	0.0819709	-0.0342494
517	P52597	HNRNPF Heterogeneous nuclear ribonucleoprotein F	HNRNPF	R.DLSYC*LSGMYDHR.Y	1.29	1.03	1.05	1.06612	0.903509	0.972222	3	0.980616	0.0816278	0.0832413	-0.0282404
808	P0C5J1	FAM86B2 Putative protein N-methyltransferase FAM86B2	FAM86B2	R.NPETC*QLFTTELGR.D	1.29	0.83	1.24	1.06612	0.72807	1.14815	3	0.980778	0.222662	0.227026	-0.0280015
680	O75914	PAK3 Serine/threonine-protein kinase PAK 3	PAK3	K.LTDFGFC*AQITPEQSKR.S	0.99	1.21	1.15	0.818182	1.0614	1.06481	3	0.981467	0.141419	0.14409	-0.0269888
519	P42575	CASP2 Caspase-2	CASP2	K.MFFIQAC*R.G		1.13	1.05		0.991228	0.972222	2	0.981725	0.0134392	0.0136893	-0.0266089
243	P13010	XRCC5 X-ray repair cross-complementing protein 5	XRCC5	K.C*FSVLGFCK.S		1.32	0.87		1.15789	0.805556	2	0.981725	0.249141	0.253779	-0.0266089
1230	P17676	CEBPB CCAAT/enhancer-binding protein beta	CEBPB	K.APPTAC*YAGAAPAPSQVK.S	1.23	1.08		1.01653	0.947368		2	0.981949	0.0489039	0.0498029	-0.0262805
[truncated: 573 more rows]
