# Supplementary material for: Monitoring GAPDH activity and inhibition with cysteine-reactive chemical probes
Source: Royal Society of Chemistry journal article supplement (doi:10.1039/d2cb00091a), 2022-01-01
Supplement: d2cb00091a4.xlsx [file d2cb00091a4.xlsx]

## Sheet: Hela 10uM KA
index	ipi	description	symbol	sequence	mr.set_1	mr.set_2	mr.set_3	Corrected mr.set_1	Corrected mr.set_2	Corrected mr.set_3	Count	Average	St. Dev	St. Dev/Average	Average Ratio (log2)
3	P61006	RAB8A Ras-related protein Rab-8A	RAB8A	K.C*DVNDKR.Q		0.28	0.3		0.271845	0.283019	2	0.277432	0.00790136	0.0284804	-1.8498
10	O75822	EIF3J Eukaryotic translation initiation factor 3 subunit	EIF3J	K.ITNSLTVLC*SEK.Q		0.4	0.41		0.38835	0.386792	2	0.387571	0.00110101	0.00284079	-1.36747
8	O00160	MYO1F Unconventional myosin-If	MYO1F	R.C*IKPNETK.R		0.48	0.39		0.466019	0.367925	2	0.416972	0.0693636	0.166351	-1.26198
20	P13804	ETFA Electron transfer flavoprotein subunit alpha, mito	ETFA	K.C*DKVAQDLCK.V		0.39	0.5		0.378641	0.471698	2	0.425169	0.0658015	0.154765	-1.23389
17	P10809	HSPD1 60 kDa heat shock protein, mitochondrial	HSPD1	K.C*EFQDAYVLLSEK.K	0.54	0.43	0.48	0.509434	0.417476	0.45283	3	0.459913	0.0463865	0.100859	-1.12057
36	P13804	ETFA Electron transfer flavoprotein subunit alpha, mito	ETFA	R.LGGEVSC*LVAGTK.C		0.42	0.55		0.407767	0.518868	2	0.463317	0.0785602	0.16956	-1.10993
11	Q9NX63	CHCHD3 MICOS complex subunit MIC19	CHCHD3	K.RYESHPVC*ADLQAK.I		0.53	0.44		0.514563	0.415094	2	0.464829	0.070335	0.151314	-1.10523
21	Q9UL25	RAB21 Ras-related protein Rab-21	RAB21	K.VVLLGEGC*VGK.T		0.49	0.5		0.475728	0.471698	2	0.473713	0.00284967	0.0060156	-1.07791
45	P62191	PSMC1 26S proteasome regulatory subunit 4	PSMC1	K.AIC*TEAGLMALR.E		0.45	0.57		0.436893	0.537736	2	0.487315	0.0713065	0.146325	-1.03707
37	P10809	HSPD1 60 kDa heat shock protein, mitochondrial	HSPD1	R.C*IPALDSLTPANEDQK.I		0.47	0.55		0.456311	0.518868	2	0.487589	0.0442347	0.0907211	-1.03626
22	Q9HBH0	RHOF Rho-related GTP-binding protein RhoF	RHOF	R.AAQLEPITYMQGLSAC*EQIR.A		0.53	0.5		0.514563	0.471698	2	0.493131	0.0303101	0.0614647	-1.01996
16	Q9NU22	MDN1 Midasin	MDN1	R.FAASNPC*GNIQR.S		0.56	0.47		0.543689	0.443396	2	0.493543	0.0709179	0.143692	-1.01875
35	P08134	RHOC Rho-related GTP-binding protein RhoC	RHOC	K.KLVIVGDGAC*GK.T		0.5	0.54		0.485437	0.509434	2	0.497435	0.0169685	0.0341119	-1.00742
28	P04181	OAT Ornithine aminotransferase, mitochondrial	OAT	K.VLPMNTGVEAGETAC*K.L		0.52	0.52		0.504854	0.490566	2	0.49771	0.0101034	0.0202997	-1.00662
25	O00567	NOP56 Nucleolar protein 56	NOP56	R.IDC*FSEVPTSVFGEK.L		0.56	0.51		0.543689	0.481132	2	0.512411	0.0442347	0.0863266	-0.964627
24	Q04695	KRT17 Keratin, type I cytoskeletal 17	KRT17	R.LSGGLGAGSC*R.L	0.57	0.54	0.51	0.537736	0.524272	0.481132	3	0.51438	0.02957	0.0574867	-0.959094
136	Q92973	TNPO1 Transportin-1	TNPO1	K.SEC*LNNIGDSSPLIR.A	0.34	0.61	0.69	0.320755	0.592233	0.650943	3	0.52131	0.17615	0.337898	-0.939786
38	O00567	NOP56 Nucleolar protein 56	NOP56	K.IINDNATYC*R.L		0.53	0.56		0.514563	0.528302	2	0.521432	0.00971478	0.018631	-0.939448
39	Q04695	KRT17 Keratin, type I cytoskeletal 17	KRT17	R.LGSAGGLGSTLGGSSYSSC*YSFGSGGGYGSSFGGVDGLLAGGEK.A	0.54	0.57	0.56	0.509434	0.553398	0.528302	3	0.530378	0.0220555	0.0415844	-0.914907
57	Q12931	TRAP1 Heat shock protein 75 kDa, mitochondrial	TRAP1	K.SDC*KEFSSEAR.V		0.52	0.6		0.504854	0.566038	2	0.535446	0.0432632	0.0807984	-0.901187
29	O00567	NOP56 Nucleolar protein 56	NOP56	R.LVAFC*PFASSQVALENANAVSEGVVHEDLR.L	0.64	0.53	0.52	0.603774	0.514563	0.490566	3	0.536301	0.0596522	0.111229	-0.898885
30	Q9Y2R4	DDX52 Probable ATP-dependent RNA helicase DDX52	DDX52	R.SVANVIQQAGC*PVPEYIK.G		0.6	0.52		0.582524	0.490566	2	0.536545	0.0650243	0.121191	-0.898229
67	Q04695	KRT17 Keratin, type I cytoskeletal 17	KRT17	R.C*EMEQQNQEYK.I	0.52	0.58	0.62	0.490566	0.563107	0.584906	3	0.546193	0.0493918	0.0904293	-0.872518
111	P60709	ACTB Actin, cytoplasmic 1	ACTB	K.EKLC*YVALDFEQEMATAASSSSLEK.S	0.47	0.59	0.67	0.443396	0.572816	0.632075	3	0.549429	0.0964892	0.175617	-0.863995
183	P60604	UBE2G2 Ubiquitin-conjugating enzyme E2 G2	UBE2G2	R.VC*ISILHAPGDDPMGYESSAER.W		0.43	0.73		0.417476	0.688679	2	0.553077	0.19177	0.346732	-0.854446
72	P60709	ACTB Actin, cytoplasmic 1	ACTB	K.C*DVDIR.K		0.54	0.63		0.524272	0.59434	2	0.559306	0.0495454	0.0885838	-0.838291
61	P13804	ETFA Electron transfer flavoprotein subunit alpha, mito	ETFA	R.TIYAGNALC*TVK.C		0.56	0.61		0.543689	0.575472	2	0.559581	0.0224735	0.0401614	-0.837582
108	Q9H936	SLC25A22 Mitochondrial glutamate carrier 1	SLC25A22	R.GVNEDTYSGILDC*AR.K		0.51	0.67		0.495146	0.632075	2	0.563611	0.096824	0.171792	-0.827229
97	Q96AG4	LRRC59 Leucine-rich repeat-containing protein 59	LRRC59	K.ATILDLSC*NK.L		0.52	0.66		0.504854	0.622642	2	0.563748	0.0832881	0.14774	-0.826878
66	Q96SK2	TMEM209 Transmembrane protein 209	TMEM209	R.SQAPC*ANKDEADLSSK.Q		0.57	0.62		0.553398	0.584906	2	0.569152	0.0222792	0.0391446	-0.813114
40	O00483	NDUFA4 Cytochrome c oxidase subunit NDUFA4	NDUFA4	R.LALFNPDVC*WDR.N		0.63	0.56		0.61165	0.528302	2	0.569976	0.0589364	0.103401	-0.811026
41	P21980	TGM2 Protein-glutamine gamma-glutamyltransferase 2	TGM2	K.SEGTYC*CGPVPVR.A		0.63	0.56		0.61165	0.528302	2	0.569976	0.0589364	0.103401	-0.811026
135	P11388	TOP2A DNA topoisomerase 2-alpha	TOP2A	K.SFGSTC*QLSEK.F		0.51	0.69		0.495146	0.650943	2	0.573045	0.110166	0.192246	-0.803281
89	Q92797	SYMPK Symplekin	SYMPK	K.ATNLC*FAER.N		0.55	0.65		0.533981	0.613208	2	0.573594	0.0560219	0.0976682	-0.801898
1523	O60841	EIF5B Eukaryotic translation initiation factor 5B	EIF5B	K.KGQEVC*VK.I	0.8	0.41		0.754717	0.398058		2	0.576388	0.252196	0.437545	-0.794889
109	P40937	RFC5 Replication factor C subunit 5	RFC5	K.TSTILAC*AK.Q		0.54	0.67		0.524272	0.632075	2	0.578174	0.0762287	0.131844	-0.790425
58	P78316	NOP14 Nucleolar protein 14	NOP14	K.C*NHPSLAEGNK.A		0.61	0.6		0.592233	0.566038	2	0.579135	0.0185229	0.0319836	-0.788027
184	Q86VU5	COMTD1 Catechol O-methyltransferase domain-containing pro	COMTD1	R.LLTLEQPQGDSMMTC*EQAQLLANLAR.L		0.49	0.73		0.475728	0.688679	2	0.582204	0.150579	0.258637	-0.780404
168	Q9Y2X3	NOP58 Nucleolar protein 58	NOP58	K.IISDNLTYC*K.C		0.5	0.72		0.485437	0.679245	2	0.582341	0.137043	0.235332	-0.780064
98	O00567	NOP56 Nucleolar protein 56	NOP56	R.YLANKC*SIASR.I		0.56	0.66		0.543689	0.622642	2	0.583165	0.0558276	0.0957321	-0.778023
59	P12235	SLC25A4 ADP/ATP translocase 1	SLC25A4	R.YFAGNLASGGAAGATSLC*FVYPLDFAR.T	0.56	0.68	0.6	0.528302	0.660194	0.566038	3	0.584845	0.0679277	0.116147	-0.773875
121	Q5JTH9	RRP12 RRP12-like protein	RRP12	K.GC*QAEADRAEVSR.F		0.55	0.68		0.533981	0.641509	2	0.587745	0.0760344	0.129366	-0.766738
110	Q53HL2	CDCA8 Borealin	CDCA8	R.LAQIC*SSIR.T		0.56	0.67		0.543689	0.632075	2	0.587882	0.0624984	0.106311	-0.766401
42	P30876	POLR2B DNA-directed RNA polymerase II subunit RPB2	POLR2B	R.DC*QIAHGAAQFLR.E		0.67	0.56		0.650485	0.528302	2	0.589394	0.0863968	0.146586	-0.762697
82	P04406	GAPDH Glyceraldehyde-3-phosphate dehydrogenase	GAPDH	R.VPTANVSVVDLTC*R.L	0.49	0.75	0.64	0.462264	0.728155	0.603774	3	0.598064	0.133038	0.222447	-0.741627
73	Q9UBB4	ATXN10 Ataxin-10	ATXN10	R.NAC*IECSVNQNSIR.N		0.62	0.63		0.601942	0.59434	2	0.598141	0.00537551	0.00898704	-0.741443
1	O95602	POLR1A DNA-directed RNA polymerase I subunit RPA1	POLR1A	R.SPSAC*LVVGK.V	1.15		0.12	1.08491		0.113208	2	0.599057	0.687094	1.14696	-0.739236
308	P62913	RPL11 60S ribosomal protein L11	RPL11	K.LC*LNICVGESGDR.L		0.44	0.82		0.427184	0.773585	2	0.600385	0.244942	0.407975	-0.736041
155	P23919	DTYMK Thymidylate kinase	DTYMK	K.LVEALC*AAGHR.A		0.55	0.71		0.533981	0.669811	2	0.601896	0.0960468	0.159574	-0.732414
122	Q9Y2Q3	GSTK1 Glutathione S-transferase kappa 1	GSTK1	K.NQLKETTEAAC*R.Y		0.58	0.68		0.563107	0.641509	2	0.602308	0.055439	0.0920443	-0.731426
54	O43159	RRP8 Ribosomal RNA-processing protein 8	RRP8	K.AQLSGLQLQPC*LYK.R		0.67	0.59		0.650485	0.556604	2	0.603545	0.0663844	0.109991	-0.728468
26	Q9BVP2	GNL3 Guanine nucleotide-binding protein-like 3	GNL3	K.SSIINSLKQEQMC*NVGVSMGLTR.S		0.76	0.51		0.737864	0.481132	2	0.609498	0.181537	0.297847	-0.714306
90	Q5JTH9	RRP12 RRP12-like protein	RRP12	K.GHSSDSNPAIC*R.H		0.63	0.65		0.61165	0.613208	2	0.612429	0.00110101	0.00179777	-0.707385
247	Q00325	SLC25A3 Phosphate carrier protein, mitochondrial	SLC25A3	K.FAC*FER.T	0.51	0.64	0.78	0.481132	0.621359	0.735849	3	0.61278	0.127575	0.208191	-0.706559
211	P05141	SLC25A5 ADP/ATP translocase 2	SLC25A5	R.EFRGLGDC*LVK.I	0.52	0.66	0.75	0.490566	0.640777	0.707547	3	0.612963	0.111132	0.181303	-0.706127
46	Q63HN8	RNF213 E3 ubiquitin-protein ligase RNF213	RNF213	R.ASVGC*GSEAAR.Y		0.71	0.57		0.68932	0.537736	2	0.613528	0.107186	0.174705	-0.704799
156	O00410	IPO5 Importin-5	IPO5	R.VAAAESMPLLLEC*AR.V		0.58	0.71		0.563107	0.669811	2	0.616459	0.0754515	0.122395	-0.697923
412	P31943	HNRNPH1 Heterogeneous nuclear ribonucleoprotein H	HNRNPH1	R.GLPFGC*SK.E	0.44		0.87	0.415094		0.820755	2	0.617925	0.286845	0.464208	-0.694497
277	Q86VU5	COMTD1 Catechol O-methyltransferase domain-containing pro	COMTD1	K.VLQPPKGDVAAEC*VR.N		0.5	0.8		0.485437	0.754717	2	0.620077	0.19041	0.307074	-0.689481
145	P58107	EPPK1 Epiplakin	EPPK1	R.YLEGTSC*IAGVLVPAKDQPGRQEK.M		0.6	0.7		0.582524	0.660377	2	0.621451	0.0550504	0.0885838	-0.686288
99	Q6NUK1	SLC25A24 Calcium-binding mitochondrial carrier protein SCaM	SLC25A24	K.TGQYSGIYDC*AK.K		0.64	0.66		0.621359	0.622642	2	0.622	0.000906713	0.00145774	-0.685013
91	Q10713	PMPCA Mitochondrial-processing peptidase subunit alpha	PMPCA	K.HGGICDC*QTSR.D		0.65	0.65		0.631068	0.613208	2	0.622138	0.0126292	0.0202997	-0.684694
298	O95782	AP2A1 AP-2 complex subunit alpha-1	AP2A1	K.TVFEALQAPAC*HENMVK.V		0.5	0.81		0.485437	0.764151	2	0.624794	0.197081	0.315433	-0.678548
208	P21796	VDAC1 Voltage-dependent anion-selective channel protein	VDAC1	R.EHINLGC*DMDFDIAGPSIR.G		0.56	0.75		0.543689	0.707547	2	0.625618	0.115865	0.185201	-0.676646
100	P22087	FBL rRNA 2-O-methyltransferase fibrillarin	FBL	K.ANC*IDSTASAEAVFASEVKK.M		0.65	0.66		0.631068	0.622642	2	0.626855	0.0059584	0.00950523	-0.673797
1560	Q15041	ARL6IP1 ADP-ribosylation factor-like protein 6-interacting	ARL6IP1	R.FHEIC*SNLVK.T	0.53	0.78		0.5	0.757282		2	0.628641	0.181926	0.289395	-0.669692
157	Q13823	GNL2 Nucleolar GTP-binding protein 2	GNL2	K.KVC*NVAPIAGETK.V		0.61	0.71		0.592233	0.669811	2	0.631022	0.0548561	0.0869322	-0.664237
123	P05141	SLC25A5 ADP/ATP translocase 2	SLC25A5	K.GTDIMYTGTLDC*WR.K		0.64	0.68		0.621359	0.641509	2	0.631434	0.0142484	0.0225651	-0.663295
81	Q13636	RAB31 Ras-related protein Rab-31	RAB31	K.VC*LLGDTGVGK.S		0.68	0.64		0.660194	0.603774	2	0.631984	0.0398954	0.0631272	-0.66204
96	P14923	JUP Junction plakoglobin	JUP	R.AGDKDDITEPAVC*ALR.H	0.83	0.51	0.66	0.783019	0.495146	0.622642	3	0.633602	0.144249	0.227665	-0.658351
209	P21796	VDAC1 Voltage-dependent anion-selective channel protein	VDAC1	K.YQIDPDAC*FSAK.V		0.58	0.75		0.563107	0.707547	2	0.635327	0.102135	0.160759	-0.654429
60	O75616	ERAL1 GTPase Era, mitochondrial	ERAL1	K.YSQIPSVLVMNKVDC*LK.Q		0.73	0.6		0.708738	0.566038	2	0.637388	0.100904	0.158309	-0.649757
56	P27635	RPL10 60S ribosomal protein L10	RPL10	R.FC*RGVPDAK.I		0.74	0.59		0.718447	0.556604	2	0.637525	0.11444	0.179507	-0.649446
55	Q9Y5M8	SRPRB Signal recognition particle receptor subunit beta	SRPRB	R.AVLLVGLC*DSGK.T		0.74	0.59		0.718447	0.556604	2	0.637525	0.11444	0.179507	-0.649446
355	Q08211	DHX9 ATP-dependent RNA helicase A	DHX9	K.SSVNC*PFSSQDMK.Y		0.49	0.85		0.475728	0.801887	2	0.638807	0.230629	0.361031	-0.646547
356	Q8IXH7	NELFCD Negative elongation factor C/D	NELFCD	R.AC*QALGAMLSK.G		0.5	0.85		0.485437	0.801887	2	0.643662	0.223764	0.347642	-0.635625
137	Q96AG4	LRRC59 Leucine-rich repeat-containing protein 59	LRRC59	K.LTTLPSDFC*GLTHLVK.L		0.67	0.69		0.650485	0.650943	2	0.650714	0.000323826	0.000497647	-0.619904
102	P49419	ALDH7A1 Alpha-aminoadipic semialdehyde dehydrogenase	ALDH7A1	R.STC*TINYSK.D		0.7	0.66		0.679612	0.622642	2	0.651127	0.040284	0.0618681	-0.61899
31	Q9NVS9	PNPO Pyridoxine-5-phosphate oxidase	PNPO	K.LPEEEAEC*YFHSRPK.S		0.84	0.52		0.815534	0.490566	2	0.65305	0.229787	0.351867	-0.614735
185	P60709	ACTB Actin, cytoplasmic 1	ACTB	K.QEYDESGPSIVHRKC*F.-	0.68	0.65	0.73	0.641509	0.631068	0.688679	3	0.653752	0.0306949	0.0469519	-0.613184
200	Q15149	PLEC Plectin	PLEC	R.LC*FEGLR.S		0.63	0.74		0.61165	0.698113	2	0.654882	0.0611384	0.0933579	-0.610693
146	Q15149	PLEC Plectin	PLEC	R.LLEAQAC*TGGIIDPSTGERFPVTDAVNK.G		0.67	0.7		0.650485	0.660377	2	0.655431	0.00699464	0.0106718	-0.609483
63	P32322	PYCR1 Pyrroline-5-carboxylate reductase 1, mitochondrial	PYCR1	R.C*MTNTPVVVR.E		0.76	0.61		0.737864	0.575472	2	0.656668	0.114829	0.174866	-0.606764
1579	Q6UB35	MTHFD1L Monofunctional C1-tetrahydrofolate synthase, mitoc	MTHFD1L	K.IDRYTQQGFGNLPIC*MAK.T	0.53	0.84		0.5	0.815534		2	0.657767	0.223116	0.339203	-0.604351
210	P42704	LRPPRC Leucine-rich PPR motif-containing protein, mitocho	LRPPRC	K.VFNDTC*R.S		0.63	0.75		0.61165	0.707547	2	0.659599	0.0678092	0.102804	-0.600339
124	Q9NX24	NHP2 H/ACA ribonucleoprotein complex subunit 2	NHP2	K.ADPDGPEAQAEAC*SGER.T		0.7	0.68		0.679612	0.641509	2	0.660561	0.0269423	0.0407871	-0.598237
225	O43143	DHX15 Pre-mRNA-splicing factor ATP-dependent RNA helicas	DHX15	R.GVAC*TQPR.R		0.63	0.76		0.61165	0.716981	2	0.664316	0.07448	0.112115	-0.590059
125	Q9H6R4	NOL6 Nucleolar protein 6	NOL6	R.QAVDSPAASFC*R.G		0.71	0.68		0.68932	0.641509	2	0.665415	0.0338075	0.0508066	-0.587674
83	Q7Z7H8	MRPL10 39S ribosomal protein L10, mitochondrial	MRPL10	R.TVPFLPLLGGC*IDDTILSR.Q		0.75	0.64		0.728155	0.603774	2	0.665964	0.0879512	0.132066	-0.586483
32	Q9UJX3	ANAPC7 Anaphase-promoting complex subunit 7	ANAPC7	R.NALANQSDC*VLHR.I		0.86	0.53		0.834951	0.5	2	0.667476	0.236846	0.354839	-0.583213
278	Q99832	CCT7 T-complex protein 1 subunit eta	CCT7	R.YNFFTGC*PK.A		0.61	0.8		0.592233	0.754717	2	0.673475	0.114894	0.170598	-0.570304
201	Q9Y6M0	PRSS21 Testisin	PRSS21	R.KPESQEAAPLSGPC*GR.R		0.67	0.74		0.650485	0.698113	2	0.674299	0.0336779	0.0499451	-0.568539
186	Q07065	CKAP4 Cytoskeleton-associated protein 4	CKAP4	K.SSSSSSASAAAAAAAASSSASC*SR.R		0.68	0.73		0.660194	0.688679	2	0.674437	0.020142	0.0298649	-0.568245
169	O60684	KPNA6 Importin subunit alpha-7	KPNA6	K.VSPC*LPVLSR.L		0.69	0.72		0.669903	0.679245	2	0.674574	0.00660605	0.00979292	-0.567951
147	P51398	DAP3 28S ribosomal protein S29, mitochondrial	DAP3	K.TFSEAC*LMVR.K		0.71	0.7		0.68932	0.660377	2	0.674849	0.0204658	0.0303265	-0.567364
721	P53618	COPB1 Coatomer subunit beta	COPB1	R.C*IYNLLQSSSPAVK.Y		0.38	1.04		0.368932	0.981132	2	0.675032	0.432891	0.641289	-0.566972
112	Q16822	PCK2 Phosphoenolpyruvate carboxykinase [GTP], mitochond	PCK2	R.YVAAAFPSAC*GK.T		0.74	0.67		0.718447	0.632075	2	0.675261	0.0610736	0.0904444	-0.566483
187	P62979	RPS27A Ubiquitin-40S ribosomal protein S27a	RPS27A	K.C*CLTYCFNKPEDK.-	0.7	0.7	0.73	0.660377	0.679612	0.688679	3	0.676223	0.0144521	0.0213718	-0.56443
266	O75746	SLC25A12 Calcium-binding mitochondrial carrier protein Aral	SLC25A12	R.AGQTTYSGVIDC*FR.K		0.63	0.79		0.61165	0.745283	2	0.678467	0.0944925	0.139274	-0.55965
241	P41252	IARS Isoleucine--tRNA ligase, cytoplasmic	IARS	K.MGITEYNNQC*R.A		0.65	0.77		0.631068	0.726415	2	0.678742	0.0674206	0.0993318	-0.559066
115	O75533	SF3B1 Splicing factor 3B subunit 1	SF3B1	R.VAIGPC*R.M		0.75	0.67		0.728155	0.632075	2	0.680115	0.0679387	0.0998929	-0.556149
114	P40939	HADHA Trifunctional enzyme subunit alpha, mitochondrial	HADHA	K.TGIEQGSDAGYLC*ESQK.F		0.75	0.67		0.728155	0.632075	2	0.680115	0.0679387	0.0998929	-0.556149
113	Q9Y5M8	SRPRB Signal recognition particle receptor subunit beta	SRPRB	K.NTPSFLIAC*NK.Q		0.75	0.67		0.728155	0.632075	2	0.680115	0.0679387	0.0998929	-0.556149
256	O15131	KPNA5 Importin subunit alpha-6	KPNA5	R.NAVWALSNLC*R.G	0.54	0.82	0.78	0.509434	0.796117	0.735849	3	0.680467	0.151153	0.222131	-0.555404
456	Q9NPA8	ENY2 Transcription and mRNA export factor ENY2	ENY2	K.LIEC*GWKDQLK.A		0.53	0.9		0.514563	0.849057	2	0.68181	0.236523	0.346904	-0.552559
62	Q9Y6C9	MTCH2 Mitochondrial carrier homolog 2	MTCH2	K.YCGLC*DSIITIYR.E	0.85	0.69	0.61	0.801887	0.669903	0.575472	3	0.68242	0.113725	0.16665	-0.551267
170	P78527	PRKDC DNA-dependent protein kinase catalytic subunit	PRKDC	R.VEQLFQVMNGILAQDSAC*SQR.A		0.71	0.72		0.68932	0.679245	2	0.684283	0.00712418	0.0104112	-0.547335
126	P52948	NUP98 Nuclear pore complex protein Nup98-Nup96	NUP98	R.IEQIQC*YSAK.D		0.75	0.68		0.728155	0.641509	2	0.684832	0.0612679	0.0894641	-0.546177
117	Q9H7Z7	PTGES2 Prostaglandin E synthase 2	PTGES2	K.TC*PFCSK.V		0.76	0.67		0.737864	0.632075	2	0.68497	0.0748038	0.109208	-0.545888
226	Q6P1M0	SLC27A4 Long-chain fatty acid transport protein 4	SLC27A4	R.AGMAAVASPTGNC*DLER.F		0.68	0.76		0.660194	0.716981	2	0.688588	0.0401544	0.0583142	-0.538288
279	P49419	ALDH7A1 Alpha-aminoadipic semialdehyde dehydrogenase	ALDH7A1	K.GSDC*GIVNVNIPTSGAEIGGAFGGEK.H		0.65	0.8		0.631068	0.754717	2	0.692892	0.0874331	0.126186	-0.529297
249	O75694	NUP155 Nuclear pore complex protein Nup155	NUP155	K.ISNQVDLSNVC*AQYR.Q		0.67	0.78		0.650485	0.735849	2	0.693167	0.0603612	0.0870803	-0.528725
202	Q9BVP2	GNL3 Guanine nucleotide-binding protein-like 3	GNL3	K.VIEASDVVLEVLDARDPLGC*R.C		0.71	0.74		0.68932	0.698113	2	0.693717	0.00621746	0.00896254	-0.527581
188	Q8IZL8	PELP1 Proline-, glutamic acid- and leucine-rich protein	PELP1	R.KGDSNANSDVC*AAALR.G		0.72	0.73		0.699029	0.688679	2	0.693854	0.00731847	0.0105476	-0.527296
138	P32322	PYCR1 Pyrroline-5-carboxylate reductase 1, mitochondrial	PYCR1	R.SLLINAVEASC*IR.T	0.8	0.7	0.69	0.754717	0.679612	0.650943	3	0.695091	0.0535905	0.0770985	-0.524727
47	P45880	VDAC2 Voltage-dependent anion-selective channel protein	VDAC2	K.VC*EDLDTSVNLAWTSGTNCTR.F		0.88	0.57		0.854369	0.537736	2	0.696052	0.223893	0.321662	-0.522732
140	O00541	PES1 Pescadillo homolog	PES1	K.AGEGTYALDSESC*MEK.L		0.77	0.69		0.747573	0.650943	2	0.699258	0.0683273	0.097714	-0.516103
368	Q6UX07	DHRS13 Dehydrogenase/reductase SDR family member 13	DHRS13	R.VVVVASAAHC*R.G		0.61	0.86		0.592233	0.811321	2	0.701777	0.154918	0.220752	-0.510916
242	Q96GM5	SMARCD1 SWI/SNF-related matrix-associated actin-dependent	SMARCD1	R.DPQGFINDWLQSQC*R.D		0.7	0.77		0.679612	0.726415	2	0.703013	0.033095	0.047076	-0.508376
227	O60264	SMARCA5 SWI/SNF-related matrix-associated actin-dependent	SMARCA5	K.ATNVC*TR.F		0.71	0.76		0.68932	0.716981	2	0.703151	0.0195591	0.0278164	-0.508094
212	Q15149	PLEC Plectin	PLEC	K.AFC*GFEDPR.T		0.72	0.75		0.699029	0.707547	2	0.703288	0.00602317	0.00856429	-0.507812
172	O95478	NSA2 Ribosome biogenesis protein NSA2 homolog	NSA2	K.VC*FVGDGFTR.K		0.75	0.72		0.728155	0.679245	2	0.7037	0.0345846	0.0491468	-0.506967
127	P49411	TUFM Elongation factor Tu, mitochondrial	TUFM	K.NMITGTAPLDGC*ILVVAANDGPMPQTR.E		0.79	0.68		0.76699	0.641509	2	0.70425	0.0887284	0.12599	-0.505841
176	O94906	PRPF6 Pre-mRNA-processing factor 6	PRPF6	R.HGELWC*AVSK.D	0.69	0.81	0.72	0.650943	0.786408	0.679245	3	0.705532	0.0714556	0.101279	-0.503216
440	Q99439	CNN2 Calponin-2	CNN2	K.GLKDGTILC*TLMNK.L		0.59	0.89		0.572816	0.839623	2	0.706219	0.188661	0.267142	-0.501812
310	Q03405	PLAUR Urokinase plasminogen activator surface receptor	PLAUR	K.C*NEGPILELENLPQNGR.Q		0.66	0.82		0.640777	0.773585	2	0.707181	0.0939096	0.132794	-0.499849
250	Q9NSE4	IARS2 Isoleucine--tRNA ligase, mitochondrial	IARS2	K.C*GFSELYSWQR.E		0.7	0.78		0.679612	0.735849	2	0.70773	0.0397659	0.0561879	-0.498728
603	Q14152	EIF3A Eukaryotic translation initiation factor 3 subunit	EIF3A	R.HC*DLQVR.I	0.78	0.48	0.98	0.735849	0.466019	0.924528	3	0.708799	0.230448	0.325125	-0.496552
602	Q9NVX2	NLE1 Notchless protein homolog 1	NLE1	R.AHDGVLC*R.T	0.78	0.48	0.98	0.735849	0.466019	0.924528	3	0.708799	0.230448	0.325125	-0.496552
148	P55084	HADHB Trifunctional enzyme subunit beta, mitochondrial	HADHB	K.EGGQYGLVAAC*AAGGQGHAMIVEAYPK.-		0.78	0.7		0.757282	0.660377	2	0.708829	0.0685216	0.0966687	-0.49649
311	O95292	VAPB Vesicle-associated membrane protein-associated pro	VAPB	K.VMEEC*KR.L		0.67	0.82		0.650485	0.773585	2	0.712035	0.0870445	0.122247	-0.48998
251	P22695	UQCRC2 Cytochrome b-c1 complex subunit 2, mitochondrial	UQCRC2	R.NALANPLYC*PDYR.I		0.71	0.78		0.68932	0.735849	2	0.712585	0.0329007	0.046171	-0.488867
203	Q9Y5J1	UTP18 U3 small nucleolar RNA-associated protein 18 homol	UTP18	R.NGQYVACGSNC*GVVNIYNQDSCLQETNPKPIK.A		0.75	0.74		0.728155	0.698113	2	0.713134	0.021243	0.0297882	-0.487754
248	O43175	PHGDH D-3-phosphoglycerate dehydrogenase	PHGDH	K.VLISDSLDPC*CR.K	0.83	0.64	0.78	0.783019	0.621359	0.735849	3	0.713409	0.0831332	0.116529	-0.487199
149	Q92841	DDX17 Probable ATP-dependent RNA helicase DDX17	DDX17	R.GDGPIC*LVLAPTR.E		0.79	0.7		0.76699	0.660377	2	0.713684	0.0753867	0.10563	-0.486643
171	P78527	PRKDC DNA-dependent protein kinase catalytic subunit	PRKDC	R.APPC*EYKDWLTK.M	0.81	0.72	0.72	0.764151	0.699029	0.679245	3	0.714142	0.0444245	0.0622068	-0.485718
252	P42695	NCAPD3 Condensin-2 complex subunit D3	NCAPD3	R.APLAVTSQVINC*R.N		0.72	0.78		0.699029	0.735849	2	0.717439	0.0260356	0.0362897	-0.479072
174	P49411	TUFM Elongation factor Tu, mitochondrial	TUFM	K.GDEC*ELLGHSK.N	0.75	0.79	0.72	0.707547	0.76699	0.679245	3	0.717928	0.0447841	0.0623796	-0.47809
204	Q9Y4P3	TBL2 Transducin beta-like protein 2	TBL2	K.TGRFEEAAGAAPC*R.L		0.76	0.74		0.737864	0.698113	2	0.717989	0.0281081	0.0391484	-0.477967
128	P41134	ID1 DNA-binding protein inhibitor ID-1	ID1	K.VASGSTATAAAGPSC*ALK.A		0.82	0.68		0.796117	0.641509	2	0.718813	0.109324	0.152089	-0.476312
104	Q9NZJ7	MTCH1 Mitochondrial carrier homolog 1	MTCH1	R.RVSSGSC*FALE.-		0.84	0.66		0.815534	0.622642	2	0.719088	0.136396	0.189679	-0.47576
93	Q9BVV7	TIMM21 Mitochondrial import inner membrane translocase su	TIMM21	K.DGLKHTC*VK.F		0.85	0.65		0.825243	0.613208	2	0.719225	0.149932	0.208463	-0.475485
635	P08729	KRT7 Keratin, type II cytoskeletal 7	KRT7	K.AQYEEMAKC*SR.A		0.51	1		0.495146	0.943396	2	0.719271	0.316961	0.44067	-0.475393
84	O15091	KIAA0391 Mitochondrial ribonuclease P protein 3	KIAA0391	R.DHKAC*LPDAK.T		0.86	0.64		0.834951	0.603774	2	0.719363	0.163467	0.227239	-0.475209
85	Q9BVP2	GNL3 Guanine nucleotide-binding protein-like 3	GNL3	K.NAAPFRSEVC*FGK.E		0.86	0.64		0.834951	0.603774	2	0.719363	0.163467	0.227239	-0.475209
68	Q9NVN8	GNL3L Guanine nucleotide-binding protein-like 3-like pro	GNL3L	R.C*SVPVDQASESLLK.S		0.88	0.62		0.854369	0.584906	2	0.719637	0.190539	0.264771	-0.474658
312	P35998	PSMC2 26S proteasome regulatory subunit 7	PSMC2	K.IDPTVTMMQVEEKPDVTYSDVGGC*K.E		0.69	0.82		0.669903	0.773585	2	0.721744	0.0733142	0.101579	-0.470441
175	P31327	CPS1 Carbamoyl-phosphate synthase [ammonia], mitochondr	CPS1	K.VVAVDC*GIK.N		0.79	0.72		0.76699	0.679245	2	0.723118	0.0620451	0.0858022	-0.467697
282	P11388	TOP2A DNA topoisomerase 2-alpha	TOP2A	K.LC*NIFSTK.F		0.72	0.8		0.699029	0.754717	2	0.726873	0.0393773	0.0541735	-0.460225
228	P62979	RPS27A Ubiquitin-40S ribosomal protein S27a	RPS27A	R.ECPSDEC*GAGVFMASHFDR.H		0.76	0.76		0.737864	0.716981	2	0.727423	0.0147665	0.0202997	-0.459134
191	Q1KMD3	HNRNPUL2 Heterogeneous nuclear ribonucleoprotein U-like pro	HNRNPUL2	R.NFILDQC*NVYNSGQR.R		0.79	0.73		0.76699	0.688679	2	0.727835	0.0553743	0.0760808	-0.458317
779	Q7L2J0	MEPCE 7SK snRNA methylphosphate capping enzyme	MEPCE	R.KFQYGNYC*K.Y		0.46	1.07		0.446602	1.00943	2	0.728018	0.397982	0.546666	-0.457954
158	Q6NXR4	TTI2 TELO2-interacting protein 2	TTI2	K.IPQSC*EDR.K		0.81	0.71		0.786408	0.669811	2	0.72811	0.0824461	0.113233	-0.457773
92	P10809	HSPD1 60 kDa heat shock protein, mitochondrial	HSPD1	R.AAVEEGIVLGGGC*ALLR.C	0.94	0.71	0.65	0.886792	0.68932	0.613208	3	0.729773	0.141207	0.193495	-0.454479
343	Q92797	SYMPK Symplekin	SYMPK	K.AVAC*SGAAQVR.I	0.63	0.83	0.84	0.59434	0.805825	0.792453	3	0.730873	0.11843	0.162039	-0.452308
339	P56381	ATP5E ATP synthase subunit epsilon, mitochondrial	ATP5E	R.YSQIC*AK.A		0.69	0.84		0.669903	0.792453	2	0.731178	0.0866559	0.118515	-0.451706
177	P78527	PRKDC DNA-dependent protein kinase catalytic subunit	PRKDC	K.C*LMDQATDPNILGR.T		0.81	0.72		0.786408	0.679245	2	0.732827	0.0757753	0.103401	-0.448456
159	P50454	SERPINH1 Serpin H1	SERPINH1	K.QHYNC*EHSK.I		0.82	0.71		0.796117	0.669811	2	0.732964	0.0893113	0.121849	-0.448186
103	Q15020	SART3 Squamous cell carcinoma antigen recognized by T-ce	SART3	R.AHGDTQHC*R.K	0.88	0.77	0.66	0.830189	0.747573	0.622642	3	0.733468	0.10449	0.14246	-0.447195
369	Q7L2E3	DHX30 Putative ATP-dependent RNA helicase DHX30	DHX30	R.C*NVIITQPR.R	0.82	0.64	0.86	0.773585	0.621359	0.811321	3	0.735422	0.100567	0.136747	-0.443356
139	Q1KMD3	HNRNPUL2 Heterogeneous nuclear ribonucleoprotein U-like pro	HNRNPUL2	K.SRDLLVQQASQC*LSK.L	0.91	0.72	0.69	0.858491	0.699029	0.650943	3	0.736154	0.10864	0.147578	-0.44192
299	Q9UH62	ARMCX3 Armadillo repeat-containing X-linked protein 3	ARMCX3	K.MAEGGSGDVDDAGDC*SGAR.Y		0.73	0.81		0.708738	0.764151	2	0.736444	0.039183	0.0532056	-0.441351
229	P27635	RPL10 60S ribosomal protein L10	RPL10	K.RLIPDGC*GVK.Y	0.78	0.78	0.76	0.735849	0.757282	0.716981	3	0.736704	0.0201638	0.0273703	-0.440843
253	Q14152	EIF3A Eukaryotic translation initiation factor 3 subunit	EIF3A	R.KLC*DNLR.M		0.76	0.78		0.737864	0.735849	2	0.736857	0.00142484	0.00193367	-0.440544
214	Q96TA1	FAM129B Niban-like protein 1	FAM129B	R.HC*NNGIPEDSKVEGPAFTDAIR.M		0.79	0.75		0.76699	0.707547	2	0.737269	0.0420326	0.0570113	-0.439738
13	Q9Y6C9	MTCH2 Mitochondrial carrier homolog 2	MTCH2	K.TYC*CDLK.M	1.09	0.79	0.45	1.0283	0.76699	0.424528	3	0.73994	0.302794	0.409215	-0.434519
357	P63010	AP2B1 AP-2 complex subunit beta	AP2B1	R.C*AIKVEQSAER.C		0.7	0.85		0.679612	0.801887	2	0.740749	0.0864616	0.116722	-0.432943
313	P45880	VDAC2 Voltage-dependent anion-selective channel protein	VDAC2	K.SC*SGVEFSTSGSSNTDTGK.V		0.73	0.82		0.708738	0.773585	2	0.741161	0.0458538	0.0618675	-0.43214
309	P62333	PSMC6 26S proteasome regulatory subunit 10B	PSMC6	R.DHQPC*IIFMDEIDAIGGR.R	0.9	0.62	0.82	0.849057	0.601942	0.773585	3	0.741528	0.126638	0.17078	-0.431427
254	Q92973	TNPO1 Transportin-1	TNPO1	R.SITC*WTLSR.Y		0.77	0.78		0.747573	0.735849	2	0.741711	0.00828995	0.0111768	-0.431071
243	Q9BVP2	GNL3 Guanine nucleotide-binding protein-like 3	GNL3	K.LLGGFQETC*SK.A		0.78	0.77		0.757282	0.726415	2	0.741848	0.0218259	0.029421	-0.430804
150	Q9Y399	MRPS2 28S ribosomal protein S2, mitochondrial	MRPS2	R.DC*GEYAHTR.Y		0.85	0.7		0.825243	0.660377	2	0.74281	0.116577	0.156941	-0.428935
441	Q15050	RRS1 Ribosome biogenesis regulatory protein homolog	RRS1	R.C*AGPTPEAELQALAR.D		0.67	0.89		0.650485	0.839623	2	0.745054	0.13374	0.179504	-0.424583
370	O43264	ZW10 Centromere/kinetochore protein zw10 homolog	ZW10	R.LAPILC*DGTATFVDLVPGFR.R		0.7	0.86		0.679612	0.811321	2	0.745466	0.0931324	0.124932	-0.423785
340	Q9UGP8	SEC63 Translocation protein SEC63 homolog	SEC63	K.KNEPPLTC*PYSLK.A		0.72	0.84		0.699029	0.792453	2	0.745741	0.0660605	0.0885838	-0.423253
267	O94906	PRPF6 Pre-mRNA-processing factor 6	PRPF6	R.AVAHC*PK.A		0.77	0.79		0.747573	0.745283	2	0.746428	0.00161913	0.00216917	-0.421925
52	Q8N556	AFAP1 Actin filament-associated protein 1	AFAP1	K.KSQAAPGSSPC*R.G		0.98	0.58		0.951456	0.54717	2	0.749313	0.285874	0.381514	-0.416359
51	Q9UQ80	PA2G4 Proliferation-associated protein 2G4	PA2G4	R.MGVVEC*AK.H		0.98	0.58		0.951456	0.54717	2	0.749313	0.285874	0.381514	-0.416359
524	P07814	EPRS Bifunctional glutamate/proline--tRNA ligase	EPRS	K.IDMSSNNGC*MRDPTLYR.C		0.64	0.93		0.621359	0.877358	2	0.749359	0.181019	0.241565	-0.416271
317	Q9UBB4	ATXN10 Ataxin-10	ATXN10	R.NAC*IEC*SVNQNSIR.N	0.77		0.82	0.726415		0.773585	2	0.75	0.0333541	0.0444721	-0.415037
391	P51114	FXR1 Fragile X mental retardation syndrome-related prot	FXR1	R.NEEATKHLEC*TK.Q	0.73		0.86	0.688679		0.811321	2	0.75	0.0867206	0.115628	-0.415037
371	P48047	ATP5O ATP synthase subunit O, mitochondrial	ATP5O	R.GEVPC*TVTSASPLEEATLSELK.T		0.71	0.86		0.68932	0.811321	2	0.750321	0.0862673	0.114974	-0.414421
233	P10909	CLU Clusterin	CLU	R.EILSVDC*STNNPSQAK.L		0.81	0.76		0.786408	0.716981	2	0.751694	0.049092	0.0653085	-0.411782
192	Q14683	SMC1A Structural maintenance of chromosomes protein 1A	SMC1A	R.NSSAQAFLGPENPEEPYLDGINYNC*VAPGKR.F		0.84	0.73		0.815534	0.688679	2	0.752107	0.0896998	0.119265	-0.410991
173	P27635	RPL10 60S ribosomal protein L10	RPL10	K.MLSC*AGADR.L	0.88	0.77	0.72	0.830189	0.747573	0.679245	3	0.752336	0.0755843	0.100466	-0.410552
394	Q00610	CLTC Clathrin heavy chain 1	CLTC	R.LAELEEFINGPNNAHIQQVGDRC*YDEK.M		0.71	0.87		0.68932	0.820755	2	0.755038	0.0929381	0.123091	-0.40538
231	P27635	RPL10 60S ribosomal protein L10	RPL10	R.IC*ANKYMVK.S	0.82	0.8	0.76	0.773585	0.776699	0.716981	3	0.755755	0.0336153	0.044479	-0.404009
268	P35914	HMGCL Hydroxymethylglutaryl-CoA lyase, mitochondrial	HMGCL	K.VAQATC*KL.-		0.79	0.79		0.76699	0.745283	2	0.756137	0.0153494	0.0202997	-0.403281
255	Q9NZ45	CISD1 CDGSH iron-sulfur domain-containing protein 1	CISD1	K.IVHAFDMEDLGDKAVYC*R.C		0.8	0.78		0.776699	0.735849	2	0.756274	0.0288853	0.0381942	-0.403019
205	Q13423	NNT NAD(P) transhydrogenase, mitochondrial	NNT	R.EANSIIITPGYGLC*AAK.A		0.84	0.74		0.815534	0.698113	2	0.756824	0.083029	0.109707	-0.401971
280	Q9Y3E5	PTRH2 Peptidyl-tRNA hydrolase 2, mitochondrial	PTRH2	R.VC*FGMLPK.S	0.89	0.7	0.8	0.839623	0.679612	0.754717	3	0.757984	0.0800555	0.105616	-0.399761
358	Q13155	AIMP2 Aminoacyl tRNA synthase complex-interacting multif	AIMP2	R.SC*ENLAPFNTALK.L	0.8	0.74	0.85	0.754717	0.718447	0.801887	3	0.75835	0.0418386	0.0551705	-0.399064
189	P04843	RPN1 Dolichyl-diphosphooligosaccharide--protein glycosy	RPN1	K.VAC*ITEQVLTLVNK.R	0.92	0.74	0.73	0.867925	0.718447	0.688679	3	0.75835	0.0960543	0.126662	-0.399064
322	Q00839	HNRNPU Heterogeneous nuclear ribonucleoprotein U	HNRNPU	K.GKVC*FEMK.V	0.77	0.79	0.83	0.726415	0.76699	0.783019	3	0.758808	0.0291755	0.0384491	-0.398193
373	P05388	RPLP0 60S acidic ribosomal protein P0	RPLP0	K.C*FIVGADNVGSK.Q	0.73	0.8	0.86	0.688679	0.776699	0.811321	3	0.7589	0.0632285	0.0833161	-0.398019
374	Q14152	EIF3A Eukaryotic translation initiation factor 3 subunit	EIF3A	K.NIC*QQVNIK.S	0.73	0.8	0.86	0.688679	0.776699	0.811321	3	0.7589	0.0632285	0.0833161	-0.398019
244	P78527	PRKDC DNA-dependent protein kinase catalytic subunit	PRKDC	R.SQGC*SEQVLTVLK.T		0.82	0.77		0.796117	0.726415	2	0.761266	0.0492863	0.0647426	-0.393528
234	Q9BQG0	MYBBP1A Myb-binding protein 1A	MYBBP1A	K.GNTAEGC*VHETQEK.Q		0.83	0.76		0.805825	0.716981	2	0.761403	0.0628223	0.0825086	-0.393267
314	P27635	RPL10 60S ribosomal protein L10	RPL10	K.AKVDEFPLC*GHMVSDEYEQLSSEALEAAR.I	0.83	0.75	0.82	0.783019	0.728155	0.773585	3	0.761586	0.0293339	0.0385168	-0.39292
232	P62829	RPL23 60S ribosomal protein L23	RPL23	K.EC*ADLWPR.I	0.84	0.8	0.76	0.792453	0.776699	0.716981	3	0.762044	0.0398129	0.0522448	-0.392053
722	P38117	ETFB Electron transfer flavoprotein subunit beta	ETFB	K.EVIAVSCGPAQC*QETIR.T		0.56	1.04		0.543689	0.981132	2	0.762411	0.309319	0.405711	-0.39136
230	P49411	TUFM Elongation factor Tu, mitochondrial	TUFM	K.GEETPVIVGSALC*ALEGRDPELGLK.S	0.86	0.79	0.76	0.811321	0.76699	0.716981	3	0.765097	0.0471983	0.0616893	-0.386285
269	Q8TDX7	NEK7 Serine/threonine-protein kinase Nek7	NEK7	K.KIEQC*DYPPLPSDHYSEELR.Q		0.81	0.79		0.786408	0.745283	2	0.765845	0.0290796	0.0379706	-0.384875
257	Q9NRZ9	HELLS Lymphoid-specific helicase	HELLS	K.C*NGQPVPFQQPK.H		0.82	0.78		0.796117	0.735849	2	0.765983	0.0426155	0.0556351	-0.384616
526	Q14974	KPNB1 Importin subunit beta-1	KPNB1	K.NSAKDC*YPAVQK.T	0.68	0.81	0.93	0.641509	0.786408	0.877358	3	0.768425	0.118948	0.154795	-0.380023
395	Q86Y56	DNAAF5 Dynein assembly factor 5, axonemal	DNAAF5	R.RPPEAC*EELR.L		0.74	0.87		0.718447	0.820755	2	0.769601	0.0723428	0.0940004	-0.377818
359	Q8TEX9	IPO4 Importin-4	IPO4	R.LAELC*GVLK.A		0.76	0.85		0.737864	0.801887	2	0.769875	0.0452709	0.0588029	-0.377303
300	B5ME19	EIF3CL Eukaryotic translation initiation factor 3 subunit	EIF3CL	K.TC*HSFIINEK.M		0.8	0.81		0.776699	0.764151	2	0.770425	0.00887284	0.0115168	-0.376274
284	Q15005	SPCS2 Signal peptidase complex subunit 2	SPCS2	R.SGGSGGC*SGAGGASNCGTGSGR.S		0.81	0.8		0.786408	0.754717	2	0.770562	0.0224088	0.0290811	-0.376016
213	P62829	RPL23 60S ribosomal protein L23	RPL23	R.ISLGLPVGAVINC*ADNTGAK.N	0.9	0.78	0.75	0.849057	0.757282	0.707547	3	0.771295	0.071788	0.0930746	-0.374645
160	P33992	MCM5 DNA replication licensing factor MCM5	MCM5	R.C*SVLAAANSVFGR.W		0.9	0.71		0.873786	0.669811	2	0.771799	0.144232	0.186878	-0.373703
151	O75462	CRLF1 Cytokine receptor-like factor 1	CRLF1	R.SGDNLVC*HAR.D		0.91	0.7		0.883495	0.660377	2	0.771936	0.157768	0.20438	-0.373446
848	Q9HCC0	MCCC2 Methylcrotonoyl-CoA carboxylase beta chain, mitoch	MCCC2	K.MVAAVAC*AQVPK.I	0.7	0.62	1.12	0.660377	0.601942	1.0566	3	0.772974	0.247362	0.320013	-0.371508
281	P78527	PRKDC DNA-dependent protein kinase catalytic subunit	PRKDC	R.FNNYVDC*MKK.F	0.93	0.71	0.8	0.877358	0.68932	0.754717	3	0.773799	0.0954603	0.123366	-0.36997
419	P78527	PRKDC DNA-dependent protein kinase catalytic subunit	PRKDC	K.LAGANPAVITC*DELLLGHEK.A		0.74	0.88		0.718447	0.830189	2	0.774318	0.0790136	0.102043	-0.369003
341	Q8TEX9	IPO4 Importin-4	IPO4	R.VRDNIC*GALAR.L		0.78	0.84		0.757282	0.792453	2	0.774867	0.0248698	0.0320956	-0.367979
462	Q9Y232	CDYL Chromodomain Y-like protein	CDYL	R.KLTAQEAC*GK.G	0.71	0.83	0.9	0.669811	0.805825	0.849057	3	0.774898	0.0935393	0.120712	-0.367922
286	O15379	HDAC3 Histone deacetylase 3	HDAC3	R.GHGEC*VEYVK.S		0.82	0.8		0.796117	0.754717	2	0.775417	0.0292739	0.0377525	-0.366956
287	Q9ULX6	AKAP8L A-kinase anchor protein 8-like	AKAP8L	R.GQC*MSGASR.L		0.82	0.8		0.796117	0.754717	2	0.775417	0.0292739	0.0377525	-0.366956
270	P50990	CCT8 T-complex protein 1 subunit theta	CCT8	K.QITSYGETC*PGLEQYAIKK.F		0.83	0.79		0.805825	0.745283	2	0.775554	0.0428098	0.055199	-0.366701
271	Q32NC0	C18orf21 UPF0711 protein C18orf21	C18orf21	R.TPTSGQSVSTC*SSK.N		0.83	0.79		0.805825	0.745283	2	0.775554	0.0428098	0.055199	-0.366701
206	P24752	ACAT1 Acetyl-CoA acetyltransferase, mitochondrial	ACAT1	K.QGEYGLASIC*NGGGGASAMLIQK.L		0.88	0.74		0.854369	0.698113	2	0.776241	0.110489	0.142339	-0.365423
193	Q9BVP2	GNL3 Guanine nucleotide-binding protein-like 3	GNL3	R.C*PQVEEAIVQSGQK.K		0.89	0.73		0.864078	0.688679	2	0.776378	0.124025	0.159749	-0.365168
101	Q1KMD3	HNRNPUL2 Heterogeneous nuclear ribonucleoprotein U-like pro	HNRNPUL2	K.GKVC*FEAK.V	1.09	0.7	0.66	1.0283	0.679612	0.622642	3	0.776852	0.219617	0.282702	-0.364289
190	P46779	RPL28 60S ribosomal protein L28	RPL28	R.NC*SSFLIK.R	0.95	0.77	0.73	0.896226	0.747573	0.688679	3	0.777493	0.10696	0.13757	-0.363099
288	Q9NQC3	RTN4 Reticulon-4	RTN4	K.YSNSALGHVNC*TIK.E	0.81	0.84	0.8	0.764151	0.815534	0.754717	3	0.778134	0.032731	0.0420635	-0.36191
27	P02765	AHSG Alpha-2-HS-glycoprotein	AHSG	K.C*DSSPDSAEDVR.K		1.11	0.51		1.07767	0.481132	2	0.779401	0.421816	0.541205	-0.359562
360	Q6NUQ4	TMEM214 Transmembrane protein 214	TMEM214	R.SSGFLPASQQAC*AK.L		0.78	0.85		0.757282	0.801887	2	0.779584	0.0315407	0.0404583	-0.359223
342	O94855	SEC24D Protein transport protein Sec24D	SEC24D	K.NC*VLLSRPEISTDER.A		0.79	0.84		0.76699	0.792453	2	0.779722	0.0180047	0.0230912	-0.358969
323	P49327	FASN Fatty acid synthase	FASN	R.DGLLENQTPEFFQDVC*KPK.Y		0.8	0.83		0.776699	0.783019	2	0.779859	0.0044688	0.00573027	-0.358715
420	P08670	VIM Vimentin	VIM	R.QVQSLTC*EVDALK.G	0.82	0.76	0.88	0.773585	0.737864	0.830189	3	0.780546	0.0465543	0.0596432	-0.357445
259	P0CG22	DHRS4L1 Putative dehydrogenase/reductase SDR family member	DHRS4L1	R.VNC*LAPGLIK.T		0.85	0.78		0.825243	0.735849	2	0.780546	0.0632109	0.0809829	-0.357445
258	Q9BTX1	NDC1 Nucleoporin NDC1	NDC1	R.MAGIFDVNTC*YGSPQSPQLIR.R		0.85	0.78		0.825243	0.735849	2	0.780546	0.0632109	0.0809829	-0.357445
762	Q01518	CAP1 Adenylyl cyclase-associated protein 1	CAP1	K.TDGC*HAYLSK.N	0.64	0.76	1.06	0.603774	0.737864	1	3	0.780546	0.201532	0.258194	-0.357445
582	Q9UBS0	RPS6KB2 Ribosomal protein S6 kinase beta-2	RPS6KB2	R.VDPPFRPC*LQSEEDVSQFDTR.F	0.59	0.91	0.96	0.556604	0.883495	0.90566	3	0.78192	0.195444	0.249954	-0.354908
504	O75940	SMNDC1 Survival of motor neuron-related-splicing factor 3	SMNDC1	K.VGVGTC*GIADKPMTQYQDTSKYNVR.H		0.72	0.92		0.699029	0.867925	2	0.783477	0.119427	0.152432	-0.352037
458	O60716	CTNND1 Catenin delta-1	CTNND1	K.NC*DGVPALVR.L		0.74	0.9		0.718447	0.849057	2	0.783752	0.0923552	0.117837	-0.351532
457	Q9UBB4	ATXN10 Ataxin-10	ATXN10	R.LIGNLC*YK.N		0.74	0.9		0.718447	0.849057	2	0.783752	0.0923552	0.117837	-0.351532
207	Q8IZL8	PELP1 Proline-, glutamic acid- and leucine-rich protein	PELP1	K.AC*MTYFPR.A		0.9	0.74		0.873786	0.698113	2	0.78595	0.12422	0.15805	-0.347491
759	Q14137	BOP1 Ribosome biogenesis protein BOP1	BOP1	R.DLQPFPTC*QALVYR.G		0.59	1.06		0.572816	1	2	0.786408	0.302065	0.384107	-0.346651
65	P42704	LRPPRC Leucine-rich PPR motif-containing protein, mitocho	LRPPRC	K.GMQELGVHPDQETYTDYVIPC*FDSVNSAR.A		1.03	0.61		1	0.575472	2	0.787736	0.300187	0.381076	-0.344216
442	P22102	GART Trifunctional purine biosynthetic protein adenosin	GART	K.SKEEAC*K.A		0.76	0.89		0.737864	0.839623	2	0.788743	0.0719542	0.0912263	-0.342372
396	Q6P2Q9	PRPF8 Pre-mRNA-processing-splicing factor 8	PRPF8	R.GATVDKTVC*KK.N		0.78	0.87		0.757282	0.820755	2	0.789018	0.0448823	0.0568837	-0.34187
372	O60763	USO1 General vesicular transport factor p115	USO1	R.VLVSPTNPPGATSSC*QK.A		0.79	0.86		0.76699	0.811321	2	0.789156	0.0313464	0.0397214	-0.341618
301	P49207	RPL34 60S ribosomal protein L34	RPL34	K.SAC*GVCPGR.L		0.84	0.81		0.815534	0.764151	2	0.789842	0.0363333	0.0460007	-0.340363
604	P50991	CCT4 T-complex protein 1 subunit delta	CCT4	K.AQDIEAGDGTTSVVIIAGSLLDSC*TK.L		0.68	0.98		0.660194	0.924528	2	0.792361	0.186912	0.235893	-0.33577
593	Q7Z3K3	POGZ Pogo transposable element with ZNF domain	POGZ	K.IQPLDVC*IKR.T		0.69	0.97		0.669903	0.915094	2	0.792499	0.173377	0.218772	-0.33552
525	O95573	ACSL3 Long-chain-fatty-acid--CoA ligase 3	ACSL3	R.NTPLC*DSFVFRK.V		0.73	0.93		0.708738	0.877358	2	0.793048	0.119233	0.150347	-0.33452
399	P62333	PSMC6 26S proteasome regulatory subunit 10B	PSMC6	K.GC*LLYGPPGTGK.T	0.78	0.85	0.87	0.735849	0.825243	0.820755	3	0.793949	0.0503659	0.0634372	-0.332882
951	Q00610	CLTC Clathrin heavy chain 1	CLTC	R.HSSLAGC*QIINYR.T	0.64	0.67	1.2	0.603774	0.650485	1.13208	3	0.795445	0.292465	0.367674	-0.330166
505	O00410	IPO5 Importin-5	IPO5	K.LC*GDTSLNNMQR.Q		0.75	0.92		0.728155	0.867925	2	0.79804	0.0988317	0.123843	-0.325467
484	P02462	COL4A1 Collagen alpha-1(IV) chain	COL4A1	R.AHGQDLGTAGSC*LR.K		0.76	0.91		0.737864	0.858491	2	0.798177	0.0852958	0.106863	-0.325219
444	P46940	IQGAP1 Ras GTPase-activating-like protein IQGAP1	IQGAP1	K.SYIKTC*LDNLASK.G		0.78	0.89		0.757282	0.839623	2	0.798452	0.0582239	0.072921	-0.324722
375	Q12769	NUP160 Nuclear pore complex protein Nup160	NUP160	K.RNHDGEC*TAAPTNR.Q		0.81	0.86		0.786408	0.811321	2	0.798864	0.0176161	0.0220515	-0.323978
376	Q9H1C4	UNC93B1 Protein unc-93 homolog B1	UNC93B1	R.RPC*PYEQAQGGDGPEEQ.-		0.81	0.86		0.786408	0.811321	2	0.798864	0.0176161	0.0220515	-0.323978
116	P46013	MKI67 Proliferation marker protein Ki-67	MKI67	R.SQHDILQMIC*SK.R	1.09	0.76	0.67	1.0283	0.737864	0.632075	3	0.799414	0.205159	0.256637	-0.322986
302	Q9P2X0	DPM3 Dolichol-phosphate mannosyltransferase subunit 3	DPM3	R.VATFHDC*EDAAR.E		0.86	0.81		0.834951	0.764151	2	0.799551	0.0500635	0.0626145	-0.322738
607	P35579	MYH9 Myosin-9	MYH9	R.NC*AAYLK.L	0.71	0.83	0.98	0.669811	0.805825	0.924528	3	0.800055	0.127456	0.15931	-0.321829
217	P42356	PI4KA Phosphatidylinositol 4-kinase alpha	PI4KA	R.GGGGGGGGGGGC*SGSGSSASR.G		0.92	0.75		0.893204	0.707547	2	0.800376	0.131279	0.164022	-0.321251
803	Q9C0C9	UBE2O (E3-independent) E2 ubiquitin-conjugating enzyme	UBE2O	K.SFC*PGGTDSVSPPPSVITQENLGR.V		0.59	1.09		0.572816	1.0283	2	0.800559	0.322077	0.402316	-0.320921
548	P61247	RPS3A 40S ribosomal protein S3a	RPS3A	K.AC*QSIYPLHDVFVR.K	0.67	0.91	0.94	0.632075	0.883495	0.886792	3	0.800788	0.146118	0.182468	-0.320508
4	P34932	HSPA4 Heat shock 70 kDa protein 4	HSPA4	K.KLMSANASDLPLSIEC*FMNDVDVSGTMNR.G	0.92	1.27	0.32	0.867925	1.23301	0.301887	3	0.80094	0.469162	0.585764	-0.320233
421	Q12788	TBL3 Transducin beta-like protein 3	TBL3	R.RDPEAC*EK.L		0.8	0.88		0.776699	0.830189	2	0.803444	0.0378229	0.047076	-0.315731
379	O60716	CTNND1 Catenin delta-1	CTNND1	R.YQEAAPNVANNTGPHAASC*FGAK.K		0.82	0.86		0.796117	0.811321	2	0.803719	0.010751	0.0133766	-0.315238
378	O75533	SF3B1 Splicing factor 3B subunit 1	SF3B1	K.VQENC*IDLVGR.I		0.82	0.86		0.796117	0.811321	2	0.803719	0.010751	0.0133766	-0.315238
361	O75694	NUP155 Nuclear pore complex protein Nup155	NUP155	R.EITAIESSVPC*QLLESVLQELK.G		0.83	0.85		0.805825	0.801887	2	0.803856	0.0027849	0.00346443	-0.314991
324	P37235	HPCAL1 Hippocalcin-like protein 1	HPCAL1	R.LLQC*DPSSASQF.-		0.85	0.83		0.825243	0.783019	2	0.804131	0.0298568	0.0371292	-0.314498
325	P46060	RANGAP1 Ran GTPase-activating protein 1	RANGAP1	K.LNNC*GMGIGGGK.I		0.85	0.83		0.825243	0.783019	2	0.804131	0.0298568	0.0371292	-0.314498
272	P62987	UBA52 Ubiquitin-60S ribosomal protein L40	UBA52	R.QLAQKYNC*DK.M		0.89	0.79		0.864078	0.745283	2	0.80468	0.0840005	0.10439	-0.313512
671	O00410	IPO5 Importin-5	IPO5	K.TKENVNATENC*ISAVGK.I		0.67	1.02		0.650485	0.962264	2	0.806375	0.220461	0.273397	-0.310478
289	P51553	IDH3G Isocitrate dehydrogenase [NAD] subunit gamma, mito	IDH3G	R.TSLDLYANVIHC*K.S	0.9	0.84	0.8	0.849057	0.815534	0.754717	3	0.806436	0.0478234	0.0593021	-0.310368
506	Q9NVI1	FANCI Fanconi anemia group I protein	FANCI	K.GVLSGEEC*KK.Q		0.77	0.92		0.747573	0.867925	2	0.807749	0.0851015	0.105356	-0.308022
398	P61289	PSME3 Proteasome activator complex subunit 3	PSME3	R.LLIEKC*NTVK.M		0.82	0.87		0.796117	0.820755	2	0.808436	0.0174218	0.0215501	-0.306795
362	P00367	GLUD1 Glutamate dehydrogenase 1, mitochondrial	GLUD1	K.C*AVVDVPFGGAK.A		0.84	0.85		0.815534	0.801887	2	0.80871	0.00965002	0.0119326	-0.306305
422	Q8TDN6	BRIX1 Ribosome biogenesis protein BRX1 homolog	BRIX1	R.DRIPGPVC*K.G	0.83	0.84	0.88	0.783019	0.815534	0.830189	3	0.809581	0.0241419	0.0298202	-0.304754
260	P56192	MARS Methionine--tRNA ligase, cytoplasmic	MARS	R.LFVSDGVPGC*LPVLAAAGR.A		0.91	0.78		0.883495	0.735849	2	0.809672	0.104402	0.128943	-0.30459
578	P40227	CCT6A T-complex protein 1 subunit zeta	CCT6A	K.VC*GDSDKGFVVINQK.G		0.74	0.96		0.718447	0.90566	2	0.812053	0.13238	0.163019	-0.300353
377	Q1KMD3	HNRNPUL2 Heterogeneous nuclear ribonucleoprotein U-like pro	HNRNPUL2	K.ANFSLPEKC*DYMDEVTYGELEKEEAQPIVTK.Y	0.88	0.82	0.86	0.830189	0.796117	0.811321	3	0.812542	0.0170689	0.0210068	-0.299486
285	P24752	ACAT1 Acetyl-CoA acetyltransferase, mitochondrial	ACAT1	K.DGLTDVYNKIHMGSC*AENTAK.K	0.94	0.82	0.8	0.886792	0.796117	0.754717	3	0.812542	0.0675524	0.0831371	-0.299486
605	O00571	DDX3X ATP-dependent RNA helicase DDX3X	DDX3X	R.WC*DKSDEDDWSKPLPPSER.L	0.76	0.82	0.98	0.716981	0.796117	0.924528	3	0.812542	0.104744	0.128909	-0.299486
471	Q07020	RPL18 60S ribosomal protein L18	RPL18	K.GC*GTVLLSGPR.K	0.73	0.93	0.9	0.688679	0.902913	0.849057	3	0.813549	0.111443	0.136984	-0.297698
344	Q9Y277	VDAC3 Voltage-dependent anion-selective channel protein	VDAC3	K.SC*SGVEFSTSGHAYTDTGK.A		0.86	0.84		0.834951	0.792453	2	0.813702	0.0300511	0.0369313	-0.297427
459	Q14318	FKBP8 Peptidyl-prolyl cis-trans isomerase FKBP8	FKBP8	R.SC*SLVLEHQPDNIK.A	0.91	0.76	0.9	0.858491	0.737864	0.849057	3	0.815137	0.0670864	0.0823008	-0.294885
672	Q9UMS4	PRPF19 Pre-mRNA-processing factor 19	PRPF19	R.IWSVPNASC*VQVVR.A		0.69	1.02		0.669903	0.962264	2	0.816084	0.206731	0.25332	-0.293211
579	P62917	RPL8 60S ribosomal protein L8	RPL8	K.AQLNIGNVLPVGTMPEGTIVC*CLEEKPGDR.G		0.75	0.96		0.728155	0.90566	2	0.816908	0.125515	0.153646	-0.291755
460	Q9NRX1	PNO1 RNA-binding protein PNO1	PNO1	R.TAIC*NLILGNPPSK.V		0.81	0.9		0.786408	0.849057	2	0.817732	0.0442994	0.0541735	-0.2903
509	Q00839	HNRNPU Heterogeneous nuclear ribonucleoprotein U	HNRNPU	K.AVVVC*PK.D	0.8	0.86	0.92	0.754717	0.834951	0.867925	3	0.819198	0.0582248	0.0710754	-0.287717
261	Q9Y277	VDAC3 Voltage-dependent anion-selective channel protein	VDAC3	K.YMLDC*R.T		0.93	0.78		0.902913	0.735849	2	0.819381	0.118132	0.144172	-0.287394
443	Q5T160	RARS2 Probable arginine--tRNA ligase, mitochondrial	RARS2	R.AIAC*QLSR.V	0.93	0.77	0.89	0.877358	0.747573	0.839623	3	0.821518	0.0667601	0.0812644	-0.283636
507	O95573	ACSL3 Long-chain-fatty-acid--CoA ligase 3	ACSL3	R.LLLC*GGAPLSATTQR.F		0.8	0.92		0.776699	0.867925	2	0.822312	0.0645062	0.0784449	-0.282243
485	P53990	IST1 IST1 homolog	IST1	K.IVADQLC*AK.Y		0.81	0.91		0.786408	0.858491	2	0.822449	0.0509702	0.0619737	-0.282002
461	Q14008	CKAP5 Cytoskeleton-associated protein 5	CKAP5	R.MC*LVYPASK.M		0.82	0.9		0.796117	0.849057	2	0.822587	0.0374343	0.045508	-0.281761
348	P45880	VDAC2 Voltage-dependent anion-selective channel protein	VDAC2	K.WNTDNTLGTEIAIEDQIC*QGLK.L	0.79	0.96	0.84	0.745283	0.932039	0.792453	3	0.823258	0.0971142	0.117963	-0.280583
326	Q14197	MRPL58 Peptidyl-tRNA hydrolase ICT1, mitochondrial	MRPL58	R.LTISYC*R.S		0.89	0.83		0.864078	0.783019	2	0.823548	0.0573172	0.0695979	-0.280075
64	Q6P996	PDXDC1 Pyridoxal-dependent decarboxylase domain-containin	PDXDC1	R.HSC*DALNR.W	1.19	0.8	0.61	1.12264	0.776699	0.575472	3	0.824937	0.276756	0.335487	-0.277643
402	P46782	RPS5 40S ribosomal protein S5	RPS5	K.AQC*PIVER.L	0.84	0.89	0.87	0.792453	0.864078	0.820755	3	0.825762	0.036074	0.0436857	-0.276203
566	P40855	PEX19 Peroxisomal biogenesis factor 19	PEX19	R.VGSDMTSQQEFTSC*LK.E		0.78	0.95		0.757282	0.896226	2	0.826754	0.0982489	0.118837	-0.27447
315	Q13418	ILK Integrin-linked protein kinase	ILK	K.SRDFNEEC*PR.L	1.03	0.76	0.82	0.971698	0.737864	0.773585	3	0.827716	0.125965	0.152184	-0.272793
381	O14950	MYL12B Myosin regulatory light chain 12B	MYL12B	K.LNGTDPEDVIRNAFAC*FDEEATGTIQEDYLR.E		0.87	0.86		0.84466	0.811321	2	0.82799	0.0235745	0.028472	-0.272314
363	P35998	PSMC2 26S proteasome regulatory subunit 7	PSMC2	R.LC*PNSTGAEIR.S		0.88	0.85		0.854369	0.801887	2	0.828128	0.0371105	0.0448125	-0.272075
303	Q8N3U4	STAG2 Cohesin subunit SA-2	STAG2	R.QAAEC*HPPVGR.G		0.92	0.81		0.893204	0.764151	2	0.828677	0.0912542	0.11012	-0.271117
69	Q86VP6	CAND1 Cullin-associated NEDD8-dissociated protein 1	CAND1	R.NVVAEC*LGK.L		1.11	0.62		1.07767	0.584906	2	0.831288	0.348437	0.419153	-0.26658
527	Q9UJZ1	STOML2 Stomatin-like protein 2, mitochondrial	STOML2	R.ERESLNASIVDAINQAADC*WGIR.C		0.81	0.93		0.786408	0.877358	2	0.831883	0.0643119	0.0773088	-0.265547
530	Q00839	HNRNPU Heterogeneous nuclear ribonucleoprotein U	HNRNPU	K.GNFTLPEVAEC*FDEITYVELQK.E	0.8	0.89	0.93	0.754717	0.864078	0.877358	3	0.832051	0.0673017	0.0808865	-0.265256
464	P23258	TUBG1 Tubulin gamma-1 chain	TUBG1	K.RLTQNADC*VVVLDNTALNR.I		0.84	0.9		0.815534	0.849057	2	0.832295	0.0237041	0.0284804	-0.264833
463	P49327	FASN Fatty acid synthase	FASN	R.LSIPTYGLQC*TR.A		0.84	0.9		0.815534	0.849057	2	0.832295	0.0237041	0.0284804	-0.264833
290	P36578	RPL4 60S ribosomal protein L4	RPL4	R.FC*IWTESAFR.K	0.89	0.93	0.8	0.839623	0.902913	0.754717	3	0.832417	0.0743601	0.0893303	-0.264621
400	Q96QK1	VPS35 Vacuolar protein sorting-associated protein 35	VPS35	R.VMEC*LKK.A		0.87	0.87		0.84466	0.820755	2	0.832707	0.0169037	0.0202997	-0.264118
508	P05388	RPLP0 60S acidic ribosomal protein P0	RPLP0	R.AGAIAPC*EVTVPAQNTGLGPEK.T		0.83	0.92		0.805825	0.867925	2	0.836875	0.0439108	0.05247	-0.256916
1061	Q9NSV4	DIAPH3 Protein diaphanous homolog 3	DIAPH3	R.SHYNINC*NSTR.T	0.61	0.76	1.27	0.575472	0.737864	1.19811	3	0.83715	0.322977	0.385805	-0.256443
215	Q03405	PLAUR Urokinase plasminogen activator surface receptor	PLAUR	R.HQSLQC*R.S	1.09	0.8	0.75	1.0283	0.776699	0.707547	3	0.837516	0.168804	0.201554	-0.255811
262	P49368	CCT3 T-complex protein 1 subunit gamma	CCT3	R.AKHTQENC*ETWGVNGETGTLVDMK.E		0.97	0.78		0.941748	0.735849	2	0.838798	0.145592	0.173572	-0.253604
673	Q14137	BOP1 Ribosome biogenesis protein BOP1	BOP1	K.TTEEQVQASTPC*PR.T		0.74	1.02		0.718447	0.962264	2	0.840355	0.172405	0.205157	-0.250929
397	O43169	CYB5B Cytochrome b5 type B	CYB5B	K.QYYIGDIHPSDLKPESGSKDPSKNDTC*K.S	0.96	0.82	0.87	0.90566	0.796117	0.820755	3	0.840844	0.0574686	0.0683464	-0.25009
513	P36873	PPP1CC Serine/threonine-protein phosphatase PP1-gamma cat	PPP1CC	R.GNHEC*ASINR.I	0.78	0.95	0.92	0.735849	0.92233	0.867925	3	0.842035	0.0958984	0.113889	-0.248049
383	P17302	GJA1 Gap junction alpha-1 protein	GJA1	K.LVTGDRNNSSC*R.N		0.9	0.86		0.873786	0.811321	2	0.842554	0.0441699	0.0524238	-0.24716
382	Q96D53	COQ8B Atypical kinase COQ8B, mitochondrial	COQ8B	R.IVQTLC*TVR.G		0.9	0.86		0.873786	0.811321	2	0.842554	0.0441699	0.0524238	-0.24716
346	Q6YN16	HSDL2 Hydroxysteroid dehydrogenase-like protein 2	HSDL2	K.TAIHTAAMDMLGGPGIESQC*R.K		0.92	0.84		0.893204	0.792453	2	0.842828	0.0712418	0.084527	-0.246689
291	P53350	PLK1 Serine/threonine-protein kinase PLK1	PLK1	K.TLC*GTPNYIAPEVLSK.K		0.96	0.8		0.932039	0.754717	2	0.843378	0.125385	0.148671	-0.245749
653	P07900	HSP90AA1 Heat shock protein HSP 90-alpha	HSP90AA1	K.TKFENLC*K.I	0.81	0.84	1.01	0.764151	0.815534	0.95283	3	0.844172	0.0975451	0.115551	-0.244392
194	Q9Y2R9	MRPS7 28S ribosomal protein S7, mitochondrial	MRPS7	K.NC*EPMIGLVPILK.G		1.03	0.73		1	0.688679	2	0.84434	0.220137	0.260721	-0.244105
141	Q5VTL8	PRPF38B Pre-mRNA-splicing factor 38B	PRPF38B	K.TAGQTGMC*GGVR.G	1.02	0.95	0.69	0.962264	0.92233	0.650943	3	0.845179	0.169394	0.200424	-0.242671
545	Q9NUL3	STAU2 Double-stranded RNA-binding protein Staufen homolo	STAU2	K.GSSPTPPC*SPVQPSK.Q		0.83	0.94		0.805825	0.886792	2	0.846309	0.0572525	0.0676496	-0.240744
466	Q92616	GCN1 eIF-2-alpha kinase activator GCN1	GCN1	K.C*LQTLLDTK.F		0.87	0.9		0.84466	0.849057	2	0.846858	0.00310873	0.0036709	-0.239807
423	P35052	GPC1 Glypican-1	GPC1	K.VIQGC*GNPK.V		0.89	0.88		0.864078	0.830189	2	0.847133	0.0239631	0.0282873	-0.239339
1002	Q15366	PCBP2 Poly(rC)-binding protein 2	PCBP2	R.AITIAGIPQSIIEC*VK.Q	0.6	0.84	1.23	0.566038	0.815534	1.16038	3	0.847316	0.298442	0.35222	-0.239027
674	P50991	CCT4 T-complex protein 1 subunit delta	CCT4	K.ITGC*ASPGK.T		0.76	1.02		0.737864	0.962264	2	0.850064	0.158675	0.186662	-0.234356
763	Q15365	PCBP1 Poly(rC)-binding protein 1	PCBP1	R.AITIAGVPQSVTEC*VK.Q	0.74	0.88	1.06	0.698113	0.854369	1	3	0.850827	0.150975	0.177444	-0.233062
528	O75934	BCAS2 Pre-mRNA-splicing factor SPF27	BCAS2	R.IENLELMSQHGC*NAWK.V		0.85	0.93		0.825243	0.877358	2	0.851301	0.0368514	0.0432884	-0.232259
510	P54886	ALDH18A1 Delta-1-pyrroline-5-carboxylate synthase	ALDH18A1	K.LGSAVVTRGDEC*GLALGR.L		0.86	0.92		0.834951	0.867925	2	0.851438	0.0233155	0.0273837	-0.232027
467	Q14318	FKBP8 Peptidyl-prolyl cis-trans isomerase FKBP8	FKBP8	K.C*LNNLAASQLK.L		0.88	0.9		0.854369	0.849057	2	0.851713	0.00375638	0.00441039	-0.231561
347	P50914	RPL14 60S ribosomal protein L14	RPL14	R.ALVDGPC*TQVR.R		0.94	0.84		0.912621	0.792453	2	0.852537	0.084972	0.0996695	-0.230165
328	O60701	UGDH UDP-glucose 6-dehydrogenase	UGDH	K.ASVGFGGSC*FQK.D		0.95	0.83		0.92233	0.783019	2	0.852674	0.0985079	0.115528	-0.229933
329	Q08945	SSRP1 FACT complex subunit SSRP1	SSRP1	K.FGGQLLSFDIGDQPVFEIPLSNVSQC*TTGK.N		0.95	0.83		0.92233	0.783019	2	0.852674	0.0985079	0.115528	-0.229933
330	Q5VV42	CDKAL1 Threonylcarbamoyladenosine tRNA methylthiotransfer	CDKAL1	K.IVLAGC*VPQAQPR.Q		0.95	0.83		0.92233	0.783019	2	0.852674	0.0985079	0.115528	-0.229933
292	Q14204	DYNC1H1 Cytoplasmic dynein 1 heavy chain 1	DYNC1H1	R.LSC*LPAFK.D		0.98	0.8		0.951456	0.754717	2	0.853087	0.139116	0.163073	-0.229236
219	P37268	FDFT1 Squalene synthase	FDFT1	R.TQNLPNC*QLISR.S		1.03	0.75		1	0.707547	2	0.853774	0.206795	0.242213	-0.228075
218	Q9NXV6	CDKN2AIP CDKN2A-interacting protein	CDKN2AIP	R.ASAQQENSSTC*IGSAIK.S		1.03	0.75		1	0.707547	2	0.853774	0.206795	0.242213	-0.228075
760	Q86WB0	ZC3HC1 Nuclear-interacting partner of ALK	ZC3HC1	R.ARLC*SSSSSDTSSR.S		0.73	1.06		0.708738	1	2	0.854369	0.205953	0.241059	-0.227069
636	Q00610	CLTC Clathrin heavy chain 1	CLTC	K.YIQAAC*K.T		0.79	1		0.76699	0.943396	2	0.855193	0.124738	0.145859	-0.225678
652	Q7Z2W4	ZC3HAV1 Zinc finger CCCH-type antiviral protein 1	ZC3HAV1	R.SC*TPSPDQISHR.A	0.86	0.83	1.01	0.811321	0.805825	0.95283	3	0.856659	0.0833322	0.0972759	-0.223208
446	P60468	SEC61B Protein transport protein Sec61 subunit beta	SEC61B	K.NASC*GTR.S		0.9	0.89		0.873786	0.839623	2	0.856705	0.0241574	0.0281981	-0.22313
654	Q13283	G3BP1 Ras GTPase-activating protein-binding protein 1	G3BP1	K.VMSQNFTNC*HTK.I	0.85	0.84	1.01	0.801887	0.815534	0.95283	3	0.85675	0.0834869	0.097446	-0.223053
424	Q96SK2	TMEM209 Transmembrane protein 209	TMEM209	K.FTTSC*MTGYSPQLQGLSSGGSGSYSPGVTYSPVSGYNK.L		0.91	0.88		0.883495	0.830189	2	0.856842	0.0376934	0.043991	-0.222899
380	Q00839	HNRNPU Heterogeneous nuclear ribonucleoprotein U	HNRNPU	R.APQC*LGK.F	0.98	0.86	0.86	0.924528	0.834951	0.811321	3	0.856934	0.0597193	0.0696895	-0.222745
403	P83881	RPL36A 60S ribosomal protein L36a	RPL36A	R.LEC*VEPNCR.S		0.92	0.87		0.893204	0.820755	2	0.856979	0.0512293	0.0597789	-0.222668
445	Q99714	HSD17B10 3-hydroxyacyl-CoA dehydrogenase type-2	HSD17B10	K.KLGNNC*VFAPADVTSEK.D	0.91	0.9	0.89	0.858491	0.873786	0.839623	3	0.8573	0.017113	0.0199615	-0.222128
761	Q10589	BST2 Bone marrow stromal antigen 2	BST2	K.ANSEAC*R.D		0.74	1.06		0.718447	1	2	0.859223	0.199088	0.231707	-0.218895
283	Q9BVP2	GNL3 Guanine nucleotide-binding protein-like 3	GNL3	K.LETNPDIKPSNVEPMEKEFGLC*K.T	1.14	0.77	0.8	1.07547	0.747573	0.754717	3	0.859254	0.187284	0.217961	-0.218844
780	Q00610	CLTC Clathrin heavy chain 1	CLTC	R.AHIAQLC*EK.A	0.82	0.82	1.07	0.773585	0.796117	1.00943	3	0.859712	0.130152	0.15139	-0.218075
675	P08237	PFKM ATP-dependent 6-phosphofructokinase, muscle type	PFKM	R.IFANTPDSGC*VLGMR.K		0.78	1.02		0.757282	0.962264	2	0.859773	0.144945	0.168585	-0.217973
637	P62333	PSMC6 26S proteasome regulatory subunit 10B	PSMC6	R.NVC*TEAGMFAIR.A		0.8	1		0.776699	0.943396	2	0.860048	0.117873	0.137054	-0.217512
606	Q14204	DYNC1H1 Cytoplasmic dynein 1 heavy chain 1	DYNC1H1	K.VQYPQSQAC*K.M		0.82	0.98		0.796117	0.924528	2	0.860322	0.0908009	0.105543	-0.217051
345	P36578	RPL4 60S ribosomal protein L4	RPL4	R.SGQGAFGNMC*R.G	0.98	0.89	0.84	0.924528	0.864078	0.792453	3	0.860353	0.0661165	0.0768481	-0.216999
580	Q9H3U1	UNC45A Protein unc-45 homolog A	UNC45A	R.TLVGIC*SEHQSR.T		0.84	0.96		0.815534	0.90566	2	0.860597	0.063729	0.0740521	-0.21659
427	Q8NBU5	ATAD1 ATPase family AAA domain-containing protein 1	ATAD1	K.SKDAAFQNVLTHVC*LD.-	0.87	0.96	0.88	0.820755	0.932039	0.830189	3	0.860994	0.0617071	0.0716696	-0.215925
821	P26641	EEF1G Elongation factor 1-gamma	EEF1G	R.AVLGEVKLC*EK.M	0.65	0.96	1.1	0.613208	0.932039	1.03774	3	0.860994	0.221001	0.256682	-0.215925
469	Q8IX01	SUGP2 SURP and G-patch domain-containing protein 2	SUGP2	R.GADQKPTSADC*AVR.A		0.9	0.9		0.873786	0.849057	2	0.861422	0.0174866	0.0202997	-0.215209
425	P23396	RPS3 40S ribosomal protein S3	RPS3	R.GLC*AIAQAESLR.Y	0.9	0.94	0.88	0.849057	0.912621	0.830189	3	0.863956	0.0431888	0.0499896	-0.210971
869	P23526	AHCY Adenosylhomocysteinase	AHCY	K.SKFDNLYGC*R.E	0.82	0.78	1.13	0.773585	0.757282	1.06604	3	0.865635	0.173745	0.200714	-0.20817
546	Q99832	CCT7 T-complex protein 1 subunit eta	CCT7	K.C*AMTALSSK.L		0.87	0.94		0.84466	0.886792	2	0.865726	0.029792	0.0344127	-0.208017
529	Q9BV79	MECR Enoyl-[acyl-carrier-protein] reductase, mitochondr	MECR	R.LALNC*VGGK.S		0.88	0.93		0.854369	0.877358	2	0.865864	0.0162561	0.0187744	-0.207788
849	Q01518	CAP1 Adenylyl cyclase-associated protein 1	CAP1	K.GKINSITVDNC*K.K	0.79	0.82	1.12	0.745283	0.796117	1.0566	3	0.866001	0.167012	0.192854	-0.207559
486	Q99567	NUP88 Nuclear pore complex protein Nup88	NUP88	K.ASEKDIAPPPEEC*LQLLSR.A		0.9	0.91		0.873786	0.858491	2	0.866138	0.0108158	0.0124874	-0.20733
384	Q92878	RAD50 DNA repair protein RAD50	RAD50	K.C*SVSSLGFNVH.-		0.95	0.86		0.92233	0.811321	2	0.866825	0.0784955	0.0905551	-0.206187
350	Q1KMD3	HNRNPUL2 Heterogeneous nuclear ribonucleoprotein U-like pro	HNRNPUL2	K.VTQNLPMKEGC*TEVSLLR.V	0.87	1.02	0.84	0.820755	0.990291	0.792453	3	0.867833	0.106992	0.123286	-0.204511
638	Q8WUM4	PDCD6IP Programmed cell death 6-interacting protein	PDCD6IP	K.FIQQTYPSGGEEQAQYC*R.A		0.82	1		0.796117	0.943396	2	0.869756	0.104142	0.119738	-0.201317
387	P26640	VARS Valine--tRNA ligase	VARS	R.IC*LQPPPTSR.T		0.96	0.86		0.932039	0.811321	2	0.87168	0.0853606	0.0979265	-0.19813
386	P35579	MYH9 Myosin-9	MYH9	R.EDQSILC*TGESGAGK.T		0.96	0.86		0.932039	0.811321	2	0.87168	0.0853606	0.0979265	-0.19813
617	Q16181	SEPT7 Septin-7	44081	K.ADTLTPEEC*QQFKK.Q	0.65	1.11	0.98	0.613208	1.07767	0.924528	3	0.871802	0.236678	0.271481	-0.197928
639	P50991	CCT4 T-complex protein 1 subunit delta	CCT4	R.TLSGMESYC*VR.A		0.83	1		0.805825	0.943396	2	0.874611	0.0972774	0.111224	-0.193287
624	Q9UMY4	SNX12 Sorting nexin-12	SNX12	K.LKESC*VR.R		0.84	0.99		0.815534	0.933962	2	0.874748	0.0837414	0.0957321	-0.19306
532	P35579	MYH9 Myosin-9	MYH9	K.FSKVEDMAELTC*LNEASVLHNLK.E		0.9	0.93		0.873786	0.877358	2	0.875572	0.00252584	0.00288479	-0.191702
531	P55060	CSE1L Exportin-2	CSE1L	K.LSTAC*PGR.V		0.9	0.93		0.873786	0.877358	2	0.875572	0.00252584	0.00288479	-0.191702
216	P11940	PABPC1 Polyadenylate-binding protein 1	PABPC1	K.VVC*DENGSK.G	1.15	0.86	0.75	1.08491	0.834951	0.707547	3	0.875801	0.191967	0.21919	-0.191324
488	Q13155	AIMP2 Aminoacyl tRNA synthase complex-interacting multif	AIMP2	K.FSIQTMC*PIEGEGNIAR.F		0.92	0.91		0.893204	0.858491	2	0.875847	0.024546	0.0280255	-0.191249
678	Q00610	CLTC Clathrin heavy chain 1	CLTC	R.IHEGC*EEPATHNALAK.I	0.85	0.89	1.02	0.801887	0.864078	0.962264	3	0.876076	0.0808591	0.0922969	-0.190872
426	Q14204	DYNC1H1 Cytoplasmic dynein 1 heavy chain 1	DYNC1H1	K.TSAPITC*ELLNK.Q		0.95	0.88		0.92233	0.830189	2	0.876259	0.0651538	0.0743545	-0.19057
331	Q8NBP7	PCSK9 Proprotein convertase subtilisin/kexin type 9	PCSK9	R.GQPNQC*VGHR.E		1	0.83		0.970874	0.783019	2	0.876946	0.132833	0.151473	-0.18944
723	B5ME19	EIF3CL Eukaryotic translation initiation factor 3 subunit	EIF3CL	R.GC*ILTLVER.M		0.8	1.04		0.776699	0.981132	2	0.878916	0.144556	0.164471	-0.186204
472	P36578	RPL4 60S ribosomal protein L4	RPL4	R.GPC*IIYNEDNGIIK.A	0.94	0.93	0.9	0.886792	0.902913	0.849057	3	0.879587	0.0276415	0.0314256	-0.185101
581	O00154	ACOT7 Cytosolic acyl coenzyme A thioester hydrolase	ACOT7	R.HC*NSQNGER.C		0.88	0.96		0.854369	0.90566	2	0.880015	0.0362685	0.0412136	-0.184401
489	Q99832	CCT7 T-complex protein 1 subunit eta	CCT7	R.QLC*DNAGFDATNILNK.L		0.93	0.91		0.902913	0.858491	2	0.880702	0.0314111	0.035666	-0.183275
405	Q96PK6	RBM14 RNA-binding protein 14	RBM14	K.IFVGNVSAAC*TSQELR.S		0.97	0.87		0.941748	0.820755	2	0.881251	0.0855549	0.0970834	-0.182375
349	P48681	NES Nestin	NES	R.AVEAEKC*AR.A		1	0.84		0.970874	0.792453	2	0.881663	0.126163	0.143096	-0.1817
547	Q9Y277	VDAC3 Voltage-dependent anion-selective channel protein	VDAC3	K.ASGNLETKYKVC*NYGLTFTQK.W	0.94	0.9	0.94	0.886792	0.873786	0.886792	3	0.882457	0.00750904	0.00850924	-0.180402
681	P10620	MGST1 Microsomal glutathione S-transferase 1	MGST1	K.VFANPEDC*VAFGK.G	0.84	0.92	1.02	0.792453	0.893204	0.962264	3	0.88264	0.0853971	0.0967519	-0.180102
567	P49368	CCT3 T-complex protein 1 subunit gamma	CCT3	K.IPGGIIEDSC*VLR.G		0.9	0.95		0.873786	0.896226	2	0.885006	0.0158675	0.0179292	-0.17624
568	Q9UBU9	NXF1 Nuclear RNA export factor 1	NXF1	R.SC*MAATLR.I		0.9	0.95		0.873786	0.896226	2	0.885006	0.0158675	0.0179292	-0.17624
401	Q6UB35	MTHFD1L Monofunctional C1-tetrahydrofolate synthase, mitoc	MTHFD1L	K.VGC*GSPR.I	1.04	0.88	0.87	0.981132	0.854369	0.820755	3	0.885419	0.0845771	0.0955222	-0.175568
511	P62333	PSMC6 26S proteasome regulatory subunit 10B	PSMC6	R.AVASQLDC*NFLK.V		0.93	0.92		0.902913	0.867925	2	0.885419	0.0247403	0.0279419	-0.175568
468	P62910	RPL32 60S ribosomal protein L32	RPL32	K.ELEVLLMC*NK.S	0.99	0.9	0.9	0.933962	0.873786	0.849057	3	0.885602	0.0436686	0.0493095	-0.17527
407	P62879	GNB2 Guanine nucleotide-binding protein G(I)/G(S)/G(T)	GNB2	R.ELPGHTGYLSC*CR.F		0.98	0.87		0.951456	0.820755	2	0.886106	0.09242	0.104299	-0.17445
385	P30042	C21orf33 ES1 protein homolog, mitochondrial	C21orf33	K.NLSTFAVDGKDC*K.V	0.97	0.96	0.86	0.915094	0.932039	0.811321	3	0.886151	0.0653566	0.0737533	-0.174375
364	Q15054	POLD3 DNA polymerase delta subunit 3	POLD3	K.FSAIQC*AAAVPR.A		1	0.85		0.970874	0.801887	2	0.88638	0.119492	0.134809	-0.174002
538	Q15233	NONO Non-POU domain-containing octamer-binding protein	NONO	R.C*SEGSFLLTTFPRPVTVEPMDQLDDEEGLPEK.L	0.95		0.93	0.896226		0.877358	2	0.886792	0.0133416	0.0150448	-0.173332
293	O95299	NDUFA10 NADH dehydrogenase [ubiquinone] 1 alpha subcomplex	NDUFA10	R.KQC*VDHYNEVK.S	0.95	1.04	0.8	0.896226	1.00971	0.754717	3	0.886884	0.127752	0.144046	-0.173183
741	P30050	RPL12 60S ribosomal protein L12	RPL12	K.EILGTAQSVGC*NVDGR.H		0.81	1.05		0.786408	0.990566	2	0.888487	0.144362	0.16248	-0.170578
569	Q00839	HNRNPU Heterogeneous nuclear ribonucleoprotein U	HNRNPU	K.GPEEKKDC*EVVMMIGLPGAGK.T		0.91	0.95		0.883495	0.896226	2	0.889861	0.00900237	0.0101166	-0.168348
512	O60701	UGDH UDP-glucose 6-dehydrogenase	UGDH	R.ISSINSISALC*EATGADVEEVATAIGMDQR.I		0.94	0.92		0.912621	0.867925	2	0.890273	0.0316054	0.0355008	-0.16768
428	O75150	RNF40 E3 ubiquitin-protein ligase BRE1B	RNF40	R.LREIQPC*LAESR.A		0.98	0.88		0.951456	0.830189	2	0.890822	0.0857492	0.0962584	-0.16679
388	P53597	SUCLG1 Succinate--CoA ligase [ADP/GDP-forming] subunit al	SUCLG1	R.LIGPNC*PGVINPGECK.I		1	0.86		0.970874	0.811321	2	0.891097	0.112821	0.126609	-0.166345
551	Q5U5X0	LYRM7 Complex III assembly factor LYRM7	LYRM7	R.KDLLVENVPYC*DAPTQK.Q		0.93	0.94		0.902913	0.886792	2	0.894853	0.0113987	0.0127381	-0.160278
550	Q8TEX9	IPO4 Importin-4	IPO4	R.APAALPALC*DLLASAADPQIR.Q		0.93	0.94		0.902913	0.886792	2	0.894853	0.0113987	0.0127381	-0.160278
514	P07814	EPRS Bifunctional glutamate/proline--tRNA ligase	EPRS	K.SC*QFVAVR.R		0.95	0.92		0.92233	0.867925	2	0.895127	0.0384705	0.0429777	-0.159835
515	Q9NUP9	LIN7C Protein lin-7 homolog C	LIN7C	R.VLQSEFC*NAVR.E		0.95	0.92		0.92233	0.867925	2	0.895127	0.0384705	0.0429777	-0.159835
487	P36578	RPL4 60S ribosomal protein L4	RPL4	R.YAIC*SALAASALPALVMSK.G	0.99	0.92	0.91	0.933962	0.893204	0.858491	3	0.895219	0.0377762	0.0421977	-0.159688
447	P04222	HLA-C HLA class I histocompatibility antigen, Cw-3 alpha	HLA-C	R.MYGC*DVGPDGR.L		0.98	0.89		0.951456	0.839623	2	0.895539	0.0790783	0.0883025	-0.159171
804	P18085	ARF4 ADP-ribosylation factor 4	ARF4	K.NIC*FTVWDVGGQDR.I		0.79	1.09		0.76699	1.0283	2	0.897646	0.184775	0.205844	-0.155781
655	P55769	SNU13 NHP2-like protein 1	SNU13	K.KLLDLVQQSC*NYK.Q	0.94	0.88	1.01	0.886792	0.854369	0.95283	3	0.897997	0.0501778	0.0558775	-0.155217
677	O60664	PLIN3 Perilipin-3	PLIN3	R.DIAQQLQATC*TSLGSSIQGLPTNVK.D		0.86	1.02		0.834951	0.962264	2	0.898608	0.0900237	0.100181	-0.154237
583	Q9UI30	TRMT112 Multifunctional methyltransferase subunit TRM112-l	TRMT112	R.IC*PVEFNPNFVAR.M		0.92	0.96		0.893204	0.90566	2	0.899432	0.00880807	0.00979292	-0.152914
552	P07947	YES1 Tyrosine-protein kinase Yes	YES1	K.YRPENTPEPVSTSVSHYGAEPTTVSPC*PSSSAK.G		0.94	0.94		0.912621	0.886792	2	0.899707	0.0182638	0.0202997	-0.152473
516	O14980	XPO1 Exportin-1	XPO1	R.TSESLC*QNNMVILK.L		0.96	0.92		0.932039	0.867925	2	0.899982	0.0453357	0.050374	-0.152032
473	O14980	XPO1 Exportin-1	XPO1	K.TSSDPTC*VEKEK.V		0.98	0.9		0.951456	0.849057	2	0.900256	0.0724075	0.0804299	-0.151592
408	Q8N5K1	CISD2 CDGSH iron-sulfur domain-containing protein 2	CISD2	K.VVNEINIEDLC*LTK.A		1.01	0.87		0.980583	0.820755	2	0.900669	0.113015	0.125479	-0.150932
327	Q9Y2S7	POLDIP2 Polymerase delta-interacting protein 2	POLDIP2	R.DC*PHISQR.S	1.09	0.92	0.83	1.0283	0.893204	0.783019	3	0.901508	0.122852	0.136274	-0.149587
235	O95833	CLIC3 Chloride intracellular channel protein 3	CLIC3	K.ASEDGESVGHC*PSCQR.L		1.12	0.76		1.08738	0.716981	2	0.90218	0.261911	0.290309	-0.148513
792	Q9NRP4	SDHAF3 Succinate dehydrogenase assembly factor 3, mitocho	SDHAF3	K.AC*FGTFLPEEK.L		0.81	1.08		0.786408	1.01887	2	0.902638	0.164374	0.182104	-0.147781
522	Q9Y678	COPG1 Coatomer subunit gamma-1	COPG1	K.C*SFDVVKR.W	0.69	1.23	0.92	0.650943	1.19417	0.867925	3	0.904348	0.273441	0.302363	-0.145051
571	P30084	ECHS1 Enoyl-CoA hydratase, mitochondrial	ECHS1	K.ALNALC*DGLIDELNQALK.T		0.94	0.95		0.912621	0.896226	2	0.904424	0.011593	0.0128181	-0.144929
553	Q9NYK5	MRPL39 39S ribosomal protein L39, mitochondrial	MRPL39	K.FLTFKDC*DPGEVNK.A		0.95	0.94		0.92233	0.886792	2	0.904561	0.0251289	0.0277802	-0.14471
491	P42695	NCAPD3 Condensin-2 complex subunit D3	NCAPD3	R.NKDTPAC*SR.R		0.98	0.91		0.951456	0.858491	2	0.904973	0.0657367	0.0726394	-0.144053
474	P33992	MCM5 DNA replication licensing factor MCM5	MCM5	K.C*SPIGVYTSGK.G		0.99	0.9		0.961165	0.849057	2	0.905111	0.0792726	0.0875834	-0.143834
409	O96008	TOMM40 Mitochondrial import receptor subunit TOM40 homolo	TOMM40	R.TPGAATASASGAAEDGAC*GCLPNPGTFEECHR.K		1.02	0.87		0.990291	0.820755	2	0.905523	0.11988	0.132388	-0.143177
594	P53618	COPB1 Coatomer subunit beta	COPB1	R.TLHSC*SVR.F	0.94	0.95	0.97	0.886792	0.92233	0.915094	3	0.908072	0.0187807	0.0206819	-0.139121
701	Q96EL3	MRPL53 39S ribosomal protein L53, mitochondrial	MRPL53	R.VQFC*PFEK.N		0.87	1.03		0.84466	0.971698	2	0.908179	0.0898294	0.0989115	-0.138951
517	O43823	AKAP8 A-kinase anchor protein 8	AKAP8	K.ANDGGLAAGAPAMHMASYGPEPC*TDNSDSLIAK.I		0.98	0.92		0.951456	0.867925	2	0.90969	0.0590659	0.0649297	-0.136552
429	P24752	ACAT1 Acetyl-CoA acetyltransferase, mitochondrial	ACAT1	R.QAVLGAGLPISTPC*TTINK.V		1.02	0.88		0.990291	0.830189	2	0.91024	0.11321	0.124373	-0.135681
793	O15042	U2SURP U2 snRNP-associated SURP motif-containing protein	U2SURP	R.ESLC*DSPHQNLSRPLLENK.L		0.83	1.08		0.805825	1.01887	2	0.912347	0.150644	0.165117	-0.132346
656	O75934	BCAS2 Pre-mRNA-splicing factor SPF27	BCAS2	K.NDITAWQEC*VNNSMAQLEHQAVR.I		0.9	1.01		0.873786	0.95283	2	0.913308	0.0558924	0.0611977	-0.130826
94	P62879	GNB2 Guanine nucleotide-binding protein G(I)/G(S)/G(T)	GNB2	R.TFVSGAC*DASIK.L		1.25	0.65		1.21359	0.613208	2	0.9134	0.424536	0.464787	-0.130681
608	P47712	PLA2G4A Cytosolic phospholipase A2	PLA2G4A	R.C*SVSLSNVEAR.R		0.93	0.98		0.902913	0.924528	2	0.91372	0.0152846	0.0167279	-0.130175
533	Q86VP6	CAND1 Cullin-associated NEDD8-dissociated protein 1	CAND1	R.LVEPLRATC*TTK.V		0.98	0.93		0.951456	0.877358	2	0.914407	0.0523951	0.0572995	-0.129091
518	Q8TAE8	GADD45GIP1 Growth arrest and DNA damage-inducible proteins-in	GADD45GIP1	R.EQHIAEC*MAK.M		0.99	0.92		0.961165	0.867925	2	0.914545	0.065931	0.0720916	-0.128874
294	Q14232	EIF2B1 Translation initiation factor eIF-2B subunit alpha	EIF2B1	K.IGTNQMAVC*AK.A		1.11	0.8		1.07767	0.754717	2	0.916193	0.228362	0.249251	-0.126276
724	P31943	HNRNPH1 Heterogeneous nuclear ribonucleoprotein H	HNRNPH1	R.GLPWSC*SADEVQR.F		0.88	1.04		0.854369	0.981132	2	0.917751	0.0896351	0.0976682	-0.123826
1600	O14497	ARID1A AT-rich interactive domain-containing protein 1A	ARID1A	R.KNPVC*R.E	1.02	0.9		0.962264	0.873786		2	0.918025	0.0625632	0.0681498	-0.123394
679	P37108	SRP14 Signal recognition particle 14 kDa protein	SRP14	K.KGTVEGFEPADNKC*LLR.A		0.9	1.02		0.873786	0.962264	2	0.918025	0.0625632	0.0681498	-0.123394
657	Q71RC2	LARP4 La-related protein 4	LARP4	R.ASTASPC*NNNINAATAVALQEPR.K		0.91	1.01		0.883495	0.95283	2	0.918163	0.0490273	0.0533972	-0.123178
554	Q96FX7	TRMT61A tRNA (adenine(58)-N(1))-methyltransferase catalyti	TRMT61A	R.FCSFSPC*IEQVQR.T		0.98	0.94		0.951456	0.886792	2	0.919124	0.0457243	0.0497476	-0.121668
643	P38606	ATP6V1A V-type proton ATPase catalytic subunit A	ATP6V1A	K.WDFTPC*K.N	0.82	1.08	1	0.773585	1.04854	0.943396	3	0.921842	0.138741	0.150504	-0.117409
1586	P17987	TCP1 T-complex protein 1 subunit alpha	TCP1	R.SLHDALC*VVK.R	1.07	0.86		1.00943	0.834951		2	0.922193	0.123378	0.133787	-0.11686
742	Q9BQ70	TCF25 Transcription factor 25	TCF25	R.SGC*ALTDAVAPGNK.G		0.88	1.05		0.854369	0.990566	2	0.922467	0.0963059	0.1044	-0.11643
929	Q9UJX3	ANAPC7 Anaphase-promoting complex subunit 7	ANAPC7	R.EGRLEDVENLGC*R.L	0.92	0.81	1.18	0.867925	0.786408	1.11321	3	0.922513	0.170101	0.184389	-0.116358
680	P61081	UBE2M NEDD8-conjugating enzyme Ubc12	UBE2M	K.LVIC*PDEGFYK.S		0.91	1.02		0.883495	0.962264	2	0.92288	0.0556981	0.0603525	-0.115786
658	P61077	UBE2D3 Ubiquitin-conjugating enzyme E2 D3	UBE2D3	K.VLLSIC*SLLCDPNPDDPLVPEIAR.I		0.92	1.01		0.893204	0.95283	2	0.923017	0.0421622	0.0456786	-0.115571
609	P83436	COG7 Conserved oligomeric Golgi complex subunit 7	COG7	K.YLSDSC*SPR.S		0.95	0.98		0.92233	0.924528	2	0.923429	0.00155437	0.00168325	-0.114927
584	P55060	CSE1L Exportin-2	CSE1L	K.IC*AVGITK.L		0.97	0.96		0.941748	0.90566	2	0.923704	0.0255175	0.0276252	-0.114498
534	P17302	GJA1 Gap junction alpha-1 protein	GJA1	K.SDPYHATSGALSPAKDC*GSQK.Y		1	0.93		0.970874	0.877358	2	0.924116	0.0661253	0.0715552	-0.113854
492	Q06265	EXOSC9 Exosome complex component RRP45	EXOSC9	-.MKETPLSNC*ER.R		1.02	0.91		0.990291	0.858491	2	0.924391	0.0931972	0.10082	-0.113425
784	O14980	XPO1 Exportin-1	XPO1	K.DLLGLC*EQKR.G	0.76	1.08	1.07	0.716981	1.04854	1.00943	3	0.924986	0.181196	0.19589	-0.112496
18	P40938	RFC3 Replication factor C subunit 3	RFC3	R.LILCC*NSTSK.V		1.44	0.48		1.39806	0.45283	2	0.925444	0.668377	0.722223	-0.111782
549	P83731	RPL24 60S ribosomal protein L24	RPL24	-.MKVELC*SFSGYK.I	1.06	0.92	0.94	1	0.893204	0.886792	3	0.926665	0.0635904	0.0686229	-0.10988
475	P35250	RFC2 Replication factor C subunit 2	RFC2	R.FALAC*NASDK.I	1	1.02	0.9	0.943396	0.990291	0.849057	3	0.927581	0.0719332	0.0775492	-0.108454
430	P83731	RPL24 60S ribosomal protein L24	RPL24	K.C*ESAFLSK.R	1	1.04	0.88	0.943396	1.00971	0.830189	3	0.927765	0.0907751	0.0978429	-0.108169
659	O43747	AP1G1 AP-1 complex subunit gamma-1	AP1G1	R.EMIQKEC*AAIR.S		0.93	1.01		0.902913	0.95283	2	0.927871	0.0352971	0.0380409	-0.108003
640	Q7L0Y3	TRMT10C Mitochondrial ribonuclease P protein 1	TRMT10C	K.SSVQEEC*VSTISSSKDEDPLAATR.E		0.94	1		0.912621	0.943396	2	0.928009	0.0217611	0.0234493	-0.10779
610	Q9BUH6	C9orf142 Protein PAXX	C9orf142	R.C*PGESLINPGFK.S		0.96	0.98		0.932039	0.924528	2	0.928284	0.00531075	0.00572104	-0.107363
431	Q9NVN8	GNL3L Guanine nucleotide-binding protein-like 3-like pro	GNL3L	R.AC*SVGAVPGITK.F		1.06	0.88		1.02913	0.830189	2	0.929657	0.14067	0.151314	-0.105229
570	P45880	VDAC2 Voltage-dependent anion-selective channel protein	VDAC2	R.PMC*IPPSYADLGK.A	1.06	0.92	0.95	1	0.893204	0.896226	3	0.92981	0.060805	0.0653951	-0.104992
470	Q96QK1	VPS35 Vacuolar protein sorting-associated protein 35	VPS35	K.C*FSEENHEPLR.T	1.11	0.92	0.9	1.04717	0.893204	0.849057	3	0.92981	0.104006	0.111857	-0.104992
519	P62280	RPS11 40S ribosomal protein S11	RPS11	K.C*PFTGNVSIR.G	1.01	1	0.92	0.95283	0.970874	0.867925	3	0.930543	0.0549744	0.0590777	-0.103856
743	Q86VP6	CAND1 Cullin-associated NEDD8-dissociated protein 1	CAND1	R.LSTLC*PSAVLQR.L		0.9	1.05		0.873786	0.990566	2	0.932176	0.0825757	0.0885838	-0.101325
991	P42704	LRPPRC Leucine-rich PPR motif-containing protein, mitocho	LRPPRC	R.IHDVLC*K.L	0.74	0.98	1.22	0.698113	0.951456	1.15094	3	0.933504	0.226948	0.243114	-0.0992714
555	O60313	OPA1 Dynamin-like 120 kDa protein, mitochondrial	OPA1	R.TQEQC*VHNETK.N		1.01	0.94		0.980583	0.886792	2	0.933687	0.0663196	0.0710298	-0.0989883
642	O00622	CYR61 Protein CYR61	CYR61	R.AQSEGRPC*EYNSR.I	0.92	1.02	1	0.867925	0.990291	0.943396	3	0.933871	0.061737	0.0661087	-0.0987053
614	O00571	DDX3X ATP-dependent RNA helicase DDX3X	DDX3X	K.IGLDFC*K.Y	0.92	1.04	0.98	0.867925	1.00971	0.924528	3	0.934054	0.0713705	0.0764094	-0.0984224
1020	P00558	PGK1 Phosphoglycerate kinase 1	PGK1	R.GCITIIGGGDTATC*CAK.W		0.72	1.24		0.699029	1.16981	2	0.93442	0.332893	0.356257	-0.0978566
1001	P46013	MKI67 Proliferation marker protein Ki-67	MKI67	R.KADVEGELLAC*R.N		0.73	1.23		0.708738	1.16038	2	0.934558	0.319357	0.34172	-0.0976445
764	P49368	CCT3 T-complex protein 1 subunit gamma	CCT3	R.NLQDAMQVC*R.N		0.9	1.06		0.873786	1	2	0.936893	0.0892465	0.0952579	-0.0940435
641	P14923	JUP Junction plakoglobin	JUP	R.VREAMC*PGVSGEDSSLLLATQVEGQATNLQR.L		0.96	1		0.932039	0.943396	2	0.937718	0.00803089	0.00856429	-0.0927747
520	P63010	AP2B1 AP-2 complex subunit beta	AP2B1	K.C*LKDEDPYVR.K		1.04	0.92		1.00971	0.867925	2	0.938817	0.100257	0.10679	-0.0910847
410	Q96EY8	MMAB Cob(I)yrinic acid a,c-diamide adenosyltransferase,	MMAB	K.IQCTLQDVGSALATPC*SSAR.E		1.09	0.87		1.05825	0.820755	2	0.939504	0.167936	0.17875	-0.0900294
767	P62910	RPL32 60S ribosomal protein L32	RPL32	K.SYC*AEIAHNVSSK.N	0.94	0.96	1.06	0.886792	0.932039	1	3	0.93961	0.0569823	0.0606446	-0.0898654
1675	P62913	RPL11 60S ribosomal protein L11	RPL11	K.IAVHC*TVR.G	0.84	1.12		0.792453	1.08738		2	0.939916	0.208544	0.221875	-0.0893967
263	Q92616	GCN1 eIF-2-alpha kinase activator GCN1	GCN1	K.C*VAGKDLPEGAVK.G		1.18	0.78		1.14563	0.735849	2	0.94074	0.28976	0.308012	-0.088132
870	P55060	CSE1L Exportin-2	CSE1L	K.LLTEC*PPMMDTEYTK.L		0.84	1.13		0.815534	1.06604	2	0.940786	0.177133	0.188282	-0.0880617
744	P17676	CEBPB CCAAT/enhancer-binding protein beta	CEBPB	K.APPTAC*YAGAAPAPSQVK.S		0.92	1.05		0.893204	0.990566	2	0.941885	0.0688454	0.0730933	-0.0863772
725	Q8N6H7	ARFGAP2 ADP-ribosylation factor GTPase-activating protein	ARFGAP2	R.QHGC*TANDANTK.Y		0.93	1.04		0.902913	0.981132	2	0.942022	0.0553095	0.0587136	-0.0861668
612	Q5VZ89	DENND4C DENN domain-containing protein 4C	DENND4C	R.C*ANVNNSSTTSQR.I		0.99	0.98		0.961165	0.924528	2	0.942847	0.0259061	0.0274765	-0.0849049
595	Q15005	SPCS2 Signal peptidase complex subunit 2	SPCS2	R.SGGSGGC*SGAGGASNC*GTGSGR.S	1	1	0.97	0.943396	0.970874	0.915094	3	0.943121	0.0278907	0.0295728	-0.0844845
585	P52948	NUP98 Nuclear pore complex protein Nup98-Nup96	NUP98	R.HIQQVDC*SGNDLEQLHIK.V		1.01	0.96		0.980583	0.90566	2	0.943121	0.052978	0.056173	-0.0844845
572	Q9BPW8	NIPSNAP1 Protein NipSnap homolog 1	NIPSNAP1	R.FSGGYPALMDC*MNK.L		1.02	0.95		0.990291	0.896226	2	0.943259	0.0665139	0.070515	-0.0842744
645	Q92616	GCN1 eIF-2-alpha kinase activator GCN1	GCN1	R.KALC*DPLEEVR.E	0.87	1.1	1	0.820755	1.06796	0.943396	3	0.944037	0.123604	0.130932	-0.0830841
786	P22102	GART Trifunctional purine biosynthetic protein adenosin	GART	R.SAGVQC*FGPTAEAAQLESSKR.F	0.73	1.17	1.07	0.688679	1.13592	1.00943	3	0.944679	0.230546	0.244047	-0.0821047
295	Q96GM8	TOE1 Target of EGR1 protein 1	TOE1	K.SLLNQC*IEER.Y		1.17	0.8		1.13592	0.754717	2	0.94532	0.269553	0.285145	-0.0811258
850	Q15021	NCAPD2 Condensin complex subunit 1	NCAPD2	R.EIGQKC*PQELSR.D		0.86	1.12		0.834951	1.0566	2	0.945778	0.156732	0.165717	-0.0804271
1589	Q15149	PLEC Plectin	PLEC	R.SEFERLEC*LQR.I	1.11	0.87		1.04717	0.84466		2	0.945915	0.143196	0.151383	-0.0802175
820	P08865	RPSA 40S ribosomal protein SA	RPSA	R.YVDIAIPC*NNK.G		0.88	1.1		0.854369	1.03774	2	0.946052	0.12966	0.137054	-0.080008
765	Q9NVT9	ARMC1 Armadillo repeat-containing protein 1	ARMC1	R.YLAEC*R.A		0.92	1.06		0.893204	1	2	0.946602	0.0755163	0.0797761	-0.0791702
682	O00410	IPO5 Importin-5	IPO5	R.MAC*GLGGK.L		0.96	1.02		0.932039	0.962264	2	0.947151	0.0213725	0.0225651	-0.0783329
625	P18621	RPL17 60S ribosomal protein L17	RPL17	R.YSLDPENPTKSC*K.S		0.99	0.99		0.961165	0.933962	2	0.947564	0.0192353	0.0202997	-0.0777052
557	P41091	EIF2S3 Eukaryotic translation initiation factor 2 subunit	EIF2S3	R.SFDVNKPGC*EVDDLKGGVAGGSILK.G		1.04	0.94		1.00971	0.886792	2	0.948251	0.0869149	0.0916582	-0.0766597
535	O15460	P4HA2 Prolyl 4-hydroxylase subunit alpha-2	P4HA2	R.GQEFLRPC*GSTEVD.-		1.05	0.93		1.01942	0.877358	2	0.948388	0.100451	0.105917	-0.0764507
448	Q96QK1	VPS35 Vacuolar protein sorting-associated protein 35	VPS35	R.TQC*ALAASK.L		1.09	0.89		1.05825	0.839623	2	0.948938	0.154595	0.162913	-0.075615
1607	P67870	CSNK2B Casein kinase II subunit beta	CSNK2B	K.YQQGDFGYC*PR.V	1.07	0.92		1.00943	0.893204		2	0.951319	0.0821871	0.0863928	-0.071999
766	Q12830	BPTF Nucleosome-remodeling factor subunit BPTF	BPTF	K.AVQMC*SKPR.E		0.93	1.06		0.902913	1	2	0.951456	0.0686511	0.0721538	-0.0717907
626	O14929	HAT1 Histone acetyltransferase type B catalytic subunit	HAT1	K.C*NTNTAIELK.L		1	0.99		0.970874	0.933962	2	0.952418	0.0261004	0.0274043	-0.0703332
735	Q15645	TRIP13 Pachytene checkpoint protein 2 homolog	TRIP13	K.IYLSC*LEELMK.C	0.98		1.04	0.924528		0.981132	2	0.95283	0.0400249	0.0420063	-0.069709
352	P38646	HSPA9 Stress-70 protein, mitochondrial	HSPA9	K.AKC*ELSSSVQTDINLPYLTMDSSGPK.H		1.15	0.84		1.1165	0.792453	2	0.954479	0.229139	0.240068	-0.0672149
304	P31930	UQCRC1 Cytochrome b-c1 complex subunit 1, mitochondrial	UQCRC1	R.NALVSHLDGTTPVC*EDIGR.S		1.18	0.81		1.14563	0.764151	2	0.954891	0.269747	0.28249	-0.066592
660	P50914	RPL14 60S ribosomal protein L14	RPL14	K.C*MQLTDFILK.F	0.96	1.04	1.01	0.90566	1.00971	0.95283	3	0.956066	0.0520996	0.0544937	-0.0648172
676	P53618	COPB1 Coatomer subunit beta	COPB1	K.KPITDDDVDRISLC*LK.V	1.17	0.83	1.02	1.10377	0.805825	0.962264	3	0.957288	0.149036	0.155686	-0.0629756
586	P37198	NUP62 Nuclear pore glycoprotein p62	NUP62	K.VEEVTKVC*EGR.R		1.04	0.96		1.00971	0.90566	2	0.957685	0.0735733	0.0768241	-0.0623776
781	Q7Z4W1	DCXR L-xylulose reductase	DCXR	R.GVPGAIVNVSSQC*SQR.A		0.94	1.07		0.912621	1.00943	2	0.961028	0.0684568	0.071233	-0.0573501
152	Q9BQG0	MYBBP1A Myb-binding protein 1A	MYBBP1A	R.HYGEHVC*TAK.L		1.3	0.7		1.26214	0.660377	2	0.961257	0.425508	0.442658	-0.0570064
703	P40227	CCT6A T-complex protein 1 subunit zeta	CCT6A	K.NAIDDGC*VVPGAGAVEVAMAEALIK.H		0.98	1.03		0.951456	0.971698	2	0.961577	0.0143131	0.014885	-0.0565254
702	Q9Y5L0	TNPO3 Transportin-3	TNPO3	K.GLC*EKPLASAAAK.A		0.98	1.03		0.951456	0.971698	2	0.961577	0.0143131	0.014885	-0.0565254
683	Q92616	GCN1 eIF-2-alpha kinase activator GCN1	GCN1	K.C*LQNPSSDIR.L		0.99	1.02		0.961165	0.962264	2	0.961715	0.000777183	0.000808122	-0.0563193
807	P51114	FXR1 Fragile X mental retardation syndrome-related prot	FXR1	K.KAVGAC*R.I	0.89	1.05	1.09	0.839623	1.01942	1.0283	3	0.962447	0.106462	0.110616	-0.0552205
521	P33240	CSTF2 Cleavage stimulation factor subunit 2	CSTF2	K.LC*VQNSPQEAR.N		1.09	0.92		1.05825	0.867925	2	0.963088	0.134582	0.13974	-0.0542598
733	P61221	ABCE1 ATP-binding cassette sub-family E member 1	ABCE1	K.ETTHRYC*ANAFK.L	0.73	1.26	1.04	0.688679	1.2233	0.981132	3	0.964371	0.267705	0.277595	-0.0523402
316	O75369	FLNB Filamin-B	FLNB	K.SPFVVQVGEACNPNAC*R.A		1.19	0.82		1.15534	0.773585	2	0.964462	0.269941	0.279888	-0.0522032
889	Q9NZL4	HSPBP1 Hsp70-binding protein 1	HSPBP1	R.LLDRDAC*DTVR.V		0.87	1.15		0.84466	1.08491	2	0.964783	0.169879	0.17608	-0.0517237
851	P52272	HNRNPM Heterogeneous nuclear ribonucleoprotein M	HNRNPM	K.DKFNEC*GHVLYADIK.M	0.92	1	1.12	0.867925	0.970874	1.0566	3	0.965134	0.0944705	0.0978833	-0.0511988
768	P08754	GNAI3 Guanine nucleotide-binding protein G(k) subunit al	GNAI3	K.NNLKEC*GLY.-		0.96	1.06		0.932039	1	2	0.966019	0.0480558	0.0497462	-0.0498759
769	Q09666	AHNAK Neuroblast differentiation-associated protein AHNA	AHNAK	R.LGSPSGKTGTC*R.I		0.96	1.06		0.932039	1	2	0.966019	0.0480558	0.0497462	-0.0498759
745	Q9NTJ3	SMC4 Structural maintenance of chromosomes protein 4	SMC4	R.FSC*IIGPNGSGK.S		0.97	1.05		0.941748	0.990566	2	0.966157	0.0345199	0.0357291	-0.0496707
746	Q9Y3D2	MSRB2 Methionine-R-sulfoxide reductase B2, mitochondrial	MSRB2	R.GQAGGGGPGTGPGLGEAGSLATC*ELPLAK.S		0.97	1.05		0.941748	0.990566	2	0.966157	0.0345199	0.0357291	-0.0496707
684	O43707	ACTN4 Alpha-actinin-4	ACTN4	K.C*QLEINFNTLQTK.L		1	1.02		0.970874	0.962264	2	0.966569	0.00608793	0.0062985	-0.0490554
627	Q5RKV6	EXOSC6 Exosome complex component MTR3	EXOSC6	R.RAPPGGC*EER.E		1.03	0.99		1	0.933962	2	0.966981	0.0466957	0.0482902	-0.0484404
611	P46776	RPL27A 60S ribosomal protein L27a	RPL27A	K.RNQSFC*PTVNLDK.L	1.09	0.98	0.98	1.0283	0.951456	0.924528	3	0.968095	0.0538506	0.0556253	-0.0467787
913	Q00610	CLTC Clathrin heavy chain 1	CLTC	K.VIQC*FAETGQVQK.I		0.86	1.17		0.834951	1.10377	2	0.969363	0.190086	0.196094	-0.0448918
178	O00622	CYR61 Protein CYR61	CYR61	K.GLEC*NFGASSTALK.G		1.3	0.72		1.26214	0.679245	2	0.970691	0.412166	0.424611	-0.0429166
1234	Q9UPQ0	LIMCH1 LIM and calponin homology domains-containing prote	LIMCH1	R.C*EEEAAVQPHSR.A		0.62	1.42		0.601942	1.33962	2	0.970782	0.521619	0.537318	-0.0427804
406	P09543	CNP 2,3-cyclic-nucleotide 3-phosphodiesterase	CNP	K.DKPELQFPFLQDEDTVATLLEC*K.T	1.21	0.98	0.87	1.14151	0.951456	0.820755	3	0.97124	0.16129	0.166066	-0.0421
704	P63010	AP2B1 AP-2 complex subunit beta	AP2B1	K.ITEYLC*EPLRK.C		1	1.03		0.970874	0.971698	2	0.971286	0.000582887	0.000600119	-0.042032
705	Q01082	SPTBN1 Spectrin beta chain, non-erythrocytic 1	SPTBN1	K.FATDGEGYKPC*DPQVIR.D		1	1.03		0.970874	0.971698	2	0.971286	0.000582887	0.000600119	-0.042032
686	Q02543	RPL18A 60S ribosomal protein L18a	RPL18A	K.VEEIAASKC*R.R		1.01	1.02		0.980583	0.962264	2	0.971423	0.012953	0.0133341	-0.0418279
685	Q9Y5P6	GMPPB Mannose-1-phosphate guanyltransferase beta	GMPPB	R.LC*SGPGIVGNVLVDPSAR.I		1.01	1.02		0.980583	0.962264	2	0.971423	0.012953	0.0133341	-0.0418279
890	Q92841	DDX17 Probable ATP-dependent RNA helicase DDX17	DDX17	R.TTSSANNPNLMYQDEC*DR.R		0.89	1.15		0.864078	1.08491	2	0.974492	0.156149	0.160236	-0.0372782
748	Q96DI7	SNRNP40 U5 small nuclear ribonucleoprotein 40 kDa protein	SNRNP40	R.RGPQLVC*TGSDDGTVK.L		0.99	1.05		0.961165	0.990566	2	0.975866	0.0207896	0.0213038	-0.0352457
687	O00571	DDX3X ATP-dependent RNA helicase DDX3X	DDX3X	K.RDLMAC*AQTGSGK.T		1.02	1.02		0.990291	0.962264	2	0.976278	0.0198182	0.0202997	-0.0346365
465	Q08AG7	MZT1 Mitotic-spindle organizing protein 1	MZT1	R.LC*EQGINPEALSSVIK.E	1.33	0.85	0.9	1.25472	0.825243	0.849057	3	0.976339	0.241376	0.247226	-0.0345463
914	P17987	TCP1 T-complex protein 1 subunit alpha	TCP1	R.IC*DDELILIK.N	1.03	0.88	1.17	0.971698	0.854369	1.10377	3	0.976614	0.124775	0.127763	-0.0341403
616	Q6WCQ1	MPRIP Myosin phosphatase Rho-interacting protein	MPRIP	K.AKADC*DISR.L		1.06	0.98		1.02913	0.924528	2	0.976827	0.0739619	0.0757165	-0.0338246
822	P46776	RPL27A 60S ribosomal protein L27a	RPL27A	K.IKSVGGAC*VLVA.-	0.98	1	1.1	0.924528	0.970874	1.03774	3	0.977713	0.0569128	0.0582101	-0.0325176
872	P23396	RPS3 40S ribosomal protein S3	RPS3	R.AC*YGVLR.F	0.86	1.09	1.13	0.811321	1.05825	1.06604	3	0.978537	0.144866	0.148043	-0.0313017
940	P27797	CALR Calreticulin	CALR	K.HEQNIDC*GGGYVK.L		0.86	1.19		0.834951	1.12264	2	0.978796	0.203428	0.207834	-0.0309192
891	P30050	RPL12 60S ribosomal protein L12	RPL12	R.C*TGGEVGATSALAPK.I		0.9	1.15		0.873786	1.08491	2	0.979346	0.149284	0.152432	-0.0301094
728	P21333	FLNA Filamin-A	FLNA	K.DNGNGTYSC*SYVPR.K		1.01	1.04		0.980583	0.981132	2	0.980857	0.000388591	0.000396175	-0.0278848
729	P78347	GTF2I General transcription factor II-I	GTF2I	R.SILSPGGSC*GPIK.V		1.01	1.04		0.980583	0.981132	2	0.980857	0.000388591	0.000396175	-0.0278848
1655	P32969	RPL9 60S ribosomal protein L9	RPL9	R.TIC*SHVQNMIK.G	0.99	1.06		0.933962	1.02913		2	0.981544	0.0672911	0.0685563	-0.0268748
785	P46782	RPS5 40S ribosomal protein S5	RPS5	K.TIAEC*LADELINAAK.G	0.94	1.08	1.07	0.886792	1.04854	1.00943	3	0.98159	0.0843939	0.0859767	-0.0268075
880	P62424	RPL7A 60S ribosomal protein L7a	RPL7A	K.TC*TTVAFTQVNSEDKGALAK.L	0.99	0.97	1.14	0.933962	0.941748	1.07547	3	0.983727	0.0795484	0.0808643	-0.0236698
142	P49790	NUP153 Nuclear pore complex protein Nup153	NUP153	K.CVACETPKPGTC*VK.R		1.36	0.69		1.32039	0.650943	2	0.985666	0.473369	0.480253	-0.0208294
689	P30044	PRDX5 Peroxiredoxin-5, mitochondrial	PRDX5	K.ALNVEPDGTGLTC*SLAPNIISQL.-		1.04	1.02		1.00971	0.962264	2	0.985986	0.0335484	0.0340252	-0.0203603
661	Q9P2R3	ANKFY1 Rabankyrin-5	ANKFY1	R.C*ALLAAQANK.E		1.05	1.01		1.01942	0.95283	2	0.986124	0.0470843	0.0477469	-0.0201593
536	P62241	RPS8 40S ribosomal protein S8	RPS8	R.LDVGNFSWGSEC*CTR.K		1.13	0.93		1.09709	0.877358	2	0.987223	0.155372	0.157383	-0.0185522
587	P22090	RPS4Y1 40S ribosomal protein S4, Y isoform 1	RPS4Y1	K.YALTGDEVKKIC*MQR.F	1.1	1.05	0.96	1.03774	1.01942	0.90566	3	0.987605	0.0715544	0.0724525	-0.0179946
1105	Q13547	HDAC1 Histone deacetylase 1	HDAC1	R.ISIC*SSDKR.I	0.7	1.11	1.3	0.660377	1.07767	1.22642	3	0.988154	0.293444	0.296962	-0.017192
968	Q9UQ35	SRRM2 Serine/arginine repetitive matrix protein 2	SRRM2	R.SVSPC*SNVESR.L		0.86	1.21		0.834951	1.14151	2	0.98823	0.216769	0.219351	-0.0170806
805	Q53H96	PYCR3 Pyrroline-5-carboxylate reductase 3	PYCR3	R.SDVC*TPGGTTIYGLHALEQGGLR.A		0.98	1.09		0.951456	1.0283	2	0.989879	0.054338	0.0548936	-0.0146758
1126	Q8TD19	NEK9 Serine/threonine-protein kinase Nek9	NEK9	R.LNPAVTC*AGK.G		0.76	1.32		0.737864	1.24528	2	0.991574	0.358799	0.361848	-0.0122083
915	Q99497	PARK7 Protein/nucleic acid deglycase DJ-1	PARK7	K.VTVAGLAGKDPVQC*SR.D		0.91	1.17		0.883495	1.10377	2	0.993634	0.15576	0.156758	-0.00921302
835	P48643	CCT5 T-complex protein 1 subunit epsilon	CCT5	K.ETGANLAIC*QWGFDDEANHLLLQNNLPAVR.W		0.97	1.11		0.941748	1.04717	2	0.994459	0.0745448	0.0749602	-0.00801665
690	O94925	GLS Glutaminase kidney isoform, mitochondrial	GLS	K.FSPDLWGVSVC*TVDGQR.H		1.06	1.02		1.02913	0.962264	2	0.995695	0.0472786	0.047483	-0.00622395
691	Q9UJX2	CDC23 Cell division cycle protein 23 homolog	CDC23	K.LHEQLTESEQAAQC*YIK.Y		1.06	1.02		1.02913	0.962264	2	0.995695	0.0472786	0.047483	-0.00622395
588	P07858	CTSB Cathepsin B	CTSB	K.IC*EPGYSPTYK.Q		1.12	0.96		1.08738	0.90566	2	0.99652	0.128494	0.128943	-0.00503005
613	P18621	RPL17 60S ribosomal protein L17	RPL17	R.INPYMSSPC*HIEMILTEK.E	1.16	1.01	0.98	1.09434	0.980583	0.924528	3	0.999817	0.0865242	0.0865401	-0.000264302
1225	Q86WR0	CCDC25 Coiled-coil domain-containing protein 25	CCDC25	K.ANSIQGC*K.M		0.69	1.41		0.669903	1.33019	2	1.00005	0.466893	0.466871	6.60681e-05
644	P61978	HNRNPK Heterogeneous nuclear ribonucleoprotein K	HNRNPK	K.LFQEC*CPHSTDR.V		1.09	1		1.05825	0.943396	2	1.00082	0.0812156	0.0811487	0.00118876
573	Q14432	PDE3A cGMP-inhibited 3,5-cyclic phosphodiesterase A	PDE3A	R.TSLPC*IPR.E		1.14	0.95		1.1068	0.896226	2	1.00151	0.148895	0.148671	0.00217865
1101	P08237	PFKM ATP-dependent 6-phosphofructokinase, muscle type	PFKM	R.LPLMEC*VQVTK.D		0.8	1.3		0.776699	1.22642	2	1.00156	0.317997	0.317503	0.00224462
559	Q92616	GCN1 eIF-2-alpha kinase activator GCN1	GCN1	K.QLSSC*LPNIVPK.L		1.15	0.94		1.1165	0.886792	2	1.00165	0.162431	0.162164	0.00237655
560	Q9Y285	FARSA Phenylalanine--tRNA ligase alpha subunit	FARSA	K.VNLQMVYDSPLC*R.L		1.15	0.94		1.1165	0.886792	2	1.00165	0.162431	0.162164	0.00237655
706	P68104	EEF1A1 Elongation factor 1-alpha 1	EEF1A1	K.PMC*VESFSDYPPLGR.F	1.1	1.03	1.03	1.03774	1	0.971698	3	1.00314	0.033131	0.0330271	0.00452966
597	O75845	SC5D Lathosterol oxidase	SC5D	R.SSHSGNGC*KNEK.L	1.16	1.03	0.97	1.09434	1	0.915094	3	1.00314	0.089664	0.0893829	0.00452966
931	Q16637	SMN1 Survival motor neuron protein	SMN1	K.HALKNGDIC*ETSGKPK.T		0.92	1.18		0.893204	1.11321	2	1.00321	0.155566	0.155069	0.00461747
930	Q9NX70	MED29 Mediator of RNA polymerase II transcription subuni	MED29	K.DIHTALLDC*ANK.V		0.92	1.18		0.893204	1.11321	2	1.00321	0.155566	0.155069	0.00461747
824	P31689	DNAJA1 DnaJ homolog subfamily A member 1	DNAJA1	K.GAVEC*CPNCR.G	0.97	1.09	1.1	0.915094	1.05825	1.03774	3	1.00369	0.0774124	0.0771275	0.00531979
856	Q01813	PFKP ATP-dependent 6-phosphofructokinase, platelet type	PFKP	R.LPLMEC*VQMTQDVQK.A	0.95	1.09	1.12	0.896226	1.05825	1.0566	3	1.00369	0.0930735	0.0927309	0.00531979
839	Q9UKX7	NUP50 Nuclear pore complex protein Nup50	NUP50	K.AC*VGNAYHK.Q	0.92	1.13	1.11	0.867925	1.09709	1.04717	3	1.00406	0.12051	0.120023	0.00584631
836	Q9H479	FN3K Fructosamine-3-kinase	FN3K	R.AFGGPGAGC*ISEGR.A		0.99	1.11		0.961165	1.04717	2	1.00417	0.0608146	0.0605622	0.00599984
823	P08238	HSP90AB1 Heat shock protein HSP 90-beta	HSP90AB1	K.RGFEVVYMTEPIDEYC*VQQLK.E		1	1.1		0.970874	1.03774	2	1.0043	0.0472786	0.047076	0.00619721
933	P51610	HCFC1 Host cell factor 1	HCFC1	R.VAGINAC*GR.G	0.81	1.17	1.18	0.764151	1.13592	1.11321	3	1.00443	0.208395	0.207476	0.00637263
783	P62826	RAN GTP-binding nuclear protein Ran	RAN	R.VC*ENIPIVLCGNK.V		1.03	1.07		1	1.00943	2	1.00472	0.00667082	0.0066395	0.00678917
770	Q9UNE7	STUB1 E3 ubiquitin-protein ligase CHIP	STUB1	R.KYPEAAAC*YGR.A		1.04	1.06		1.00971	1	2	1.00485	0.00686511	0.00683195	0.00698643
749	P51153	RAB13 Ras-related protein Rab-13	RAB13	R.SGNGNKPPSTDLKTC*DKK.N		1.05	1.05		1.01942	0.990566	2	1.00499	0.020401	0.0202997	0.00718367
1047	Q96P16	RPRD1A Regulation of nuclear pre-mRNA domain-containing p	RPRD1A	K.HVSSETDESC*KK.H	0.98	0.93	1.26	0.924528	0.902913	1.18868	3	1.00537	0.159115	0.158265	0.00773141
747	P31943	HNRNPH1 Heterogeneous nuclear ribonucleoprotein H	HNRNPH1	R.DLNYC*FSGMSDHR.Y	1.14	0.98	1.05	1.07547	0.951456	0.990566	3	1.00583	0.0634013	0.0630337	0.00838842
618	Q9NP73	ALG13 Putative bifunctional UDP-N-acetylglucosamine tran	ALG13	K.ADLVISHAGAGSC*LETLEK.G		1.12	0.98		1.08738	0.924528	2	1.00595	0.115153	0.114471	0.00856358
589	O43290	SART1 U4/U6.U5 tri-snRNP-associated protein 1	SART1	R.GLAAALLLC*QNK.G		1.14	0.96		1.1068	0.90566	2	1.00623	0.142224	0.141344	0.00895759
590	P35611	ADD1 Alpha-adducin	ADD1	K.YSDVEVPASVTGYSFASDGDSGTC*SPLR.H		1.14	0.96		1.1068	0.90566	2	1.00623	0.142224	0.141344	0.00895759
1569	O15020	SPTBN2 Spectrin beta chain, non-erythrocytic 2	SPTBN2	R.IHC*LENVDK.A	1.3	0.81		1.22642	0.786408		2	1.00641	0.311132	0.30915	0.00922021
892	P09382	LGALS1 Galectin-1	LGALS1	K.IKC*VAFD.-	1.11	0.92	1.15	1.04717	0.893204	1.08491	3	1.00843	0.101554	0.100705	0.0121059
881	P11717	IGF2R Cation-independent mannose-6-phosphate receptor	IGF2R	K.VVSSC*QEK.R		0.97	1.14		0.941748	1.07547	2	1.00861	0.0945572	0.0937501	0.0123679
794	Q96I24	FUBP3 Far upstream element-binding protein 3	FUBP3	R.SSGC*FPNMAAK.V		1.03	1.08		1	1.01887	2	1.00943	0.0133416	0.0132169	0.0135465
708	P62280	RPS11 40S ribosomal protein S11	RPS11	R.DVQIGDIVTVGEC*RPLSK.T	1.07	1.09	1.03	1.00943	1.05825	0.971698	3	1.01313	0.0433952	0.0428329	0.0188167
1637	P54278	PMS2 Mismatch repair endonuclease PMS2	PMS2	R.FKKEEILSSSDIC*QK.L	1.1	1.02		1.03774	0.990291		2	1.01401	0.0335484	0.0330848	0.0200769
806	Q9BSD7	NTPCR Cancer-related nucleoside-triphosphatase	NTPCR	R.NADC*SSGPGQR.V		1.03	1.09		1	1.0283	2	1.01415	0.0200125	0.0197332	0.0202724
668	O00592	PODXL Podocalyxin	PODXL	K.ATFNPAQDKC*GIR.L	1.14		1.01	1.07547		0.95283	2	1.01415	0.0867206	0.0855106	0.0202724
795	P29372	MPG DNA-3-methyladenine glycosylase	MPG	R.AGQPHSSSDAAQAPAEQPHSSSDAAQAPC*PR.E		1.04	1.08		1.00971	1.01887	2	1.01429	0.00647652	0.00638529	0.0204678
1235	Q16666	IFI16 Gamma-interferon-inducible protein 16	IFI16	K.INQLC*SQTK.G		0.71	1.42		0.68932	1.33962	2	1.01447	0.459833	0.453274	0.0207284
750	P31040	SDHA Succinate dehydrogenase [ubiquinone] flavoprotein	SDHA	R.AAFGLSEAGFNTAC*VTK.L		1.07	1.05		1.03883	0.990566	2	1.0147	0.0341313	0.0336368	0.021054
662	Q04637	EIF4G1 Eukaryotic translation initiation factor 4 gamma 1	EIF4G1	K.AISEPNFSVAYANMC*R.C		1.11	1.01		1.07767	0.95283	2	1.01525	0.088275	0.086949	0.0218351
476	P18621	RPL17 60S ribosomal protein L17	RPL17	R.YNGGVGRC*AQAK.Q	1.28	1.02	0.9	1.20755	0.990291	0.849057	3	1.01563	0.180584	0.177804	0.0223773
688	O00303	EIF3F Eukaryotic translation initiation factor 3 subunit	EIF3F	K.TC*FSPNR.V	1.15	1.03	1.02	1.08491	1	0.962264	3	1.01572	0.0628144	0.0618421	0.0225074
771	Q99832	CCT7 T-complex protein 1 subunit eta	CCT7	K.EGTDSSQGIPQLVSNISAC*QVIAEAVR.T	1.08	1.06	1.06	1.01887	1.02913	1	3	1.016	0.0147737	0.014541	0.0228976
1003	Q86V48	LUZP1 Leucine zipper protein 1	LUZP1	R.GHVLGNGSQVTQAANSGC*SK.A		0.9	1.23		0.873786	1.16038	2	1.01708	0.20265	0.199247	0.0244358
969	Q99439	CNN2 Calponin-2	CNN2	K.C*ASQVGMTAPGTR.R		0.92	1.21		0.893204	1.14151	2	1.01736	0.175579	0.172583	0.0248255
952	A0A075B759	PPIAL4E Peptidyl-prolyl cis-trans isomerase A-like 4E	PPIAL4E	R.IIPGFMC*QGGDFTR.P		0.93	1.2		0.902913	1.13208	2	1.01749	0.162043	0.159257	0.0250204
916	Q7L5Y9	MAEA Macrophage erythroblast attacher	MAEA	R.QDDKVVC*PR.T		0.96	1.17		0.932039	1.10377	2	1.01791	0.121435	0.119299	0.0256046
871	O00429	DNM1L Dynamin-1-like protein	DNM1L	K.YIETSELC*GGAR.I		1	1.13		0.970874	1.06604	2	1.01846	0.0672911	0.0660717	0.0263833
855	Q9BZE1	MRPL37 39S ribosomal protein L37, mitochondrial	MRPL37	R.NHIENQDEC*VLNVISHAR.L	1.01	1.08	1.12	0.95283	1.04854	1.0566	3	1.01933	0.0577278	0.0566333	0.0276154
663	P16615	ATP2A2 Sarcoplasmic/endoplasmic reticulum calcium ATPase	ATP2A2	R.NYLEPGKEC*VQPATK.S		1.12	1.01		1.08738	0.95283	2	1.0201	0.0951401	0.0932651	0.0287168
411	Q9Y3B4	SF3B6 Splicing factor 3B subunit 6	SF3B6	K.NACDHLSGFNVC*NR.Y	1.14	1.2	0.87	1.07547	1.16505	0.820755	3	1.02042	0.178626	0.17505	0.0291701
236	Q13501	SQSTM1 Sequestosome-1	SQSTM1	R.FSFCC*SPEPEAEAEAAAGPGPCER.L	1.18	1.27	0.76	1.11321	1.23301	0.716981	3	1.02107	0.270072	0.2645	0.0300763
953	P13639	EEF2 Elongation factor 2	EEF2	R.C*LYASVLTAQPR.L		0.94	1.2		0.912621	1.13208	2	1.02235	0.155177	0.151785	0.0318869
710	O00148	DDX39A ATP-dependent RNA helicase DDX39A	DDX39A	K.HFVLDEC*DK.M	1.09	1.1	1.03	1.0283	1.06796	0.971698	3	1.02265	0.0483794	0.0473077	0.0323177
917	Q13308	PTK7 Inactive tyrosine-protein kinase 7	PTK7	R.NC*LVSAQR.Q		0.97	1.17		0.941748	1.10377	2	1.02276	0.11457	0.11202	0.0324685
852	Q9NZB2	FAM120A Constitutive coactivator of PPAR-gamma-like protei	FAM120A	R.VAAASGHC*GAFSGSDSSR.T		1.02	1.12		0.990291	1.0566	2	1.02345	0.04689	0.0458158	0.0334371
730	P16455	MGMT Methylated-DNA--protein-cysteine methyltransferase	MGMT	R.VVC*SSGAVGNYSGGLAVK.E		1.1	1.04		1.06796	0.981132	2	1.02455	0.0613974	0.0599264	0.0349856
707	P54136	RARS Arginine--tRNA ligase, cytoplasmic	RARS	K.NC*GC*LGASPNLEQLQEENLK.L	1.15	1.05	1.03	1.08491	1.01942	0.971698	3	1.02534	0.0568357	0.0554311	0.036103
858	P62851	RPS25 40S ribosomal protein S25	RPS25	K.ATYDKLC*K.E	0.97	1.14	1.12	0.915094	1.1068	1.0566	3	1.02616	0.0994097	0.096875	0.0372624
1062	Q86W42	THOC6 THO complex subunit 6 homolog	THOC6	K.AQVPGSSPGLLSLSLNQQPAAPEC*K.V		0.88	1.27		0.854369	1.19811	2	1.02624	0.243064	0.236849	0.0373697
893	P54646	PRKAA2 5-AMP-activated protein kinase catalytic subunit	PRKAA2	R.TSC*GSPNYAAPEVISGR.L		1	1.15		0.970874	1.08491	2	1.02789	0.0806327	0.0784449	0.0396855
853	Q06210	GFPT1 Glutamine--fructose-6-phosphate aminotransferase [	GFPT1	K.C*QNALQQVVAR.Q		1.03	1.12		1	1.0566	2	1.0283	0.0400249	0.0389233	0.0402639
1022	Q02543	RPL18A 60S ribosomal protein L18a	RPL18A	K.KSSGEIVYC*GQVFEK.S	0.97	1.03	1.24	0.915094	1	1.16981	3	1.0283	0.129696	0.126126	0.0402639
837	P41250	GARS Glycine--tRNA ligase	GARS	K.NGEC*FR.A		1.04	1.11		1.00971	1.04717	2	1.02844	0.026489	0.0257565	0.0404566
954	Q00341	HDLBP Vigilin	HDLBP	K.GAKDC*VEAAK.K		0.96	1.2		0.932039	1.13208	2	1.03206	0.141447	0.137054	0.0455229
751	P49841	GSK3B Glycogen synthase kinase-3 beta	GSK3B	K.LC*DFGSAK.Q		1.11	1.05		1.07767	0.990566	2	1.03412	0.0615917	0.0595597	0.0484008
664	Q9UBF2	COPG2 Coatomer subunit gamma-2	COPG2	R.ELAPAVSVLQLFC*SSPK.P		1.15	1.01		1.1165	0.95283	2	1.03467	0.115735	0.111858	0.0491672
1148	P46782	RPS5 40S ribosomal protein S5	RPS5	R.VNQAIWLLC*TGAR.E	0.86	1.06	1.34	0.811321	1.02913	1.26415	3	1.03487	0.22647	0.21884	0.0494439
575	Q86Y56	DNAAF5 Dynein assembly factor 5, axonemal	DNAAF5	R.AC*LQPSQDPQMR.L		1.21	0.95		1.17476	0.896226	2	1.03549	0.196951	0.1902	0.0503162
692	P50990	CCT8 T-complex protein 1 subunit theta	CCT8	R.NIQAC*KELAQTTR.T	1.17	1.08	1.02	1.10377	1.04854	0.962264	3	1.03819	0.0713202	0.0686964	0.0540758
809	Q9H0C8	ILKAP Integrin-linked kinase-associated serine/threonine	ILKAP	R.C*GVTSVPDIR.R		1.08	1.09		1.04854	1.0283	2	1.03842	0.0143131	0.0137835	0.0543939
693	Q99873	PRMT1 Protein arginine N-methyltransferase 1	PRMT1	K.VIGIEC*SSISDYAVK.I	1.13	1.12	1.02	1.06604	1.08738	0.962264	3	1.03856	0.0669303	0.0644453	0.0545848
449	P40926	MDH2 Malate dehydrogenase, mitochondrial	MDH2	K.GYLGPEQLPDC*LK.G		1.28	0.89		1.24272	0.839623	2	1.04117	0.285032	0.273761	0.0582064
1021	Q6P2E9	EDC4 Enhancer of mRNA-decapping protein 4	EDC4	R.LC*TQLEGLQSTVTGHVER.A		0.94	1.24		0.912621	1.16981	2	1.04122	0.181861	0.174662	0.0582699
994	O94925	GLS Glutaminase kidney isoform, mitochondrial	GLS	R.LKEC*MDMLR.L	0.98	1.08	1.22	0.924528	1.04854	1.15094	3	1.04134	0.113379	0.108879	0.0584391
1004	Q9NP61	ARFGAP3 ADP-ribosylation factor GTPase-activating protein	ARFGAP3	K.LANTC*FNEIEK.Q		0.95	1.23		0.92233	1.16038	2	1.04135	0.168325	0.16164	0.0584602
827	O43175	PHGDH D-3-phosphoglycerate dehydrogenase	PHGDH	K.NAGNC*LSPAVIVGLLK.E	1.06	1.12	1.1	1	1.08738	1.03774	3	1.0417	0.0438243	0.0420698	0.0589465
941	P85037	FOXK1 Forkhead box protein K1	FOXK1	R.SGGLQTPEC*LSR.E		0.99	1.19		0.961165	1.12264	2	1.0419	0.114181	0.109589	0.0592214
854	Q8NB16	MLKL Mixed lineage kinase domain-like protein	MLKL	K.C*MQEIPQEQIK.E		1.06	1.12		1.02913	1.0566	2	1.04286	0.0194296	0.018631	0.0605524
796	P35270	SPR Sepiapterin reductase	SPR	K.GKLVDC*K.V		1.1	1.08		1.06796	1.01887	2	1.04341	0.0347142	0.0332698	0.0613124
752	P38606	ATP6V1A V-type proton ATPase catalytic subunit A	ATP6V1A	R.VLDALFPCVQGGTTAIPGAFGC*GK.T		1.13	1.05		1.09709	0.990566	2	1.04383	0.075322	0.0721595	0.0618822
558	P62266	RPS23 40S ribosomal protein S23	RPS23	K.ITAFVPNDGC*LNFIEENDEVLVAGFGR.K	1.3	1.05	0.94	1.22642	1.01942	0.886792	3	1.04421	0.171163	0.163917	0.0624096
975	P08708	RPS17 40S ribosomal protein S17	RPS17	K.RVC*EEIAIIPSK.K	1.02	1.06	1.21	0.962264	1.02913	1.14151	3	1.0443	0.0905809	0.0867384	0.0625361
1226	P09211	GSTP1 Glutathione S-transferase P	GSTP1	K.ASC*LYGQLPK.F	0.72	1.16	1.41	0.679245	1.12621	1.33019	3	1.04522	0.332945	0.318542	0.0638009
990	Q9NUU7	DDX19A ATP-dependent RNA helicase DDX19A	DDX19A	K.VLVTTNVC*AR.G		0.97	1.22		0.941748	1.15094	2	1.04635	0.147924	0.141372	0.0653593
971	P02545	LMNA Prelamin-A/C	LMNA	K.AQNTWGC*GNSLR.T		0.98	1.21		0.951456	1.14151	2	1.04648	0.134388	0.128419	0.0655487
838	P60866	RPS20 40S ribosomal protein S20	RPS20	K.TPC*GEGSK.T	1.11	1.08	1.11	1.04717	1.04854	1.04717	3	1.04763	0.000793209	0.000757148	0.0671262
825	Q9BUL9	RPP25 Ribonuclease P protein subunit p25	RPP25	R.AIVFSGC*GR.A		1.09	1.1		1.05825	1.03774	2	1.04799	0.0145074	0.013843	0.0676306
694	P55265	ADAR Double-stranded RNA-specific adenosine deaminase	ADAR	K.SPVTTLLEC*MHK.L		1.17	1.02		1.13592	0.962264	2	1.04909	0.122795	0.117049	0.0691429
1288	P04843	RPN1 Dolichyl-diphosphooligosaccharide--protein glycosy	RPN1	R.LKTEGSDLC*DR.V	1.24	0.6	1.48	1.16981	0.582524	1.39623	3	1.04952	0.419976	0.40016	0.0697306
619	O00429	DNM1L Dynamin-1-like protein	DNM1L	R.IIQHC*SNYSTQELLR.F		1.21	0.98		1.17476	0.924528	2	1.04964	0.176939	0.16857	0.0698984
1261	P14618	PKM Pyruvate kinase PKM	PKM	R.AEGSDVANAVLDGADC*IMLSGETAK.G	0.87	0.99	1.45	0.820755	0.961165	1.36792	3	1.04995	0.284184	0.270665	0.070318
727	P55060	CSE1L Exportin-2	CSE1L	R.AAC*DLVR.G	1.27	1	1.04	1.19811	0.970874	0.981132	3	1.05004	0.128338	0.122222	0.0704439
493	P42765	ACAA2 3-ketoacyl-CoA thiolase, mitochondrial	ACAA2	K.ISREEC*DKYALQSQQR.W	1.35	1.05	0.91	1.27358	1.01942	0.858491	3	1.0505	0.209285	0.199225	0.0710729
615	Q9HAV7	GRPEL1 GrpE protein homolog 1, mitochondrial	GRPEL1	K.ATQC*VPKEEIKDDNPHLK.N	1.27	1.06	0.98	1.19811	1.02913	0.924528	3	1.05059	0.13805	0.131402	0.0711987
495	Q9NX63	CHCHD3 MICOS complex subunit MIC19	CHCHD3	R.ERIC*SEEER.A		1.28	0.91		1.24272	0.858491	2	1.0506	0.27169	0.258604	0.0712197
972	Q13045	FLII Protein flightless-1 homolog	FLII	R.TGLC*YLPEELAALQK.L		0.99	1.21		0.961165	1.14151	2	1.05134	0.127523	0.121296	0.0722255
919	Q9UHD8	SEPT9 Septin-9	44083	R.SQEATEAAPSC*VGDMADTPR.D		1.03	1.17		1	1.10377	2	1.05189	0.073379	0.0697594	0.0729794
918	Q9UJW0	DCTN4 Dynactin subunit 4	DCTN4	R.LLQPDFQPVC*ASQLYPR.H		1.03	1.17		1	1.10377	2	1.05189	0.073379	0.0697594	0.0729794
906	Q14318	FKBP8 Peptidyl-prolyl cis-trans isomerase FKBP8	FKBP8	R.EC*GNAHYQR.A		1.04	1.16		1.00971	1.09434	2	1.05202	0.0598431	0.0568837	0.0731679
1663	P62701	RPS4X 40S ribosomal protein S4, X isoform	RPS4X	R.EC*LPLIIFLR.N	1.12	1.08		1.0566	1.04854		2	1.05257	0.00569934	0.00541467	0.0739213
826	P55060	CSE1L Exportin-2	CSE1L	K.NLFEDQNTLTSIC*EK.V		1.1	1.1		1.06796	1.03774	2	1.05285	0.0213725	0.0202997	0.0742979
753	P78527	PRKDC DNA-dependent protein kinase catalytic subunit	PRKDC	K.INQVFHGSC*ITEGNELTK.T		1.15	1.05		1.1165	0.990566	2	1.05354	0.0890522	0.084527	0.0752389
973	O94808	GFPT2 Glutamine--fructose-6-phosphate aminotransferase [	GFPT2	R.ETDC*GVHINAGPEIGVASTK.A		1	1.21		0.970874	1.14151	2	1.05619	0.120658	0.114238	0.0788716
942	P30084	ECHS1 Enoyl-CoA hydratase, mitochondrial	ECHS1	K.AFAAGADIKEMQNLSFQDC*YSSK.F		1.02	1.19		0.990291	1.12264	2	1.05647	0.0935858	0.0885838	0.0792469
1211	O95081	AGFG2 Arf-GAP domain and FG repeat-containing protein 2	AGFG2	R.VRELGGC*SQAGNR.H	0.85		1.39	0.801887		1.31132	2	1.0566	0.360224	0.340926	0.0794345
273	O14920	IKBKB Inhibitor of nuclear factor kappa-B kinase subunit	IKBKB	R.GTDPTYGPNGC*FK.A		1.41	0.79		1.36893	0.745283	2	1.05711	0.440986	0.417163	0.0801221
709	P62888	RPL30 60S ribosomal protein L30	RPL30	K.YYRVC*TLAIIDPGDSDIIR.S	1.21	1.09	1.03	1.14151	1.05825	0.971698	3	1.05715	0.084911	0.0803204	0.0801846
810	P49368	CCT3 T-complex protein 1 subunit gamma	CCT3	R.TLIQNC*GASTIR.L		1.12	1.09		1.08738	1.0283	2	1.05784	0.0417736	0.0394895	0.0811218
754	Q9P2N5	RBM27 RNA-binding protein 27	RBM27	K.TPSKLC*SGSK.S		1.16	1.05		1.12621	0.990566	2	1.05839	0.0959173	0.0906257	0.0818711
1102	P62857	RPS28 40S ribosomal protein S28	RPS28	R.TGSQGQC*TQVR.V	1.07	0.97	1.3	1.00943	0.941748	1.22642	3	1.0592	0.148716	0.140404	0.0829735
1703	O95373	IPO7 Importin-7	IPO7	R.GIDQC*IPLFVEAALER.L	0.96	1.25		0.90566	1.21359		2	1.05963	0.217741	0.205488	0.0835556
992	Q01518	CAP1 Adenylyl cyclase-associated protein 1	CAP1	R.ALLVTASQC*QQPAENK.L		1	1.22		0.970874	1.15094	2	1.06091	0.127328	0.120018	0.0853004
220	Q9P0L0	VAPA Vesicle-associated membrane protein-associated pro	VAPA	R.KLMEEC*KR.L	1.5		0.75	1.41509		0.707547	2	1.06132	0.500311	0.471405	0.0858607
970	P53396	ACLY ATP-citrate synthase	ACLY	R.KPASFMTSIC*DER.G	1.18	0.96	1.21	1.11321	0.932039	1.14151	3	1.06225	0.113652	0.106992	0.087126
772	P51570	GALK1 Galactokinase	GALK1	R.RQC*EEVAR.A		1.16	1.06		1.12621	1	2	1.06311	0.0892465	0.0839488	0.0882865
695	Q68EM7	ARHGAP17 Rho GTPase-activating protein 17	ARHGAP17	K.AALDC*STSHLDEFYSDPHAVAGALK.S		1.2	1.02		1.16505	0.962264	2	1.06366	0.14339	0.134809	0.0890321
1145	Q99439	CNN2 Calponin-2	CNN2	K.LGTDKC*DNSSMSLQMGYTQGANQSGQVFGLGR.Q		0.89	1.34		0.864078	1.26415	2	1.06411	0.282895	0.26585	0.0896531
895	P35658	NUP214 Nuclear pore complex protein Nup214	NUP214	R.TSC*KDDEAVVQAPR.H		1.08	1.15		1.04854	1.08491	2	1.06672	0.0257118	0.0241035	0.0931879
857	Q06210	GFPT1 Glutamine--fructose-6-phosphate aminotransferase [	GFPT1	R.QGRPVVIC*DKEDTETIK.N		1.11	1.12		1.07767	1.0566	2	1.06714	0.014896	0.0139588	0.0937452
711	Q9BZG1	RAB34 Ras-related protein Rab-34	RAB34	R.VTC*ACQEHR.T		1.2	1.03		1.16505	0.971698	2	1.06837	0.136719	0.12797	0.0954159
894	P26599	PTBP1 Polypyrimidine tract-binding protein 1	PTBP1	K.RGSDELFSTC*VTNGPFIMSSNSASAANGNDSK.K	1.21	1.01	1.15	1.14151	0.980583	1.08491	3	1.069	0.0816341	0.076365	0.0962608
620	P46940	IQGAP1 Ras GTPase-activating-like protein IQGAP1	IQGAP1	K.QIPAITC*IQSQWR.G		1.25	0.98		1.21359	0.924528	2	1.06906	0.204399	0.191195	0.0963432
629	P62913	RPL11 60S ribosomal protein L11	RPL11	R.TGC*IGAK.H	1.21	1.17	0.99	1.14151	1.13592	0.933962	3	1.07046	0.118248	0.110464	0.0982372
974	Q15365	PCBP1 Poly(rC)-binding protein 1	PCBP1	R.LSSEKGMGC*S.-		1.03	1.21		1	1.14151	2	1.07075	0.100062	0.0934502	0.098628
878	O43390	HNRNPR Heterogeneous nuclear ribonucleoprotein R	HNRNPR	K.SAFLC*GVMK.T	1.02	1.22	1.13	0.962264	1.18447	1.06604	3	1.07092	0.111181	0.103818	0.0988543
943	O15372	EIF3H Eukaryotic translation initiation factor 3 subunit	EIF3H	K.LMEVC*KEKDFSPEALKK.A		1.05	1.19		1.01942	1.12264	2	1.07103	0.0729904	0.0681498	0.0989982
714	P00505	GOT2 Aspartate aminotransferase, mitochondrial	GOT2	R.VGAFTMVC*K.D	1.02	1.32	1.03	0.962264	1.28155	0.971698	3	1.07184	0.18168	0.169503	0.100088
811	Q9UHD8	SEPT9 Septin-9	44083	K.LTVIDTPGFGDHINNENC*WQPIMK.F		1.15	1.09		1.1165	1.0283	2	1.0724	0.0623689	0.0581581	0.100848
787	O94808	GFPT2 Glutamine--fructose-6-phosphate aminotransferase [	GFPT2	K.C*QNALQQVTAR.Q		1.17	1.07		1.13592	1.00943	2	1.07268	0.0894408	0.0833808	0.101217
755	O43172	PRPF4 U4/U6 small nuclear ribonucleoprotein Prp4	PRPF4	K.DVNLASC*AADGSVK.L		1.19	1.05		1.15534	0.990566	2	1.07295	0.116513	0.108591	0.101587
732	O43684	BUB3 Mitotic checkpoint protein BUB3	BUB3	R.TPC*NAGTFSQPEK.V		1.2	1.04		1.16505	0.981132	2	1.07309	0.130049	0.121191	0.101771
561	Q9BUL9	RPP25 Ribonuclease P protein subunit p25	RPP25	R.SEEAPAGC*GAEGGGPGSGPFADLAPGAVHMR.V		1.3	0.94		1.26214	0.886792	2	1.07446	0.265408	0.247014	0.103617
808	Q7L1Q6	BZW1 Basic leucine zipper and W2 domain-containing prot	BZW1	K.ERFDPTQFQDC*IIQGLTETGTDLEAVAK.F	1.25	1.05	1.09	1.17925	1.01942	1.0283	3	1.07565	0.0898218	0.0835043	0.105215
812	Q52LJ0	FAM98B Protein FAM98B	FAM98B	K.TAC*AINK.V		1.16	1.09		1.12621	1.0283	2	1.07726	0.069234	0.0642688	0.107363
1175	P43686	PSMC4 26S proteasome regulatory subunit 6B	PSMC4	R.GVLMYGPPGC*GK.T	1.03	1	1.37	0.971698	0.970874	1.29245	3	1.07834	0.185426	0.171955	0.108814
621	O00469	PLOD2 Procollagen-lysine,2-oxoglutarate 5-dioxygenase 2	PLOD2	R.DKLDPDMALC*R.N		1.27	0.98		1.23301	0.924528	2	1.07877	0.218129	0.202202	0.109386
1084	P35270	SPR Sepiapterin reductase	SPR	R.TVVNISSLC*ALQPFK.G		0.97	1.29		0.941748	1.21698	2	1.07936	0.19462	0.180309	0.110182
932	Q04637	EIF4G1 Eukaryotic translation initiation factor 4 gamma 1	EIF4G1	R.LQGINC*GPDFTPSFANLGR.T	1.1	1.12	1.18	1.03774	1.08738	1.11321	3	1.07944	0.0383569	0.0355341	0.110284
1106	P48643	CCT5 T-complex protein 1 subunit epsilon	CCT5	K.VVNSC*HR.Q	0.98	1.12	1.3	0.924528	1.08738	1.22642	3	1.07944	0.1511	0.13998	0.110284
1048	Q09666	AHNAK Neuroblast differentiation-associated protein AHNA	AHNAK	K.GPFVEAEVPDVDLEC*PDAK.L		1	1.26		0.970874	1.18868	2	1.07978	0.154012	0.142633	0.110733
1718	O94903	PROSC Pyridoxal phosphate homeostasis protein	PROSC	K.KPTPDKC*AADVK.A	0.89	1.36		0.839623	1.32039		2	1.08001	0.339953	0.314769	0.111039
993	Q9Y490	TLN1 Talin-1	TLN1	K.AVAAGNSC*R.Q		1.04	1.22		1.00971	1.15094	2	1.08033	0.099868	0.0924424	0.111467
955	Q14151	SAFB2 Scaffold attachment factor B2	SAFB2	R.DSKEDGRKFDFDAC*NEVPPAPK.E		1.06	1.2		1.02913	1.13208	2	1.0806	0.0727961	0.0673663	0.111834
1327	P20810	CAST Calpastatin	CAST	K.AAAPAPVSEAVC*R.T		0.74	1.53		0.718447	1.4434	2	1.08092	0.512617	0.474241	0.112262
813	Q9NVX0	HAUS2 HAUS augmin-like complex subunit 2	HAUS2	R.KQQNEVSSC*IPK.I		1.17	1.09		1.13592	1.0283	2	1.08211	0.0760991	0.0703246	0.11385
490	P50213	IDH3A Isocitrate dehydrogenase [NAD] subunit alpha, mito	IDH3A	R.IEAAC*FATIK.D	1.57	0.94	0.91	1.48113	0.912621	0.858491	3	1.08408	0.34492	0.318168	0.116473
897	Q15599	SLC9A3R2 Na(+)/H(+) exchange regulatory cofactor NHE-RF2	SLC9A3R2	R.VTPTEEHVEGPLPSPVTNGTSPAQLNGGSAC*SSR.S		1.12	1.15		1.08738	1.08491	2	1.08614	0.00174866	0.00160997	0.119213
873	Q6PKG0	LARP1 La-related protein 1	LARP1	R.TASISSSPSEGTPTVGSYGC*TPQSLPK.F		1.14	1.13		1.1068	1.06604	2	1.08642	0.0288205	0.0265281	0.119578
712	P49792	RANBP2 E3 SUMO-protein ligase RanBP2	RANBP2	K.VC*ANHVITK.T		1.24	1.03		1.20388	0.971698	2	1.08779	0.16418	0.15093	0.121401
1049	P35914	HMGCL Hydroxymethylglutaryl-CoA lyase, mitochondrial	HMGCL	K.NINC*SIEESFQR.F		1.02	1.26		0.990291	1.18868	2	1.08949	0.140281	0.128759	0.123647
1024	P62701	RPS4X 40S ribosomal protein S4, X isoform	RPS4X	K.FDTGNLC*MVTGGANLGR.I		1.04	1.24		1.00971	1.16981	2	1.08976	0.11321	0.103885	0.12401
1023	Q9H9A6	LRRC40 Leucine-rich repeat-containing protein 40	LRRC40	K.AGGRDC*GTSVPQGLLK.A		1.04	1.24		1.00971	1.16981	2	1.08976	0.11321	0.103885	0.12401
1089	P09234	SNRPC U1 small nuclear ribonucleoprotein C	SNRPC	K.THC*SGR.K	0.92	1.22	1.29	0.867925	1.18447	1.21698	3	1.08979	0.192828	0.176941	0.124051
1313	P35998	PSMC2 26S proteasome regulatory subunit 7	PSMC2	R.AVANRTDAC*FIR.V		0.78	1.51		0.757282	1.42453	2	1.0909	0.471815	0.432498	0.125525
1215	Q04637	EIF4G1 Eukaryotic translation initiation factor 4 gamma 1	EIF4G1	K.NHDEESLEC*LCR.L		0.89	1.4		0.864078	1.32075	2	1.09242	0.322919	0.295601	0.127523
1214	Q9NQZ5	STARD7 StAR-related lipid transfer protein 7, mitochondri	STARD7	R.KNEGSC*GPAR.I		0.89	1.4		0.864078	1.32075	2	1.09242	0.322919	0.295601	0.127523
1146	Q14566	MCM6 DNA replication licensing factor MCM6	MCM6	R.NPVC*ANR.R		0.95	1.34		0.92233	1.26415	2	1.09324	0.241704	0.221089	0.128611
496	Q9UBB4	ATXN10 Ataxin-10	ATXN10	K.ETTNIFSNCGC*VR.A		1.37	0.91		1.3301	0.858491	2	1.09429	0.333476	0.304741	0.13
432	O15533	TAPBP Tapasin	TAPBP	K.WASGLTPAQNC*PR.A		1.4	0.88		1.35922	0.830189	2	1.09471	0.374084	0.341721	0.130543
956	P55072	VCP Transitional endoplasmic reticulum ATPase	VCP	K.AIANEC*QANFISIK.G		1.09	1.2		1.05825	1.13208	2	1.09516	0.0522008	0.0476648	0.131147
921	Q7RTV0	PHF5A PHD finger-like domain-containing protein 5A	PHF5A	K.CVICDSYVRPC*TLVR.I		1.12	1.17		1.08738	1.10377	2	1.09558	0.011593	0.0105816	0.13169
898	Q9NR50	EIF2B3 Translation initiation factor eIF-2B subunit gamma	EIF2B3	K.ALC*AEFK.M		1.14	1.15		1.1068	1.08491	2	1.09585	0.0154789	0.014125	0.132052
979	P62249	RPS16 40S ribosomal protein S16	RPS16	K.KTATAVAHC*K.R	1.03	1.21	1.21	0.971698	1.17476	1.14151	3	1.09599	0.108915	0.0993757	0.132232
840	Q7L576	CYFIP1 Cytoplasmic FMR1-interacting protein 1	CYFIP1	K.C*NEQPNRVEIYEK.T		1.18	1.11		1.14563	1.04717	2	1.0964	0.0696226	0.0635011	0.132775
1216	P51610	HCFC1 Host cell factor 1	HCFC1	R.AC*AAGTPAVIR.I		0.9	1.4		0.873786	1.32075	2	1.09727	0.316054	0.288037	0.133919
958	Q9UBB4	ATXN10 Ataxin-10	ATXN10	R.HAELIASTFVDQC*K.T	1.13	1.13	1.2	1.06604	1.09709	1.13208	3	1.0984	0.0330384	0.0300787	0.135404
1103	Q1KMD3	HNRNPUL2 Heterogeneous nuclear ribonucleoprotein U-like pro	HNRNPUL2	R.LQEALDAEMLEDEAGGGGAGPGGAC*K.A		1	1.3		0.970874	1.22642	2	1.09864	0.180695	0.164471	0.135725
1067	Q14204	DYNC1H1 Cytoplasmic dynein 1 heavy chain 1	DYNC1H1	R.TC*EKVEER.N	0.98	1.21	1.27	0.924528	1.17476	1.19811	3	1.09913	0.151662	0.137984	0.136366
1266	P00338	LDHA L-lactate dehydrogenase A chain	LDHA	K.NRVIGSGC*NLDSAR.F	0.64	1.37	1.45	0.603774	1.3301	1.36792	3	1.1006	0.430678	0.391313	0.138288
899	Q96HE7	ERO1A ERO1-like protein alpha	ERO1A	K.HDDSSDNFC*EADDIQSPEAEYVDLLLNPER.Y	1.16	1.16	1.15	1.09434	1.12621	1.08491	3	1.10182	0.021646	0.0196457	0.139888
1119	P49458	SRP9 Signal recognition particle 9 kDa protein	SRP9	R.HSDGNLC*VK.V	1	1.16	1.31	0.943396	1.12621	1.23585	3	1.10182	0.147745	0.134091	0.139888
1120	P62241	RPS8 40S ribosomal protein S8	RPS8	K.NC*IVLIDSTPYR.Q	1	1.16	1.31	0.943396	1.12621	1.23585	3	1.10182	0.147745	0.134091	0.139888
798	P62753	RPS6 40S ribosomal protein S6	RPS6	K.LNISFPATGC*QK.L	1.22	1.17	1.08	1.15094	1.13592	1.01887	3	1.10191	0.0723087	0.0656212	0.140008
976	Q9Y5Y2	NUBP2 Cytosolic Fe-S cluster assembly factor NUBP2	NUBP2	K.VGILDVDLC*GPSIPR.M		1.1	1.21		1.06796	1.14151	2	1.10474	0.0520065	0.047076	0.143701
1299	P07237	P4HB Protein disulfide-isomerase	P4HB	R.ITEFC*HR.F	0.85	1.14	1.49	0.801887	1.1068	1.40566	3	1.10478	0.301892	0.273259	0.143761
957	P25205	MCM3 DNA replication licensing factor MCM3	MCM3	R.YVLC*TAPR.A		1.11	1.2		1.07767	1.13208	2	1.10487	0.0384705	0.034819	0.14388
874	Q9HC36	MRM3 rRNA methyltransferase 3, mitochondrial	MRM3	K.ASDHGWVC*DQR.V		1.18	1.13		1.14563	1.06604	2	1.10583	0.056281	0.0508946	0.145135
556	Q9H0L4	CSTF2T Cleavage stimulation factor subunit 2 tau variant	CSTF2T	K.LC*VQNSHQEAR.N	1.51	1.04	0.94	1.42453	1.00971	0.886792	3	1.10701	0.281763	0.254527	0.146668
713	Q9BXB5	OSBPL10 Oxysterol-binding protein-related protein 10	OSBPL10	R.ATSAGSSPSC*SLAGR.G		1.28	1.03		1.24272	0.971698	2	1.10721	0.19164	0.173084	0.146927
1165	P62937	PPIA Peptidyl-prolyl cis-trans isomerase A	PPIA	K.KITIADC*GQLE.-		0.96	1.36		0.932039	1.28302	2	1.10753	0.24818	0.224085	0.147344
622	P62879	GNB2 Guanine nucleotide-binding protein G(I)/G(S)/G(T)	GNB2	R.KAC*GDSTLTQITAGLDPVGR.I		1.33	0.98		1.29126	0.924528	2	1.1079	0.25932	0.234065	0.147821
574	O14980	XPO1 Exportin-1	XPO1	K.LDINLLDNVVNC*LYHGEGAQQR.M	1.37	1.17	0.95	1.29245	1.13592	0.896226	3	1.1082	0.199563	0.180078	0.148219
1085	P60763	RAC3 Ras-related C3 botulinum toxin substrate 3	RAC3	R.AVLC*PPPVK.K		1.03	1.29		1	1.21698	2	1.10849	0.153429	0.138412	0.148596
875	P49207	RPL34 60S ribosomal protein L34	RPL34	R.AYGGSMC*AK.C		1.19	1.13		1.15534	1.06604	2	1.11069	0.0631461	0.0568531	0.151455
1086	Q9P258	RCC2 Protein RCC2	RCC2	R.C*SSSSGGGSSGDEDGLELDGAPGGGKR.A		1.04	1.29		1.00971	1.21698	2	1.11334	0.146564	0.131643	0.154901
1050	P39023	RPL3 60S ribosomal protein L3	RPL3	K.TVFAEHISDEC*K.R		1.07	1.26		1.03883	1.18868	2	1.11376	0.105956	0.0951338	0.155435
863	Q15019	SEPT2 Septin-2	44076	R.LTVVDTPGYGDAINC*RDC*FK.T	0.92	1.46	1.12	0.867925	1.41748	1.0566	3	1.114	0.279236	0.25066	0.155751
1005	Q53H96	PYCR3 Pyrroline-5-carboxylate reductase 3	PYCR3	R.AATMSAVEAATC*R.A		1.1	1.23		1.06796	1.16038	2	1.11417	0.0653481	0.0586519	0.155968
1118	P62273	RPS29 40S ribosomal protein S29	RPS29	K.YGLNMC*R.Q	1.05	1.15	1.31	0.990566	1.1165	1.23585	3	1.11431	0.122656	0.110074	0.156146
389	P28838	LAP3 Cytosol aminopeptidase	LAP3	R.SAGAC*TAAAFLK.E		1.46	0.86		1.41748	0.811321	2	1.1144	0.428616	0.384617	0.156265
944	Q9NUQ3	TXLNG Gamma-taxilin	TXLNG	R.TDPPDGQQDSEC*NR.N		1.14	1.19		1.1068	1.12264	2	1.11472	0.0112044	0.0100513	0.15668
1192	P63241	EIF5A Eukaryotic translation initiation factor 5A-1	EIF5A	K.KYEDIC*PSTHNMDVPNIK.R	0.88	1.25	1.38	0.830189	1.21359	1.30189	3	1.11522	0.250763	0.224855	0.157332
876	P22626	HNRNPA2B1 Heterogeneous nuclear ribonucleoproteins A2/B1	HNRNPA2B1	K.LTDC*VVMRDPASKR.S		1.2	1.13		1.16505	1.06604	2	1.11554	0.0700112	0.0627598	0.157746
830	P25205	MCM3 DNA replication licensing factor MCM3	MCM3	R.SVHYC*PATK.K	1.08	1.33	1.1	1.01887	1.29126	1.03774	3	1.11596	0.152113	0.136307	0.158279
773	O00429	DNM1L Dynamin-1-like protein	DNM1L	R.C*VELVHEEMQR.I		1.27	1.06		1.23301	1	2	1.1165	0.164763	0.14757	0.15899
977	P61247	RPS3A 40S ribosomal protein S3a	RPS3A	R.DKMC*SMVK.K	1.17	1.14	1.21	1.10377	1.1068	1.14151	3	1.11736	0.0209688	0.0187664	0.160094
1114	Q9UHX1	PUF60 Poly(U)-binding-splicing factor PUF60	PUF60	R.ALAIMC*R.V		1.03	1.31		1	1.23585	2	1.11792	0.16677	0.149179	0.160823
877	O14879	IFIT3 Interferon-induced protein with tetratricopeptide	IFIT3	K.GLNPLNAYSDLAEFLETEC*YQTPFNK.E		1.21	1.13		1.17476	1.06604	2	1.1204	0.0768763	0.0686152	0.164011
814	P29590	PML Protein PML	PML	R.LQDLSSC*ITQGK.D		1.25	1.09		1.21359	1.0283	2	1.12095	0.13102	0.116883	0.164718
731	P15880	RPS2 40S ribosomal protein S2	RPS2	R.GC*TATLGNFAK.A	1.3	1.19	1.04	1.22642	1.15534	0.981132	3	1.12096	0.126203	0.112585	0.164738
1147	O60502	MGEA5 Protein O-GlcNAcase	MGEA5	R.ANSSVVSVNC*K.G		1.01	1.34		0.980583	1.26415	2	1.12237	0.200513	0.178652	0.166544
1287	P32119	PRDX2 Peroxiredoxin-2	PRDX2	R.LVQAFQYTDEHGEVC*PAGWKPGSDTIKPNVDDSKEYFSK.H	0.91		1.47	0.858491		1.38679	2	1.12264	0.373566	0.332756	0.166897
1127	Q9H2U1	DHX36 ATP-dependent RNA helicase DHX36	DHX36	K.NTPC*SENKLDIQEK.K		1.03	1.32		1	1.24528	2	1.12264	0.173441	0.154494	0.166897
562	Q00536	CDK16 Cyclin-dependent kinase 16	CDK16	R.LEHEEGAPC*TAIR.E		1.4	0.94		1.35922	0.886792	2	1.12301	0.334059	0.297468	0.167368
523	Q9UBE0	SAE1 SUMO-activating enzyme subunit 1	SAE1	R.YCFSEMAPVC*AVVGGILAQEIVK.A		1.42	0.92		1.37864	0.867925	2	1.12328	0.361131	0.321496	0.167721
1088	P17987	TCP1 T-complex protein 1 subunit alpha	TCP1	R.GANDFMC*DEMER.S	1.13	1.12	1.29	1.06604	1.08738	1.21698	3	1.12347	0.0816865	0.0727094	0.167956
1339	Q14690	PDCD11 Protein RRP5 homolog	PDCD11	R.VLLC*DPEAK.K		0.8	1.56		0.776699	1.4717	2	1.1242	0.491439	0.437146	0.168897
1169	P61289	PSME3 Proteasome activator complex subunit 3	PSME3	R.LDEC*EEAFQGTK.V	0.97	1.21	1.36	0.915094	1.17476	1.28302	3	1.12429	0.189083	0.16818	0.169014
996	Q9H410	DSN1 Kinetochore-associated protein DSN1 homolog	DSN1	K.LQLQNPPAIHGSGSGSC*Q.-	1.1	1.22	1.22	1.03774	1.18447	1.15094	3	1.12438	0.0768868	0.0683814	0.169132
900	P82912	MRPS11 28S ribosomal protein S11, mitochondrial	MRPS11	K.ASHNNTQIQVVSASNEPLAFASC*GTEGFR.N		1.2	1.15		1.16505	1.08491	2	1.12498	0.0566696	0.050374	0.169896
841	P46821	MAP1B Microtubule-associated protein 1B	MAP1B	K.TATC*HSSSSPPIDAASAEPYGFR.A		1.24	1.11		1.20388	1.04717	2	1.12553	0.110813	0.0984546	0.1706
544	P62316	SNRPD2 Small nuclear ribonucleoprotein Sm D2	SNRPD2	K.NNTQVLINC*R.N	1.88	0.74	0.94	1.77358	0.718447	0.886792	3	1.12627	0.566871	0.503315	0.171559
628	Q9H410	DSN1 Kinetochore-associated protein DSN1 homolog	DSN1	K.KGGNC*DLSHQER.L	1.46	1.1	0.99	1.37736	1.06796	0.933962	3	1.12643	0.227407	0.201883	0.171754
896	Q15024	EXOSC7 Exosome complex component RRP42	EXOSC7	K.GVVTC*MR.K	1.28	1.12	1.15	1.20755	1.08738	1.08491	3	1.12661	0.0701041	0.0622257	0.171989
1141	P62241	RPS8 40S ribosomal protein S8	RPS8	R.LDVGNFSWGSEC*C*TR.K	1.1	1.12	1.33	1.03774	1.08738	1.25472	3	1.12661	0.113686	0.10091	0.171989
665	Q14694	USP10 Ubiquitin carboxyl-terminal hydrolase 10	USP10	R.TPSYSISSTLNPQAPEFILGC*TASK.I		1.34	1.01		1.30097	0.95283	2	1.1269	0.246173	0.218451	0.17236
922	Q9HA64	FN3KRP Ketosamine-3-kinase	FN3KRP	R.ATGHSGGGC*ISQGR.S	1.21	1.17	1.17	1.14151	1.13592	1.10377	3	1.12707	0.0203664	0.0180703	0.172575
1692	P21333	FLNA Filamin-A	FLNA	K.ATC*APQHGAPGPGPADASK.V	1.17	1.19		1.10377	1.15534		2	1.12956	0.0364628	0.0322807	0.175757
828	Q9Y448	KNSTRN Small kinetochore-associated protein	KNSTRN	R.FLEQQTLC*NNQVNDLTTALK.E		1.26	1.1		1.2233	1.03774	2	1.13052	0.131214	0.116066	0.176984
815	Q9BU23	LMF2 Lipase maturation factor 2	LMF2	K.DSGAASEQATAAPNPC*SSSSR.T		1.27	1.09		1.23301	1.0283	2	1.13066	0.14475	0.128023	0.17716
666	P61158	ACTR3 Actin-related protein 3	ACTR3	R.YSYVC*PDLVK.E		1.35	1.01		1.31068	0.95283	2	1.13175	0.253038	0.22358	0.178562
1116	P49458	SRP9 Signal recognition particle 9 kDa protein	SRP9	K.VTDDLVC*LVYK.T		1.06	1.31		1.02913	1.23585	2	1.13249	0.146175	0.129074	0.179495
1115	P49753	ACOT2 Acyl-coenzyme A thioesterase 2, mitochondrial	ACOT2	K.SEFYANEAC*KR.L		1.06	1.31		1.02913	1.23585	2	1.13249	0.146175	0.129074	0.179495
1104	O43865	AHCYL1 S-adenosylhomocysteine hydrolase-like protein 1	AHCYL1	K.AGKLC*VPAMNVNDSVTK.Q		1.07	1.3		1.03883	1.22642	2	1.13263	0.132639	0.117108	0.17967
1063	Q15369	ELOC Elongin-C	ELOC	K.TYGGC*EGPDAMYVK.L		1.1	1.27		1.06796	1.19811	2	1.13304	0.0920314	0.0812254	0.180195
1051	Q9NVU0	POLR3E DNA-directed RNA polymerase III subunit RPC5	POLR3E	R.AAGTDSFNGHPPQGC*ASTPVAR.E		1.11	1.26		1.07767	1.18868	2	1.13317	0.0784955	0.0692704	0.18037
978	P13639	EEF2 Elongation factor 2	EEF2	R.YVEPIEDVPC*GNIVGLVGVDQFLVK.T		1.16	1.21		1.12621	1.14151	2	1.13386	0.0108158	0.0095389	0.181244
1010	Q9Y6C9	MTCH2 Mitochondrial carrier homolog 2	MTCH2	R.LC*SGVLGTVVHGK.V	1.05	1.29	1.23	0.990566	1.25243	1.16038	3	1.13446	0.132841	0.117097	0.182002
788	P49327	FASN Fatty acid synthase	FASN	R.LGMLSPEGTC*K.A		1.3	1.07		1.26214	1.00943	2	1.13578	0.178687	0.157325	0.18369
774	P53597	SUCLG1 Succinate--CoA ligase [ADP/GDP-forming] subunit al	SUCLG1	K.IIC*QGFTGK.Q		1.31	1.06		1.27184	1	2	1.13592	0.192223	0.169222	0.183864
920	P13987	CD59 CD59 glycoprotein	CD59	K.FEHC*NFNDVTTR.L	1.29	1.12	1.17	1.21698	1.08738	1.10377	3	1.13604	0.0705709	0.0621199	0.184019
667	Q13501	SQSTM1 Sequestosome-1	SQSTM1	K.SSSQPSSC*CSDPSKPGGNVEGATQSLAEQMR.K		1.36	1.01		1.32039	0.95283	2	1.13661	0.259903	0.228665	0.184736
1064	P01891	HLA-A HLA class I histocompatibility antigen, A-68 alpha	HLA-A	R.KGGSYSQAASSDSAQGSDVSLTAC*K.V		1.11	1.27		1.07767	1.19811	2	1.13789	0.0851663	0.0748457	0.186363
1053	Q13185	CBX3 Chromobox protein homolog 3	CBX3	R.LTWHSC*PEDEAQ.-		1.12	1.26		1.08738	1.18868	2	1.13803	0.0716303	0.0629425	0.186537
1052	Q7RTV0	PHF5A PHD finger-like domain-containing protein 5A	PHF5A	R.IC*DEC*NYGSYQGR.C		1.12	1.26		1.08738	1.18868	2	1.13803	0.0716303	0.0629425	0.186537
1006	Q9NUQ3	TXLNG Gamma-taxilin	TXLNG	R.NLVSPAYC*TQESR.E		1.15	1.23		1.1165	1.16038	2	1.13844	0.0310225	0.02725	0.18706
1132	Q16186	ADRM1 Proteasomal ubiquitin receptor ADRM1	ADRM1	R.TSGNVEDDLIIFPDDCEFKRVPQC*PSGR.V	0.84	1.42	1.32	0.792453	1.37864	1.24528	3	1.13879	0.307261	0.269813	0.187505
879	P49321	NASP Nuclear autoantigenic sperm protein	NASP	K.SVSGTDVQEEC*R.E		1.25	1.13		1.21359	1.06604	2	1.13981	0.104337	0.0915384	0.1888
1386	P27816	MAP4 Microtubule-associated protein 4	MAP4	K.C*SLPAEEDSVLEK.L	0.65	1.28	1.66	0.613208	1.24272	1.56604	3	1.14065	0.484545	0.424796	0.189862
1166	P27361	MAPK3 Mitogen-activated protein kinase 3	MAPK3	K.ISPFEHQTYC*QR.T		1.03	1.36		1	1.28302	2	1.14151	0.200125	0.175316	0.190943
1117	Q9NR46	SH3GLB2 Endophilin-B2	SH3GLB2	K.SQTTYYAQC*YR.H		1.08	1.31		1.04854	1.23585	2	1.1422	0.132445	0.115956	0.191811
537	P63010	AP2B1 AP-2 complex subunit beta	AP2B1	R.TMGC*IR.V		1.45	0.93		1.40777	0.877358	2	1.14256	0.375055	0.328258	0.192273
1078	Q7Z5L9	IRF2BP2 Interferon regulatory factor 2-binding protein 2	IRF2BP2	R.AHGC*FPEGR.S		1.11	1.28		1.07767	1.20755	2	1.14261	0.0918371	0.0803749	0.192331
883	P04350	TUBB4A Tubulin beta-4A chain	TUBB4A	K.VSDTVVEPYNATLSVHQLVENTDETYC*IDNEALYDICFR.T	1.28	1.18	1.14	1.20755	1.14563	1.07547	3	1.14288	0.0660806	0.0578192	0.192678
859	P50990	CCT8 T-complex protein 1 subunit theta	CCT8	K.IAVYSC*PFDGMITETK.G	1.24	1.24	1.12	1.16981	1.20388	1.0566	3	1.14343	0.0771019	0.0674302	0.193372
1346	P21964	COMT Catechol O-methyltransferase	COMT	R.LITIEINPDC*AAITQR.M		0.83	1.57		0.805825	1.48113	2	1.14348	0.477514	0.417598	0.193429
1238	Q00839	HNRNPU Heterogeneous nuclear ribonucleoprotein U	HNRNPU	K.MC*LFAGFQR.K	0.92	1.26	1.42	0.867925	1.2233	1.33962	3	1.14362	0.245738	0.214878	0.193603
907	Q8WX93	PALLD Palladin	PALLD	K.VSSC*EQR.L		1.23	1.16		1.19417	1.09434	2	1.14426	0.0705941	0.0616943	0.194411
816	Q16630	CPSF6 Cleavage and polyadenylation specificity factor su	CPSF6	R.ELHGQNPVVTPC*NK.Q		1.3	1.09		1.26214	1.0283	2	1.14522	0.165346	0.144379	0.195623
1138	P52272	HNRNPM Heterogeneous nuclear ribonucleoprotein M	HNRNPM	R.GC*AVVEFK.M		1.07	1.33		1.03883	1.25472	2	1.14678	0.152652	0.133114	0.197584
1087	Q96F86	EDC3 Enhancer of mRNA-decapping protein 3	EDC3	K.SQDVAVSPQQQQC*SK.S		1.11	1.29		1.07767	1.21698	2	1.14733	0.0985079	0.0858587	0.198275
1007	P08238	HSP90AB1 Heat shock protein HSP 90-beta	HSP90AB1	R.LVSSPC*CIVTSTYGWTANMER.I		1.17	1.23		1.13592	1.16038	2	1.14815	0.0172923	0.015061	0.199311
995	Q06203	PPAT Amidophosphoribosyltransferase	PPAT	K.C*ELENCQPFVVETLHGK.I		1.18	1.22		1.14563	1.15094	2	1.14829	0.00375638	0.00327129	0.199484
924	Q8TDX7	NEK7 Serine/threonine-protein kinase Nek7	NEK7	R.AAC*LLDGVPVALKK.V		1.23	1.17		1.19417	1.10377	2	1.14897	0.0639233	0.0556351	0.200346
884	P28074	PSMB5 Proteasome subunit beta type-5	PSMB5	K.KVIEINPYLLGTMAGGAADC*SFWER.L	0.8	1.67	1.14	0.754717	1.62136	1.07547	3	1.15052	0.438168	0.380845	0.202281
1128	Q96QR8	PURB Transcriptional activator protein Pur-beta	PURB	R.GGGGGPC*GFQPASR.G		1.09	1.32		1.05825	1.24528	2	1.15177	0.132251	0.114824	0.20385
1079	P49588	AARS Alanine--tRNA ligase, cytoplasmic	AARS	K.C*LSVMEAK.V		1.13	1.28		1.09709	1.20755	2	1.15232	0.0781069	0.0677824	0.204538
1109	P07900	HSP90AA1 Heat shock protein HSP 90-alpha	HSP90AA1	R.VFIMDNC*EELIPEYLNFIR.G	1.08	1.25	1.3	1.01887	1.21359	1.22642	3	1.15296	0.116303	0.100873	0.20534
433	O75369	FLNB Filamin-B	FLNB	K.NRMDGTYAC*SYTPVK.A		1.52	0.88		1.47573	0.830189	2	1.15296	0.456465	0.395908	0.20534
1093	Q08J23	NSUN2 tRNA (cytosine(34)-C(5))-methyltransferase	NSUN2	R.NNSGEEFDC*AFR.L	1.08	1.26	1.29	1.01887	1.2233	1.21698	3	1.15305	0.116248	0.100818	0.205455
1289	P21333	FLNA Filamin-A	FLNA	K.IEC*DDKGDGSCDVR.Y		0.94	1.48		0.912621	1.39623	2	1.15442	0.34196	0.296217	0.207173
646	Q96EB1	ELP4 Elongator complex protein 4	ELP4	K.ISSTLKVEPC*SLTPGYTK.L		1.41	1		1.36893	0.943396	2	1.15616	0.300899	0.260257	0.209346
1139	P52272	HNRNPM Heterogeneous nuclear ribonucleoprotein M	HNRNPM	K.GC*GVVKFESPEVAER.A		1.09	1.33		1.05825	1.25472	2	1.15648	0.138921	0.120124	0.209746
862	P49327	FASN Fatty acid synthase	FASN	K.AFDTAGNGYC*R.S	1.17	1.35	1.12	1.10377	1.31068	1.0566	3	1.15702	0.135148	0.116807	0.210413
1065	Q9Y224	C14orf166 UPF0568 protein C14orf166	C14orf166	K.LTALDYHNPAGFNC*K.D		1.15	1.27		1.1165	1.19811	2	1.15731	0.0577058	0.0498621	0.210774
925	Q99439	CNN2 Calponin-2	CNN2	K.C*ASQSGMTAYGTR.R		1.25	1.17		1.21359	1.10377	2	1.15868	0.0776535	0.0670188	0.212486
842	Q92499	DDX1 ATP-dependent RNA helicase DDX1	DDX1	R.GKGC*YNTR.L		1.31	1.11		1.27184	1.04717	2	1.15951	0.158869	0.137014	0.213512
843	Q9HB90	RRAGC Ras-related GTP-binding protein C	RRAGC	R.SC*GHQTSASSLK.A		1.31	1.11		1.27184	1.04717	2	1.15951	0.158869	0.137014	0.213512
1176	O43707	ACTN4 Alpha-actinin-4	ACTN4	K.IC*DQWDALGSLTHSR.R		1.06	1.37		1.02913	1.29245	2	1.16079	0.1862	0.160408	0.215106
1167	P83881	RPL36A 60S ribosomal protein L36a	RPL36A	R.LEC*VEPNC*R.S		1.07	1.36		1.03883	1.28302	2	1.16093	0.172664	0.14873	0.215277
1140	Q09666	AHNAK Neuroblast differentiation-associated protein AHNA	AHNAK	K.LEGDLTGPSVGVEVPDVELEC*PDAK.L		1.1	1.33		1.06796	1.25472	2	1.16134	0.132056	0.11371	0.215789
1189	P62241	RPS8 40S ribosomal protein S8	RPS8	K.LLAC*IASR.P	1.12	1.16	1.38	1.0566	1.12621	1.30189	3	1.16157	0.126406	0.108823	0.216074
1151	Q14919	DRAP1 Dr1-associated corepressor	DRAP1	K.KAC*QVTQSR.N	1.13	1.19	1.34	1.06604	1.15534	1.26415	3	1.16184	0.0992166	0.0853959	0.216415
923	P52597	HNRNPF Heterogeneous nuclear ribonucleoprotein F	HNRNPF	R.DLSYC*LSGMYDHR.Y	1.29	1.2	1.17	1.21698	1.16505	1.10377	3	1.16193	0.056668	0.0487704	0.216529
901	P49327	FASN Fatty acid synthase	FASN	K.AINC*ATSGVVGLVNCLR.R		1.28	1.15		1.24272	1.08491	2	1.16381	0.11159	0.0958836	0.218858
817	P18858	LIG1 DNA ligase 1	LIG1	R.VREDKQPEQATTSAQVAC*LYR.K		1.34	1.09		1.30097	1.0283	2	1.16464	0.192806	0.16555	0.21988
1122	P62241	RPS8 40S ribosomal protein S8	RPS8	R.PGQC*GR.A	1.16	1.2	1.31	1.09434	1.16505	1.23585	3	1.16508	0.0707547	0.0607295	0.220428
829	O75746	SLC25A12 Calcium-binding mitochondrial carrier protein Aral	SLC25A12	K.NSFDC*FKK.V	1.28	1.29	1.1	1.20755	1.25243	1.03774	3	1.1659	0.113242	0.0971281	0.221448
861	Q9BQE3	TUBA1C Tubulin alpha-1C chain	TUBA1C	R.AVC*MLSNTTAVAEAWAR.L	1.25	1.3	1.12	1.17925	1.26214	1.0566	3	1.16599	0.103405	0.0886837	0.221562
1107	Q86W42	THOC6 THO complex subunit 6 homolog	THOC6	K.VLTAAGNSC*R.V		1.14	1.3		1.1068	1.22642	2	1.16661	0.0845834	0.0725038	0.222317
1080	Q5VZ89	DENND4C DENN domain-containing protein 4C	DENND4C	K.ILTAALTC*PK.T		1.16	1.28		1.12621	1.20755	2	1.16688	0.0575115	0.0492866	0.222657
1008	P37198	NUP62 Nuclear pore glycoprotein p62	NUP62	K.DIIEHLNTSGAPADTSDPLQQIC*K.I		1.21	1.23		1.17476	1.16038	2	1.16757	0.0101681	0.00870883	0.223506
983	Q9BQE3	TUBA1C Tubulin alpha-1C chain	TUBA1C	K.AYHEQLTVAEITNAC*FEPANQMVK.C	1.19	1.28	1.21	1.12264	1.24272	1.14151	3	1.16896	0.0645726	0.0552395	0.225221
959	Q71U36	TUBA1A Tubulin alpha-1A chain	TUBA1A	R.TIQFVDWC*PTGFK.V	1.19	1.29	1.2	1.12264	1.25243	1.13208	3	1.16905	0.0723623	0.0618985	0.225334
1243	Q08499	PDE4D cAMP-specific 3,5-cyclic phosphodiesterase 4D	PDE4D	R.SPMC*NQPSINK.A		1.02	1.43		0.990291	1.34906	2	1.16967	0.253685	0.216886	0.226106
1379	P07737	PFN1 Profilin-1	PFN1	K.C*YEMASHLR.R	0.85		1.63	0.801887		1.53774	2	1.16981	0.520324	0.444793	0.226276
1156	P55735	SEC13 Protein SEC13 homolog	SEC13	R.LATC*SSDR.S		1.1	1.35		1.06796	1.27358	2	1.17077	0.145398	0.12419	0.227461
1026	P21333	FLNA Filamin-A	FLNA	R.TPC*EEILVK.H		1.21	1.24		1.17476	1.16981	2	1.17228	0.00349732	0.00298334	0.229322
1025	Q9NYL9	TMOD3 Tropomodulin-3	TMOD3	K.FC*NIMGSSNGVDQEHFSNVVK.G		1.21	1.24		1.17476	1.16981	2	1.17228	0.00349732	0.00298334	0.229322
1347	P49790	NUP153 Nuclear pore complex protein Nup153	NUP153	R.IDNKC*STGYEK.N		0.89	1.57		0.864078	1.48113	2	1.1726	0.436323	0.372098	0.229717
1058	Q15365	PCBP1 Poly(rC)-binding protein 1	PCBP1	R.LVVPATQC*GSLIGK.G	1.09	1.34	1.26	1.0283	1.30097	1.18868	3	1.17265	0.137039	0.116863	0.229773
945	P17813	ENG Endoglin	ENG	R.LNIISPDLSGC*TSK.G		1.26	1.19		1.2233	1.12264	2	1.17297	0.071177	0.0606809	0.230168
494	P43034	PAFAH1B1 Platelet-activating factor acetylhydrolase IB subu	PAFAH1B1	R.MVRPNQDGTLIASC*SNDQTVR.V	1.74	1.05	0.91	1.64151	1.01942	0.858491	3	1.17314	0.413524	0.352494	0.230374
908	Q4G0F5	VPS26B Vacuolar protein sorting-associated protein 26B	VPS26B	R.TPSQLSDNNC*RQ.-		1.29	1.16		1.25243	1.09434	2	1.17338	0.111785	0.0952671	0.230674
797	P62753	RPS6 40S ribosomal protein S6	RPS6	K.GHSC*YR.P	1.47	1.15	1.08	1.38679	1.1165	1.01887	3	1.17406	0.190594	0.162338	0.2315
1262	Q9NVP2	ASF1B Histone chaperone ASF1B	ASF1B	K.GLGLPGC*IPGLLPENSMDCI.-		1.01	1.45		0.980583	1.36792	2	1.17425	0.273892	0.233248	0.231744
1188	P21964	COMT Catechol O-methyltransferase	COMT	K.IVDAVIQEHQPSVLLELGAYC*GYSAVR.M		1.08	1.38		1.04854	1.30189	2	1.17522	0.179141	0.152432	0.232925
1066	P41227	NAA10 N-alpha-acetyltransferase 10	NAA10	K.GNSPPSSGEAC*R.E		1.19	1.27		1.15534	1.19811	2	1.17673	0.0302454	0.025703	0.234779
1027	Q9ULV4	CORO1C Coronin-1C	CORO1C	K.SIKDTIC*NQDER.I		1.22	1.24		1.18447	1.16981	2	1.17714	0.0103624	0.00880307	0.235284
1090	P08238	HSP90AB1 Heat shock protein HSP 90-beta	HSP90AB1	R.VFIMDSC*DELIPEYLNFIR.G	1.19	1.23	1.29	1.12264	1.19417	1.21698	3	1.17793	0.0492225	0.0417872	0.236257
1305	Q6I9Y2	THOC7 THO complex subunit 7 homolog	THOC7	K.IYKEIEC*SIAGAHEK.I		0.97	1.5		0.941748	1.41509	2	1.17842	0.334707	0.28403	0.236855
1033	Q96TA1	FAM129B Niban-like protein 1	FAM129B	K.GPTKEELC*K.S	1.3	1.17	1.25	1.22642	1.13592	1.17925	3	1.18053	0.04526	0.0383388	0.239432
1149	Q9BXP5	SRRT Serrate RNA effector molecule homolog	SRRT	R.LREC*ELSPGVNR.D		1.13	1.34		1.09709	1.26415	2	1.18062	0.118132	0.100059	0.239544
909	P34896	SHMT1 Serine hydroxymethyltransferase, cytosolic	SHMT1	R.AVLEALGSC*LNNK.Y		1.31	1.16		1.27184	1.09434	2	1.18309	0.125515	0.106091	0.242562
984	P04350	TUBB4A Tubulin beta-4A chain	TUBB4A	K.NMMAAC*DPR.H	1.23	1.29	1.21	1.16038	1.25243	1.14151	3	1.18477	0.0593463	0.050091	0.244609
1408	P09382	LGALS1 Galectin-1	LGALS1	R.FNAHGDANTIVC*NSK.D		0.76	1.73		0.737864	1.63208	2	1.18497	0.632303	0.533603	0.24485
1150	P55072	VCP Transitional endoplasmic reticulum ATPase	VCP	R.QAAPC*VLFFDELDSIAK.A		1.14	1.34		1.1068	1.26415	2	1.18547	0.111267	0.0938584	0.245463
1108	Q9UHR6	ZNHIT2 Zinc finger HIT domain-containing protein 2	ZNHIT2	R.VLGDVPGAC*TPVVPTR.I		1.18	1.3		1.14563	1.22642	2	1.18602	0.0571229	0.0481634	0.246132
1354	P62318	SNRPD3 Small nuclear ribonucleoprotein Sm D3	SNRPD3	K.VLHEAEGHIVTC*ETNTGEVYR.G		0.91	1.58		0.883495	1.49057	2	1.18703	0.429264	0.361628	0.247357
982	P53611	RABGGTB Geranylgeranyl transferase type-2 subunit beta	RABGGTB	K.KDDYEYC*MSEYLR.M		1.27	1.21		1.23301	1.14151	2	1.18726	0.0647005	0.0544956	0.247635
946	P21333	FLNA Filamin-A	FLNA	K.VGTEC*GNQK.V		1.29	1.19		1.25243	1.12264	2	1.18753	0.0917723	0.0772797	0.247969
726	Q9Y305	ACOT9 Acyl-coenzyme A thioesterase 9, mitochondrial	ACOT9	K.SLEIC*HPQER.N	1.75	0.96	1.04	1.65094	0.932039	0.981132	3	1.18804	0.401639	0.338069	0.248581
935	P68366	TUBA4A Tubulin alpha-4A chain	TUBA4A	K.TIGGGDDSFTTFFC*ETGAGK.H	1.23	1.33	1.18	1.16038	1.29126	1.11321	3	1.18828	0.092249	0.0776322	0.248878
1034	Q9BW85	CCDC94 Coiled-coil domain-containing protein 94	CCDC94	K.ADPDC*SNGQPQAAPTPGAPQNRK.E		1.24	1.25		1.20388	1.17925	2	1.19156	0.0174218	0.014621	0.252857
960	Q16270	IGFBP7 Insulin-like growth factor-binding protein 7	IGFBP7	K.SRYPVCGSDGTTYPSGC*QLR.A		1.29	1.2		1.25243	1.13208	2	1.19225	0.0851015	0.0713788	0.253688
1270	Q99439	CNN2 Calponin-2	CNN2	K.AGQC*VIGLQMGTNK.C		1.04	1.46		1.00971	1.37736	2	1.19353	0.259968	0.217813	0.255239
1121	P07814	EPRS Bifunctional glutamate/proline--tRNA ligase	EPRS	K.LNQWC*NVVR.W		1.19	1.31		1.15534	1.23585	2	1.19559	0.0569286	0.0476153	0.257728
1054	Q7Z3J2	C16orf62 UPF0505 protein C16orf62	C16orf62	R.HGC*ADTR.T		1.24	1.26		1.20388	1.18868	2	1.19628	0.010751	0.00898704	0.258557
1306	Q9NPD3	EXOSC4 Exosome complex component RRP41	EXOSC4	K.SC*EMGLQLR.Q		1.01	1.5		0.980583	1.41509	2	1.19784	0.307246	0.256501	0.260433
596	Q9H8V3	ECT2 Protein ECT2	ECT2	K.VTHLVANC*TQGEK.F	1.81	1	0.97	1.70755	0.970874	0.915094	3	1.19784	0.442301	0.369249	0.260433
1177	P35579	MYH9 Myosin-9	MYH9	K.KLEEEQIILEDQNC*K.L		1.14	1.37		1.1068	1.29245	2	1.19962	0.131279	0.109434	0.262583
1157	Q15796	SMAD2 Mothers against decapentaplegic homolog 2	SMAD2	K.AITTQNC*NTK.C		1.16	1.35		1.12621	1.27358	2	1.1999	0.104207	0.0868467	0.262913
1028	P68366	TUBA4A Tubulin alpha-4A chain	TUBA4A	R.AVC*MLSNTTAIAEAWAR.L	1.25	1.29	1.24	1.17925	1.25243	1.16981	3	1.20049	0.0452216	0.0376692	0.263629
910	Q7RTV0	PHF5A PHD finger-like domain-containing protein 5A	PHF5A	R.ICDEC*NYGSYQGR.C	1.3	1.32	1.16	1.22642	1.28155	1.09434	3	1.20077	0.0962056	0.08012	0.263959
1055	Q00341	HDLBP Vigilin	HDLBP	R.ANC*EAAR.S		1.25	1.26		1.21359	1.18868	2	1.20114	0.0176161	0.0146662	0.264399
981	P04350	TUBB4A Tubulin beta-4A chain	TUBB4A	K.TAVC*DIPPR.G	1.31	1.27	1.21	1.23585	1.23301	1.14151	3	1.20346	0.0536661	0.0445934	0.267183
1011	P10644	PRKAR1A cAMP-dependent protein kinase type I-alpha regulat	PRKAR1A	R.SLREC*ELYVQK.H	1.27	1.29	1.23	1.19811	1.25243	1.16038	3	1.20364	0.0462731	0.0384443	0.267403
696	P34932	HSPA4 Heat shock 70 kDa protein 4	HSPA4	R.AGGIETIANEYSDRCTPAC*ISFGPK.N		1.49	1.02		1.4466	0.962264	2	1.20443	0.342479	0.284348	0.268354
1168	P04083	ANXA1 Annexin A1	ANXA1	K.C*ATSKPAFFAEK.L		1.16	1.36		1.12621	1.28302	2	1.20462	0.110878	0.0920443	0.268574
1012	P14866	HNRNPL Heterogeneous nuclear ribonucleoprotein L	HNRNPL	K.LNVCVSKQPAIMPGQSYGLEDGSC*SYKDFSESR.N		1.29	1.23		1.25243	1.16038	2	1.2064	0.0650891	0.053953	0.270711
1009	P68366	TUBA4A Tubulin alpha-4A chain	TUBA4A	K.YMAC*CLLYR.G	1.29	1.28	1.23	1.21698	1.24272	1.16038	3	1.20669	0.0421237	0.0349084	0.271058
986	P63244	RACK1 Receptor of activated protein C kinase 1	RACK1	R.FSPNSSNPIIVSC*GWDK.L	1.24	1.35	1.21	1.16981	1.31068	1.14151	3	1.20733	0.0906122	0.0750515	0.271824
1044	Q7L2J0	MEPCE 7SK snRNA methylphosphate capping enzyme	MEPCE	R.C*APSAGSPAAAVGR.E	1.31		1.25	1.23585		1.17925	2	1.20755	0.0400249	0.0331456	0.27208
1152	Q8WW01	TSEN15 tRNA-splicing endonuclease subunit Sen15	TSEN15	R.GDSEPTPGC*SGLGPGGVR.G		1.19	1.34		1.15534	1.26415	2	1.20975	0.0769411	0.0636011	0.274703
1091	P43490	NAMPT Nicotinamide phosphoribosyltransferase	NAMPT	R.DLLNC*SFK.C		1.24	1.29		1.20388	1.21698	2	1.21043	0.00926143	0.00765134	0.275522
1013	Q6NXE6	ARMC6 Armadillo repeat-containing protein 6	ARMC6	R.SAHRDC*EDVAK.A	1.23	1.35	1.23	1.16038	1.31068	1.16038	3	1.21048	0.086777	0.0716882	0.275577
1056	P53582	METAP1 Methionine aminopeptidase 1	METAP1	R.VCETDGC*SSEAK.L		1.27	1.26		1.23301	1.18868	2	1.21084	0.0313464	0.025888	0.276014
434	Q02218	OGDH 2-oxoglutarate dehydrogenase, mitochondrial	OGDH	K.AEQFYC*GDTEGKK.V		1.64	0.88		1.59223	0.830189	2	1.21121	0.538847	0.444883	0.27645
1323	P63220	RPS21 40S ribosomal protein S21	RPS21	K.TYAIC*GAIR.R	1.08	1.22	1.52	1.01887	1.18447	1.43396	3	1.21243	0.208956	0.172344	0.277904
1035	P61158	ACTR3 Actin-related protein 3	ACTR3	R.LPACVVDC*GTGYTK.L	1.32	1.25	1.25	1.24528	1.21359	1.17925	3	1.21271	0.0330278	0.0272348	0.278231
1036	P68366	TUBA4A Tubulin alpha-4A chain	TUBA4A	K.RSIQFVDWC*PTGFK.V	1.28	1.29	1.25	1.20755	1.25243	1.17925	3	1.21307	0.0369026	0.0304207	0.278667
1092	P12004	PCNA Proliferating cell nuclear antigen	PCNA	K.C*AGNEDIITLR.A		1.25	1.29		1.21359	1.21698	2	1.21529	0.00239631	0.00197181	0.281297
1142	P31947	SFN 14-3-3 protein sigma	SFN	K.GAVEKGEELSC*EER.N	1.21	1.29	1.33	1.14151	1.25243	1.25472	3	1.21622	0.0647095	0.0532055	0.282402
961	Q13057	COASY Bifunctional coenzyme A synthase	COASY	R.YATSCYSCC*PR.L		1.34	1.2		1.30097	1.13208	2	1.21652	0.119427	0.0981708	0.282764
911	A6NDU8	C5orf51 UPF0600 protein C5orf51	C5orf51	R.C*PIQLNEGVSFQDLDTAK.L		1.38	1.16		1.33981	1.09434	2	1.21707	0.173571	0.142613	0.283415
1203	Q93052	LPP Lipoma-preferred partner	LPP	K.TYITDPVSAPC*APPLQPK.G		1.16	1.39		1.12621	1.31132	2	1.21877	0.130891	0.107396	0.285423
1202	Q9Y5M8	SRPRB Signal recognition particle receptor subunit beta	SRPRB	R.DTQTSITDSC*AVYR.V		1.16	1.39		1.12621	1.31132	2	1.21877	0.130891	0.107396	0.285423
985	P61163	ACTR1A Alpha-centractin	ACTR1A	K.ERAC*YLSINPQKDETLETEK.A		1.34	1.21		1.30097	1.14151	2	1.22124	0.112756	0.0923293	0.288347
926	Q9UBE0	SAE1 SUMO-activating enzyme subunit 1	SAE1	K.VVFC*PVK.E		1.38	1.17		1.33981	1.10377	2	1.22179	0.1669	0.136603	0.288996
831	O95757	HSPA4L Heat shock 70 kDa protein 4L	HSPA4L	R.GC*ALQCAILSPAFK.V		1.45	1.1		1.40777	1.03774	2	1.22275	0.261652	0.213986	0.290131
1218	Q7Z4W1	DCXR L-xylulose reductase	DCXR	R.AVTNHSVYC*STK.G		1.16	1.4		1.12621	1.32075	2	1.22348	0.137561	0.112434	0.290995
1129	Q9HAU0	PLEKHA5 Pleckstrin homology domain-containing family A mem	PLEKHA5	K.TRPESIC*SVTPSTHDK.T		1.24	1.32		1.20388	1.24528	2	1.22458	0.0292739	0.0239052	0.292291
390	O60921	HUS1 Checkpoint protein HUS1	HUS1	K.ALC*NIVNNK.M		1.69	0.86		1.64078	0.811321	2	1.22605	0.586514	0.478377	0.294016
1110	P63244	RACK1 Receptor of activated protein C kinase 1	RACK1	K.VWNLANC*K.L	1.21	1.35	1.3	1.14151	1.31068	1.22642	3	1.2262	0.0845853	0.0689816	0.294196
1244	Q9NQR4	NIT2 Omega-amidase NIT2	NIT2	R.VGLGIC*YDMR.F		1.14	1.43		1.1068	1.34906	2	1.22793	0.171304	0.139507	0.296224
1342	P52895	AKR1C2 Aldo-keto reductase family 1 member C2	AKR1C2	R.EEPWVDPNSPVLLEDPVLC*ALAK.K	1.08	1.23	1.56	1.01887	1.19417	1.4717	3	1.22825	0.22833	0.185899	0.296601
1068	Q13526	PIN1 Peptidyl-prolyl cis-trans isomerase NIMA-interacti	PIN1	K.IKSGEEDFESLASQFSDC*SSAK.A	1.34	1.26	1.27	1.26415	1.2233	1.19811	3	1.22852	0.033327	0.0271277	0.296923
1191	P67936	TPM4 Tropomyosin alpha-4 chain	TPM4	K.EENVGLHQTLDQTLNELNC*I.-		1.19	1.38		1.15534	1.30189	2	1.22861	0.103624	0.0843425	0.297031
1130	O75348	ATP6V1G1 V-type proton ATPase subunit G 1	ATP6V1G1	R.GSC*STEVEKETQEK.M		1.25	1.32		1.21359	1.24528	2	1.22944	0.0224088	0.0182268	0.297999
1217	Q14247	CTTN Src substrate cortactin	CTTN	K.HC*SQVDSVR.G	1.37	1.11	1.4	1.29245	1.07767	1.32075	3	1.23029	0.13293	0.108048	0.299001
987	P28838	LAP3 Cytosol aminopeptidase	LAP3	R.QVVDC*QLADVNNIGK.Y		1.36	1.21		1.32039	1.14151	2	1.23095	0.126486	0.102755	0.299771
1314	P51858	HDGF Hepatoma-derived growth factor	HDGF	K.C*GDLVFAK.M		1.07	1.51		1.03883	1.42453	2	1.23168	0.272726	0.221426	0.300629
902	Q6UWN8	SPINK6 Serine protease inhibitor Kazal-type 6	SPINK6	R.ESNPHC*GSDGQTYGNK.C		1.42	1.15		1.37864	1.08491	2	1.23177	0.207702	0.16862	0.300737
1057	P04350	TUBB4A Tubulin beta-4A chain	TUBB4A	K.LTTPTYGDLNHLVSATMSGVTTC*LR.F	1.31	1.31	1.26	1.23585	1.27184	1.18868	3	1.23212	0.0417076	0.0338502	0.301148
1178	P55735	SEC13 Protein SEC13 homolog	SEC13	R.FASGGC*DNLIK.L		1.21	1.37		1.17476	1.29245	2	1.23361	0.0832233	0.0674635	0.302881
1039	Q15365	PCBP1 Poly(rC)-binding protein 1	PCBP1	R.VMTIPYQPMPASSPVIC*AGGQDR.C		1.33	1.25		1.29126	1.17925	2	1.23525	0.0792079	0.0641228	0.304807
1038	Q9UBT2	UBA2 SUMO-activating enzyme subunit 2	UBA2	R.VLVVGAGGIGC*ELLK.N		1.33	1.25		1.29126	1.17925	2	1.23525	0.0792079	0.0641228	0.304807
1070	P68366	TUBA4A Tubulin alpha-4A chain	TUBA4A	K.AYHEQLSVAEITNAC*FEPANQMVK.C	1.27	1.35	1.27	1.19811	1.31068	1.19811	3	1.23564	0.0649902	0.0525966	0.305253
1277	P17987	TCP1 T-complex protein 1 subunit alpha	TCP1	R.YINENLIVNTDELGRDC*LINAAK.T	1.03	1.4	1.46	0.971698	1.35922	1.37736	3	1.23609	0.229152	0.185384	0.305788
1040	P07814	EPRS Bifunctional glutamate/proline--tRNA ligase	EPRS	R.VAC*VQVVIIPCGITNALSEEDKEALIAK.C		1.34	1.25		1.30097	1.17925	2	1.24011	0.086073	0.0694077	0.310466
1333	P48735	IDH2 Isocitrate dehydrogenase [NADP], mitochondrial	IDH2	K.DLAGC*IHGLSNVK.L	1.09		1.54	1.0283		1.45283	2	1.24057	0.300187	0.241976	0.310999
1307	Q9HB19	PLEKHA2 Pleckstrin homology domain-containing family A mem	PLEKHA2	R.RSQSYIPTSGC*R.A		1.1	1.5		1.06796	1.41509	2	1.24153	0.24546	0.197708	0.312117
1279	P49327	FASN Fatty acid synthase	FASN	K.LTPGC*EAEAETEAICFFVQQFTDMEHNR.V		1.13	1.47		1.09709	1.38679	2	1.24194	0.204852	0.164946	0.312595
1069	P41250	GARS Glycine--tRNA ligase	GARS	R.SCYDLSC*HAR.A		1.33	1.27		1.29126	1.19811	2	1.24469	0.0658662	0.0529179	0.315784
1359	P61758	VBP1 Prefoldin subunit 3	VBP1	K.DSC*GKGEMATGNGR.R		1.02	1.59		0.990291	1.5	2	1.24515	0.360419	0.289459	0.316314
1320	P09211	GSTP1 Glutathione S-transferase P	GSTP1	R.TLGLYGKDQQEAALVDMVNDGVEDLRC*K.Y		1.09	1.52		1.05825	1.43396	2	1.24611	0.265667	0.213198	0.317428
1298	P63167	DYNLL1 Dynein light chain 1, cytoplasmic	DYNLL1	K.NADMSEEMQQDSVEC*ATQALEK.Y		1.12	1.49		1.08738	1.40566	2	1.24652	0.225059	0.18055	0.317905
936	Q9UBB4	ATXN10 Ataxin-10	ATXN10	K.ETTNIFSNC*GC*VR.A	1.2	1.54	1.18	1.13208	1.49515	1.11321	3	1.24681	0.215272	0.172658	0.318241
1308	P26641	EEF1G Elongation factor 1-gamma	EEF1G	K.AAAPAPEEEMDEC*EQALAAEPK.A	1.16	1.27	1.5	1.09434	1.23301	1.41509	3	1.24748	0.160866	0.128953	0.319018
1037	P15121	AKR1B1 Aldose reductase	AKR1B1	R.VC*ALLSCTSHK.D	1.38	1.3	1.25	1.30189	1.26214	1.17925	3	1.24776	0.0625725	0.0501481	0.319336
1219	O60763	USO1 General vesicular transport factor p115	USO1	K.C*QNEQLQTAVTQQVSQIQQHK.D		1.21	1.4		1.17476	1.32075	2	1.24776	0.103236	0.0827372	0.319336
1131	P24941	CDK2 Cyclin-dependent kinase 2	CDK2	R.APEILLGC*K.Y		1.29	1.32		1.25243	1.24528	2	1.24886	0.00505169	0.00404506	0.320606
1094	Q9GZU8	FAM192A Protein FAM192A	FAM192A	R.LKPDPEPDDKNQEPSSC*K.S		1.32	1.29		1.28155	1.21698	2	1.24927	0.0456595	0.036549	0.321082
1271	P11413	G6PD Glucose-6-phosphate 1-dehydrogenase	G6PD	R.TQVC*GILR.E		1.16	1.46		1.12621	1.37736	2	1.25179	0.177586	0.141866	0.323988
1245	P28062	PSMB8 Proteasome subunit beta type-8	PSMB8	K.LLSNMMC*QYR.G		1.19	1.43		1.15534	1.34906	2	1.2522	0.136978	0.10939	0.324463
1143	Q14151	SAFB2 Scaffold attachment factor B2	SAFB2	K.ILDILGETC*K.S		1.29	1.33		1.25243	1.25472	2	1.25357	0.00161913	0.00129161	0.326045
1029	P63244	RACK1 Receptor of activated protein C kinase 1	RACK1	K.LWNTLGVC*K.Y		1.38	1.24		1.33981	1.16981	2	1.25481	0.120204	0.0957949	0.327467
1282	P13639	EEF2 Elongation factor 2	EEF2	R.FTDTRKDEQERC*ITIK.S	1.23	1.26	1.47	1.16038	1.2233	1.38679	3	1.25682	0.116871	0.092989	0.329782
789	P09001	MRPL3 39S ribosomal protein L3, mitochondrial	MRPL3	K.YTSKENC*NGK.M		1.55	1.07		1.50485	1.00943	2	1.25714	0.350315	0.278659	0.33015
1237	Q9NW82	WDR70 WD repeat-containing protein 70	WDR70	R.SNVVRDC*SK.S		1.21	1.42		1.17476	1.33962	2	1.25719	0.116577	0.0927286	0.330203
715	Q92598	HSPH1 Heat shock protein 105 kDa	HSPH1	R.AGGIETIANEFSDRC*TPSVISFGSK.N		1.59	1.03		1.54369	0.971698	2	1.25769	0.404459	0.321588	0.330781
598	Q9NQ88	TIGAR Fructose-2,6-bisphosphatase TIGAR	TIGAR	K.EADQKEQFSQGSPSNC*LETSLAEIFPLGK.N		1.65	0.97		1.60194	0.915094	2	1.25852	0.485674	0.38591	0.331726
1041	Q96KB5	PBK Lymphokine-activated killer T-cell-originated prot	PBK	K.INPIC*NDHYR.S		1.38	1.25		1.33981	1.17925	2	1.25953	0.113533	0.0901399	0.33288
1014	Q12841	FSTL1 Follistatin-related protein 1	FSTL1	K.KSVSPSASPVVC*YQSNRDELR.R		1.4	1.23		1.35922	1.16038	2	1.2598	0.140605	0.111609	0.333195
1335	P29144	TPP2 Tripeptidyl-peptidase 2	TPP2	K.KETGAASFLC*R.Y		1.09	1.55		1.05825	1.46226	2	1.26026	0.285679	0.226683	0.333719
1321	Q9BTE6	AARSD1 Alanyl-tRNA editing protein Aarsd1	AARSD1	R.VVNIEGVDSNMCC*GTHVSNLSDLQVIK.I		1.12	1.52		1.08738	1.43396	2	1.26067	0.245072	0.194398	0.334191
1204	P53384	NUBP1 Cytosolic Fe-S cluster assembly factor NUBP1	NUBP1	R.GASC*QGCPNQR.L		1.25	1.39		1.21359	1.31132	2	1.26246	0.0691045	0.0547381	0.336234
1180	O75874	IDH1 Isocitrate dehydrogenase [NADP] cytoplasmic	IDH1	K.SEGGFIWAC*K.N		1.27	1.37		1.23301	1.29245	2	1.26273	0.0420326	0.0332871	0.336548
1179	Q9P258	RCC2 Protein RCC2	RCC2	K.AVQDLC*GWR.I		1.27	1.37		1.23301	1.29245	2	1.26273	0.0420326	0.0332871	0.336548
1030	Q9H0A8	COMMD4 COMM domain-containing protein 4	COMMD4	R.LLC*SQVLK.E		1.4	1.24		1.35922	1.16981	2	1.26452	0.133934	0.105917	0.338587
1348	P07814	EPRS Bifunctional glutamate/proline--tRNA ligase	EPRS	K.ERPTPSLNNNC*TTSEDSLVLYNR.V		1.08	1.57		1.04854	1.48113	2	1.26484	0.305886	0.241838	0.338952
1272	P21333	FLNA Filamin-A	FLNA	K.AHVVPC*FDASK.V	1.22	1.31	1.46	1.15094	1.27184	1.37736	3	1.26672	0.113295	0.0894397	0.341093
1144	Q15365	PCBP1 Poly(rC)-binding protein 1	PCBP1	R.INISEGNC*PER.I	1.32	1.34	1.33	1.24528	1.30097	1.25472	3	1.26699	0.0298037	0.0235232	0.341405
1311	P00492	HPRT1 Hypoxanthine-guanine phosphoribosyltransferase	HPRT1	K.SYC*NDQSTGDIK.V	1.07	1.42	1.5	1.00943	1.37864	1.41509	3	1.26772	0.224426	0.177031	0.34224
1095	O14929	HAT1 Histone acetyltransferase type B catalytic subunit	HAT1	K.VDENFDC*VEADDVEGK.I		1.36	1.29		1.32039	1.21698	2	1.26868	0.0731199	0.0576344	0.343334
1096	P31040	SDHA Succinate dehydrogenase [ubiquinone] flavoprotein	SDHA	R.VGSVLQEGC*GK.I		1.36	1.29		1.32039	1.21698	2	1.26868	0.0731199	0.0576344	0.343334
998	P40261	NNMT Nicotinamide N-methyltransferase	NNMT	K.CDVTQSQPLGAVPLPPADCVLSTLC*LDAACPDLPTYCR.A		1.43	1.22		1.38835	1.15094	2	1.26965	0.167871	0.132219	0.344427
1195	P60842	EIF4A1 Eukaryotic initiation factor 4A-I	EIF4A1	K.VVMALGDYMGASCHAC*IGGTNVR.A	1.29	1.33	1.38	1.21698	1.29126	1.30189	3	1.27004	0.0462593	0.0364234	0.344878
1328	P22102	GART Trifunctional purine biosynthetic protein adenosin	GART	R.LLEGDGGPNTGGMGAYC*PAPQVSNDLLLK.I		1.13	1.53		1.09709	1.4434	2	1.27024	0.244877	0.19278	0.345103
864	Q9Y4B4	RAD54L2 Helicase ARIP4	RAD54L2	R.IKNC*QASTSQALK.N		1.53	1.12		1.48544	1.0566	2	1.27102	0.303231	0.238573	0.345987
1263	P04350	TUBB4A Tubulin beta-4A chain	TUBB4A	K.VSDTVVEPYNATLSVHQLVENTDETYC*IDNEALYDIC*FR.T		1.21	1.45		1.17476	1.36792	2	1.27134	0.13659	0.107438	0.346351
1205	Q13162	PRDX4 Peroxiredoxin-4	PRDX4	R.TREEEC*HFYAGGQVYPGEASR.V		1.27	1.39		1.23301	1.31132	2	1.27217	0.0553743	0.0435276	0.347286
1193	Q7Z6K5	ARPIN Arpin	ARPIN	K.C*NFTGDGK.T		1.28	1.38		1.24272	1.30189	2	1.2723	0.0418383	0.032884	0.347442
1227	P63220	RPS21 40S ribosomal protein S21	RPS21	K.C*SASNR.I	1.29	1.31	1.41	1.21698	1.27184	1.33019	3	1.273	0.0566127	0.0444717	0.348238
1042	P33993	MCM7 DNA replication licensing factor MCM7	MCM7	R.GNINIC*LMGDPGVAK.S		1.41	1.25		1.36893	1.17925	2	1.27409	0.134129	0.105274	0.349466
1133	Q16576	RBBP7 Histone-binding protein RBBP7	RBBP7	R.VHIPNDDAQFDASHC*DSDKGEFGGFGSVTGK.I	1.26	1.43	1.32	1.18868	1.38835	1.24528	3	1.2741	0.102908	0.0807688	0.349483
1246	P49589	CARS Cysteine--tRNA ligase, cytoplasmic	CARS	R.VQPQWSPPAGTQPC*R.L		1.24	1.43		1.20388	1.34906	2	1.27647	0.102653	0.0804193	0.35216
1194	O15382	BCAT2 Branched-chain-amino-acid aminotransferase, mitoch	BCAT2	R.EVFGSGTAC*QVCPVHR.I		1.29	1.38		1.25243	1.30189	2	1.27716	0.0349732	0.0273837	0.352936
1170	P53384	NUBP1 Cytosolic Fe-S cluster assembly factor NUBP1	NUBP1	K.NC*DKGQSFFIDAPDSPATLAYR.S		1.31	1.36		1.27184	1.28302	2	1.27743	0.00790136	0.00618535	0.353246
1360	Q8TEQ6	GEMIN5 Gem-associated protein 5	GEMIN5	R.EPVIC*TPVSSGFEK.S		1.09	1.59		1.05825	1.5	2	1.27913	0.312363	0.2442	0.355159
1015	Q01581	HMGCS1 Hydroxymethylglutaryl-CoA synthase, cytoplasmic	HMGCS1	K.LSIQC*YLSALDR.C		1.44	1.23		1.39806	1.16038	2	1.27922	0.168066	0.131382	0.355262
1315	O60361	NME2P1 Putative nucleoside diphosphate kinase	NME2P1	R.GDFC*IQVGR.N		1.17	1.51		1.13592	1.42453	2	1.28023	0.204075	0.159406	0.356398
1264	Q15631	TSN Translin	TSN	R.GFNKETAAAC*VEK.-	1.37	1.22	1.45	1.29245	1.18447	1.36792	3	1.28161	0.0922082	0.0719469	0.357962
1171	P60981	DSTN Destrin	DSTN	K.HECQANGPEDLNRAC*IAEK.L		1.32	1.36		1.28155	1.28302	2	1.28229	0.00103624	0.000808122	0.358718
1153	P46109	CRKL Crk-like protein	CRKL	K.RVPC*AYDK.T		1.34	1.34		1.30097	1.26415	2	1.28256	0.0260356	0.0202997	0.359027
1016	P31040	SDHA Succinate dehydrogenase [ubiquinone] flavoprotein	SDHA	K.TLNEADC*ATVPPAIR.S		1.45	1.23		1.40777	1.16038	2	1.28407	0.174931	0.136231	0.360726
1340	Q8IV48	ERI1 3-5 exoribonuclease 1	ERI1	K.EIAITNGC*INR.M		1.13	1.56		1.09709	1.4717	2	1.28439	0.26489	0.206237	0.361086
1300	P62906	RPL10A 60S ribosomal protein L10a	RPL10A	K.FSVC*VLGDQQHCDEAK.A		1.2	1.49		1.16505	1.40566	2	1.28535	0.170138	0.132367	0.362166
1435	Q12874	SF3A3 Splicing factor 3A subunit 3	SF3A3	K.C*GGTLEER.A		0.87	1.83		0.84466	1.72642	2	1.28554	0.623495	0.485007	0.362372
1280	P35998	PSMC2 26S proteasome regulatory subunit 7	PSMC2	R.SVC*TEAGMFAIR.A		1.22	1.47		1.18447	1.38679	2	1.28563	0.143066	0.111281	0.362475
1253	P22102	GART Trifunctional purine biosynthetic protein adenosin	GART	K.QVLVAPGNAGTAC*SEK.I		1.25	1.44		1.21359	1.35849	2	1.28604	0.102459	0.0796697	0.362937
1181	Q9UBT2	UBA2 SUMO-activating enzyme subunit 2	UBA2	K.ILSGKIDQC*R.T		1.32	1.37		1.28155	1.29245	2	1.287	0.00770706	0.00598838	0.364016
1240	Q9BWD1	ACAT2 Acetyl-CoA acetyltransferase, cytosolic	ACAT2	R.ATVAPEDVSEVIFGHVLAAGC*GQNPVR.Q	1.07	1.56	1.42	1.00943	1.51456	1.33962	3	1.28787	0.25651	0.199173	0.364991
1059	Q14C86	GAPVD1 GTPase-activating protein and VPS9 domain-containi	GAPVD1	R.LQELESC*SGLGSTSDDTDVR.E		1.43	1.26		1.38835	1.18868	2	1.28851	0.141188	0.109574	0.365709
1207	O00233	PSMD9 26S proteasome non-ATPase regulatory subunit 9	PSMD9	K.GIGMNEPLVDC*EGYPR.S		1.31	1.39		1.27184	1.31132	2	1.29158	0.0279138	0.0216121	0.36914
1303	P49321	NASP Nuclear autoantigenic sperm protein	NASP	R.KPTDGASSSNC*VTDISHLVR.K	1.25	1.33	1.49	1.17925	1.29126	1.40566	3	1.29206	0.11321	0.0876198	0.369669
1301	Q02543	RPL18A 60S ribosomal protein L18a	RPL18A	R.DLTTAGAVTQC*YR.D		1.22	1.49		1.18447	1.40566	2	1.29506	0.156408	0.120773	0.373023
1290	Q9H3P7	ACBD3 Golgi resident protein GCP60	ACBD3	K.QVLMGPYNPDTC*PEVGFFDVLGNDR.R		1.23	1.48		1.19417	1.39623	2	1.2952	0.142872	0.110309	0.373176
1247	Q7RTV0	PHF5A PHD finger-like domain-containing protein 5A	PHF5A	R.LCEKC*DGK.C		1.28	1.43		1.24272	1.34906	2	1.29589	0.0751924	0.0580239	0.373941
1172	Q9Y490	TLN1 Talin-1	TLN1	K.HTSALC*NSCR.L		1.35	1.36		1.31068	1.28302	2	1.29685	0.0195591	0.015082	0.375011
1281	Q14738	PPP2R5D Serine/threonine-protein phosphatase 2A 56 kDa reg	PPP2R5D	K.C*TAKPSSSGK.D		1.25	1.47		1.21359	1.38679	2	1.30019	0.122471	0.0941946	0.378725
1228	Q09666	AHNAK Neuroblast differentiation-associated protein AHNA	AHNAK	K.LEGDLTGPSVDVEVPDVELEC*PDAK.L		1.31	1.41		1.27184	1.33019	2	1.30102	0.0412555	0.0317102	0.379639
1254	P23528	CFL1 Cofilin-1	CFL1	K.HELQANC*YEEVK.D	1.33	1.33	1.44	1.25472	1.29126	1.35849	3	1.30149	0.0526374	0.0404439	0.380164
1719	O00148	DDX39A ATP-dependent RNA helicase DDX39A	DDX39A	K.QC*MMFSATLSK.D	1.36	1.36		1.28302	1.32039		2	1.3017	0.0264242	0.0202997	0.380401
1276	P50990	CCT8 T-complex protein 1 subunit theta	CCT8	K.AHEILPNLVCC*SAK.N	1.25	1.39	1.46	1.17925	1.34951	1.37736	3	1.30204	0.10725	0.082371	0.380773
1135	P63244	RACK1 Receptor of activated protein C kinase 1	RACK1	K.YTVQDESHSEWVSC*VR.F	1.3	1.48	1.32	1.22642	1.43689	1.24528	3	1.30286	0.116456	0.0893844	0.381686
1043	P61160	ACTR2 Actin-related protein 2	ACTR2	K.VVVC*DNGTGFVK.C		1.47	1.25		1.42718	1.17925	2	1.30321	0.175319	0.134528	0.382075
1302	Q96BN8	OTULIN Ubiquitin thioesterase otulin	OTULIN	K.AAASGQPRPEMQC*PAEHEEDMYR.A		1.25	1.49		1.21359	1.40566	2	1.30963	0.135813	0.103703	0.389155
1256	P62906	RPL10A 60S ribosomal protein L10a	RPL10A	K.FSVC*VLGDQQHC*DEAK.A	1.07	1.61	1.44	1.00943	1.56311	1.35849	3	1.31034	0.279959	0.213653	0.389945
947	P13639	EEF2 Elongation factor 2	EEF2	K.STLTDSLVC*K.A	1.62	1.32	1.19	1.5283	1.28155	1.12264	3	1.31083	0.204409	0.155938	0.390483
1208	P48507	GCLM Glutamate--cysteine ligase regulatory subunit	GCLM	K.C*PSTHSEELHDCIQK.T		1.35	1.39		1.31068	1.31132	2	1.311	0.000453357	0.00034581	0.390668
1343	P61247	RPS3A 40S ribosomal protein S3a	RPS3A	K.LITEDVQGKNC*LTNFHGMDLTR.D	1.14	1.43	1.56	1.07547	1.38835	1.4717	3	1.31184	0.2089	0.159242	0.391592
882	P23396	RPS3 40S ribosomal protein S3	RPS3	K.GC*EVVVSGK.L	1.88	1.12	1.14	1.77358	1.08738	1.07547	3	1.31215	0.399663	0.304587	0.391927
1355	P40222	TXLNA Alpha-taxilin	TXLNA	R.VTEAPC*YPGAPSTEASGQTGPQEPTSAR.A		1.17	1.58		1.13592	1.49057	2	1.31324	0.250771	0.190955	0.393135
937	Q9BV44	THUMPD3 THUMP domain-containing protein 3	THUMPD3	R.AVLLTQDTKC*FTK.A		1.56	1.18		1.51456	1.11321	2	1.31389	0.283801	0.216002	0.393839
1273	P53396	ACLY ATP-citrate synthase	ACLY	K.FIC*TTSAIQNR.F	1.35	1.33	1.46	1.27358	1.29126	1.37736	3	1.31407	0.0555188	0.0422495	0.39404
1220	P49591	SARS Serine--tRNA ligase, cytoplasmic	SARS	K.YAGLSTC*FR.Q		1.35	1.4		1.31068	1.32075	2	1.31572	0.00712418	0.00541467	0.395849
1409	P21333	FLNA Filamin-A	FLNA	K.MSC*MDNK.D		1.03	1.73		1	1.63208	2	1.31604	0.446945	0.339614	0.396201
1349	O75369	FLNB Filamin-B	FLNB	K.C*LATGPGIASTVK.T		1.19	1.57		1.15534	1.48113	2	1.31824	0.23037	0.174756	0.398609
1341	P26599	PTBP1 Polypyrimidine tract-binding protein 1	PTBP1	K.LSLDGQNIYNAC*CTLR.I		1.2	1.56		1.16505	1.4717	2	1.31837	0.216834	0.164471	0.398759
1230	P17813	ENG Endoglin	ENG	K.GNC*VSLLSPSPEGDPR.F		1.35	1.41		1.31068	1.33019	2	1.32043	0.013795	0.0104473	0.401012
1221	Q9Y5K6	CD2AP CD2-associated protein	CD2AP	K.DTC*YSPKPSVYLSTPSSASK.A		1.36	1.4		1.32039	1.32075	2	1.32057	0.000259061	0.000196173	0.401162
1134	P28062	PSMB8 Proteasome subunit beta type-8	PSMB8	K.VIEINPYLLGTMSGC*AADCQYWER.L		1.44	1.32		1.39806	1.24528	2	1.32167	0.108028	0.0817363	0.402363
1265	P27708	CAD CAD protein	CAD	K.VHVDC*MTSQK.L		1.32	1.45		1.28155	1.36792	2	1.32474	0.0610736	0.0461024	0.405708
1229	A0AVT1	UBA6 Ubiquitin-like modifier-activating enzyme 6	UBA6	R.KPNVGC*QQDSEELLK.L	1.45	1.32	1.41	1.36792	1.28155	1.33019	3	1.32656	0.0433	0.0326409	0.407685
1309	O60828	PQBP1 Polyglutamine-binding protein 1	PQBP1	K.VFDPSC*GLPYYWNADTDLVSWLSPHDPNSVVTK.S		1.28	1.5		1.24272	1.41509	2	1.32891	0.121888	0.0917207	0.410239
1283	P26196	DDX6 Probable ATP-dependent RNA helicase DDX6	DDX6	K.GNEFEDYC*LKR.E		1.31	1.47		1.27184	1.38679	2	1.32932	0.0812804	0.0611444	0.410687
1182	O60343	TBC1D4 TBC1 domain family member 4	TBC1D4	R.SQKPEAGGC*GAPAAR.E		1.41	1.37		1.36893	1.29245	2	1.33069	0.054079	0.0406397	0.412177
1155	P46063	RECQL ATP-dependent DNA helicase Q1	RECQL	R.AESSQTC*HSEQGDK.K		1.44	1.34		1.39806	1.26415	2	1.3311	0.0946868	0.071134	0.412624
1158	P13797	PLS3 Plastin-3	PLS3	K.VDLNSNGFIC*DYELHELFK.E		1.44	1.35		1.39806	1.27358	2	1.33582	0.0880159	0.065889	0.417727
1292	P30041	PRDX6 Peroxiredoxin-6	PRDX6	R.DFTPVC*TTELGR.A		1.32	1.48		1.28155	1.39623	2	1.33889	0.0810861	0.0605622	0.421037
1291	Q9NZZ3	CHMP5 Charged multivesicular body protein 5	CHMP5	K.APPPSLTDC*IGTVDSR.A		1.32	1.48		1.28155	1.39623	2	1.33889	0.0810861	0.0605622	0.421037
1274	Q86UP2	KTN1 Kinectin	KTN1	K.AKEC*MAGTSGSEEVK.V		1.34	1.46		1.30097	1.37736	2	1.33916	0.0540142	0.0403342	0.421333
1209	Q9P0V9	SEPT10 Septin-10	44084	K.TTC*MSSQGSDDEQIKR.E		1.41	1.39		1.36893	1.31132	2	1.34013	0.0407373	0.0303981	0.422369
1196	P78346	RPP30 Ribonuclease P protein subunit p30	RPP30	K.KPRPSEGDEDC*LPASK.K		1.42	1.38		1.37864	1.30189	2	1.34026	0.0542733	0.0404945	0.422517
1418	P21266	GSTM3 Glutathione S-transferase Mu 3	GSTM3	R.LC*YSSDHEK.L	1.02	1.45	1.75	0.962264	1.40777	1.65094	3	1.34032	0.349258	0.260577	0.422583
1267	P63208	SKP1 S-phase kinase-associated protein 1	SKP1	K.NDFTEEEEAQVRKENQWC*EEK.-	1.29	1.48	1.45	1.21698	1.43689	1.36792	3	1.3406	0.112474	0.083898	0.422878
1336	P46734	MAP2K3 Dual specificity mitogen-activated protein kinase	MAP2K3	K.TMDAGC*KPYMAPER.I		1.26	1.55		1.2233	1.46226	2	1.34278	0.168972	0.125838	0.425226
1310	P78417	GSTO1 Glutathione S-transferase omega-1	GSTO1	K.KLLPDDPYEKAC*QK.M		1.31	1.5		1.27184	1.41509	2	1.34347	0.101293	0.0753964	0.425964
1159	P36969	GPX4 Phospholipid hydroperoxide glutathione peroxidase,	GPX4	R.YAEC*GLR.I		1.46	1.35		1.41748	1.27358	2	1.34553	0.101746	0.0756179	0.428175
1398	Q9Y3F4	STRAP Serine-threonine kinase receptor-associated protei	STRAP	K.IGFPETTEEELEEIASENSDC*IFPSAPDVK.A	1.53	1.02	1.7	1.4434	0.990291	1.60377	3	1.34582	0.318168	0.236412	0.428486
1154	P55263	ADK Adenosine kinase	ADK	R.TGC*TFPEKPDFH.-	1.46	1.44	1.34	1.37736	1.39806	1.26415	3	1.34652	0.0720828	0.0535326	0.429238
1337	P04075	ALDOA Fructose-bisphosphate aldolase A	ALDOA	R.ALANSLAC*QGK.Y		1.27	1.55		1.23301	1.46226	2	1.34764	0.162107	0.12029	0.430432
1351	P42330	AKR1C3 Aldo-keto reductase family 1 member C3	AKR1C3	R.WVDPNSPVLLEDPVLC*ALAK.K	1.27	1.41	1.57	1.19811	1.36893	1.48113	3	1.34939	0.142518	0.105616	0.43231
1197	Q8WUM4	PDCD6IP Programmed cell death 6-interacting protein	PDCD6IP	K.AVQADGQVKEC*YQSHR.D	1.45	1.43	1.38	1.36792	1.38835	1.30189	3	1.35272	0.0451921	0.0334083	0.435864
1293	O95817	BAG3 BAG family molecular chaperone regulator 3	BAG3	R.SQSPAASDC*SSSSSSASLPSSGR.S		1.35	1.48		1.31068	1.39623	2	1.35345	0.0604907	0.0446936	0.436645
1255	Q6FI81	CIAPIN1 Anamorsin	CIAPIN1	R.AASC*GEGK.K		1.39	1.44		1.34951	1.35849	2	1.354	0.00634699	0.00468758	0.43723
1239	P63208	SKP1 S-phase kinase-associated protein 1	SKP1	K.GLLDVTC*K.T		1.41	1.42		1.36893	1.33962	2	1.35428	0.0207249	0.0153033	0.437523
1387	P78417	GSTO1 Glutathione S-transferase omega-1	GSTO1	K.LNEC*VDHTPK.L	1.29	1.31	1.67	1.21698	1.27184	1.57547	3	1.35477	0.193095	0.14253	0.438044
1160	Q2TAA2	IAH1 Isoamyl acetate-hydrolyzing esterase 1 homolog	IAH1	R.VILITPTPLC*ETAWEEQCIIQGCK.L		1.48	1.35		1.43689	1.27358	2	1.35524	0.115476	0.0852074	0.438547
1382	P14649	MYL6B Myosin light chain 6B	MYL6B	K.ILYSQC*GDVMR.A		1.2	1.64		1.16505	1.54717	2	1.35611	0.270201	0.199247	0.439473
903	P49720	PSMB3 Proteasome subunit beta type-3	PSMB3	K.NC*VAIAADRR.F		1.68	1.15		1.63107	1.08491	2	1.35799	0.386195	0.284388	0.441469
1275	Q14181	POLA2 DNA polymerase alpha subunit B	POLA2	K.VLGC*PEALTGSYK.S		1.38	1.46		1.33981	1.37736	2	1.35858	0.0265537	0.0195452	0.442102
1222	O15067	PFAS Phosphoribosylformylglycinamidine synthase	PFAS	R.GLAPLHWADDDGNPTEQYPLNPNGSPGGVAGICSC*DGR.H		1.44	1.4		1.39806	1.32075	2	1.35941	0.0546619	0.0402101	0.442977
1325	Q9UHD1	CHORDC1 Cysteine and histidine-rich domain-containing prot	CHORDC1	K.TTEKKELC*ELKPK.F	1.27	1.49	1.52	1.19811	1.4466	1.43396	3	1.35956	0.139959	0.102944	0.443139
1447	P62888	RPL30 60S ribosomal protein L30	RPL30	K.LVILANNC*PALR.K	1.02	1.4	1.87	0.962264	1.35922	1.76415	3	1.36188	0.40095	0.294409	0.445599
1350	O76071	CIAO1 Probable cytosolic iron-sulfur protein assembly pr	CIAO1	K.SVAWAPSGNLLATC*SR.D		1.28	1.57		1.24272	1.48113	2	1.36193	0.168584	0.123784	0.445648
1097	O60664	PLIN3 Perilipin-3	PLIN3	K.TVC*DAAEK.G		1.56	1.29		1.51456	1.21698	2	1.36577	0.210422	0.154068	0.449717
1462	O75717	WDHD1 WD repeat and HMG-box DNA-binding protein 1	WDHD1	K.NVLSETPAIC*PPQNTENQRPK.T		0.89	1.98		0.864078	1.86792	2	1.366	0.709827	0.519639	0.449959
1060	Q9BXJ9	NAA15 N-alpha-acetyltransferase 15, NatA auxiliary subun	NAA15	R.LFNTAVC*ESK.D		1.59	1.26		1.54369	1.18868	2	1.36618	0.25103	0.183745	0.450152
1385	P60981	DSTN Destrin	DSTN	K.C*STPEEIK.K	1.33	1.33	1.65	1.25472	1.29126	1.5566	3	1.36753	0.164761	0.120481	0.45157
1210	P48739	PITPNB Phosphatidylinositol transfer protein beta isoform	PITPNB	K.ELANSPDC*PQMCAYK.L		1.47	1.39		1.42718	1.31132	2	1.36925	0.081928	0.0598341	0.453389
1413	Q9BWJ5	SF3B5 Splicing factor 3B subunit 5	SF3B5	K.MLQPC*GPPADKPEEN.-		1.13	1.74		1.09709	1.64151	2	1.3693	0.384965	0.28114	0.453437
1410	Q9BRA2	TXNDC17 Thioredoxin domain-containing protein 17	TXNDC17	K.DAGGKSWC*PDCVQAEPVVR.E		1.14	1.73		1.1068	1.63208	2	1.36944	0.371429	0.271227	0.453582
1284	Q96FW1	OTUB1 Ubiquitin thioesterase OTUB1	OTUB1	K.QEPLGSDSEGVNC*LAYDEAIMAQQDR.I		1.4	1.47		1.35922	1.38679	2	1.37301	0.0194943	0.0141983	0.45734
1482	P25398	RPS12 40S ribosomal protein S12	RPS12	K.LVEALC*AEHQINLIK.V	1.02	1.17	2.15	0.962264	1.13592	2.0283	3	1.3755	0.571975	0.415832	0.459952
1361	P61927	RPL37 60S ribosomal protein L37	RPL37	K.C*GYPAKR.K		1.29	1.59		1.25243	1.5	2	1.37621	0.17506	0.127204	0.460704
1332	O95861	BPNT1 3(2),5-bisphosphate nucleotidase 1	BPNT1	K.TC*ATDLQTK.A		1.34	1.54		1.30097	1.45283	2	1.3769	0.107381	0.0779873	0.461424
1357	P43034	PAFAH1B1 Platelet-activating factor acetylhydrolase IB subu	PAFAH1B1	R.VWVVATKEC*K.A	1.37	1.4	1.58	1.29245	1.35922	1.49057	3	1.38075	0.100795	0.0730005	0.465449
1356	P31749	AKT1 RAC-alpha serine/threonine-protein kinase	AKT1	K.TFC*GTPEYLAPEVLEDNDYGR.A		1.31	1.58		1.27184	1.49057	2	1.38121	0.154659	0.111974	0.465928
1747	P21333	FLNA Filamin-A	FLNA	K.VHSPSGALEEC*YVTEIDQDKYAVR.F	1.2	1.68		1.13208	1.63107		2	1.38157	0.352841	0.255391	0.46631
1404	P33316	DUT Deoxyuridine 5-triphosphate nucleotidohydrolase,	DUT	R.IAQLIC*ER.I		1.18	1.72		1.14563	1.62264	2	1.38414	0.337297	0.243688	0.468986
1081	Q9NZT2	OGFR Opioid growth factor receptor	OGFR	R.TGTQEVGGQDPGEAVQPC*R.Q		1.61	1.28		1.56311	1.20755	2	1.38533	0.251419	0.181487	0.470227
865	Q13309	SKP2 S-phase kinase-associated protein 2	SKP2	K.VSGVC*KR.W		1.77	1.12		1.71845	1.0566	2	1.38753	0.467994	0.337287	0.472514
1285	Q9Y383	LUC7L2 Putative RNA-binding protein Luc7-like 2	LUC7L2	R.FRDQDLASC*DRDR.S		1.43	1.47		1.38835	1.38679	2	1.38757	0.00110101	0.000793479	0.472562
1432	P07203	GPX1 Glutathione peroxidase 1	GPX1	R.FQTIDIEPDIEALLSQGPSC*A.-		1.09	1.82		1.05825	1.71698	2	1.38762	0.465792	0.335677	0.472609
1294	Q15417	CNN3 Calponin-3	CNN3	K.AGQSVIGLQMGTNKC*ASQAGMTAYGTR.R		1.43	1.48		1.38835	1.39623	2	1.39229	0.00556981	0.00400047	0.477458
844	Q96I99	SUCLG2 Succinate--CoA ligase [GDP-forming] subunit beta,	SUCLG2	R.SC*NGPVLVGSPQGGVDIEEVAASNPELIFK.E		1.79	1.11		1.73786	1.04717	2	1.39252	0.488395	0.350728	0.477695
1369	Q15185	PTGES3 Prostaglandin E synthase 3	PTGES3	K.HLNEIDLFHC*IDPNDSK.H	1.34	1.44	1.61	1.26415	1.39806	1.51887	3	1.39369	0.127415	0.0914223	0.478912
1071	P49721	PSMB2 Proteasome subunit beta type-2	PSMB2	R.NLADC*LR.S	1.41	1.71	1.27	1.33019	1.66019	1.19811	3	1.39617	0.238001	0.170468	0.48147
1316	Q16555	DPYSL2 Dihydropyrimidinase-related protein 2	DPYSL2	R.GLYDGPVC*EVSVTPK.T		1.41	1.51		1.36893	1.42453	2	1.39673	0.0393125	0.0281461	0.482053
1344	P23921	RRM1 Ribonucleoside-diphosphate reductase large subunit	RRM1	K.IIDINYYPVPEAC*LSNKR.H	1.34	1.52	1.56	1.26415	1.47573	1.4717	3	1.40386	0.121008	0.0861964	0.489398
1364	P49773	HINT1 Histidine triad nucleotide-binding protein 1	HINT1	K.C*AADLGLNK.G		1.34	1.6		1.30097	1.50943	2	1.4052	0.147406	0.1049	0.490778
734	Q9H845	ACAD9 Acyl-CoA dehydrogenase family member 9, mitochondr	ACAD9	R.AYIC*AHPLDR.T		1.89	1.04		1.83495	0.981132	2	1.40804	0.603741	0.428781	0.49369
1401	Q15370	ELOB Elongin-B	ELOB	R.ADDTFEALC*IEPFSSPPELPDVMKPQDSGSSANEQAVQ.-		1.24	1.71		1.20388	1.61321	2	1.40855	0.289436	0.205486	0.494206
1123	O14562	UBFD1 Ubiquitin domain-containing protein UBFD1	UBFD1	K.AEENKKEPLC*R.Q		1.63	1.31		1.58252	1.23585	2	1.40919	0.245136	0.173956	0.494863
1368	P61978	HNRNPK Heterogeneous nuclear ribonucleoprotein K	HNRNPK	K.IIPTLEEGLQLPSPTATSQLPLESDAVEC*LNYQHYK.G		1.34	1.61		1.30097	1.51887	2	1.40992	0.154076	0.10928	0.495613
1362	P36954	POLR2I DNA-directed RNA polymerase II subunit RPB9	POLR2I	R.NCDYQQEADNSC*IYVNK.I		1.36	1.59		1.32039	1.5	2	1.41019	0.127005	0.0900618	0.495894
927	P43034	PAFAH1B1 Platelet-activating factor acetylhydrolase IB subu	PAFAH1B1	K.FILSC*ADDK.T		1.77	1.17		1.71845	1.10377	2	1.41111	0.434639	0.308012	0.496831
1161	Q14247	CTTN Src substrate cortactin	CTTN	K.C*ALGWDHQEK.L		1.6	1.35		1.5534	1.27358	2	1.41349	0.197858	0.139978	0.499263
1393	Q96HC4	PDLIM5 PDZ and LIM domain protein 5	PDLIM5	K.TAVNVPRQPTVTSVC*SETSQELAEGQR.R		1.27	1.69		1.23301	1.59434	2	1.41367	0.255499	0.180734	0.49945
1190	P25398	RPS12 40S ribosomal protein S12	RPS12	K.LGEWVGLC*K.I	1.93	1.16	1.38	1.82075	1.12621	1.30189	3	1.41629	0.361126	0.254981	0.502112
1383	Q8WVJ2	NUDCD2 NudC domain-containing protein 2	NUDCD2	R.DAANC*WTSLLESEYAADPWVQDQMQR.K		1.33	1.64		1.29126	1.54717	2	1.41922	0.180954	0.127503	0.505094
1329	Q9NTK5	OLA1 Obg-like ATPase 1	OLA1	K.STFFNVLTNSQASAENFPFC*TIDPNESR.V		1.45	1.53		1.40777	1.4434	2	1.42558	0.0251937	0.0176726	0.511551
1388	P27348	YWHAQ 14-3-3 protein theta	YWHAQ	R.YLAEVAC*GDDR.K		1.32	1.67		1.28155	1.57547	2	1.42851	0.207832	0.145488	0.514514
1352	P46821	MAP1B Microtubule-associated protein 1B	MAP1B	R.SALRDAYC*SEVK.A		1.42	1.57		1.37864	1.48113	2	1.42989	0.0724723	0.050684	0.515901
1399	A6NMY6	ANXA2P2 Putative annexin A2-like protein	ANXA2P2	K.GLGTDEDSLIEIIC*SR.T		1.3	1.7		1.26214	1.60377	2	1.43295	0.241574	0.168585	0.518993
1365	Q9NQ88	TIGAR Fructose-2,6-bisphosphatase TIGAR	TIGAR	K.AAREEC*PVFTPPGGETLDQVK.M		1.4	1.6		1.35922	1.50943	2	1.43433	0.106215	0.0740521	0.520376
1286	Q9UNE7	STUB1 E3 ubiquitin-protein ligase CHIP	STUB1	R.AQQAC*IEAK.H		1.53	1.47		1.48544	1.38679	2	1.43611	0.0697522	0.04857	0.522171
1477	O14929	HAT1 Histone acetyltransferase type B catalytic subunit	HAT1	K.LCQDLPC*FSR.E		0.91	2.11		0.883495	1.99057	2	1.43703	0.782817	0.544746	0.523091
1402	Q712K3	UBE2R2 Ubiquitin-conjugating enzyme E2 R2	UBE2R2	K.AEAEKDGVKVPTTLAEYC*IK.T		1.3	1.71		1.26214	1.61321	2	1.43767	0.248245	0.172672	0.523734
1236	P04183	TK1 Thymidine kinase, cytosolic	TK1	R.YSSSFC*THDR.N	1.93	1.19	1.42	1.82075	1.15534	1.33962	3	1.43857	0.343566	0.238824	0.524638
1268	Q96F86	EDC3 Enhancer of mRNA-decapping protein 3	EDC3	K.DLPTSPVDLVINCLDC*PENVFLR.D		1.57	1.45		1.52427	1.36792	2	1.4461	0.110554	0.07645	0.532166
1324	Q9NXG2	THUMPD1 THUMP domain-containing protein 1	THUMPD1	R.RC*DAGGPR.Q	1.72	1.35	1.52	1.62264	1.31068	1.43396	3	1.45576	0.157119	0.107929	0.541774
1031	O00410	IPO5 Importin-5	IPO5	K.STACQMLVC*YAK.E		1.8	1.24		1.74757	1.16981	2	1.45869	0.408539	0.280072	0.544675
866	Q9P2R3	ANKFY1 Rabankyrin-5	ANKFY1	R.GSHTDAPDTATGNC*LLQR.A		1.92	1.12		1.86408	1.0566	2	1.46034	0.57097	0.390984	0.546305
1124	P34932	HSPA4 Heat shock 70 kDa protein 4	HSPA4	R.WNSPAEEGSSDC*EVFSK.N		1.74	1.31		1.68932	1.23585	2	1.46258	0.320653	0.219237	0.54852
1072	P48200	IREB2 Iron-responsive element-binding protein 2	IREB2	K.C*AIQNAPNPGGGDLQK.A		1.78	1.27		1.72816	1.19811	2	1.46313	0.374796	0.25616	0.549062
1338	P49841	GSK3B Glycogen synthase kinase-3 beta	GSK3B	R.TTSFAESC*KPVQQPSAFGSMK.V		1.51	1.55		1.46602	1.46226	2	1.46414	0.00265537	0.0018136	0.550055
1377	Q53EL6	PDCD4 Programmed cell death protein 4	PDCD4	R.AVGDGILC*NTYIDSYKGTVDCVQAR.A		1.44	1.63		1.39806	1.53774	2	1.4679	0.098767	0.0672847	0.553751
1414	P25398	RPS12 40S ribosomal protein S12	RPS12	K.VVGCSC*VVVK.D	1.5	1.39	1.74	1.41509	1.34951	1.64151	3	1.46871	0.153202	0.104311	0.554546
1375	P49915	GMPS GMP synthase [glutamine-hydrolyzing]	GMPS	R.VICAEEPYIC*K.D		1.46	1.62		1.41748	1.5283	2	1.47289	0.0783659	0.0532056	0.558649
1454	Q99829	CPNE1 Copine-1	CPNE1	R.VRNC*SSPEFSK.T	1.25	1.48	1.92	1.17925	1.43689	1.81132	3	1.47582	0.317831	0.215359	0.561517
1394	P08133	ANXA6 Annexin A6	ANXA6	R.QRQEVC*QSYK.S	1	1.95	1.69	0.943396	1.8932	1.59434	3	1.47698	0.485658	0.328818	0.56265
1374	P47756	CAPZB F-actin-capping protein subunit beta	CAPZB	K.DETVSDC*SPHIANIGR.L	1.7	1.35	1.62	1.60377	1.31068	1.5283	3	1.48092	0.152184	0.102763	0.566492
1390	O15067	PFAS Phosphoribosylformylglycinamidine synthase	PFAS	K.FC*DNSSAIQGK.E		1.42	1.68		1.37864	1.58491	2	1.48177	0.145851	0.0984302	0.567325
1370	O15355	PPM1G Protein phosphatase 1G	PPM1G	R.GTEAGQVGEPGIPTGEAGPSC*SSASDKLPR.V		1.49	1.61		1.4466	1.51887	2	1.48273	0.0510998	0.0344632	0.568261
1206	Q06323	PSME1 Proteasome activator complex subunit 1	PSME1	K.VDVFREDLC*TK.T	1.99	1.31	1.39	1.87736	1.27184	1.31132	3	1.48684	0.338773	0.227848	0.572251
1371	Q9UGI8	TES Testin	TES	K.SEALGVGDVKLPC*EMDAQGPK.Q		1.5	1.61		1.45631	1.51887	2	1.48759	0.0442347	0.0297358	0.572976
1358	Q00534	CDK6 Cyclin-dependent kinase 6	CDK6	R.LFDVC*TVSR.T		1.53	1.58		1.48544	1.49057	2	1.488	0.00362685	0.0024374	0.573376
1241	Q86YS7	C2CD5 C2 domain-containing protein 5	C2CD5	R.SAPPC*ANSTVGVVK.M		1.7	1.42		1.65049	1.33962	2	1.49505	0.219813	0.147027	0.580198
1423	A6NDG6	PGP Glycerol-3-phosphate phosphatase	PGP	K.NNQESDC*VSKK.K		1.36	1.77		1.32039	1.66981	2	1.4951	0.247079	0.165259	0.580242
1317	P63244	RACK1 Receptor of activated protein C kinase 1	RACK1	K.AEPPQC*TSLAWSADGQTLFAGYTDNLVR.V		1.62	1.51		1.57282	1.42453	2	1.49867	0.104855	0.0699652	0.583685
1136	Q9NZL9	MAT2B Methionine adenosyltransferase 2 subunit beta	MAT2B	K.EFQQNNWHAVGC*GFR.R		1.81	1.32		1.75728	1.24528	2	1.50128	0.362038	0.241152	0.586195
1304	Q8NBF2	NHLRC2 NHL repeat-containing protein 2	NHLRC2	K.AILFSQPLQITDTQQGC*IAPVELR.Y		1.65	1.49		1.60194	1.40566	2	1.5038	0.138792	0.092294	0.588614
1486	Q13084	MRPL28 39S ribosomal protein L28, mitochondrial	MRPL28	K.TPKEDLC*SK.F	1.18	1.38	2.21	1.11321	1.33981	2.08491	3	1.51264	0.508383	0.33609	0.597068
1231	Q9H1K1	ISCU Iron-sulfur cluster assembly enzyme ISCU, mitochon	ISCU	K.NVGTGLVGAPAC*GDVMK.L		1.75	1.41		1.69903	1.33019	2	1.51461	0.26081	0.172196	0.598945
1372	Q9H6Z4	RANBP3 Ran-binding protein 3	RANBP3	K.ALSQTVPSSGTNGVSLPADC*TGAVPAASPDTAAWR.S		1.56	1.61		1.51456	1.51887	2	1.51672	0.00304397	0.00200695	0.600951
1449	Q9H773	DCTPP1 dCTP pyrophosphatase 1	DCTPP1	K.YTELPHGAISEDQAVGPADIPC*DSTGQTST.-		1.3	1.88		1.26214	1.77358	2	1.51786	0.361649	0.238262	0.602039
1468	P04083	ANXA1 Annexin A1	ANXA1	K.MYGISLC*QAILDETKGDYEK.I	1	1.78	2	0.943396	1.72816	1.88679	3	1.51945	0.505142	0.332451	0.603547
1403	Q9Y6K9	IKBKG NF-kappa-B essential modulator	IKBKG	R.C*QQQMAEDKASVK.A		1.47	1.71		1.42718	1.61321	2	1.5202	0.131538	0.0865271	0.604257
1098	P78346	RPP30 Ribonuclease P protein subunit p30	RPP30	R.LTIIVSDPSHC*NVLR.A	1.23	2.25	1.29	1.16038	2.18447	1.21698	3	1.52061	0.575614	0.378542	0.604648
1366	Q9NXH9	TRMT1 tRNA (guanine(26)-N(2))-dimethyltransferase	TRMT1	R.GDQCC*YSHSPPTPR.V		1.58	1.6		1.53398	1.50943	2	1.52171	0.0173571	0.0114063	0.605691
1425	Q9Y3F4	STRAP Serine-threonine kinase receptor-associated protei	STRAP	K.C*VLPEEDSGELAKPK.I		1.41	1.78		1.36893	1.67925	2	1.52409	0.219425	0.143971	0.607947
1419	P21291	CSRP1 Cysteine and glycine-rich protein 1	CSRP1	K.TVYFAEEVQC*EGNSFHK.S		1.45	1.75		1.40777	1.65094	2	1.52936	0.171952	0.112434	0.612924
1436	P25398	RPS12 40S ribosomal protein S12	RPS12	R.QAHLC*VLASNCDEPMYVK.L	1.44	1.55	1.83	1.35849	1.50485	1.72642	3	1.52992	0.185239	0.121077	0.613456
1406	P55786	NPEPPS Puromycin-sensitive aminopeptidase	NPEPPS	R.SKDGVC*VR.V	1.51	1.59	1.72	1.42453	1.54369	1.62264	3	1.53029	0.0997343	0.0651736	0.613802
1460	O94905	ERLIN2 Erlin-2	ERLIN2	K.AKADAEC*YTAMK.I		1.25	1.96		1.21359	1.84906	2	1.53132	0.449341	0.293433	0.61478
1430	O00299	CLIC1 Chloride intracellular channel protein 1	CLIC1	K.IGNC*PFSQR.L	1.37	1.65	1.81	1.29245	1.60194	1.70755	3	1.53398	0.215731	0.140635	0.61728
1223	Q86W50	METTL16 U6 small nuclear RNA (adenine-(43)-N(6))-methyltra	METTL16	K.VTYTEFC*QGR.T		1.8	1.4		1.74757	1.32075	2	1.53416	0.301806	0.196723	0.617452
1420	Q9NVG8	TBC1D13 TBC1 domain family member 13	TBC1D13	K.SLDDSQC*GITYK.M		1.46	1.75		1.41748	1.65094	2	1.53421	0.165087	0.107604	0.617496
1492	P61247	RPS3A 40S ribosomal protein S3a	RPS3A	R.LFC*VGFTK.K	0.76	1.74	2.33	0.716981	1.68932	2.19811	3	1.5348	0.752559	0.490328	0.618055
1183	Q5TFE4	NT5DC1 5-nucleotidase domain-containing protein 1	NT5DC1	K.HFLSDTGMAC*R.S	1.95	1.53	1.37	1.83962	1.48544	1.29245	3	1.53917	0.277514	0.180301	0.622153
716	P48163	ME1 NADP-dependent malic enzyme	ME1	R.SQMYSTDYDQILPDC*YSWPEEVQK.I		2.17	1.03		2.1068	0.971698	2	1.53925	0.802635	0.521447	0.622225
1461	P15880	RPS2 40S ribosomal protein S2	RPS2	K.C*SKEVATAIR.G		1.27	1.96		1.23301	1.84906	2	1.54103	0.435611	0.282675	0.623898
1416	P47756	CAPZB F-actin-capping protein subunit beta	CAPZB	K.GC*WDSIHVVEVQEK.S		1.49	1.74		1.4466	1.64151	2	1.54406	0.13782	0.0892587	0.626725
1415	P56537	EIF6 Eukaryotic translation initiation factor 6	EIF6	R.ASFENNCEIGC*FAK.L		1.49	1.74		1.4466	1.64151	2	1.54406	0.13782	0.0892587	0.626725
1457	Q08J23	NSUN2 tRNA (cytosine(34)-C(5))-methyltransferase	NSUN2	R.MVYSTC*SLNPIEDEAVIASLLEK.S	1.32	1.61	1.94	1.24528	1.56311	1.83019	3	1.54619	0.292819	0.189381	0.62872
1269	Q9Y5Y2	NUBP2 Cytosolic Fe-S cluster assembly factor NUBP2	NUBP2	R.AVHQC*DR.G	1.7	1.72	1.45	1.60377	1.6699	1.36792	3	1.5472	0.158739	0.102598	0.62966
1405	P37802	TAGLN2 Transgelin-2	TAGLN2	K.DGTVLC*ELINALYPEGQAPVKK.I		1.52	1.72		1.47573	1.62264	2	1.54918	0.103883	0.0670568	0.631509
1428	Q96Q11	TRNT1 CCA tRNA nucleotidyltransferase 1, mitochondrial	TRNT1	K.YQGEHC*LLK.E	1.26	1.82	1.8	1.18868	1.76699	1.69811	3	1.55126	0.315888	0.203633	0.633441
1453	P21333	FLNA Filamin-A	FLNA	K.THEAEIVEGENHTYC*IR.F		1.34	1.91		1.30097	1.80189	2	1.55143	0.354201	0.228306	0.633598
1424	P13639	EEF2 Elongation factor 2	EEF2	K.DLEEDHAC*IPIKK.S		1.48	1.77		1.43689	1.66981	2	1.55335	0.164698	0.106027	0.635385
1446	O75391	SPAG7 Sperm-associated antigen 7	SPAG7	K.TYGC*VPVANKR.D		1.39	1.87		1.34951	1.76415	2	1.55683	0.293192	0.188326	0.638614
1353	P29401	TKT Transketolase	TKT	K.QAFTDVATGSLGQGLGAAC*GMAYTGK.Y		1.69	1.57		1.64078	1.48113	2	1.56095	0.112886	0.0723184	0.642428
1422	Q9Y696	CLIC4 Chloride intracellular channel protein 4	CLIC4	K.AGSDGESIGNC*PFSQR.L	1.55	1.61	1.76	1.46226	1.56311	1.66038	3	1.56192	0.099062	0.0634234	0.643317
1473	P20810	CAST Calpastatin	CAST	R.TSMC*SIQSAPPEPATLK.G		1.28	2.04		1.24272	1.92453	2	1.58362	0.482112	0.304436	0.663229
1452	P60866	RPS20 40S ribosomal protein S20	RPS20	K.SLEKVC*ADLIR.G		1.44	1.89		1.39806	1.78302	2	1.59054	0.272208	0.171142	0.669515
1407	P29401	TKT Transketolase	TKT	R.MAAISESNINLC*GSHCGVSIGEDGPSQMALEDLAMFR.S	1.62	1.7	1.72	1.5283	1.65049	1.62264	3	1.60048	0.0640365	0.0400109	0.678501
1459	Q13148	TARDBP TAR DNA-binding protein 43	TARDBP	R.NPVSQC*MR.G		1.41	1.95		1.36893	1.83962	2	1.60428	0.332829	0.207463	0.681924
1455	P27816	MAP4 Microtubule-associated protein 4	MAP4	K.TEGGGSEAPLC*PGPPAGEEPAISEAAPEAGAPTSASGLNGHPTLSGGGDQR.E		1.43	1.94		1.38835	1.83019	2	1.60927	0.312427	0.194142	0.686406
1479	P60981	DSTN Destrin	DSTN	K.HEC*QANGPEDLNR.A	1.29	1.65	2.13	1.21698	1.60194	2.00943	3	1.60945	0.39628	0.24622	0.68657
1439	P50552	VASP Vasodilator-stimulated phosphoprotein	VASP	K.SSSSVTTSETQPC*TPSSSDYSDLQR.V		1.54	1.84		1.49515	1.73585	2	1.6155	0.170203	0.105356	0.691978
1440	Q6PCE3	PGM2L1 Glucose 1,6-bisphosphate synthase	PGM2L1	R.GQVTSSC*SSQR.L		1.55	1.85		1.50485	1.74528	2	1.62507	0.170009	0.104616	0.700501
1184	Q09028	RBBP4 Histone-binding protein RBBP4	RBBP4	R.YMPQNPC*IIATK.T		2.04	1.37		1.98058	1.29245	2	1.63652	0.486581	0.297327	0.710629
1378	P63244	RACK1 Receptor of activated protein C kinase 1	RACK1	R.YWLC*AATGPSIK.I		1.8	1.63		1.74757	1.53774	2	1.64265	0.148377	0.0903277	0.716029
1456	P02795	MT2A Metallothionein-2	MT2A	K.KSC*CSCCPVGCAK.C		1.5	1.94		1.45631	1.83019	2	1.64325	0.264372	0.160883	0.716552
1476	P40429	RPL13A 60S ribosomal protein L13a	RPL13A	R.C*EGINISGNFYR.N		1.35	2.1		1.31068	1.98113	2	1.64591	0.474081	0.288037	0.718882
1278	Q99436	PSMB7 Proteasome subunit beta type-7	PSMB7	R.C*EKGTTAVLTEK.I		1.98	1.46		1.92233	1.37736	2	1.64984	0.385353	0.233569	0.72233
1478	Q9ULC4	MCTS1 Malignant T-cell-amplified sequence 1	MCTS1	K.FDEKENVSNC*IQLK.T	1.09	1.98	2.12	1.0283	1.92233	2	3	1.65021	0.539987	0.327223	0.72265
1467	P52789	HK2 Hexokinase-2	HK2	K.ASGC*EGEDVVTLLK.E		1.46	2		1.41748	1.88679	2	1.65213	0.331857	0.200866	0.724331
1708	P21333	FLNA Filamin-A	FLNA	K.LQVEPAVDTSGVQC*YGPGIEGQGVFR.E	2.2	1.28		2.07547	1.24272		2	1.6591	0.588845	0.35492	0.730397
1411	P60174	TPI1 Triosephosphate isomerase	TPI1	K.IAVAAQNC*YK.V		1.75	1.73		1.69903	1.63208	2	1.66555	0.0473434	0.028425	0.736001
1450	P31153	MAT2A S-adenosylmethionine synthase isoform type-2	MAT2A	K.VAC*ETVAK.T		1.64	1.88		1.59223	1.77358	2	1.68291	0.128235	0.0761985	0.750957
1498	P68036	UBE2L3 Ubiquitin-conjugating enzyme E2 L3	UBE2L3	K.GQVC*LPVISAENWKPATK.T	1.34	1.46	2.51	1.26415	1.41748	2.36792	3	1.68318	0.597938	0.355242	0.751193
845	P31040	SDHA Succinate dehydrogenase [ubiquinone] flavoprotein	SDHA	R.TYFSC*TSAHTSTGDGTAMITR.A		2.48	1.11		2.40777	1.04717	2	1.72747	0.962087	0.556935	0.788659
1472	P61927	RPL37 60S ribosomal protein L37	RPL37	K.THTLC*R.R		1.6	2.03		1.5534	1.91509	2	1.73425	0.255758	0.147475	0.794309
1465	P21291	CSRP1 Cysteine and glycine-rich protein 1	CSRP1	K.GLESTTLADKDGEIYC*K.G	1.69		1.99	1.59434		1.87736	2	1.73585	0.200125	0.115289	0.795642
1429	Q96EP5	DAZAP1 DAZ-associated protein 1	DAZAP1	R.NIDPKPC*TPR.G		1.84	1.8		1.78641	1.69811	2	1.74226	0.0624337	0.0358349	0.80096
1318	Q86UU0	BCL9L B-cell CLL/lymphoma 9-like protein	BCL9L	K.TGNGGAQSQHQNVNQGPTC*NVGSK.G		2.13	1.51		2.06796	1.42453	2	1.74624	0.454976	0.260545	0.804256
1458	Q9Y570	PPME1 Protein phosphatase methylesterase 1	PPME1	K.QC*EGITSPEGSK.S		1.73	1.94		1.67961	1.83019	2	1.7549	0.106474	0.0606724	0.811389
1395	P14866	HNRNPL Heterogeneous nuclear ribonucleoprotein L	HNRNPL	K.ASLNGADIYSGC*CTLK.I		2	1.69		1.94175	1.59434	2	1.76804	0.245655	0.138941	0.822154
1503	P14618	PKM Pyruvate kinase PKM	PKM	K.C*CSGAIIVLTK.S	1.4	1.44	2.75	1.32075	1.39806	2.59434	3	1.77105	0.714036	0.403171	0.824606
1426	Q0VDG4	SCRN3 Secernin-3	SCRN3	K.YGQGGNC*TEGR.M		1.95	1.79		1.8932	1.68868	2	1.79094	0.144621	0.0807512	0.840718
1493	P49903	SEPHS1 Selenide, water dikinase 1	SEPHS1	R.FTELKGTGC*K.V		1.4	2.37		1.35922	2.23585	2	1.79754	0.619868	0.344843	0.846021
1185	O14744	PRMT5 Protein arginine N-methyltransferase 5	PRMT5	R.DLNC*VPEIADTLGAVAK.Q		2.38	1.37		2.31068	1.29245	2	1.80157	0.719995	0.39965	0.849252
1757	Q04721	NOTCH2 Neurogenic locus notch homolog protein 2	NOTCH2	R.IGGYSC*R.C	1.54	2.22		1.45283	2.15534		2	1.80408	0.496749	0.275347	0.851267
1433	Q9BWD1	ACAT2 Acetyl-CoA acetyltransferase, cytosolic	ACAT2	R.QASVGAGIPYSVPAWSCQMIC*GSGLK.A		1.96	1.82		1.90291	1.71698	2	1.80995	0.131473	0.0726394	0.855947
1417	Q99436	PSMB7 Proteasome subunit beta type-7	PSMB7	R.ATEGMVVADKNC*SK.I		2.06	1.74		2	1.64151	2	1.82075	0.253491	0.139223	0.864537
1487	P42224	STAT1 Signal transducer and activator of transcription 1	STAT1	K.DKVMC*IEHEIK.S		1.61	2.22		1.56311	2.09434	2	1.82872	0.375638	0.20541	0.870837
1412	O00273	DFFA DNA fragmentation factor subunit alpha	DFFA	R.EQHGVAASC*LEDLR.S		2.13	1.73		2.06796	1.63208	2	1.85002	0.308218	0.166603	0.88754
1494	P23528	CFL1 Cofilin-1	CFL1	K.AVLFC*LSEDKK.N		1.51	2.39		1.46602	2.25472	2	1.86037	0.557693	0.299776	0.895588
1441	A1L0T0	ILVBL Acetolactate synthase-like protein	ILVBL	K.VLHDAQQQC*R.D		2.06	1.85		2	1.74528	2	1.87264	0.180112	0.0961808	0.905075
1490	P00390	GSR Glutathione reductase, mitochondrial	GSR	K.LGGTC*VNVGCVPK.K		1.66	2.27		1.61165	2.14151	2	1.87658	0.374667	0.199654	0.908106
1481	Q9UGI8	TES Testin	TES	R.TQYSCYC*CK.L		1.81	2.14		1.75728	2.01887	2	1.88807	0.184969	0.0979673	0.916916
1469	Q96GX9	APIP Methylthioribulose-1-phosphate dehydratase	APIP	R.C*GAQDKEHPR.Y		1.96	2		1.90291	1.88679	2	1.89485	0.0113987	0.0060156	0.922086
1504	P00558	PGK1 Phosphoglycerate kinase 1	PGK1	R.GCITIIGGGDTATC*C*AK.W		1.27	2.77		1.23301	2.61321	2	1.92311	0.975947	0.507484	0.94344
1448	Q16644	MAPKAPK3 MAP kinase-activated protein kinase 3	MAPKAPK3	K.QAGSSSASQGC*NNQ.-		2.16	1.87		2.09709	1.76415	2	1.93062	0.235422	0.121941	0.949064
1480	Q53LP3	SOWAHC Ankyrin repeat domain-containing protein SOWAHC	SOWAHC	R.SVC*PGGSSPGSSSGGGR.G		1.96	2.13		1.90291	2.00943	2	1.95617	0.075322	0.0385047	0.968034
1438	P37802	TAGLN2 Transgelin-2	TAGLN2	K.NMAC*VQR.T	2.9	1.47	1.84	2.73585	1.42718	1.73585	3	1.96629	0.68409	0.347908	0.975479
1495	P06132	UROD Uroporphyrinogen decarboxylase	UROD	R.AAQDFFSTC*R.S		1.73	2.39		1.67961	2.25472	2	1.96716	0.406661	0.206724	0.976117
1507	P21266	GSTM3 Glutathione S-transferase Mu 3	GSTM3	K.RYTC*GEAPDYDR.S	1.39	2.06	2.93	1.31132	2	2.76415	3	2.02516	0.726742	0.358857	1.01803
1470	P60981	DSTN Destrin	DSTN	K.LGGSLIVAFEGC*PV.-		2.45	2		2.37864	1.88679	2	2.13272	0.347789	0.163073	1.09269
1508	Q9BT09	CNPY3 Protein canopy homolog 3	CNPY3	K.GKDTSC*LAEQWSGK.K		1.58	3.01		1.53398	2.83962	2	2.1868	0.923228	0.422182	1.12882
1506	P21291	CSRP1 Cysteine and glycine-rich protein 1	CSRP1	R.C*SQAVYAAEK.V		1.78	2.86		1.72816	2.69811	2	2.21313	0.685864	0.309906	1.14609
1511	Q9NP77	SSU72 RNA polymerase II subunit A C-terminal domain phos	SSU72	R.VAVVC*SSNQNR.S		2.34	3.41		2.27184	3.21698	2	2.74441	0.668312	0.243517	1.4565
1505	P04406	GAPDH Glyceraldehyde-3-phosphate dehydrogenase	GAPDH	K.IISNASC*TTNCLAPLAK.V	5.07	3.01	2.85	4.78302	2.92233	2.68868	3	3.46468	1.14768	0.331252	1.79272
1512	P21266	GSTM3 Glutathione S-transferase Mu 3	GSTM3	K.IAAYLQSDQFC*K.M		4.38	3.63		4.25243	3.42453	2	3.83848	0.585413	0.152512	1.94053
