# Supplementary material for: Monitoring GAPDH activity and inhibition with cysteine-reactive chemical probes
Source: Royal Society of Chemistry journal article supplement (doi:10.1039/d2cb00091a), 2022-01-01
Supplement: d2cb00091a5.xlsx [file d2cb00091a5.xlsx]

## Sheet: Sheet1
protein construct	additive	Average ΔTm vs protein+2% DMSO
2μM GAPDH WT	2 μM NAD+	2.12b
	4 μM NAD+	2.59c
	10 μM NAD+	4.03c
	20 μM NAD+	5.51c
	40 μM NAD+	7.20d
	50 μM NAD+	5.86d
	100 μM NAD+	9.52d
	200 μM NAD+	11.21d
	2 μM KA	-3.31b
	4 μM KA	-3.64c
	10 μM KA	-3.71c
	20 μM KA	-3.41b
	50 μM KA	-3.84d
	2 μM NAD+, 2 μM KA	-2.79d
	2 μM NAD+, 4 μM KA	-2.90c
	2 μM NAD+, 10 μM KA	-3.13c
	2 μM NAD+, 20 μM KA	-3.14c
	2 μM NAD+, 50 μM KA	-3.41d
	20 μM NAD+, 2 μM KA	-1.11c
	20 μM NAD+, 4 μM KA	-2.41d
	20 μM NAD+, 10 μM KA	-2.41d
	20 μM NAD+, 20 μM KA	-2.41d
	20 μM NAD+, 50 μM KA	-2.41d
2μM GAPDH C152S	10 μM KA	0.20d
	20 μM KA	-0.47d
	50 μM NAD+	0.36c
	50 μM NAD+, 20 μM KA	0.02c
2μM GAPDH C152A	20 μM KA	-0.23c
	50 μM NAD+	0.68c
	50 μM NAD+, 20 μM KA	-0.08c

## Sheet: Sheet2
Protein construct	Additive	Average ΔTm vs protein+2% DMSO
2μM GAPDH WT	2 μM NAD+	2.12b
	4 μM NAD+	2.59c
	10 μM NAD+	4.03c
	20 μM NAD+	5.51c
	40 μM NAD+	7.20d
	50 μM NAD+	5.86d
	100 μM NAD+	9.52d
	200 μM NAD+	11.21d
	2 μM KA	-3.31b
	4 μM KA	-3.64c
	10 μM KA	-3.71c
	20 μM KA	-3.41b
	50 μM KA	-3.84d
	2 μM NAD+, 2 μM KA	-2.79d
	2 μM NAD+, 4 μM KA	-2.90c
	2 μM NAD+, 10 μM KA	-3.13c
	2 μM NAD+, 20 μM KA	-3.14c
	2 μM NAD+, 50 μM KA	-3.41d
	20 μM NAD+, 2 μM KA	-1.11c
	20 μM NAD+, 4 μM KA	-2.41d
	20 μM NAD+, 10 μM KA	-2.41d
	20 μM NAD+, 20 μM KA	-2.41d
	20 μM NAD+, 50 μM KA	-2.41d
2μM GAPDH C152S	10 μM KA	0.20d
	20 μM KA	-0.47d
	50 μM NAD+	0.36c
	50 μM NAD+, 20 μM KA	0.02c
2μM GAPDH C152A	20 μM KA	-0.23c
	50 μM NAD+	0.68c
	50 μM NAD+, 20 μM KA	-0.08c
