# Supplementary material for: Monitoring GAPDH activity and inhibition with cysteine-reactive chemical probes
Source: Royal Society of Chemistry journal article supplement (doi:10.1039/d2cb00091a), 2022-01-01
Supplement: d2cb00091a6.xlsx [file d2cb00091a6.xlsx]

## Sheet: Sheet1
sample	Theoretical MW of monomer + KA (kDa)	Calculated MW (kDa)
GAPDH WT	36.3255	129
GAPDH WT + 1x KA (1hr)	36.6055	135.45
GAPDH WT + 10x KA (1hr)	36.6055	137.44
GAPDH WT + 1x KA (2hr)	36.6055	136.77
GAPDH WT + 10x KA (2hr)	36.6055	135.67
GAPDH WT + 1x KA (4hr)	36.6055	133.48
GAPDH WT + 10x KA (4hr)	36.6055	135
